# Supplementary material for: Phenotypic and Transcriptional Changes of Pulmonary Immune Responses in Dogs Following Canine Distemper Virus Infection
Source: Int J Mol Sci. 2022 Sep 2;23(17):10019. doi: 10.3390/ijms231710019 (PMC9456005; doi:10.3390/ijms231710019)
Supplement: Supplementary file 1 [file ijms-23-10019-s001.zip › Supplementary_Table_S1_Chludzinski et al_10.08.2022.xlsx]

## Sheet: Sheet 1
Supplementary Table S1: Differentially expressed genes in clusters 1-5
logFC = log-fold change
logCPM = log counts per million
F = F-statistic
FDR = false discovery rate
ENSEMBLE_ID	SYMBOL	ENTREZID	DESCRIPTION	TYPE	go_id	go_names	logFC	logCPM	F	PValue	FDR	Cluster
ENSCAFG00845016852	HERC6	609237	HECT and RLD domain containing E3 ubiquitin protein ligase family member 6 [Source:HGNC Symbol;Acc:HGNC:26072]	protein_coding	GO:0004842,GO:0005829,GO:0005654	ubiquitin-protein transferase activity,cytosol,nucleoplasm	2.80792	7.33747	108.952	6.86166e-07	0.00571532	1
ENSCAFG00845030170	OASL	100685232	2'-5'-oligoadenylate synthetase like [Source:NCBI gene (formerly Entrezgene);Acc:100685232]	protein_coding	GO:0005515,GO:0016779,GO:0003725,GO:0051607,GO:0001730,GO:0003677,GO:0009615,GO:0045071,GO:0070106,GO:1900246,GO:0005654,GO:0005730,GO:0005737,GO:0005829	protein binding,nucleotidyltransferase activity,double-stranded RNA binding,defense response to virus,2'-5'-oligoadenylate synthetase activity,DNA binding,response to virus,negative regulation of viral genome replication,interleukin-27-mediated signaling pathway,positive regulation of RIG-I signaling pathway,nucleoplasm,nucleolus,cytoplasm,cytosol	4.61181	5.30702	102.375	9.27098e-07	0.00571532	1
ENSCAFG00845022277	CMPK2	608996	cytidine/uridine monophosphate kinase 2 [Source:HGNC Symbol;Acc:HGNC:27015]	protein_coding	GO:0050145,GO:0004550,GO:0005654,GO:0005739,GO:0071222,GO:0006165,GO:0009142,GO:0033862,GO:0004127	nucleoside monophosphate kinase activity,nucleoside diphosphate kinase activity,nucleoplasm,mitochondrion,cellular response to lipopolysaccharide,nucleoside diphosphate phosphorylation,nucleoside triphosphate biosynthetic process,UMP kinase activity,cytidylate kinase activity	5.32672	5.26969	100.677	1.00491e-06	0.00571532	1
ENSCAFG00845010366	DHX58	607803	DExH-box helicase 58 [Source:HGNC Symbol;Acc:HGNC:29517]	protein_coding	GO:0003677,GO:0005524,GO:0016787,GO:0003725,GO:0003727,GO:0008270,GO:0009615,GO:0009617,GO:0032480,GO:0032481,GO:0039534,GO:0039536,GO:0045088,GO:0045824,GO:1900245,GO:1900246,GO:0005737	DNA binding,ATP binding,hydrolase activity,double-stranded RNA binding,single-stranded RNA binding,zinc ion binding,response to virus,response to bacterium,negative regulation of type I interferon production,positive regulation of type I interferon production,negative regulation of MDA-5 signaling pathway,negative regulation of RIG-I signaling pathway,regulation of innate immune response,negative…	3.07454	5.58488	98.2503	1.13001e-06	0.00571532	1
ENSCAFG00845022631	RTP4	488122		protein_coding			3.49804	3.53609	85.0771	2.24603e-06	0.00908787	1
ENSCAFG00845012986		611825		protein_coding	GO:0003677,GO:0003723,GO:0003726,GO:0060340	DNA binding,RNA binding,double-stranded RNA adenosine deaminase activity,positive regulation of type I interferon-mediated signaling pathway	3.83354	5.82927	73.5327	4.45889e-06	0.0112005	1
ENSCAFG00845010306		476931		protein_coding			2.74347	7.40335	71.934	4.9397e-06	0.0112005	1
ENSCAFG00845030962	USP18	486763		protein_coding	GO:0006511,GO:0004843,GO:0016579	ubiquitin-dependent protein catabolic process,thiol-dependent deubiquitinase,protein deubiquitination	3.70785	7.45323	70.6892	5.35723e-06	0.0112005	1
ENSCAFG00845018782	EIF2AK2	611397	eukaryotic translation initiation factor 2 alpha kinase 2 [Source:NCBI gene (formerly Entrezgene);Acc:611397]	protein_coding	GO:0005524,GO:0006468,GO:0004672,GO:0003725,GO:0004694,GO:0042802,GO:0001819,GO:0006412,GO:0009615,GO:0017148,GO:0030968,GO:0032722,GO:0032874,GO:0033689,GO:0034198,GO:0035455,GO:0043066,GO:0043410,GO:0045071,GO:0046777,GO:0051092,GO:0051607,GO:1900225,GO:1901224,GO:1901532,GO:1902033,GO:1902036,GO:0005737,GO:0005829,GO:0048471	ATP binding,protein phosphorylation,protein kinase activity,double-stranded RNA binding,eukaryotic translation initiation factor 2alpha kinase activity,identical protein binding,positive regulation of cytokine production,translation,response to virus,negative regulation of translation,endoplasmic reticulum unfolded protein response,positive regulation of chemokine production,positive regulation o…	2.08384	6.61264	63.568	8.74349e-06	0.0147974	1
ENSCAFG00845021979	OAS1	608778	2'-5'-oligoadenylate synthetase 1 [Source:NCBI gene (formerly Entrezgene);Acc:608778]	protein_coding	GO:0016779,GO:0003725,GO:0051607,GO:0001730,GO:0005737,GO:0006006,GO:0009615,GO:0042593,GO:0005829,GO:0005654,GO:0032760,GO:0005634,GO:0003725,GO:0051607,GO:0045071,GO:0042742,GO:0071639,GO:0060339,GO:0032728,GO:0001730,GO:0034138,GO:0034142,GO:0035458,GO:0043129,GO:0060700,GO:0070106,GO:0071659,GO:0098586,GO:0140374,GO:2000342	nucleotidyltransferase activity,double-stranded RNA binding,defense response to virus,2'-5'-oligoadenylate synthetase activity,cytoplasm,glucose metabolic process,response to virus,glucose homeostasis,cytosol,nucleoplasm,positive regulation of tumor necrosis factor production,nucleus,double-stranded RNA binding,defense response to virus,negative regulation of viral genome replication,defense resp…	3.49415	6.35838	62.6035	9.37746e-06	0.0147974	1
ENSCAFG00845012863	RNF213	483355	ring finger protein 213 [Source:HGNC Symbol;Acc:HGNC:14539]	protein_coding	GO:0046872,GO:0004842,GO:0016887,GO:0001525,GO:0042742,GO:0005829,GO:0005730,GO:0120323	metal ion binding,ubiquitin-protein transferase activity,ATPase,angiogenesis,defense response to bacterium,cytosol,nucleolus,	3.10219	9.41059	62.4138	9.50847e-06	0.0147974	1
ENSCAFG00845030104	MX1,MX1	403745,403744	MX dynamin like GTPase 1 [Source:NCBI gene (formerly Entrezgene);Acc:403745],MX dynamin like GTPase 1 [Source:NCBI gene (formerly Entrezgene);Acc:403745]	protein_coding,protein_coding	GO:0005525,GO:0003924,GO:0009615,GO:0035455,GO:0046822,GO:0051607,GO:0051726,GO:0005643	GTP binding,GTPase activity,response to virus,response to interferon-alpha,regulation of nucleocytoplasmic transport,defense response to virus,regulation of cell cycle,nuclear pore	3.53075	8.30598	60.3869	1.10539e-05	0.0159737	1
ENSCAFG00845026194	TRANK1	477018	tetratricopeptide repeat and ankyrin repeat containing 1 [Source:HGNC Symbol;Acc:HGNC:29011]	protein_coding	GO:0005515,GO:0035556	protein binding,intracellular signal transduction	2.53574	6.8242	58.5287	1.27399e-05	0.0161088	1
ENSCAFG00845003006	,	490198,479980	,	protein_coding,protein_coding			3.01829	7.80939	54.3635	1.77709e-05	0.0211485	1
ENSCAFG00845024440	PARP14	608688	poly(ADP-ribose) polymerase family member 14 [Source:HGNC Symbol;Acc:HGNC:29232]	protein_coding	GO:0003950,GO:0005737,GO:0003950,GO:0019899,GO:0010629,GO:0006471,GO:0005829,GO:0005886,GO:1990404,GO:0140289,GO:0060336,GO:0042532,GO:0042531,GO:1902216	NAD+ ADP-ribosyltransferase activity,cytoplasm,NAD+ ADP-ribosyltransferase activity,enzyme binding,negative regulation of gene expression,protein ADP-ribosylation,cytosol,plasma membrane,protein ADP-ribosylase activity,protein mono-ADP-ribosylation,negative regulation of interferon-gamma-mediated signaling pathway,negative regulation of tyrosine phosphorylation of STAT protein,positive regulation…	2.40758	6.97029	51.5773	2.24784e-05	0.0236705	1
ENSCAFG00845003621	NLRC5	487268	NLR family CARD domain containing 5 [Source:HGNC Symbol;Acc:HGNC:29933]	protein_coding	GO:0005515,GO:0045087,GO:0005829,GO:0005634,GO:0032088,GO:0009617,GO:0060339	protein binding,innate immune response,cytosol,nucleus,negative regulation of NF-kappaB transcription factor activity,response to bacterium,negative regulation of type I interferon-mediated signaling pathway	1.99213	6.70945	49.0475	2.80901e-05	0.0270615	1
ENSCAFG00845016977	HERC5	478474	HECT and RLD domain containing E3 ubiquitin protein ligase 5 [Source:HGNC Symbol;Acc:HGNC:24368]	protein_coding	GO:0004842,GO:0005737,GO:0061630,GO:0030332,GO:0016567,GO:0042296,GO:0032020,GO:0050688	ubiquitin-protein transferase activity,cytoplasm,ubiquitin protein ligase activity,cyclin binding,protein ubiquitination,ISG15 transferase activity,ISG15-protein conjugation,regulation of defense response to virus	2.48557	5.30325	44.2194	4.42067e-05	0.0388846	1
ENSCAFG00845005800		100684769		protein_coding	GO:0016020,GO:0005525	membrane,GTP binding	3.03261	7.54457	40.9578	6.14948e-05	0.049764	1
ENSCAFG00845002091		119871834		protein_coding	GO:0006915	apoptotic process	3.21939	3.79519	38.3879	8.10024e-05	0.0606948	1
ENSCAFG00845019484		609817		protein_coding	GO:0006355,GO:0005515,GO:0003700,GO:0000976	regulation of transcription, DNA-templated,protein binding,DNA-binding transcription factor activity,transcription cis-regulatory region binding	2.40523	2.45055	36.6982	9.78893e-05	0.0692893	1
ENSCAFG00845001939	IFIT1	488947		protein_coding	GO:0005515,GO:0005737,GO:0009615,GO:0050688,GO:0071357,GO:0071360	protein binding,cytoplasm,response to virus,regulation of defense response to virus,cellular response to type I interferon,cellular response to exogenous dsRNA	5.48911	5.89819	36.571	9.93223e-05	0.0692893	1
ENSCAFG00845013275	SAMD9L	482305	sterile alpha motif domain containing 9 like [Source:HGNC Symbol;Acc:HGNC:1349]	protein_coding	GO:0005515	protein binding	2.40146	7.95361	36.2442	0.00010312	0.0695409	1
ENSCAFG00845012039	CGAS	611033	cyclic GMP-AMP synthase [Source:HGNC Symbol;Acc:HGNC:21367]	protein_coding	GO:0005634,GO:0003677,GO:0005886,GO:0005829,GO:0006974,GO:0051607,GO:0005546,GO:0019933,GO:0003682,GO:0003690,GO:0019934,GO:0002218,GO:0032481,GO:0035861,GO:2000042,GO:0002230,GO:0061501,GO:0038001	nucleus,DNA binding,plasma membrane,cytosol,cellular response to DNA damage stimulus,defense response to virus,phosphatidylinositol-4,5-bisphosphate binding,cAMP-mediated signaling,chromatin binding,double-stranded DNA binding,cGMP-mediated signaling,activation of innate immune response,positive regulation of type I interferon production,site of double-strand break,negative regulation of double-s…	3.35496	4.03715	35.489	0.000112581	0.0734715	1
ENSCAFG00845001906	IFIT3	606808		protein_coding	GO:0005515,GO:0005737,GO:0009615,GO:0050688,GO:0071357,GO:0071360,GO:0035457	protein binding,cytoplasm,response to virus,regulation of defense response to virus,cellular response to type I interferon,cellular response to exogenous dsRNA,cellular response to interferon-alpha	3.47908	5.94153	33.3641	0.000145299	0.0918605	1
ENSCAFG00845030313	IFIH1	488371	interferon induced with helicase C domain 1 [Source:HGNC Symbol;Acc:HGNC:18873]	protein_coding	GO:0003677,GO:0005524,GO:0016787,GO:0042981,GO:0005737,GO:0003723,GO:0005739,GO:0045087,GO:0051607,GO:0008270,GO:0016925,GO:0042802,GO:0009615,GO:0009615,GO:0032755,GO:0043021,GO:0060760,GO:0032728,GO:0032760,GO:0003725,GO:0045071,GO:0003727,GO:0071360,GO:0032727,GO:0098586,GO:0039530	DNA binding,ATP binding,hydrolase activity,regulation of apoptotic process,cytoplasm,RNA binding,mitochondrion,innate immune response,defense response to virus,zinc ion binding,protein sumoylation,identical protein binding,response to virus,response to virus,positive regulation of interleukin-6 production,ribonucleoprotein complex binding,positive regulation of response to cytokine stimulus,posit…	2.32066	6.93653	32.3132	0.000165622	0.0952764	1
ENSCAFG00845021778	TRIM22	485284	tripartite motif containing 22 [Source:HGNC Symbol;Acc:HGNC:16379]	protein_coding	GO:0008270,GO:0005515,GO:0003713,GO:0019901,GO:0030674,GO:0042802,GO:0010508,GO:0032880,GO:0043123,GO:0051091,GO:0051092,GO:0005634,GO:0005654,GO:0005737,GO:0005794,GO:0016604	zinc ion binding,protein binding,transcription coactivator activity,protein kinase binding,protein-macromolecule adaptor activity,identical protein binding,positive regulation of autophagy,regulation of protein localization,positive regulation of I-kappaB kinase/NF-kappaB signaling,positive regulation of DNA-binding transcription factor activity,positive regulation of NF-kappaB transcription fact…	2.48146	6.2494	31.8165	0.000176398	0.0964518	1
ENSCAFG00845025854	STAT1	488449	signal transducer and activator of transcription 1 [Source:HGNC Symbol;Acc:HGNC:11362]	protein_coding	GO:0003677,GO:0006355,GO:0007165,GO:0003700,GO:0000977,GO:0000978,GO:0000979,GO:0000981,GO:0001222,GO:0001223,GO:0003690,GO:0005164,GO:0016922,GO:0019899,GO:0035035,GO:0042393,GO:0042802,GO:0042803,GO:0044389,GO:1990841,GO:0001937,GO:0002230,GO:0007259,GO:0010742,GO:0016525,GO:0032727,GO:0033209,GO:0035456,GO:0035458,GO:0043124,GO:0045648,GO:0045893,GO:0045944,GO:0046725,GO:0051607,GO:0060333,GO:…	DNA binding,regulation of transcription, DNA-templated,signal transduction,DNA-binding transcription factor activity,RNA polymerase II transcription regulatory region sequence-specific DNA binding,RNA polymerase II cis-regulatory region sequence-specific DNA binding,RNA polymerase II core promoter sequence-specific DNA binding,DNA-binding transcription factor activity, RNA polymerase II-specific,…	1.38874	7.56487	31.1163	0.000193041	0.0989411	1
ENSCAFG00845005777		NA		lncRNA			2.772	6.79421	30.6344	0.000205587	0.100156	1
ENSCAFG00845005668	IFGGC1	481471	interferon-inducible GTPase 1-like [Source:NCBI gene (formerly Entrezgene);Acc:481471]	protein_coding	GO:0016020,GO:0005525	membrane,GTP binding	2.87635	7.21586	29.7135	0.000232375	0.104471	1
ENSCAFG00845015829	,	111089951,488622	,	protein_coding,protein_coding	GO:0002218,GO:0035458	activation of innate immune response,cellular response to interferon-beta	1.61916	6.67241	29.25	0.000247422	0.108203	1
ENSCAFG00845023649	PARP9	488010	poly(ADP-ribose) polymerase family member 9 [Source:HGNC Symbol;Acc:HGNC:24118]	protein_coding	GO:0003950	NAD+ ADP-ribosyltransferase activity	1.61932	5.85616	27.1616	0.000331466	0.127798	1
ENSCAFG00845021928	TEX14	480572	testis expressed 14, intercellular bridge forming factor [Source:HGNC Symbol;Acc:HGNC:11737]	protein_coding	GO:0005524,GO:0005515,GO:0006468,GO:0004672,GO:0007094,GO:0007140,GO:0008608,GO:0043063,GO:0051306,GO:0030496,GO:0000776,GO:0019901,GO:1990830,GO:0007094,GO:0007140,GO:0045171,GO:0008608,GO:0032091,GO:0032466,GO:0043063,GO:0051306	ATP binding,protein binding,protein phosphorylation,protein kinase activity,mitotic spindle assembly checkpoint signaling,male meiotic nuclear division,attachment of spindle microtubules to kinetochore,intercellular bridge organization,mitotic sister chromatid separation,midbody,kinetochore,protein kinase binding,cellular response to leukemia inhibitory factor,mitotic spindle assembly checkpoint …	1.48648	5.149	26.9936	0.0003396	0.127798	1
ENSCAFG00845031074	PARP12	482770	poly(ADP-ribose) polymerase family member 12 [Source:HGNC Symbol;Acc:HGNC:21919]	protein_coding	GO:0046872,GO:0003950,GO:1990404,GO:0070213,GO:0140289	metal ion binding,NAD+ ADP-ribosyltransferase activity,protein ADP-ribosylase activity,protein auto-ADP-ribosylation,protein mono-ADP-ribosylation	1.4066	6.19379	25.6204	0.000415848	0.144516	1
ENSCAFG00845027704		609654		protein_coding	GO:0051607	defense response to virus	2.62262	5.78412	25.5315	0.000421454	0.144516	1
ENSCAFG00845005580		NA		protein_coding	GO:0016020,GO:0005525	membrane,GTP binding	2.48049	4.32813	25.1143	0.000448985	0.147325	1
ENSCAFG00845020346	TRAFD1	477484	TRAF-type zinc finger domain containing 1 [Source:HGNC Symbol;Acc:HGNC:24808]	protein_coding	GO:0045824	negative regulation of innate immune response	0.998046	7.03762	24.3	0.000509166	0.149001	1
ENSCAFG00845013903		NA		lncRNA			2.35507	1.48062	23.2795	0.000598723	0.149001	1
ENSCAFG00845030220		NA		lncRNA			2.25473	-0.934686	22.983	0.000628195	0.149518	1
ENSCAFG00845001277	IL12B	403976	interleukin 12B [Source:NCBI gene (formerly Entrezgene);Acc:403976]	protein_coding	GO:0005515,GO:0016020,GO:0004896,GO:0005125,GO:0005126,GO:0008083,GO:0042164,GO:0042802,GO:0045519,GO:0046982,GO:0001916,GO:0002230,GO:0002827,GO:0002860,GO:0002862,GO:0007166,GO:0008283,GO:0010033,GO:0010224,GO:0010536,GO:0016477,GO:0030101,GO:0032693,GO:0032700,GO:0032725,GO:0032729,GO:0032733,GO:0032735,GO:0032740,GO:0032760,GO:0032816,GO:0032819,GO:0032946,GO:0034393,GO:0042093,GO:0042102,GO:…	protein binding,membrane,cytokine receptor activity,cytokine activity,cytokine receptor binding,growth factor activity,interleukin-12 alpha subunit binding,identical protein binding,interleukin-23 receptor binding,protein heterodimerization activity,positive regulation of T cell mediated cytotoxicity,positive regulation of defense response to virus by host,positive regulation of T-helper 1 type i…	2.90568	1.41123	22.0885	0.000728151	0.15448	1
ENSCAFG00845005769	IFGGB2	481470	interferon-inducible GTPase 1-like [Source:NCBI gene (formerly Entrezgene);Acc:481470]	protein_coding	GO:0016020,GO:0005525	membrane,GTP binding	2.87912	6.21526	21.7372	0.000772526	0.15448	1
ENSCAFG00845018127	GBP1,GBP1	490172,490170	guanylate binding protein 1 [Source:HGNC Symbol;Acc:HGNC:4182],guanylate binding protein 1 [Source:HGNC Symbol;Acc:HGNC:4182]	protein_coding,protein_coding	GO:0005525,GO:0003924,GO:0003779,GO:0019003,GO:0019899,GO:0019955,GO:0030507,GO:0042802,GO:0042803,GO:0051879,GO:0032703,GO:0050848,GO:0050860,GO:0070373,GO:0071346,GO:0071347,GO:0071356,GO:0072665,GO:1900025,GO:1903076,GO:1903077,GO:0005737,GO:0005794,GO:0005829,GO:0012506,GO:0015629	GTP binding,GTPase activity,actin binding,GDP binding,enzyme binding,cytokine binding,spectrin binding,identical protein binding,protein homodimerization activity,Hsp90 protein binding,negative regulation of interleukin-2 production,regulation of calcium-mediated signaling,negative regulation of T cell receptor signaling pathway,negative regulation of ERK1 and ERK2 cascade,cellular response to in…	3.0133	6.32312	21.5143	0.000802355	0.15448	1
ENSCAFG00845014266	ADAR	100855668	adenosine deaminase RNA specific [Source:HGNC Symbol;Acc:HGNC:225]	protein_coding	GO:0003723,GO:0006396,GO:0003726,GO:0004000,GO:0005634,GO:0009615,GO:0005737,GO:0098586,GO:0005654,GO:0043066,GO:0005730,GO:0030218,GO:0002244,GO:0031054,GO:0061484,GO:0045070,GO:0045070,GO:0001649,GO:0035196,GO:0002566,GO:0016553,GO:0035280,GO:0060216,GO:0060339,GO:1900369,GO:0003726,GO:0006382,GO:0035455,GO:0044387,GO:0044387,GO:0044530	RNA binding,RNA processing,double-stranded RNA adenosine deaminase activity,adenosine deaminase activity,nucleus,response to virus,cytoplasm,cellular response to virus,nucleoplasm,negative regulation of apoptotic process,nucleolus,erythrocyte differentiation,hematopoietic progenitor cell differentiation,pre-miRNA processing,hematopoietic stem cell homeostasis,positive regulation of viral genome r…	0.922729	7.21395	20.9354	0.000886464	0.15448	1
ENSCAFG00845020818	SP100	477402	SP100 nuclear antigen [Source:HGNC Symbol;Acc:HGNC:11206]	protein_coding	GO:0003677,GO:0005634,GO:0005515,GO:0005737,GO:0000723,GO:0010596,GO:0005654,GO:0005634,GO:0016604,GO:0000122,GO:0019904,GO:0070087,GO:0045765,GO:0045893,GO:0000981,GO:0043433,GO:0016605,GO:0042802,GO:0019900,GO:1902044,GO:0034341,GO:1902041,GO:0030870,GO:0046983,GO:0006978,GO:0034340,GO:0043392,GO:0045185,GO:0046826,GO:0051271	DNA binding,nucleus,protein binding,cytoplasm,telomere maintenance,negative regulation of endothelial cell migration,nucleoplasm,nucleus,nuclear body,negative regulation of transcription by RNA polymerase II,protein domain specific binding,chromo shadow domain binding,regulation of angiogenesis,positive regulation of transcription, DNA-templated,DNA-binding transcription factor activity, RNA poly…	1.3678	7.37509	20.7315	0.000918579	0.15448	1
ENSCAFG00845005544		NA		protein_coding	GO:0006352,GO:0046982	DNA-templated transcription, initiation,protein heterodimerization activity	1.44314	8.58007	20.2825	0.000994284	0.15448	1
ENSCAFG00845014596	LGALS9	442861	galectin 9 [Source:NCBI gene (formerly Entrezgene);Acc:442861]	protein_coding	GO:0030246	carbohydrate binding	1.86663	6.52787	19.6378	0.00111646	0.15448	1
ENSCAFG00845001861		479183		protein_coding	GO:0005515,GO:0035457	protein binding,cellular response to interferon-alpha	2.73418	3.45702	19.6365	0.00111673	0.15448	1
ENSCAFG00845006373	IFI35	490954	interferon induced protein 35 [Source:HGNC Symbol;Acc:HGNC:5399]	protein_coding	GO:0042802,GO:0002281,GO:0008285,GO:0034145,GO:0045089,GO:0050729,GO:1901223,GO:1901224,GO:0005615,GO:0005634,GO:0005737,GO:0005829,GO:0016020	identical protein binding,macrophage activation involved in immune response,negative regulation of cell population proliferation,positive regulation of toll-like receptor 4 signaling pathway,positive regulation of innate immune response,positive regulation of inflammatory response,negative regulation of NIK/NF-kappaB signaling,positive regulation of NIK/NF-kappaB signaling,extracellular space,nuc…	1.39147	3.89961	18.9787	0.00126033	0.15448	1
ENSCAFG00845018353	PSMB8,PSMB8	474866,474865	proteasome 20S subunit beta 8 [Source:NCBI gene (formerly Entrezgene);Acc:474865],proteasome 20S subunit beta 8 [Source:NCBI gene (formerly Entrezgene);Acc:474865]	protein_coding,protein_coding	GO:0004298,GO:0051603,GO:0005839,GO:0000502,GO:0016021,GO:0005524,GO:0016020,GO:0055085,GO:0030176,GO:0042287,GO:0042825,GO:1904680,GO:0015833,GO:0015433,GO:0046979,GO:0002479,GO:0005524,GO:0016021,GO:0030176,GO:0140359,GO:0005783,GO:0006952,GO:0034451,GO:0043531,GO:0042605,GO:0042824,GO:0015433,GO:0023029,GO:0042288,GO:0046979,GO:1904680,GO:0015833,GO:0019885,GO:0046967,GO:0042825	threonine-type endopeptidase activity,proteolysis involved in cellular protein catabolic process,proteasome core complex,proteasome complex,integral component of membrane,ATP binding,membrane,transmembrane transport,integral component of endoplasmic reticulum membrane,MHC protein binding,TAP complex,peptide transmembrane transporter activity,peptide transport,ABC-type peptide antigen transporter …	1.63529	6.77557	17.8708	0.00155538	0.15448	1
ENSCAFG00845013471	ADAP2	610782	ArfGAP with dual PH domains 2 [Source:HGNC Symbol;Acc:HGNC:16487]	protein_coding	GO:0005096,GO:0043547,GO:1902936,GO:0005737,GO:0005886,GO:0005547,GO:0007507,GO:0043533,GO:0048017	GTPase activator activity,positive regulation of GTPase activity,phosphatidylinositol bisphosphate binding,cytoplasm,plasma membrane,phosphatidylinositol-3,4,5-trisphosphate binding,heart development,inositol 1,3,4,5 tetrakisphosphate binding,inositol lipid-mediated signaling	1.47168	4.76162	16.9929	0.00184908	0.15448	1
ENSCAFG00845014278	TDRD7	474770	tudor domain containing 7 [Source:HGNC Symbol;Acc:HGNC:30831]	protein_coding	GO:0003729,GO:0002089,GO:0010608,GO:0070306,GO:0035770	mRNA binding,lens morphogenesis in camera-type eye,posttranscriptional regulation of gene expression,lens fiber cell differentiation,ribonucleoprotein granule	1.16871	6.64409	16.5645	0.00201623	0.15448	1
ENSCAFG00845016166	CYRIA	475673	CYFIP related Rac1 interactor A [Source:HGNC Symbol;Acc:HGNC:25373]	protein_coding	GO:0030833,GO:0031267	regulation of actin filament polymerization,small GTPase binding	1.24979	7.20004	16.5455	0.00202405	0.15448	1
ENSCAFG00845014055	,	481722,481720	,	protein_coding,protein_coding	GO:0005524,GO:0003723,GO:0003676,GO:0003724,GO:0006401,GO:0005576,GO:0005515,GO:0005615,GO:0004866	ATP binding,RNA binding,nucleic acid binding,RNA helicase activity,RNA catabolic process,extracellular region,protein binding,extracellular space,endopeptidase inhibitor activity	1.39638	6.98242	15.7666	0.00237836	0.15448	1
ENSCAFG00845027232	APAF1	482620	apoptotic peptidase activating factor 1 [Source:HGNC Symbol;Acc:HGNC:576]	protein_coding	GO:0042981,GO:0043531,GO:0005515,GO:0097190,GO:0043293,GO:0008656,GO:0042802,GO:0001843,GO:0006919,GO:0007420,GO:0008635,GO:0030900,GO:0051402,GO:0070059,GO:1902510,GO:2001235,GO:0005634,GO:0005829,GO:0032991	regulation of apoptotic process,ADP binding,protein binding,apoptotic signaling pathway,apoptosome,cysteine-type endopeptidase activator activity involved in apoptotic process,identical protein binding,neural tube closure,activation of cysteine-type endopeptidase activity involved in apoptotic process,brain development,activation of cysteine-type endopeptidase activity involved in apoptotic proce…	0.906099	6.58369	15.275	0.00264026	0.15448	1
ENSCAFG00845005740	ZC3HAV1	100856206	zinc finger CCCH-type containing, antiviral 1 [Source:HGNC Symbol;Acc:HGNC:23721]	protein_coding	GO:0046872,GO:0003950,GO:0009615,GO:0045071,GO:0061014,GO:0005829	metal ion binding,NAD+ ADP-ribosyltransferase activity,response to virus,negative regulation of viral genome replication,positive regulation of mRNA catabolic process,cytosol	0.839582	7.36777	15.1026	0.00274019	0.15448	1
ENSCAFG00845008098	STAT2	481111	signal transducer and activator of transcription 2 [Source:HGNC Symbol;Acc:HGNC:11363]	protein_coding	GO:0003677,GO:0006355,GO:0007165,GO:0003700,GO:0051607,GO:0001932,GO:0005829,GO:0005886,GO:0042802,GO:0060339,GO:0044389,GO:0060337,GO:0090140	DNA binding,regulation of transcription, DNA-templated,signal transduction,DNA-binding transcription factor activity,defense response to virus,regulation of protein phosphorylation,cytosol,plasma membrane,identical protein binding,negative regulation of type I interferon-mediated signaling pathway,ubiquitin-like protein ligase binding,type I interferon signaling pathway,regulation of mitochondria…	0.974632	6.60224	14.8376	0.00290267	0.15448	1
ENSCAFG00845010970	ITGAD,ITGAD	489930,489929	integrin subunit alpha D [Source:NCBI gene (formerly Entrezgene);Acc:489930],integrin subunit alpha D [Source:NCBI gene (formerly Entrezgene);Acc:489930]	protein_coding,protein_coding	GO:0007155,GO:0008305	cell adhesion,integrin complex	2.67517	6.21779	14.6709	0.00301085	0.15448	1
ENSCAFG00845004220	RNASEL	490310	ribonuclease L [Source:NCBI gene (formerly Entrezgene);Acc:490310]	protein_coding	GO:0005524,GO:0005515,GO:0006468,GO:0004672,GO:0004540,GO:0006397,GO:0003723,GO:0045944,GO:0046326,GO:0043488,GO:0045444,GO:0043021,GO:0045071,GO:0051607	ATP binding,protein binding,protein phosphorylation,protein kinase activity,ribonuclease activity,mRNA processing,RNA binding,positive regulation of transcription by RNA polymerase II,positive regulation of glucose import,regulation of mRNA stability,fat cell differentiation,ribonucleoprotein complex binding,negative regulation of viral genome replication,defense response to virus	1.26324	6.78844	14.6322	0.00303662	0.15448	1
ENSCAFG00845030710	PARP11	477722	poly(ADP-ribose) polymerase family member 11 [Source:HGNC Symbol;Acc:HGNC:1186]	protein_coding	GO:0003950,GO:1990404,GO:0006998,GO:0070213,GO:0140289,GO:0005635,GO:0005654,GO:0005829,GO:0016604	NAD+ ADP-ribosyltransferase activity,protein ADP-ribosylase activity,nuclear envelope organization,protein auto-ADP-ribosylation,protein mono-ADP-ribosylation,nuclear envelope,nucleoplasm,cytosol,nuclear body	0.929827	6.15544	14.4379	0.00317017	0.15448	1
ENSCAFG00845014066	CDCA2	477377	cell division cycle associated 2 [Source:HGNC Symbol;Acc:HGNC:14623]	protein_coding	GO:0051301,GO:0035307,GO:0005829,GO:0005654,GO:0035307,GO:0005694	cell division,positive regulation of protein dephosphorylation,cytosol,nucleoplasm,positive regulation of protein dephosphorylation,chromosome	1.62062	2.6016	14.4264	0.00317831	0.15448	1
ENSCAFG00845013888		NA		protein_coding			2.53565	2.9531	14.0333	0.00347149	0.15448	1
ENSCAFG00845029242	KIF4A	491941	kinesin family member 4A [Source:HGNC Symbol;Acc:HGNC:13339]	protein_coding	GO:0005524,GO:0008017,GO:0003777,GO:0007018,GO:1990939,GO:0000281,GO:0051256,GO:0005654,GO:0030496	ATP binding,microtubule binding,microtubule motor activity,microtubule-based movement,ATP-dependent microtubule motor activity,mitotic cytokinesis,mitotic spindle midzone assembly,nucleoplasm,midbody	1.4905	3.94148	13.6801	0.00376284	0.15448	1
ENSCAFG00845004909	RINL	484520	Ras and Rab interactor like [Source:HGNC Symbol;Acc:HGNC:24795]	protein_coding	GO:0005085,GO:0015629,GO:0006897,GO:0001726	guanyl-nucleotide exchange factor activity,actin cytoskeleton,endocytosis,ruffle	1.34186	1.78079	13.6398	0.00379797	0.15448	1
ENSCAFG00845014534	NCAPG2	475559	non-SMC condensin II complex subunit G2 [Source:HGNC Symbol;Acc:HGNC:21904]	protein_coding	GO:0005634,GO:0005654,GO:0005634,GO:0016607,GO:0001833,GO:0030218,GO:0035064,GO:0000796,GO:0043425,GO:0006366,GO:0030293,GO:0035033	nucleus,nucleoplasm,nucleus,nuclear speck,inner cell mass cell proliferation,erythrocyte differentiation,methylated histone binding,condensin complex,bHLH transcription factor binding,transcription by RNA polymerase II,transmembrane receptor protein tyrosine kinase inhibitor activity,histone deacetylase regulator activity	1.37161	3.5132	13.4971	0.00392527	0.15448	1
ENSCAFG00845028130		100686578		protein_coding	GO:0005515	protein binding	2.29829	5.89107	13.3161	0.0040943	0.15448	1
ENSCAFG00845020523	DNASE1L3	476576	deoxyribonuclease 1 like 3 [Source:HGNC Symbol;Acc:HGNC:2959]	protein_coding	GO:0003824,GO:0004536,GO:0006308,GO:0004519,GO:0000737,GO:0002283,GO:0002673,GO:0006309,GO:0010623,GO:0070948,GO:0005634,GO:0005783	catalytic activity,deoxyribonuclease activity,DNA catabolic process,endonuclease activity,DNA catabolic process, endonucleolytic,neutrophil activation involved in immune response,regulation of acute inflammatory response,apoptotic DNA fragmentation,programmed cell death involved in cell development,regulation of neutrophil mediated cytotoxicity,nucleus,endoplasmic reticulum	2.71452	1.71958	13.227	0.00418067	0.15448	1
ENSCAFG00845002371	CSF1	611795	colony stimulating factor 1 [Source:HGNC Symbol;Acc:HGNC:2432]	protein_coding	GO:0016021,GO:0008083,GO:0005125,GO:0005615,GO:0030316,GO:0005886,GO:0042802,GO:0016604,GO:0010628,GO:0030278,GO:0042803,GO:0042803,GO:0008284,GO:0048471,GO:0032270,GO:1901215,GO:0030335,GO:0048873,GO:0001954,GO:0002158,GO:0040018,GO:0042488,GO:0045651,GO:0045657,GO:0045672,GO:0045860,GO:0046579,GO:0060444,GO:0060611,GO:0060763,GO:0005125,GO:0005157,GO:0008083,GO:0002931,GO:0003006,GO:0007169,GO:…	integral component of membrane,growth factor activity,cytokine activity,extracellular space,osteoclast differentiation,plasma membrane,identical protein binding,nuclear body,positive regulation of gene expression,regulation of ossification,protein homodimerization activity,protein homodimerization activity,positive regulation of cell population proliferation,perinuclear region of cytoplasm,positi…	1.71222	6.07207	12.9986	0.00441222	0.15448	1
ENSCAFG00845005739	NBR1	490951	transmembrane protein 106A [Source:HGNC Symbol;Acc:HGNC:28288]	protein_coding	GO:0032731,GO:0032755,GO:0032760,GO:0035780,GO:0035781,GO:0042116,GO:0043123,GO:0043410,GO:0045348,GO:1904407,GO:0005886	positive regulation of interleukin-1 beta production,positive regulation of interleukin-6 production,positive regulation of tumor necrosis factor production,CD80 biosynthetic process,CD86 biosynthetic process,macrophage activation,positive regulation of I-kappaB kinase/NF-kappaB signaling,positive regulation of MAPK cascade,positive regulation of MHC class II biosynthetic process,positive regulat…	1.41858	4.00822	12.9553	0.00445777	0.15448	1
ENSCAFG00845014873	ADAMDEC1	608742	ADAM like decysin 1 [Source:HGNC Symbol;Acc:HGNC:16299]	protein_coding	GO:0006508,GO:0008237,GO:0004222	proteolysis,metallopeptidase activity,metalloendopeptidase activity	3.79966	4.19099	12.9105	0.00450563	0.15448	1
ENSCAFG00845006226	DUSP2	611653	dual specificity phosphatase 2 [Source:HGNC Symbol;Acc:HGNC:3068]	protein_coding	GO:0016791,GO:0004725,GO:0006470,GO:0008138,GO:0016311,GO:0017017,GO:0005654,GO:0031965,GO:0006470,GO:0004721,GO:0051019	phosphatase activity,protein tyrosine phosphatase activity,protein dephosphorylation,protein tyrosine/serine/threonine phosphatase activity,dephosphorylation,MAP kinase tyrosine/serine/threonine phosphatase activity,nucleoplasm,nuclear membrane,protein dephosphorylation,phosphoprotein phosphatase activity,mitogen-activated protein kinase binding	2.17214	3.14951	12.8999	0.00451697	0.15448	1
ENSCAFG00845026832	SAMHD1	485862	SAM and HD domain containing deoxynucleoside triphosphate triphosphohydrolase 1 [Source:HGNC Symbol;Acc:HGNC:15925]	protein_coding	GO:0005515,GO:0003676,GO:0003697,GO:0003723,GO:0004540,GO:0008270,GO:0008832,GO:0016793,GO:0032567,GO:0042802,GO:0000724,GO:0006203,GO:0006974,GO:0009264,GO:0016446,GO:0045088,GO:0046061,GO:0051289,GO:0051607,GO:0060339,GO:0110025,GO:0005634,GO:0005654,GO:0005886,GO:0035861,GO:0097197	protein binding,nucleic acid binding,single-stranded DNA binding,RNA binding,ribonuclease activity,zinc ion binding,dGTPase activity,triphosphoric monoester hydrolase activity,dGTP binding,identical protein binding,double-strand break repair via homologous recombination,dGTP catabolic process,cellular response to DNA damage stimulus,deoxyribonucleotide catabolic process,somatic hypermutation of i…	1.97599	6.77239	12.8733	0.00454567	0.15448	1
ENSCAFG00845017879	TAP2,TAP2	607786,474864	major histocompatibility complex, class II, DO beta [Source:NCBI gene (formerly Entrezgene);Acc:607786],major histocompatibility complex, class II, DO beta [Source:NCBI gene (formerly Entrezgene);Acc:607786]	protein_coding,protein_coding	GO:0016021,GO:0005524,GO:0016020,GO:0055085,GO:0030176,GO:0015440,GO:0042287,GO:0019885,GO:0042825,GO:1904680,GO:0015833,GO:0140359,GO:0006955,GO:0019882,GO:0042613,GO:0001916,GO:0002237,GO:0002481,GO:0002485,GO:0002489,GO:0046978	integral component of membrane,ATP binding,membrane,transmembrane transport,integral component of endoplasmic reticulum membrane,ABC-type peptide transporter activity,MHC protein binding,antigen processing and presentation of endogenous peptide antigen via MHC class I,TAP complex,peptide transmembrane transporter activity,peptide transport,ABC-type transporter activity,immune response,antigen pro…	0.966112	5.54341	12.7959	0.00463065	0.15448	1
ENSCAFG00845000482	CASP12	479458	caspase 12 [Source:NCBI gene (formerly Entrezgene);Acc:479458]	protein_coding	GO:0006508,GO:0008234,GO:0004197	proteolysis,cysteine-type peptidase activity,cysteine-type endopeptidase activity	2.09806	4.78314	12.7515	0.00468014	0.15448	1
ENSCAFG00845025956	ECT2	488172	epithelial cell transforming 2 [Source:HGNC Symbol;Acc:HGNC:3155]	protein_coding	GO:0005634,GO:0005737,GO:0005085,GO:0005096,GO:0035556,GO:0043547,GO:2000431,GO:0005737,GO:0005634,GO:0005085,GO:0005096,GO:0005923,GO:0030496,GO:0032154,GO:0042803,GO:0043065,GO:0070830,GO:0000281,GO:0071277,GO:0043547,GO:0005911,GO:0032467,GO:0051988,GO:0072686,GO:0071479,GO:0070301,GO:0005829,GO:0005654,GO:0016604,GO:0051260,GO:0042307,GO:0000902,GO:0031267,GO:0090630,GO:0045666,GO:0045859,GO:…	nucleus,cytoplasm,guanyl-nucleotide exchange factor activity,GTPase activator activity,intracellular signal transduction,positive regulation of GTPase activity,regulation of cytokinesis, actomyosin contractile ring assembly,cytoplasm,nucleus,guanyl-nucleotide exchange factor activity,GTPase activator activity,bicellular tight junction,midbody,cleavage furrow,protein homodimerization activity,posi…	1.35935	3.89044	12.7198	0.00471598	0.15448	1
ENSCAFG00845023939	DTX3L	478586	deltex E3 ubiquitin ligase 3L [Source:HGNC Symbol;Acc:HGNC:30323]	protein_coding	GO:0016567,GO:0007219,GO:0004842,GO:0004857,GO:0008047,GO:0019899,GO:0042393,GO:0044389,GO:0097677,GO:0002230,GO:0006302,GO:0006511,GO:0006974,GO:0008333,GO:0010390,GO:0032092,GO:0033522,GO:0033523,GO:0035563,GO:0045893,GO:0051444,GO:0051865,GO:0070936,GO:1900182,GO:1901666,GO:1902966,GO:2000646,GO:2001034,GO:0005634,GO:0005654,GO:0005737,GO:0005764,GO:0005769,GO:0005829,GO:0032991	protein ubiquitination,Notch signaling pathway,ubiquitin-protein transferase activity,enzyme inhibitor activity,enzyme activator activity,enzyme binding,histone binding,ubiquitin-like protein ligase binding,STAT family protein binding,positive regulation of defense response to virus by host,double-strand break repair,ubiquitin-dependent protein catabolic process,cellular response to DNA damage st…	1.4692	5.83516	12.711	0.00472591	0.15448	1
ENSCAFG00845017796		490169		protein_coding	GO:0005525,GO:0003924	GTP binding,GTPase activity	2.80235	5.35448	12.6336	0.00481489	0.15448	1
ENSCAFG00845004137	GPR158	477984	G protein-coupled receptor 158 [Source:HGNC Symbol;Acc:HGNC:23689]	protein_coding	GO:0007186,GO:0016021,GO:0004930,GO:0016020,GO:0007186,GO:0072659	G protein-coupled receptor signaling pathway,integral component of membrane,G protein-coupled receptor activity,membrane,G protein-coupled receptor signaling pathway,protein localization to plasma membrane	2.35247	3.87402	12.6018	0.00485208	0.15448	1
ENSCAFG00845005325		NA		lncRNA			2.33462	-3.00519	12.5182	0.00495128	0.15448	1
ENSCAFG00845000510	LAP3	479081	leucine aminopeptidase 3 [Source:HGNC Symbol;Acc:HGNC:18449]	protein_coding	GO:0030145,GO:0005737,GO:0006508,GO:0070006,GO:0019538,GO:0008233,GO:0005654,GO:0005829,GO:0030496	manganese ion binding,cytoplasm,proteolysis,metalloaminopeptidase activity,protein metabolic process,peptidase activity,nucleoplasm,cytosol,midbody	1.22244	6.30749	12.476	0.00500229	0.15448	1
ENSCAFG00845001752	CENPF	480027	centromere protein F [Source:HGNC Symbol;Acc:HGNC:1857]	protein_coding	GO:0042803,GO:0008017,GO:0008134,GO:0000775,GO:0070840,GO:0005737,GO:0005634,GO:0015031,GO:0005635,GO:0005819,GO:0070840,GO:0000922,GO:0000278,GO:0016363,GO:0007059,GO:0030496,GO:0000776,GO:0042803,GO:0001822,GO:0097539,GO:0045892,GO:0005654,GO:0008022,GO:0140297,GO:0051310,GO:0000940,GO:0010389,GO:0021591,GO:0000775	protein homodimerization activity,microtubule binding,transcription factor binding,chromosome, centromeric region,dynein complex binding,cytoplasm,nucleus,protein transport,nuclear envelope,spindle,dynein complex binding,spindle pole,mitotic cell cycle,nuclear matrix,chromosome segregation,midbody,kinetochore,protein homodimerization activity,kidney development,ciliary transition fiber,negative r…	2.14099	4.42571	12.2536	0.00528178	0.156814	1
ENSCAFG00845025798	GZMA	487207		protein_coding	GO:0006508,GO:0004252	proteolysis,serine-type endopeptidase activity	4.29965	2.45033	12.2348	0.00530631	0.156814	1
ENSCAFG00845024135	PARP15	608662	poly(ADP-ribose) polymerase family member 15 [Source:HGNC Symbol;Acc:HGNC:26876]	protein_coding	GO:0003950,GO:0000122,GO:0003950,GO:0070403,GO:0003714,GO:1990404,GO:0140289,GO:0070212	NAD+ ADP-ribosyltransferase activity,negative regulation of transcription by RNA polymerase II,NAD+ ADP-ribosyltransferase activity,NAD+ binding,transcription corepressor activity,protein ADP-ribosylase activity,protein mono-ADP-ribosylation,protein poly-ADP-ribosylation	1.17242	6.80915	12.1331	0.00544099	0.157957	1
ENSCAFG00845000375	CASP4	403724	caspase 4, apoptosis-related cysteine peptidase [Source:NCBI gene (formerly Entrezgene);Acc:403724]	protein_coding	GO:0042981,GO:0006508,GO:0008234,GO:0004197	regulation of apoptotic process,proteolysis,cysteine-type peptidase activity,cysteine-type endopeptidase activity	2.80328	6.12685	11.9942	0.00563178	0.158294	1
ENSCAFG00845001554	C5orf34	612464	chromosome 5 open reading frame 34 [Source:HGNC Symbol;Acc:HGNC:24738]	protein_coding			1.6724	0.382149	11.9205	0.00573623	0.158538	1
ENSCAFG00845021665	KIF14	490248	kinesin family member 14 [Source:HGNC Symbol;Acc:HGNC:19181]	protein_coding	GO:0005524,GO:0005515,GO:0008017,GO:0003777,GO:0007018,GO:0005524,GO:1990939,GO:0005886,GO:0051301,GO:0016887,GO:0043161,GO:0030496,GO:0008017,GO:0019901,GO:0008284,GO:0031146,GO:0043066,GO:0043524,GO:0032467,GO:0051233,GO:0005829,GO:0007080,GO:0032487,GO:0005874,GO:0030334,GO:0010389,GO:0021987,GO:0001558,GO:0034446,GO:0031641,GO:0015631,GO:2000045,GO:0045184,GO:0021766,GO:0030165,GO:0030155,GO:…	ATP binding,protein binding,microtubule binding,microtubule motor activity,microtubule-based movement,ATP binding,ATP-dependent microtubule motor activity,plasma membrane,cell division,ATPase,proteasome-mediated ubiquitin-dependent protein catabolic process,midbody,microtubule binding,protein kinase binding,positive regulation of cell population proliferation,SCF-dependent proteasomal ubiquitin-d…	1.66805	3.03944	11.8551	0.00583085	0.159196	1
ENSCAFG00845009329	TTK	481895	TTK protein kinase [Source:HGNC Symbol;Acc:HGNC:12401]	protein_coding	GO:0005524,GO:0005515,GO:0006468,GO:0004672,GO:0007093,GO:0004712,GO:0051304,GO:0042802,GO:0046777,GO:0018108,GO:0005737,GO:0034502,GO:0018105,GO:0018107,GO:0000776,GO:0004712,GO:0034501,GO:0016321,GO:0033316,GO:1903096,GO:0043515,GO:0007094	ATP binding,protein binding,protein phosphorylation,protein kinase activity,mitotic cell cycle checkpoint signaling,protein serine/threonine/tyrosine kinase activity,chromosome separation,identical protein binding,protein autophosphorylation,peptidyl-tyrosine phosphorylation,cytoplasm,protein localization to chromosome,peptidyl-serine phosphorylation,peptidyl-threonine phosphorylation,kinetochore…	1.78076	2.57679	11.7742	0.00595058	0.159543	1
ENSCAFG00845017593		NA		protein_coding	GO:0007165	signal transduction	1.85699	-0.635252	11.7351	0.00600934	0.159543	1
ENSCAFG00845013811		NA		protein_coding			2.02893	0.977677	11.7146	0.00604062	0.159543	1
ENSCAFG00845020645	SERPING1	475966	serpin family G member 1 [Source:HGNC Symbol;Acc:HGNC:1228]	protein_coding	GO:0005615,GO:0004867,GO:0030193,GO:0045916,GO:0004867,GO:0005615,GO:0001869	extracellular space,serine-type endopeptidase inhibitor activity,regulation of blood coagulation,negative regulation of complement activation,serine-type endopeptidase inhibitor activity,extracellular space,negative regulation of complement activation, lectin pathway	0.961077	6.39834	11.6834	0.00608828	0.159545	1
ENSCAFG00845015279	GSDMD	609395	gasdermin D [Source:HGNC Symbol;Acc:HGNC:25697]	protein_coding	GO:0005886,GO:0005615,GO:0005829,GO:0005546,GO:0032731,GO:0005654,GO:0050829,GO:0051260,GO:0050830,GO:0001786,GO:0072559,GO:0070269,GO:0031668,GO:0070300,GO:0070273,GO:1901612,GO:0035915,GO:0046931	plasma membrane,extracellular space,cytosol,phosphatidylinositol-4,5-bisphosphate binding,positive regulation of interleukin-1 beta production,nucleoplasm,defense response to Gram-negative bacterium,protein homooligomerization,defense response to Gram-positive bacterium,phosphatidylserine binding,NLRP3 inflammasome complex,pyroptosis,cellular response to extracellular stimulus,phosphatidic acid b…	1.02724	4.26953	11.5475	0.00630188	0.161082	1
ENSCAFG00845028671		NA		lncRNA			4.24125	-2.37065	11.5109	0.00636089	0.161101	1
ENSCAFG00845000006		NA		lncRNA			4.90635	2.48568	11.4329	0.00648886	0.161635	1
ENSCAFG00845020946	ADTRP	478722	androgen dependent TFPI regulating protein [Source:HGNC Symbol;Acc:HGNC:21214]	protein_coding	GO:0016021,GO:0016787,GO:0001934,GO:0002042,GO:0002686,GO:0003332,GO:0010628,GO:0030195,GO:0042758,GO:0043491,GO:0050709,GO:0071383,GO:0140052,GO:1903038,GO:2000402,GO:0005901,GO:0009986,GO:0016020	integral component of membrane,hydrolase activity,positive regulation of protein phosphorylation,cell migration involved in sprouting angiogenesis,negative regulation of leukocyte migration,negative regulation of extracellular matrix constituent secretion,positive regulation of gene expression,negative regulation of blood coagulation,long-chain fatty acid catabolic process,protein kinase B signal…	1.61739	0.359554	11.4105	0.00652615	0.161635	1
ENSCAFG00845030186		477518		protein_coding	GO:0005515,GO:0016779,GO:0003725,GO:0051607,GO:0001730,GO:0006164,GO:0003725,GO:0070106,GO:0001730	protein binding,nucleotidyltransferase activity,double-stranded RNA binding,defense response to virus,2'-5'-oligoadenylate synthetase activity,purine nucleotide biosynthetic process,double-stranded RNA binding,interleukin-27-mediated signaling pathway,2'-5'-oligoadenylate synthetase activity	1.10701	4.85257	11.1966	0.00689598	0.164825	1
ENSCAFG00845014565	CLSPN	482481	claspin [Source:HGNC Symbol;Acc:HGNC:19715]	protein_coding	GO:0000217,GO:0010997,GO:0000076,GO:0000077,GO:0007095,GO:0018105,GO:0032147,GO:0033314,GO:0005634,GO:0005654,GO:0005794	DNA secondary structure binding,anaphase-promoting complex binding,DNA replication checkpoint signaling,DNA damage checkpoint signaling,mitotic G2 DNA damage checkpoint signaling,peptidyl-serine phosphorylation,activation of protein kinase activity,mitotic DNA replication checkpoint signaling,nucleus,nucleoplasm,Golgi apparatus	1.68577	1.39771	11.1612	0.00695957	0.164825	1
ENSCAFG00845008276	FANCD2	484659	FA complementation group D2 [Source:HGNC Symbol;Acc:HGNC:3585]	protein_coding	GO:0006281,GO:0005829,GO:0005654,GO:0005634,GO:0016604,GO:0005730,GO:0007276,GO:0006974,GO:0050727,GO:0007129,GO:0097150,GO:0045589,GO:0051090,GO:2000348,GO:0010332,GO:0000793,GO:0048854,GO:0070182,GO:0034599	DNA repair,cytosol,nucleoplasm,nucleus,nuclear body,nucleolus,gamete generation,cellular response to DNA damage stimulus,regulation of inflammatory response,homologous chromosome pairing at meiosis,neuronal stem cell population maintenance,regulation of regulatory T cell differentiation,regulation of DNA-binding transcription factor activity,regulation of CD40 signaling pathway,response to gamma …	0.940718	3.73568	11.0978	0.00707508	0.164825	1
ENSCAFG00845010482	CSN3	100685434	casein kappa [Source:HGNC Symbol;Acc:HGNC:2446]	protein_coding	GO:0005576,GO:0007595,GO:0050821,GO:0005615	extracellular region,lactation,protein stabilization,extracellular space	3.62014	-2.09859	11.0865	0.00709601	0.164825	1
ENSCAFG00845019219	KIF20A	474693	kinesin family member 20A [Source:HGNC Symbol;Acc:HGNC:9787]	protein_coding	GO:0005524,GO:0005874,GO:0005794,GO:0008017,GO:0003777,GO:0007018,GO:0000281,GO:1990939,GO:0005819,GO:0030496,GO:0019901,GO:0000281,GO:0005654,GO:0061952,GO:0032465,GO:0045171,GO:0001578,GO:0032154	ATP binding,microtubule,Golgi apparatus,microtubule binding,microtubule motor activity,microtubule-based movement,mitotic cytokinesis,ATP-dependent microtubule motor activity,spindle,midbody,protein kinase binding,mitotic cytokinesis,nucleoplasm,midbody abscission,regulation of cytokinesis,intercellular bridge,microtubule bundle formation,cleavage furrow	1.61442	2.30589	11.053	0.00715821	0.164941	1
ENSCAFG00845020239		NA		protein_coding			1.07625	8.54782	11.0125	0.00723443	0.165776	1
ENSCAFG00845021878		485285		protein_coding	GO:0007186,GO:0016021,GO:0004930,GO:0004984	G protein-coupled receptor signaling pathway,integral component of membrane,G protein-coupled receptor activity,olfactory receptor activity	2.41438	1.03448	10.9767	0.00730251	0.165893	1
ENSCAFG00845021758		NA		protein_coding			1.99233	-0.648573	10.8691	0.0075119	0.167046	1
ENSCAFG00845026911	IL12RB2	489550	interleukin 12 receptor subunit beta 2 [Source:NCBI gene (formerly Entrezgene);Acc:489550]	protein_coding	GO:0005515,GO:0032729,GO:0005886	protein binding,positive regulation of interferon-gamma production,plasma membrane	2.25351	4.81212	10.802	0.00764609	0.16731	1
ENSCAFG00845024886	SNAP29	486442	synaptosome associated protein 29 [Source:HGNC Symbol;Acc:HGNC:11133]	protein_coding	GO:0005776,GO:0060271,GO:0005829,GO:0005654,GO:0005737,GO:0005813,GO:0097352,GO:0031201,GO:0016240,GO:0020018	autophagosome,cilium assembly,cytosol,nucleoplasm,cytoplasm,centrosome,autophagosome maturation,SNARE complex,autophagosome membrane docking,ciliary pocket membrane	1.07214	6.26316	10.8019	0.0076462	0.16731	1
ENSCAFG00845013585	DEPDC1	479992	DEP domain containing 1 [Source:HGNC Symbol;Acc:HGNC:22949]	protein_coding	GO:0007165,GO:0035556,GO:0005634,GO:0045892,GO:0017053	signal transduction,intracellular signal transduction,nucleus,negative regulation of transcription, DNA-templated,transcription repressor complex	2.00089	1.65805	10.7957	0.00765892	0.16731	1
ENSCAFG00845025120	C1R	477707	complement C1r [Source:HGNC Symbol;Acc:HGNC:1246]	protein_coding	GO:0006508,GO:0005509,GO:0004252,GO:0006958	proteolysis,calcium ion binding,serine-type endopeptidase activity,complement activation, classical pathway	1.21438	6.36756	10.7213	0.00781133	0.167583	1
ENSCAFG00845009602	CENPK	609707	centromere protein K [Source:HGNC Symbol;Acc:HGNC:29479]	protein_coding	GO:0005634,GO:0051382	nucleus,kinetochore assembly	1.51793	1.79001	10.6129	0.00804006	0.168871	1
ENSCAFG00845014926		NA		protein_coding	GO:0003677,GO:0000786,GO:0046982	DNA binding,nucleosome,protein heterodimerization activity	1.97809	0.973164	10.5968	0.00807478	0.168871	1
ENSCAFG00845020980	FAR1	476863	fatty acyl-CoA reductase 1 [Source:HGNC Symbol;Acc:HGNC:26222]	protein_coding	GO:0080019,GO:0005777,GO:0008611,GO:0005779,GO:0080019,GO:0010025,GO:0035336,GO:0046474	fatty-acyl-CoA reductase (alcohol-forming) activity,peroxisome,ether lipid biosynthetic process,integral component of peroxisomal membrane,fatty-acyl-CoA reductase (alcohol-forming) activity,wax biosynthetic process,long-chain fatty-acyl-CoA metabolic process,glycerophospholipid biosynthetic process	0.789004	7.31439	10.5048	0.00827612	0.169984	1
ENSCAFG00845025423	FCHO1	476673	FCH and mu domain containing endocytic adaptor 1 [Source:HGNC Symbol;Acc:HGNC:29002]	protein_coding	GO:0072583,GO:0035612,GO:0048268,GO:0050852,GO:0050870,GO:0005654,GO:0005829,GO:0005886,GO:0005905	clathrin-dependent endocytosis,AP-2 adaptor complex binding,clathrin coat assembly,T cell receptor signaling pathway,positive regulation of T cell activation,nucleoplasm,cytosol,plasma membrane,clathrin-coated pit	1.29734	2.50074	10.4689	0.0083564	0.170983	1
ENSCAFG00845012425	MELK	481608	maternal embryonic leucine zipper kinase [Source:HGNC Symbol;Acc:HGNC:16870]	protein_coding	GO:0005524,GO:0006468,GO:0004674,GO:0004672,GO:0004715,GO:0005509,GO:0006915,GO:0008283,GO:0008631,GO:0043065,GO:0046777,GO:0061351,GO:0005737,GO:0005886,GO:0005938	ATP binding,protein phosphorylation,protein serine/threonine kinase activity,protein kinase activity,non-membrane spanning protein tyrosine kinase activity,calcium ion binding,apoptotic process,cell population proliferation,intrinsic apoptotic signaling pathway in response to oxidative stress,positive regulation of apoptotic process,protein autophosphorylation,neural precursor cell proliferation,…	1.30464	3.12292	10.4331	0.00843752	0.171404	1
ENSCAFG00845028118	FAM72A	607371		protein_coding			1.82954	0.74722	10.3926	0.00853018	0.171973	1
ENSCAFG00845010605		NA		lncRNA			4.35341	-2.62557	10.3144	0.00871276	0.173655	1
ENSCAFG00845004444	CDKN3	100856636	cyclin dependent kinase inhibitor 3 [Source:HGNC Symbol;Acc:HGNC:1791]	protein_coding	GO:0016791,GO:0004725,GO:0006470,GO:0008138,GO:0016311,GO:0004721,GO:0004722,GO:0051726,GO:0005829,GO:0048471	phosphatase activity,protein tyrosine phosphatase activity,protein dephosphorylation,protein tyrosine/serine/threonine phosphatase activity,dephosphorylation,phosphoprotein phosphatase activity,protein serine/threonine phosphatase activity,regulation of cell cycle,cytosol,perinuclear region of cytoplasm	1.18782	2.34593	10.2567	0.0088505	0.175026	1
ENSCAFG00845021905	OR52H7	485286	olfactory receptor family 52 subfamily H member 7 [Source:NCBI gene (formerly Entrezgene);Acc:485286]	protein_coding	GO:0007186,GO:0016021,GO:0004930,GO:0004984	G protein-coupled receptor signaling pathway,integral component of membrane,G protein-coupled receptor activity,olfactory receptor activity	2.44761	1.2103	10.2352	0.00890228	0.175026	1
ENSCAFG00845010242	IFI6	478170		protein_coding	GO:0016021	integral component of membrane	2.53217	0.560163	10.2039	0.00897859	0.175584	1
ENSCAFG00845000154	OPTN	478003	optineurin [Source:HGNC Symbol;Acc:HGNC:17142]	protein_coding	GO:0005794,GO:0016192,GO:0006914,GO:0031410,GO:0070530,GO:0005794,GO:0031593,GO:0010508,GO:0007030,GO:0034067,GO:0005802,GO:0031267,GO:0034620,GO:0005829,GO:0042802,GO:0030674,GO:0034613,GO:0043124,GO:0008022,GO:0070530,GO:0001920,GO:0043001,GO:0050829,GO:0061734,GO:0090161,GO:1904417,GO:0048471	Golgi apparatus,vesicle-mediated transport,autophagy,cytoplasmic vesicle,K63-linked polyubiquitin modification-dependent protein binding,Golgi apparatus,polyubiquitin modification-dependent protein binding,positive regulation of autophagy,Golgi organization,protein localization to Golgi apparatus,trans-Golgi network,small GTPase binding,cellular response to unfolded protein,cytosol,identical prot…	0.83718	6.31263	10.1729	0.009055	0.175584	1
ENSCAFG00845022821	ZFC3H1	474449	zinc finger C3H1-type containing [Source:HGNC Symbol;Acc:HGNC:28328]	protein_coding	GO:0005515,GO:0006396,GO:0005634,GO:0000178	protein binding,RNA processing,nucleus,exosome (RNase complex)	0.588226	6.89668	9.90335	0.0097529	0.177758	1
ENSCAFG00845001877		NA		lncRNA			2.18826	3.41495	9.8958	0.00977336	0.177892	1
ENSCAFG00845001126	ASPM	480009	assembly factor for spindle microtubules [Source:NCBI gene (formerly Entrezgene);Acc:480009]	protein_coding	GO:0005515,GO:0007051,GO:0005737,GO:0007420,GO:0045665,GO:0001764,GO:0008584,GO:0002052,GO:0007283,GO:0021873,GO:0021987,GO:0045769,GO:0048477,GO:0048589,GO:0051661,GO:0090263,GO:0090306,GO:0097150,GO:0005516,GO:0007051,GO:0051445,GO:0051653,GO:0000922,GO:0005874,GO:0030496,GO:0072687,GO:0097431,GO:0005634,GO:0036449	protein binding,spindle organization,cytoplasm,brain development,negative regulation of neuron differentiation,neuron migration,male gonad development,positive regulation of neuroblast proliferation,spermatogenesis,forebrain neuroblast division,cerebral cortex development,negative regulation of asymmetric cell division,oogenesis,developmental growth,maintenance of centrosome location,positive reg…	1.05439	4.55307	9.84912	0.00990098	0.177892	1
ENSCAFG00845013426	CD5L	609953	CD5 molecule like [Source:NCBI gene (formerly Entrezgene);Acc:609953]	protein_coding	GO:0016020,GO:0005044	membrane,scavenger receptor activity	2.80481	3.33532	9.75013	0.0101783	0.179494	1
ENSCAFG00845026923	CENPE	100855663	centromere protein E [Source:HGNC Symbol;Acc:HGNC:1856]	protein_coding	GO:0005524,GO:0008017,GO:0003777,GO:0007018,GO:1990939,GO:0005634,GO:0005694,GO:0005874,GO:0000278,GO:0007059,GO:0030496,GO:0000776,GO:0008017,GO:0030071,GO:0045860,GO:0007079,GO:0051233,GO:0005829,GO:0005654,GO:0007080,GO:1990023,GO:0003777,GO:0051310,GO:0007052,GO:0015630,GO:0000775,GO:0043515,GO:0051315,GO:0051382,GO:0000779,GO:0005828,GO:0099606,GO:0099607	ATP binding,microtubule binding,microtubule motor activity,microtubule-based movement,ATP-dependent microtubule motor activity,nucleus,chromosome,microtubule,mitotic cell cycle,chromosome segregation,midbody,kinetochore,microtubule binding,regulation of mitotic metaphase/anaphase transition,positive regulation of protein kinase activity,mitotic chromosome movement towards spindle pole,spindle mid…	1.04902	3.96637	9.72391	0.0102533	0.180179	1
ENSCAFG00845004714	IRF9,IRF9	607899,480259	,	protein_coding,protein_coding	GO:0008270,GO:0004842,GO:0071797,GO:0016567,GO:0023035,GO:0043123,GO:0060546,GO:0005829,GO:0009898,GO:0035631,GO:0006355,GO:0005515,GO:0003700,GO:0000976	zinc ion binding,ubiquitin-protein transferase activity,LUBAC complex,protein ubiquitination,CD40 signaling pathway,positive regulation of I-kappaB kinase/NF-kappaB signaling,negative regulation of necroptotic process,cytosol,cytoplasmic side of plasma membrane,CD40 receptor complex,regulation of transcription, DNA-templated,protein binding,DNA-binding transcription factor activity,transcription …	0.706919	6.26796	9.70005	0.0103222	0.180179	1
ENSCAFG00845029094	MARCO	476117	macrophage receptor with collagenous structure [Source:HGNC Symbol;Acc:HGNC:6895]	protein_coding	GO:0016020,GO:0005044,GO:0006897,GO:0043277,GO:0001664	membrane,scavenger receptor activity,endocytosis,apoptotic cell clearance,G protein-coupled receptor binding	2.51632	4.00372	9.69657	0.0103323	0.180179	1
ENSCAFG00845024036	IL12RB1	484828	interleukin 12 receptor subunit beta 1 [Source:HGNC Symbol;Acc:HGNC:5971]	protein_coding	GO:0005515,GO:0032729,GO:0002230,GO:0005143,GO:0016517,GO:0042019,GO:0042020,GO:0002827,GO:0042104,GO:0071346,GO:0042022,GO:0072536	protein binding,positive regulation of interferon-gamma production,positive regulation of defense response to virus by host,interleukin-12 receptor binding,interleukin-12 receptor activity,interleukin-23 binding,interleukin-23 receptor activity,positive regulation of T-helper 1 type immune response,positive regulation of activated T cell proliferation,cellular response to interferon-gamma,interle…	2.77492	2.53537	9.5879	0.0106533	0.18265	1
ENSCAFG00845008965		102156332		protein_coding	GO:0005576,GO:0008289,GO:0006869,GO:0042157	extracellular region,lipid binding,lipid transport,lipoprotein metabolic process	2.16328	3.44834	9.56344	0.0107272	0.183001	1
ENSCAFG00845023377	PTGES	480698	prostaglandin E synthase [Source:NCBI gene (formerly Entrezgene);Acc:480698]	protein_coding	GO:0004364,GO:0004602,GO:0004667,GO:0043295,GO:0050220,GO:0001516,GO:0006693,GO:0008285,GO:0019233,GO:0031620,GO:0032308,GO:0050727,GO:0005641,GO:0005737,GO:0016021	glutathione transferase activity,glutathione peroxidase activity,prostaglandin-D synthase activity,glutathione binding,prostaglandin-E synthase activity,prostaglandin biosynthetic process,prostaglandin metabolic process,negative regulation of cell population proliferation,sensory perception of pain,regulation of fever generation,positive regulation of prostaglandin secretion,regulation of inflamm…	2.2325	3.6482	9.55144	0.0107637	0.18303	1
ENSCAFG00845025910		NA		protein_coding	GO:0003677,GO:0000786,GO:0046982	DNA binding,nucleosome,protein heterodimerization activity	1.72704	5.10636	9.48542	0.0109671	0.184634	1
ENSCAFG00845020101	CDC25C	610456	cell division cycle 25C [Source:HGNC Symbol;Acc:HGNC:1727]	protein_coding	GO:0004725,GO:0006470,GO:1902751,GO:0019901,GO:0050699,GO:0000086,GO:0005634,GO:0005737,GO:0005758,GO:0016607	protein tyrosine phosphatase activity,protein dephosphorylation,positive regulation of cell cycle G2/M phase transition,protein kinase binding,WW domain binding,G2/M transition of mitotic cell cycle,nucleus,cytoplasm,mitochondrial intermembrane space,nuclear speck	1.54874	1.07927	9.47615	0.010996	0.184634	1
ENSCAFG00845027353		NA		protein_coding			1.60046	1.21031	9.47267	0.0110069	0.184643	1
ENSCAFG00845000104	FBXO5	612020	F-box protein 5 [Source:HGNC Symbol;Acc:HGNC:13584]	protein_coding	GO:0005515,GO:0010997,GO:0019901,GO:1990948,GO:0001556,GO:0006275,GO:0007057,GO:0007346,GO:0008284,GO:0010971,GO:0016050,GO:0032876,GO:0040020,GO:0045669,GO:0045835,GO:0045841,GO:0046785,GO:0051225,GO:0051444,GO:0070169,GO:1904667,GO:1905322,GO:2000773,GO:2001021,GO:0005634,GO:0005654,GO:0005737,GO:0005819,GO:0072687	protein binding,anaphase-promoting complex binding,protein kinase binding,ubiquitin ligase inhibitor activity,oocyte maturation,regulation of DNA replication,spindle assembly involved in female meiosis I,regulation of mitotic cell cycle,positive regulation of cell population proliferation,positive regulation of G2/M transition of mitotic cell cycle,vesicle organization,negative regulation of DNA …	1.26857	2.16034	9.41308	0.0111952	0.185353	1
ENSCAFG00845031116		487476		protein_coding	GO:0007165	signal transduction	1.64473	2.80597	9.36506	0.0113499	0.186088	1
ENSCAFG00845013915		NA		lncRNA			2.82051	-0.600453	9.27833	0.0116357	0.187286	1
ENSCAFG00845029607		475154		protein_coding	GO:0005874,GO:0000226,GO:0005819,GO:0000281,GO:0040001	microtubule,microtubule cytoskeleton organization,spindle,mitotic cytokinesis,establishment of mitotic spindle localization	1.27453	3.10145	9.24616	0.0117439	0.187365	1
ENSCAFG00845027328	BUB1B	608350		protein_coding	GO:0007094,GO:0007091,GO:0071459,GO:0000776,GO:0000940	mitotic spindle assembly checkpoint signaling,metaphase/anaphase transition of mitotic cell cycle,protein localization to chromosome, centromeric region,kinetochore,outer kinetochore	1.62202	2.79095	9.23698	0.0117749	0.187365	1
ENSCAFG00845008476	GZMB,GZMB	490630,490629	granzyme B [Source:HGNC Symbol;Acc:HGNC:4709],granzyme B [Source:HGNC Symbol;Acc:HGNC:4709]	protein_coding,protein_coding	GO:0006508,GO:0004252,GO:0017148,GO:0042267,GO:0051603,GO:0070269,GO:0140507,GO:0044194	proteolysis,serine-type endopeptidase activity,negative regulation of translation,natural killer cell mediated cytotoxicity,proteolysis involved in cellular protein catabolic process,pyroptosis,granzyme-mediated programmed cell death signaling pathway,cytolytic granule	4.21159	4.09015	9.21082	0.0118641	0.187811	1
ENSCAFG00845010664		NA		lncRNA			2.2014	0.634035	9.16532	0.0120211	0.188902	1
ENSCAFG00845012486	PSMB10	489749	proteasome 20S subunit beta 10 [Source:HGNC Symbol;Acc:HGNC:9538]	protein_coding	GO:0004298,GO:0051603,GO:0005839,GO:0004175,GO:0002376,GO:0005839,GO:1990111,GO:0000902,GO:0042098	threonine-type endopeptidase activity,proteolysis involved in cellular protein catabolic process,proteasome core complex,endopeptidase activity,immune system process,proteasome core complex,spermatoproteasome complex,cell morphogenesis,T cell proliferation	1.06655	3.57347	9.14951	0.0120763	0.188902	1
ENSCAFG00845007515	CEACAM20	476441	CEA cell adhesion molecule 20 [Source:HGNC Symbol;Acc:HGNC:24879]	protein_coding			1.99159	-1.448	9.12426	0.012165	0.188902	1
ENSCAFG00845004630	ABCC11	100856571	ATP binding cassette subfamily C member 11 [Source:HGNC Symbol;Acc:HGNC:14639]	protein_coding	GO:0016021,GO:0005524,GO:0055085,GO:0042626,GO:0016324,GO:0005887,GO:0008559,GO:0015432,GO:0015721,GO:0140359,GO:0042908,GO:0008514,GO:0015216,GO:0015431,GO:0015711,GO:0015865,GO:0071716	integral component of membrane,ATP binding,transmembrane transport,ATPase-coupled transmembrane transporter activity,apical plasma membrane,integral component of plasma membrane,ABC-type xenobiotic transporter activity,ABC-type bile acid transporter activity,bile acid and bile salt transport,ABC-type transporter activity,xenobiotic transport,organic anion transmembrane transporter activity,purine…	1.87945	0.759982	9.12267	0.0121706	0.188902	1
ENSCAFG00845028677		100856270		protein_coding			2.21985	3.25215	9.11299	0.0122048	0.188902	1
ENSCAFG00845013520	KYNU	483907	kynureninase [Source:HGNC Symbol;Acc:HGNC:6469]	protein_coding	GO:0005737,GO:0003824,GO:0030170,GO:0009435,GO:0030429,GO:0006569,GO:0042803,GO:0061981,GO:0019805,GO:0034341,GO:0034516,GO:0043420,GO:0005654,GO:0005739,GO:0005829	cytoplasm,catalytic activity,pyridoxal phosphate binding,NAD biosynthetic process,kynureninase activity,tryptophan catabolic process,protein homodimerization activity,3-hydroxykynureninase activity,quinolinate biosynthetic process,response to interferon-gamma,response to vitamin B6,anthranilate metabolic process,nucleoplasm,mitochondrion,cytosol	2.6671	5.85487	9.10882	0.0122196	0.188902	1
ENSCAFG00845015124	E2F2	100855664	E2F transcription factor 2 [Source:HGNC Symbol;Acc:HGNC:3114]	protein_coding	GO:0006355,GO:0006357,GO:0005667,GO:0046983,GO:0000978,GO:0000977,GO:0000987,GO:0001228,GO:0003700,GO:0043565,GO:1990837,GO:0045944,GO:0051726,GO:0072332,GO:1903671,GO:1990086,GO:0005634,GO:0090575	regulation of transcription, DNA-templated,regulation of transcription by RNA polymerase II,transcription regulator complex,protein dimerization activity,RNA polymerase II cis-regulatory region sequence-specific DNA binding,RNA polymerase II transcription regulatory region sequence-specific DNA binding,cis-regulatory region sequence-specific DNA binding,DNA-binding transcription activator activit…	1.45015	1.46693	9.08485	0.012305	0.188902	1
ENSCAFG00845013268	MYBL2	477232	MYB proto-oncogene like 2 [Source:HGNC Symbol;Acc:HGNC:7548]	protein_coding	GO:0000981,GO:0005654,GO:1990837,GO:0005634,GO:0000978,GO:0001228,GO:0045944,GO:1990830,GO:0090307,GO:0031523	DNA-binding transcription factor activity, RNA polymerase II-specific,nucleoplasm,sequence-specific double-stranded DNA binding,nucleus,RNA polymerase II cis-regulatory region sequence-specific DNA binding,DNA-binding transcription activator activity, RNA polymerase II-specific,positive regulation of transcription by RNA polymerase II,cellular response to leukemia inhibitory factor,mitotic spindl…	1.75707	2.7041	9.0711	0.0123543	0.188902	1
ENSCAFG00845021929	OR52D3	100685491	olfactory receptor family 52 subfamily D member 3 [Source:NCBI gene (formerly Entrezgene);Acc:100685491]	protein_coding	GO:0007186,GO:0016021,GO:0004930,GO:0004984	G protein-coupled receptor signaling pathway,integral component of membrane,G protein-coupled receptor activity,olfactory receptor activity	2.74115	-1.58144	9.05767	0.0124027	0.188902	1
ENSCAFG00845009146	PARPBP	612196	PARP1 binding protein [Source:HGNC Symbol;Acc:HGNC:26074]	protein_coding	GO:2000042,GO:0000785,GO:0005654,GO:2000042	negative regulation of double-strand break repair via homologous recombination,chromatin,nucleoplasm,negative regulation of double-strand break repair via homologous recombination	1.53643	2.1967	9.05351	0.0124177	0.188902	1
ENSCAFG00845008263	TOP2A	480525	DNA topoisomerase II alpha [Source:HGNC Symbol;Acc:HGNC:11989]	protein_coding	GO:0003677,GO:0005524,GO:0006265,GO:0003918,GO:0006259,GO:0005737,GO:0005634,GO:0003677,GO:0006974,GO:0000287,GO:0005814,GO:0042826,GO:0005730,GO:0005654,GO:0043130,GO:0007059,GO:1990904,GO:0042803,GO:0003918,GO:0006265,GO:0043065,GO:0032991,GO:0019899,GO:0003682,GO:0046982,GO:0000228,GO:0008022,GO:0045944,GO:0002244,GO:0005080,GO:0030263,GO:0000775,GO:0042752,GO:0007143,GO:0000793,GO:0040016,GO:…	DNA binding,ATP binding,DNA topological change,DNA topoisomerase type II (double strand cut, ATP-hydrolyzing) activity,DNA metabolic process,cytoplasm,nucleus,DNA binding,cellular response to DNA damage stimulus,magnesium ion binding,centriole,histone deacetylase binding,nucleolus,nucleoplasm,ubiquitin binding,chromosome segregation,ribonucleoprotein complex,protein homodimerization activity,DNA …	1.85959	4.75796	9.04191	0.0124597	0.188902	1
ENSCAFG00845025399		NA		protein_coding	GO:0055085,GO:0005739,GO:0008308,GO:0098656,GO:0005741,GO:1902017	transmembrane transport,mitochondrion,voltage-gated anion channel activity,anion transmembrane transport,mitochondrial outer membrane,regulation of cilium assembly	2.52123	-2.88356	9.02889	0.0125071	0.188902	1
ENSCAFG00845024677	PRR11	610044	proline rich 11 [Source:HGNC Symbol;Acc:HGNC:25619]	protein_coding	GO:0005737,GO:0005634,GO:0051726	cytoplasm,nucleus,regulation of cell cycle	1.41459	0.881449	9.01092	0.0125729	0.188902	1
ENSCAFG00845015070	DLGAP5	480331	DLG associated protein 5 [Source:HGNC Symbol;Acc:HGNC:16864]	protein_coding	GO:0023052,GO:0005634,GO:0005829,GO:0005739,GO:0034451,GO:0031616	signaling,nucleus,cytosol,mitochondrion,centriolar satellite,spindle pole centrosome	1.55053	2.34922	8.9874	0.0126596	0.188902	1
ENSCAFG00845002501	HAVCR1	612069	hepatitis A virus cellular receptor 1 [Source:NCBI gene (formerly Entrezgene);Acc:612069]	protein_coding			2.1913	5.44957	8.92995	0.0128744	0.189289	1
ENSCAFG00845018899		NA		lncRNA			1.58136	-1.08935	8.86761	0.0131124	0.190038	1
ENSCAFG00845015738	H2BC13,H2BC13,H2BC13,H2BC13,H2BC13,H2BC13,H2BC13,H2BC13,H2BC13,H2BC13	119867696,119867694,119867693,106558265,100856186,611482,611465,608682,488267,478743	,,,,,,,,,	protein_coding,protein_coding,protein_coding,protein_coding,protein_coding,protein_coding,protein_coding,protein_coding,protein_coding,protein_coding	GO:0003677,GO:0000786,GO:0046982	DNA binding,nucleosome,protein heterodimerization activity	1.64701	0.0802035	8.85181	0.0131736	0.190038	1
ENSCAFG00845010616		482849		protein_coding	GO:0006508,GO:0008237,GO:0004222	proteolysis,metallopeptidase activity,metalloendopeptidase activity	1.42315	1.89192	8.84003	0.0132194	0.190151	1
ENSCAFG00845023145		119864445		protein_coding	GO:0007165	signal transduction	1.24763	4.50902	8.77465	0.0134773	0.190881	1
ENSCAFG00845014719	BIRC5	119863893		protein_coding	GO:0016787,GO:0019441,GO:0004061	hydrolase activity,tryptophan catabolic process to kynurenine,arylformamidase activity	1.50942	3.08497	8.74742	0.0135865	0.190881	1
ENSCAFG00845017745		NA		protein_coding			1.28902	1.38222	8.66443	0.0139259	0.192969	1
ENSCAFG00845025954		NA		protein_coding	GO:0003677,GO:0000786,GO:0006334	DNA binding,nucleosome,nucleosome assembly	1.28882	4.32834	8.64509	0.0140065	0.19374	1
ENSCAFG00845019276	CEP55	477773	centrosomal protein 55 [Source:HGNC Symbol;Acc:HGNC:1161]	protein_coding	GO:0000281,GO:0014066,GO:0005813,GO:0045184,GO:0005886,GO:0042802,GO:0061952,GO:0000281,GO:0030496,GO:0034451,GO:0090543,GO:1904888,GO:0045171	mitotic cytokinesis,regulation of phosphatidylinositol 3-kinase signaling,centrosome,establishment of protein localization,plasma membrane,identical protein binding,midbody abscission,mitotic cytokinesis,midbody,centriolar satellite,Flemming body,cranial skeletal system development,intercellular bridge	1.95173	1.58483	8.63835	0.0140347	0.19374	1
ENSCAFG00845007033		102152928		protein_coding	GO:0005125,GO:0006955	cytokine activity,immune response	2.86099	2.58504	8.62761	0.0140798	0.193774	1
ENSCAFG00845010380	,	119865338,403631	,	protein_coding,protein_coding	GO:0008199,GO:0006826,GO:0006879	ferric iron binding,iron ion transport,cellular iron ion homeostasis	1.14504	9.4166	8.58903	0.0142431	0.194698	1
ENSCAFG00845029114	CIT	100683247	citron rho-interacting serine/threonine kinase [Source:HGNC Symbol;Acc:HGNC:1985]	protein_coding	GO:0005524,GO:0006468,GO:0035556,GO:0004674,GO:0004672,GO:0000281,GO:0030165,GO:0000281,GO:0032467,GO:0005829,GO:0097110,GO:0035331,GO:0051402,GO:0001223,GO:0019901,GO:0030291	ATP binding,protein phosphorylation,intracellular signal transduction,protein serine/threonine kinase activity,protein kinase activity,mitotic cytokinesis,PDZ domain binding,mitotic cytokinesis,positive regulation of cytokinesis,cytosol,scaffold protein binding,negative regulation of hippo signaling,neuron apoptotic process,transcription coactivator binding,protein kinase binding,protein serine/t…	1.20071	3.83751	8.57882	0.0142868	0.19492	1
ENSCAFG00845020502	ESPL1	607879	extra spindle pole bodies like 1, separase [Source:HGNC Symbol;Acc:HGNC:16856]	protein_coding	GO:0005634,GO:0006508,GO:0004197,GO:0005813,GO:0008233,GO:0000278,GO:0007059,GO:0000212,GO:0008234,GO:0000070,GO:0007127,GO:0045143	nucleus,proteolysis,cysteine-type endopeptidase activity,centrosome,peptidase activity,mitotic cell cycle,chromosome segregation,meiotic spindle organization,cysteine-type peptidase activity,mitotic sister chromatid segregation,meiosis I,homologous chromosome segregation	1.45208	2.01788	8.52371	0.014525	0.196165	1
ENSCAFG00845005099		NA		lncRNA			2.61538	-2.3497	8.51659	0.0145561	0.196323	1
ENSCAFG00845017546	LRRC8C	490168	leucine rich repeat containing 8 VRAC subunit C [Source:HGNC Symbol;Acc:HGNC:25075]	protein_coding	GO:0005515,GO:0005737,GO:0005886,GO:0005887,GO:0005783,GO:0045444,GO:0034214,GO:0034702,GO:0005225,GO:0098656,GO:0140361	protein binding,cytoplasm,plasma membrane,integral component of plasma membrane,endoplasmic reticulum,fat cell differentiation,protein hexamerization,ion channel complex,volume-sensitive anion channel activity,anion transmembrane transport,cyclic-GMP-AMP transmembrane import across plasma membrane	0.848408	6.37034	8.51429	0.0145662	0.196328	1
ENSCAFG00845015750	UBE2C	485898		protein_coding			2.01539	1.81758	8.50899	0.0145894	0.196376	1
ENSCAFG00845018957	TPX2	477186	TPX2 microtubule nucleation factor [Source:HGNC Symbol;Acc:HGNC:1249]	protein_coding	GO:0005874,GO:0032147,GO:0060236,GO:0005819,GO:0005819,GO:0019901,GO:0005654,GO:0043203,GO:0045171,GO:0090307,GO:0090307,GO:0072686,GO:0015630,GO:0060236,GO:0007026,GO:0000922,GO:0061676,GO:0007020,GO:0032147	microtubule,activation of protein kinase activity,regulation of mitotic spindle organization,spindle,spindle,protein kinase binding,nucleoplasm,axon hillock,intercellular bridge,mitotic spindle assembly,mitotic spindle assembly,mitotic spindle,microtubule cytoskeleton,regulation of mitotic spindle organization,negative regulation of microtubule depolymerization,spindle pole,importin-alpha family …	1.65389	4.18815	8.47975	0.0147185	0.196376	1
ENSCAFG00845014892	DOCK10	100684934	dedicator of cytokinesis 10 [Source:HGNC Symbol;Acc:HGNC:23479]	protein_coding	GO:0005085,GO:0007264,GO:0030334,GO:0005634,GO:0005654,GO:0005737,GO:0005829	guanyl-nucleotide exchange factor activity,small GTPase mediated signal transduction,regulation of cell migration,nucleus,nucleoplasm,cytoplasm,cytosol	0.979604	8.05629	8.4792	0.0147209	0.196376	1
ENSCAFG00845028680	KNL1	478260	kinetochore scaffold 1 [Source:HGNC Symbol;Acc:HGNC:24054]	protein_coding	GO:0051301,GO:0034501,GO:0008608,GO:0005634,GO:0001669,GO:0005654,GO:0016604,GO:0034501,GO:0008608,GO:0000776	cell division,protein localization to kinetochore,attachment of spindle microtubules to kinetochore,nucleus,acrosomal vesicle,nucleoplasm,nuclear body,protein localization to kinetochore,attachment of spindle microtubules to kinetochore,kinetochore	1.48743	4.14247	8.47659	0.0147325	0.196376	1
ENSCAFG00845018672	CTSB	486077	cathepsin B [Source:HGNC Symbol;Acc:HGNC:2527]	protein_coding	GO:0006508,GO:0008234,GO:0004197,GO:0050790,GO:0048471,GO:0005615,GO:0005764,GO:0006590,GO:0030855,GO:0009897,GO:0004175,GO:0097067,GO:0008233,GO:0006508,GO:0051603,GO:0051603,GO:0046718,GO:0005518,GO:0043394,GO:0004197,GO:0046697,GO:0008234,GO:0030574	proteolysis,cysteine-type peptidase activity,cysteine-type endopeptidase activity,regulation of catalytic activity,perinuclear region of cytoplasm,extracellular space,lysosome,thyroid hormone generation,epithelial cell differentiation,external side of plasma membrane,endopeptidase activity,cellular response to thyroid hormone stimulus,peptidase activity,proteolysis,proteolysis involved in cellula…	1.35612	8.21113	8.46183	0.0147982	0.196703	1
ENSCAFG00845010104	C3	476728	complement C3 [Source:HGNC Symbol;Acc:HGNC:1318]	protein_coding	GO:0005576,GO:0005515,GO:0005615,GO:0004866,GO:0006956,GO:0005615,GO:0032991,GO:0001934,GO:0009986,GO:0005576,GO:0010575,GO:0045766,GO:0009617,GO:0050766,GO:0010828,GO:0045745,GO:0001798,GO:0006956,GO:0035846,GO:0097278,GO:0031715,GO:0001970,GO:0006956,GO:0010866,GO:0010884,GO:0016322,GO:0048260,GO:0060100,GO:0097242,GO:0150062,GO:0150064,GO:1905114,GO:2000427	extracellular region,protein binding,extracellular space,endopeptidase inhibitor activity,complement activation,extracellular space,protein-containing complex,positive regulation of protein phosphorylation,cell surface,extracellular region,positive regulation of vascular endothelial growth factor production,positive regulation of angiogenesis,response to bacterium,positive regulation of phagocyto…	1.23998	8.1262	8.43834	0.0149035	0.197329	1
ENSCAFG00845000445	NCAPG	479132	non-SMC condensin I complex subunit G [Source:HGNC Symbol;Acc:HGNC:24304]	protein_coding	GO:0007076,GO:0000796	mitotic chromosome condensation,condensin complex	1.85393	2.78498	8.39242	0.0151121	0.198785	1
ENSCAFG00845017509	SHCBP1	475347		protein_coding			1.91416	1.75922	8.3789	0.0151741	0.198907	1
ENSCAFG00845019953	RDH8	611300	retinol dehydrogenase 8 [Source:HGNC Symbol;Acc:HGNC:14423]	protein_coding	GO:0005737,GO:0016491,GO:0004303,GO:0006703,GO:0004745,GO:0007601,GO:0042572	cytoplasm,oxidoreductase activity,estradiol 17-beta-dehydrogenase activity,estrogen biosynthetic process,NAD-retinol dehydrogenase activity,visual perception,retinol metabolic process	1.80206	-2.21853	8.35908	0.0152657	0.198907	1
ENSCAFG00845004060	CCNF	610890	cyclin F [Source:HGNC Symbol;Acc:HGNC:1591]	protein_coding	GO:0005515,GO:0005634,GO:0005814,GO:0016567,GO:0051726,GO:0019005,GO:0031146,GO:0030054,GO:0005813,GO:0001890,GO:0000320,GO:0010826,GO:0010997,GO:0010826	protein binding,nucleus,centriole,protein ubiquitination,regulation of cell cycle,SCF ubiquitin ligase complex,SCF-dependent proteasomal ubiquitin-dependent protein catabolic process,cell junction,centrosome,placenta development,re-entry into mitotic cell cycle,negative regulation of centrosome duplication,anaphase-promoting complex binding,negative regulation of centrosome duplication	1.47504	1.99725	8.35217	0.0152978	0.198907	1
ENSCAFG00845007512	DEPDC1B	608968	DEP domain containing 1B [Source:HGNC Symbol;Acc:HGNC:24902]	protein_coding	GO:0007165,GO:0035556,GO:0016477,GO:0030177	signal transduction,intracellular signal transduction,cell migration,positive regulation of Wnt signaling pathway	1.5252	2.69073	8.34566	0.0153281	0.198907	1
ENSCAFG00845016900	CXorf65	100855665	chromosome X open reading frame 65 [Source:HGNC Symbol;Acc:HGNC:33713]	protein_coding			2.39871	-0.410893	8.2971	0.0155562	0.199899	1
ENSCAFG00845017021	KIF11	477769	kinesin family member 11 [Source:HGNC Symbol;Acc:HGNC:6388]	protein_coding	GO:0005524,GO:0008017,GO:0003777,GO:0007018,GO:1990939,GO:0019901,GO:0007051,GO:0007100,GO:0046602,GO:0051225,GO:0090307,GO:0000922,GO:0005819,GO:0005829,GO:0005874,GO:0005876,GO:0032991,GO:0072686	ATP binding,microtubule binding,microtubule motor activity,microtubule-based movement,ATP-dependent microtubule motor activity,protein kinase binding,spindle organization,mitotic centrosome separation,regulation of mitotic centrosome separation,spindle assembly,mitotic spindle assembly,spindle pole,spindle,cytosol,microtubule,spindle microtubule,protein-containing complex,mitotic spindle	1.95724	4.10932	8.27719	0.015651	0.200008	1
ENSCAFG00845022384	UBP1	485572	upstream binding protein 1 [Source:HGNC Symbol;Acc:HGNC:12507]	protein_coding	GO:0003700,GO:0006357,GO:0005634,GO:0000978,GO:0006357,GO:0045944,GO:0001228,GO:0005829,GO:0005654,GO:1990837,GO:0001525,GO:0032897	DNA-binding transcription factor activity,regulation of transcription by RNA polymerase II,nucleus,RNA polymerase II cis-regulatory region sequence-specific DNA binding,regulation of transcription by RNA polymerase II,positive regulation of transcription by RNA polymerase II,DNA-binding transcription activator activity, RNA polymerase II-specific,cytosol,nucleoplasm,sequence-specific double-stran…	0.601051	7.08083	8.26108	0.0157282	0.200629	1
ENSCAFG00845011573		NA		lncRNA			1.67293	-2.91437	8.23384	0.0158597	0.201671	1
ENSCAFG00845007948	RSKR,RSKR	610931,480623	,	protein_coding,protein_coding	GO:0051301,GO:0051988,GO:0036064,GO:0035253,GO:0051294,GO:0072686,GO:0005524,GO:0006468,GO:0004672	cell division,regulation of attachment of spindle microtubules to kinetochore,ciliary basal body,ciliary rootlet,establishment of spindle orientation,mitotic spindle,ATP binding,protein phosphorylation,protein kinase activity	0.862037	4.00906	8.1622	0.016212	0.204098	1
ENSCAFG00845009996	ESCO2	486098	establishment of sister chromatid cohesion N-acetyltransferase 2 [Source:HGNC Symbol;Acc:HGNC:27230]	protein_coding	GO:0005694,GO:0006275,GO:0000785,GO:0005654,GO:0005794,GO:0030054,GO:0002244,GO:0016407,GO:0001741,GO:0005721,GO:0034421,GO:0007059,GO:0006302,GO:0071168,GO:0004468,GO:0010369,GO:0035861	chromosome,regulation of DNA replication,chromatin,nucleoplasm,Golgi apparatus,cell junction,hematopoietic progenitor cell differentiation,acetyltransferase activity,XY body,pericentric heterochromatin,post-translational protein acetylation,chromosome segregation,double-strand break repair,protein localization to chromatin,lysine N-acetyltransferase activity, acting on acetyl phosphate as donor,c…	1.72733	2.14339	8.15302	0.0162578	0.204365	1
ENSCAFG00845013648	AGAP2	481130	ArfGAP with GTPase domain, ankyrin repeat and PH domain 2 [Source:HGNC Symbol;Acc:HGNC:16921]	protein_coding	GO:0005515,GO:0005525,GO:0005096,GO:0003924,GO:0060749,GO:0005829,GO:0005654,GO:0043066,GO:0045944,GO:0033601,GO:0046427,GO:0090543	protein binding,GTP binding,GTPase activator activity,GTPase activity,mammary gland alveolus development,cytosol,nucleoplasm,negative regulation of apoptotic process,positive regulation of transcription by RNA polymerase II,positive regulation of mammary gland epithelial cell proliferation,positive regulation of receptor signaling pathway via JAK-STAT,Flemming body	1.05402	2.63928	8.12518	0.0163978	0.20516	1
ENSCAFG00845010215	SNORA73	119870553	Small nucleolar RNA SNORA73 family [Source:RFAM;Acc:RF00045]	snoRNA	GO:0006396,GO:0005730	RNA processing,nucleolus	0.97836	4.78389	8.11336	0.0164576	0.205538	1
ENSCAFG00845007297	KRT26	491008	keratin 26 [Source:NCBI gene (formerly Entrezgene);Acc:491008]	protein_coding	GO:0005198	structural molecule activity	2.80202	-2.68473	8.10742	0.0164878	0.20565	1
ENSCAFG00845010474	IRF1	100855872	interferon regulatory factor 1 [Source:HGNC Symbol;Acc:HGNC:6116]	protein_coding	GO:0006355,GO:0003700,GO:0000976,GO:0006915,GO:0050776,GO:0008285,GO:0005737,GO:0005634,GO:0006915,GO:0051607,GO:0051607,GO:0045893,GO:0051726,GO:0045892,GO:0045892,GO:0000981,GO:0000976,GO:0071260,GO:0000785,GO:0010468,GO:0043565,GO:0003677,GO:0045944,GO:0001228,GO:0003700,GO:0045944,GO:0032481,GO:0032728,GO:0043374,GO:0032735,GO:0000978,GO:0034124,GO:0035458,GO:0045590,GO:0060333,GO:2000564	regulation of transcription, DNA-templated,DNA-binding transcription factor activity,transcription cis-regulatory region binding,apoptotic process,regulation of immune response,negative regulation of cell population proliferation,cytoplasm,nucleus,apoptotic process,defense response to virus,defense response to virus,positive regulation of transcription, DNA-templated,regulation of cell cycle,nega…	0.933249	5.82217	8.01494	0.0169663	0.207593	1
ENSCAFG00845011938	CENPH	610124	centromere protein H [Source:HGNC Symbol;Acc:HGNC:17268]	protein_coding	GO:0000776,GO:0051382,GO:0005634,GO:0005654,GO:0005694,GO:0005730,GO:0043515,GO:0000776	kinetochore,kinetochore assembly,nucleus,nucleoplasm,chromosome,nucleolus,kinetochore binding,kinetochore	0.941007	1.88924	8.0118	0.0169828	0.2076	1
ENSCAFG00845002429	BLM	100685609	BLM RecQ like helicase [Source:HGNC Symbol;Acc:HGNC:1058]	protein_coding	GO:0003677,GO:0005634,GO:0005524,GO:0016818,GO:0006281,GO:0003676,GO:0044237,GO:0006260,GO:0000166,GO:0006310,GO:0004386,GO:0043138,GO:0000400,GO:0000403,GO:0000405,GO:0002039,GO:0003678,GO:0003697,GO:0008094,GO:0008270,GO:0009378,GO:0042802,GO:0042803,GO:0051880,GO:0061749,GO:0061821,GO:1905773,GO:1990814,GO:0000079,GO:0000729,GO:0006974,GO:0007095,GO:0010165,GO:0031297,GO:0032508,GO:0044806,GO:…	DNA binding,nucleus,ATP binding,hydrolase activity, acting on acid anhydrides, in phosphorus-containing anhydrides,DNA repair,nucleic acid binding,cellular metabolic process,DNA replication,nucleotide binding,DNA recombination,helicase activity,3'-5' DNA helicase activity,four-way junction DNA binding,Y-form DNA binding,bubble DNA binding,p53 binding,DNA helicase activity,single-stranded DNA bind…	0.975167	4.79362	7.99708	0.0170606	0.207785	1
ENSCAFG00845010016	GTSE1	608855	G2 and S-phase expressed 1 [Source:HGNC Symbol;Acc:HGNC:13698]	protein_coding	GO:0005881	cytoplasmic microtubule	1.11811	2.14854	7.983	0.0171354	0.208083	1
ENSCAFG00845027345	CDCA3	611617	cell division cycle associated 3 [Source:HGNC Symbol;Acc:HGNC:14624]	protein_coding	GO:0005912	adherens junction	1.56621	0.332815	7.93017	0.0174196	0.208267	1
ENSCAFG00845025952	RRM2	482963	ribonucleotide reductase regulatory subunit M2 [Source:HGNC Symbol;Acc:HGNC:10452]	protein_coding	GO:0016491,GO:0009263,GO:0005829	oxidoreductase activity,deoxyribonucleotide biosynthetic process,cytosol	1.95246	3.33328	7.92005	0.0174747	0.20829	1
ENSCAFG00845016474	STIL	610305	STIL centriolar assembly protein [Source:HGNC Symbol;Acc:HGNC:10879]	protein_coding	GO:0005813,GO:0005737,GO:0042802,GO:0005814,GO:0071539,GO:0046599,GO:0007052,GO:0051298	centrosome,cytoplasm,identical protein binding,centriole,protein localization to centrosome,regulation of centriole replication,mitotic spindle organization,centrosome duplication	0.974283	3.19797	7.84056	0.0179147	0.210366	1
ENSCAFG00845006297	TFEC	100856330	transcription factor EC [Source:HGNC Symbol;Acc:HGNC:11754]	protein_coding	GO:0006355,GO:0046983,GO:0001227,GO:1990837,GO:0000122,GO:0034605,GO:0045944,GO:0005654	regulation of transcription, DNA-templated,protein dimerization activity,DNA-binding transcription repressor activity, RNA polymerase II-specific,sequence-specific double-stranded DNA binding,negative regulation of transcription by RNA polymerase II,cellular response to heat,positive regulation of transcription by RNA polymerase II,nucleoplasm	2.76782	5.42439	7.71509	0.0186369	0.213501	1
ENSCAFG00845026258	H3C8,H3C8,H3C8,H3C8,H3C8	115945196,106558266,106557493,611519,488263	H3 clustered histone 8 [Source:NCBI gene (formerly Entrezgene);Acc:115945196],H3 clustered histone 8 [Source:NCBI gene (formerly Entrezgene);Acc:115945196],H3 clustered histone 8 [Source:NCBI gene (formerly Entrezgene);Acc:115945196],H3 clustered histone 8 [Source:NCBI gene (formerly Entrezgene);Acc:115945196],H3 clustered histone 8 [Source:NCBI gene (formerly Entrezgene);Acc:115945196]	protein_coding,protein_coding,protein_coding,protein_coding,protein_coding	GO:0003677,GO:0000786,GO:0046982	DNA binding,nucleosome,protein heterodimerization activity	2.11536	1.65069	7.70582	0.0186916	0.213644	1
ENSCAFG00845027938	ADD2	610670	adducin 2 [Source:HGNC Symbol;Acc:HGNC:244]	protein_coding	GO:0005856,GO:0031410,GO:0014069,GO:0016020,GO:0042803,GO:0065003,GO:0032092,GO:0030097,GO:0051015,GO:0046982,GO:0005200,GO:0030507,GO:0019901,GO:0003779,GO:0007416,GO:0050900,GO:0050901,GO:0051016,GO:0051017,GO:0008290,GO:0044853	cytoskeleton,cytoplasmic vesicle,postsynaptic density,membrane,protein homodimerization activity,protein-containing complex assembly,positive regulation of protein binding,hemopoiesis,actin filament binding,protein heterodimerization activity,structural constituent of cytoskeleton,spectrin binding,protein kinase binding,actin binding,synapse assembly,leukocyte migration,leukocyte tethering or rol…	1.70285	2.40302	7.69221	0.0187724	0.213929	1
ENSCAFG00845012147		NA		lncRNA			0.728691	3.29802	7.68245	0.0188305	0.214055	1
ENSCAFG00845023122	PCLAF	106557458		protein_coding	GO:0051726,GO:0006974	regulation of cell cycle,cellular response to DNA damage stimulus	2.119	2.26558	7.67175	0.0188945	0.214125	1
ENSCAFG00845026304	H2AC15,H2AC15,H2AC15,H2AC15,H2AC15	119867706,106558234,100856200,488308,488262	,,,,	protein_coding,protein_coding,protein_coding,protein_coding,protein_coding	GO:0003677,GO:0000786,GO:0046982	DNA binding,nucleosome,protein heterodimerization activity	1.78878	3.35125	7.67146	0.0188962	0.214125	1
ENSCAFG00845004381		NA		protein_coding	GO:0008199,GO:0006826,GO:0006879	ferric iron binding,iron ion transport,cellular iron ion homeostasis	1.2306	3.65639	7.66581	0.0189301	0.214125	1
ENSCAFG00845023826	ACOT7	479589	acyl-CoA thioesterase 7 [Source:HGNC Symbol;Acc:HGNC:24157]	protein_coding	GO:0016790,GO:0005829,GO:0005654,GO:0042803,GO:0015937,GO:0000062,GO:0036042,GO:0016290,GO:0036114,GO:0036116,GO:0051792,GO:1900535	thiolester hydrolase activity,cytosol,nucleoplasm,protein homodimerization activity,coenzyme A biosynthetic process,fatty-acyl-CoA binding,long-chain fatty acyl-CoA binding,palmitoyl-CoA hydrolase activity,medium-chain fatty-acyl-CoA catabolic process,long-chain fatty-acyl-CoA catabolic process,medium-chain fatty acid biosynthetic process,palmitic acid biosynthetic process	1.19567	2.79471	7.64241	0.0190712	0.215039	1
ENSCAFG00845028253	MCM4	477871	minichromosome maintenance complex component 4 [Source:HGNC Symbol;Acc:HGNC:6947]	protein_coding	GO:0003677,GO:0005524,GO:0003678,GO:0006260,GO:0032508,GO:0006270,GO:0042555,GO:0003678,GO:0005654,GO:0042555	DNA binding,ATP binding,DNA helicase activity,DNA replication,DNA duplex unwinding,DNA replication initiation,MCM complex,DNA helicase activity,nucleoplasm,MCM complex	0.821782	4.75547	7.59685	0.0193497	0.216079	1
ENSCAFG00845000341	TICRR	609269	TOPBP1 interacting checkpoint and replication regulator [Source:HGNC Symbol;Acc:HGNC:28704]	protein_coding	GO:0005634,GO:0006260,GO:0010212,GO:0033314,GO:0003682,GO:0030174,GO:0005654,GO:0005829,GO:0043231	nucleus,DNA replication,response to ionizing radiation,mitotic DNA replication checkpoint signaling,chromatin binding,regulation of DNA-dependent DNA replication initiation,nucleoplasm,cytosol,intracellular membrane-bounded organelle	1.25695	2.48055	7.58699	0.0194107	0.216079	1
ENSCAFG00845013047	CRTAM	610296	cytotoxic and regulatory T cell molecule [Source:HGNC Symbol;Acc:HGNC:24313]	protein_coding	GO:0005102,GO:0001768,GO:0001819,GO:0002355,GO:0002860,GO:0007157,GO:0008037,GO:0032729,GO:0045580,GO:0045954,GO:0046007,GO:0050863,GO:0051606,GO:0097021,GO:2001185,GO:0001772,GO:0005886	signaling receptor binding,establishment of T cell polarity,positive regulation of cytokine production,detection of tumor cell,positive regulation of natural killer cell mediated cytotoxicity directed against tumor cell target,heterophilic cell-cell adhesion via plasma membrane cell adhesion molecules,cell recognition,positive regulation of interferon-gamma production,regulation of T cell differe…	2.43548	1.41261	7.58053	0.0194507	0.216079	1
ENSCAFG00845012112	DDIAS	485160	DNA damage induced apoptosis suppressor [Source:HGNC Symbol;Acc:HGNC:26351]	protein_coding	GO:1902230,GO:0097752,GO:1902230	negative regulation of intrinsic apoptotic signaling pathway in response to DNA damage,regulation of DNA stability,negative regulation of intrinsic apoptotic signaling pathway in response to DNA damage	1.45772	-0.193027	7.54975	0.0196428	0.216534	1
ENSCAFG00845017245	DLA-12	541592	MHC class I DLA-12 [Source:NCBI gene (formerly Entrezgene);Acc:541592]	protein_coding	GO:0006955,GO:0019882	immune response,antigen processing and presentation	1.1846	7.83741	7.49749	0.0199743	0.217285	1
ENSCAFG00845012798	CYRIB	482041	CYFIP related Rac1 interactor B [Source:HGNC Symbol;Acc:HGNC:25216]	protein_coding	GO:0030833,GO:0031267,GO:0023030,GO:0001916,GO:0030334,GO:0030837,GO:0032729,GO:0050870,GO:0050920,GO:0051058,GO:0071219,GO:0090140,GO:2000114,GO:2000568,GO:0005739,GO:0005929	regulation of actin filament polymerization,small GTPase binding,MHC class Ib protein binding, via antigen binding groove,positive regulation of T cell mediated cytotoxicity,regulation of cell migration,negative regulation of actin filament polymerization,positive regulation of interferon-gamma production,positive regulation of T cell activation,regulation of chemotaxis,negative regulation of sma…	0.851479	7.70737	7.4781	0.020099	0.217285	1
ENSCAFG00845018851		NA		lncRNA			3.2809	0.296644	7.47522	0.0201176	0.217285	1
ENSCAFG00845027036		612071		protein_coding			1.89024	0.745193	7.45465	0.0202511	0.217925	1
ENSCAFG00845025134	C31H21orf91	487697	chromosome 21 open reading frame 91 [Source:HGNC Symbol;Acc:HGNC:16459]	protein_coding	GO:0021895,GO:0060999	cerebral cortex neuron differentiation,positive regulation of dendritic spine development	0.891257	6.33133	7.43442	0.0203834	0.21857	1
ENSCAFG00845026928	PLK4	476087	polo like kinase 4 [Source:HGNC Symbol;Acc:HGNC:11397]	protein_coding	GO:0005524,GO:0005515,GO:0006468,GO:0004674,GO:0004672,GO:0007099,GO:0005814,GO:0042802,GO:0046601,GO:0060271,GO:0060707,GO:0098535,GO:0001741,GO:0005730,GO:0005813,GO:0005829,GO:0098536	ATP binding,protein binding,protein phosphorylation,protein serine/threonine kinase activity,protein kinase activity,centriole replication,centriole,identical protein binding,positive regulation of centriole replication,cilium assembly,trophoblast giant cell differentiation,de novo centriole assembly involved in multi-ciliated epithelial cell differentiation,XY body,nucleolus,centrosome,cytosol,d…	1.26668	1.95654	7.35279	0.0209279	0.221788	1
ENSCAFG00845009905	CTSD	483662	cathepsin D [Source:NCBI gene (formerly Entrezgene);Acc:483662]	protein_coding	GO:0006508,GO:0004190,GO:0005764	proteolysis,aspartic-type endopeptidase activity,lysosome	1.19638	7.55362	7.32023	0.02115	0.223323	1
ENSCAFG00845030431	GCA	608208	grancalcin [Source:HGNC Symbol;Acc:HGNC:15990]	protein_coding	GO:0005509,GO:0042803,GO:0046982,GO:0005829,GO:0005886	calcium ion binding,protein homodimerization activity,protein heterodimerization activity,cytosol,plasma membrane	0.958823	4.17628	7.30654	0.0212442	0.2242	1
ENSCAFG00845009826	PBK	477371		protein_coding	GO:0005524,GO:0006468,GO:0004674,GO:0004672	ATP binding,protein phosphorylation,protein serine/threonine kinase activity,protein kinase activity	1.38967	1.5467	7.30157	0.0212786	0.224286	1
ENSCAFG00845025415	C1S	486714	complement C1s [Source:HGNC Symbol;Acc:HGNC:1247]	protein_coding	GO:0006508,GO:0005509,GO:0004252,GO:0006958,GO:0042802	proteolysis,calcium ion binding,serine-type endopeptidase activity,complement activation, classical pathway,identical protein binding	1.33626	6.55849	7.29791	0.0213039	0.224361	1
ENSCAFG00845027555	CACNG5	490905	calcium voltage-gated channel auxiliary subunit gamma 5 [Source:HGNC Symbol;Acc:HGNC:1409]	protein_coding	GO:0016021,GO:0016020,GO:0006816,GO:0098962,GO:0098978	integral component of membrane,membrane,calcium ion transport,regulation of postsynaptic neurotransmitter receptor activity,glutamatergic synapse	1.24362	0.057963	7.27651	0.0214527	0.225139	1
ENSCAFG00845002563	ERAP1	488898	endoplasmic reticulum aminopeptidase 1 [Source:HGNC Symbol;Acc:HGNC:18173]	protein_coding	GO:0008270,GO:0006508,GO:0008217,GO:0008237,GO:0070006,GO:0005789,GO:0019885,GO:0005576,GO:0004177,GO:0005138,GO:0008235,GO:0006509	zinc ion binding,proteolysis,regulation of blood pressure,metallopeptidase activity,metalloaminopeptidase activity,endoplasmic reticulum membrane,antigen processing and presentation of endogenous peptide antigen via MHC class I,extracellular region,aminopeptidase activity,interleukin-6 receptor binding,metalloexopeptidase activity,membrane protein ectodomain proteolysis	0.842995	6.68159	7.25588	0.0215973	0.225753	1
ENSCAFG00845029225	ANLN	482401	anillin actin binding protein [Source:HGNC Symbol;Acc:HGNC:14082]	protein_coding	GO:0003779,GO:0000281,GO:0090521,GO:1904172,GO:0005654,GO:0005826,GO:0015629,GO:0030496,GO:0032059	actin binding,mitotic cytokinesis,glomerular visceral epithelial cell migration,positive regulation of bleb assembly,nucleoplasm,actomyosin contractile ring,actin cytoskeleton,midbody,bleb	1.43363	4.82535	7.24712	0.0216591	0.225753	1
ENSCAFG00845028509	CST7	485563		protein_coding	GO:0004869,GO:0006955,GO:0030414,GO:0010466,GO:0031643,GO:0097340,GO:1903979,GO:0005615,GO:0005737,GO:0005764,GO:0005770,GO:0005783,GO:0005794,GO:0031410	cysteine-type endopeptidase inhibitor activity,immune response,peptidase inhibitor activity,negative regulation of peptidase activity,positive regulation of myelination,inhibition of cysteine-type endopeptidase activity,negative regulation of microglial cell activation,extracellular space,cytoplasm,lysosome,late endosome,endoplasmic reticulum,Golgi apparatus,cytoplasmic vesicle	0.839412	3.03927	7.23741	0.0217279	0.226038	1
ENSCAFG00845015458	BATF	611951	basic leucine zipper ATF-like transcription factor [Source:HGNC Symbol;Acc:HGNC:958]	protein_coding	GO:0003677,GO:0006355,GO:0003700,GO:0006357,GO:0030154,GO:0005737,GO:0005634,GO:0006974,GO:0003700,GO:0043565,GO:0005654,GO:1990837,GO:0000978,GO:0001228,GO:0045944,GO:0001819,GO:0043011,GO:0045190,GO:0030330,GO:0060218,GO:0002320,GO:0042832,GO:0045064,GO:0072539,GO:0072540	DNA binding,regulation of transcription, DNA-templated,DNA-binding transcription factor activity,regulation of transcription by RNA polymerase II,cell differentiation,cytoplasm,nucleus,cellular response to DNA damage stimulus,DNA-binding transcription factor activity,sequence-specific DNA binding,nucleoplasm,sequence-specific double-stranded DNA binding,RNA polymerase II cis-regulatory region seq…	1.58439	2.88945	7.22546	0.0218128	0.226038	1
ENSCAFG00845007176	KRT28	608107	keratin 28 [Source:NCBI gene (formerly Entrezgene);Acc:608107]	protein_coding	GO:0005198	structural molecule activity	1.81043	-2.43034	7.21298	0.021902	0.226538	1
ENSCAFG00845018868	E2F8	476885	E2F transcription factor 8 [Source:HGNC Symbol;Acc:HGNC:24727]	protein_coding	GO:0006355,GO:0006357,GO:0005667,GO:0000978,GO:0000987,GO:0001217,GO:0001227,GO:0003677,GO:0003700,GO:0042802,GO:1990837,GO:0000122,GO:0001890,GO:0002040,GO:0008283,GO:0032466,GO:0032877,GO:0033301,GO:0045944,GO:0060707,GO:0060718,GO:0070365,GO:0005634,GO:0005654,GO:0005730,GO:0005829	regulation of transcription, DNA-templated,regulation of transcription by RNA polymerase II,transcription regulator complex,RNA polymerase II cis-regulatory region sequence-specific DNA binding,cis-regulatory region sequence-specific DNA binding,DNA-binding transcription repressor activity,DNA-binding transcription repressor activity, RNA polymerase II-specific,DNA binding,DNA-binding transcripti…	1.3082	1.43051	7.18024	0.0221379	0.227925	1
ENSCAFG00845002475	NDC80	480190		protein_coding	GO:0031262,GO:0051315	Ndc80 complex,attachment of mitotic spindle microtubules to kinetochore	1.22267	3.05139	7.10029	0.0227271	0.230314	1
ENSCAFG00845026532		NA		lncRNA			3.65798	-0.556448	7.07585	0.0229109	0.230314	1
ENSCAFG00845017157	CENPI	119868476	centromere protein I [Source:HGNC Symbol;Acc:HGNC:3968]	protein_coding	GO:0000776,GO:0034508,GO:0005829,GO:0016604	kinetochore,centromere complex assembly,cytosol,nuclear body	1.10633	2.56613	7.01453	0.0233802	0.230981	1
ENSCAFG00845024783	BCL2L14	477693	BCL2 like 14 [Source:HGNC Symbol;Acc:HGNC:16657]	protein_coding	GO:0042981,GO:0019901,GO:0006915,GO:0005829,GO:0043229	regulation of apoptotic process,protein kinase binding,apoptotic process,cytosol,intracellular organelle	1.26501	2.92414	7.00626	0.0234444	0.231066	1
ENSCAFG00845026128	POLE	486223	DNA polymerase epsilon, catalytic subunit [Source:HGNC Symbol;Acc:HGNC:9177]	protein_coding	GO:0003677,GO:0008270,GO:0005634,GO:0006281,GO:0003676,GO:0006260,GO:0000166,GO:0003887,GO:0008622,GO:0005634,GO:0003677,GO:0006260,GO:0008622,GO:0003887,GO:0000082,GO:0003682,GO:0005886,GO:0005654,GO:0006297,GO:0000731,GO:0006287	DNA binding,zinc ion binding,nucleus,DNA repair,nucleic acid binding,DNA replication,nucleotide binding,DNA-directed DNA polymerase activity,epsilon DNA polymerase complex,nucleus,DNA binding,DNA replication,epsilon DNA polymerase complex,DNA-directed DNA polymerase activity,G1/S transition of mitotic cell cycle,chromatin binding,plasma membrane,nucleoplasm,nucleotide-excision repair, DNA gap fil…	0.868303	3.44061	6.9758	0.0236826	0.231796	1
ENSCAFG00845030202	NRAP	477823	nebulin related anchoring protein [Source:HGNC Symbol;Acc:HGNC:7988]	protein_coding	GO:0003779,GO:0003779,GO:0030016,GO:0017166,GO:0051371,GO:0005916,GO:0005927	actin binding,actin binding,myofibril,vinculin binding,muscle alpha-actinin binding,fascia adherens,muscle tendon junction	1.19032	0.777545	6.9616	0.0237946	0.232218	1
ENSCAFG00845010673		NA		lncRNA			3.21199	-2.05652	6.95559	0.0238422	0.232306	1
ENSCAFG00845028698	TRIM69	478285	tripartite motif containing 69 [Source:HGNC Symbol;Acc:HGNC:17857]	protein_coding	GO:0005515,GO:0005737,GO:0005634,GO:0016607,GO:0004842	protein binding,cytoplasm,nucleus,nuclear speck,ubiquitin-protein transferase activity	1.10297	4.59986	6.92349	0.0240986	0.233287	1
ENSCAFG00845024582	ASF1B	484905		protein_coding	GO:0005634,GO:0006333	nucleus,chromatin assembly or disassembly	1.71205	2.09245	6.91523	0.024165	0.233579	1
ENSCAFG00845020561	SLC15A1	403561	solute carrier family 15 member 1 [Source:NCBI gene (formerly Entrezgene);Acc:403561]	protein_coding	GO:0016021,GO:0016020,GO:0022857,GO:0055085,GO:0035673,GO:0006857,GO:0005427,GO:0015333,GO:0071916,GO:0140206,GO:0005886,GO:0005903	integral component of membrane,membrane,transmembrane transporter activity,transmembrane transport,oligopeptide transmembrane transporter activity,oligopeptide transport,proton-dependent oligopeptide secondary active transmembrane transporter activity,peptide:proton symporter activity,dipeptide transmembrane transporter activity,dipeptide import across plasma membrane,plasma membrane,brush border	2.7036	1.39282	6.85226	0.0246792	0.235557	1
ENSCAFG00845009719	DLA88	474836	MHC class I DLA-88 [Source:NCBI gene (formerly Entrezgene);Acc:474836]	protein_coding	GO:0006955,GO:0019882	immune response,antigen processing and presentation	1.24536	8.25932	6.84722	0.0247209	0.235557	1
ENSCAFG00845011924		NA		protein_coding	GO:0006355,GO:0005634,GO:0005668	regulation of transcription, DNA-templated,nucleus,RNA polymerase transcription factor SL1 complex	0.848107	2.67432	6.84468	0.024742	0.235557	1
ENSCAFG00845002514	SMCHD1	490535	structural maintenance of chromosomes flexible hinge domain containing 1 [Source:HGNC Symbol;Acc:HGNC:29090]	protein_coding	GO:0005524,GO:0005515,GO:0005694,GO:0006302,GO:0051276,GO:0016887,GO:0045739,GO:0042803,GO:0043584,GO:2001034,GO:0035861,GO:0000781,GO:2000042,GO:0009048,GO:0060821,GO:0009048,GO:0060820,GO:0001740	ATP binding,protein binding,chromosome,double-strand break repair,chromosome organization,ATPase,positive regulation of DNA repair,protein homodimerization activity,nose development,positive regulation of double-strand break repair via nonhomologous end joining,site of double-strand break,chromosome, telomeric region,negative regulation of double-strand break repair via homologous recombination,d…	0.960102	7.82532	6.84088	0.0247736	0.235634	1
ENSCAFG00845004521	EXO1	100855525	exonuclease 1 [Source:HGNC Symbol;Acc:HGNC:3511]	protein_coding	GO:0003677,GO:0003824,GO:0006281,GO:0016788,GO:0004518,GO:0035312,GO:0005634,GO:0003677,GO:0006310,GO:0006298,GO:0005886,GO:0005654,GO:0016604,GO:0003682,GO:0002455,GO:0016446,GO:0045190,GO:0035312,GO:0045145,GO:0048256,GO:0051908	DNA binding,catalytic activity,DNA repair,hydrolase activity, acting on ester bonds,nuclease activity,5'-3' exodeoxyribonuclease activity,nucleus,DNA binding,DNA recombination,mismatch repair,plasma membrane,nucleoplasm,nuclear body,chromatin binding,humoral immune response mediated by circulating immunoglobulin,somatic hypermutation of immunoglobulin genes,isotype switching,5'-3' exodeoxyribonuc…	1.40848	0.747513	6.78602	0.0252344	0.236589	1
ENSCAFG00845023751	MIS18A	609701	MIS18 kinetochore protein A [Source:HGNC Symbol;Acc:HGNC:1286]	protein_coding	GO:0005829,GO:0005654,GO:0042802,GO:0000775,GO:0007059,GO:0044030,GO:0034080	cytosol,nucleoplasm,identical protein binding,chromosome, centromeric region,chromosome segregation,regulation of DNA methylation,CENP-A containing nucleosome assembly	1.34247	0.658045	6.78014	0.0252845	0.236589	1
ENSCAFG00845025475	HJURP	100684935	Holliday junction recognition protein [Source:HGNC Symbol;Acc:HGNC:25444]	protein_coding	GO:0042393,GO:0042802,GO:0007059,GO:0034080,GO:0043254,GO:0051101,GO:0000775,GO:0000776,GO:0005654,GO:0005730,GO:0005739	histone binding,identical protein binding,chromosome segregation,CENP-A containing nucleosome assembly,regulation of protein-containing complex assembly,regulation of DNA binding,chromosome, centromeric region,kinetochore,nucleoplasm,nucleolus,mitochondrion	1.95649	2.1598	6.76776	0.0253901	0.236649	1
ENSCAFG00845026381	KLRD1	611360	killer cell lectin like receptor D1 [Source:NCBI gene (formerly Entrezgene);Acc:611360]	protein_coding	GO:0005887,GO:0043235,GO:0045954,GO:0045953,GO:0023024,GO:0023030,GO:0062082,GO:1990405,GO:0001915,GO:0002223,GO:0002228	integral component of plasma membrane,receptor complex,positive regulation of natural killer cell mediated cytotoxicity,negative regulation of natural killer cell mediated cytotoxicity,MHC class I protein complex binding,MHC class Ib protein binding, via antigen binding groove,HLA-E specific inhibitory MHC class Ib receptor activity,protein antigen binding,negative regulation of T cell mediated c…	3.61071	3.7661	6.76224	0.0254374	0.236649	1
ENSCAFG00845030625	RAD51AP1	611768	RAD51 associated protein 1 [Source:HGNC Symbol;Acc:HGNC:16956]	protein_coding	GO:0005634,GO:0003723,GO:0006281,GO:0003697,GO:0003690,GO:0003723,GO:0003677,GO:0006974,GO:0003697,GO:0032991,GO:1905168,GO:0003690,GO:0010569,GO:0071479,GO:0005634,GO:0000785,GO:0000724,GO:0036297,GO:0000217,GO:0062037,GO:0010845	nucleus,RNA binding,DNA repair,single-stranded DNA binding,double-stranded DNA binding,RNA binding,DNA binding,cellular response to DNA damage stimulus,single-stranded DNA binding,protein-containing complex,positive regulation of double-strand break repair via homologous recombination,double-stranded DNA binding,regulation of double-strand break repair via homologous recombination,cellular respon…	1.33601	2.03962	6.7416	0.0256152	0.237064	1
ENSCAFG00845022325	PLCL2	485652	phospholipase C like 2 [Source:HGNC Symbol;Acc:HGNC:9064]	protein_coding	GO:0007165,GO:0070679,GO:0035556,GO:0006629,GO:0004435,GO:0008081,GO:0050811,GO:0032228,GO:0002322,GO:0002337,GO:0007214,GO:0033135,GO:0050859,GO:0120163,GO:1900122	signal transduction,inositol 1,4,5 trisphosphate binding,intracellular signal transduction,lipid metabolic process,phosphatidylinositol phospholipase C activity,phosphoric diester hydrolase activity,GABA receptor binding,regulation of synaptic transmission, GABAergic,B cell proliferation involved in immune response,B-1a B cell differentiation,gamma-aminobutyric acid signaling pathway,regulation o…	0.95681	6.8672	6.71945	0.0258077	0.237866	1
ENSCAFG00845021707		NA		lncRNA			1.39696	-0.539719	6.71529	0.025844	0.238072	1
ENSCAFG00845021694	SPC24	611174	SPC24 component of NDC80 kinetochore complex [Source:HGNC Symbol;Acc:HGNC:26913]	protein_coding	GO:0005654,GO:0005730,GO:0031262	nucleoplasm,nucleolus,Ndc80 complex	1.45372	-0.190237	6.61376	0.0267506	0.241129	1
ENSCAFG00845026341	DSN1	610279	DSN1 component of MIS12 kinetochore complex [Source:HGNC Symbol;Acc:HGNC:16165]	protein_coding	GO:0007059,GO:0051301,GO:0000444,GO:0005829,GO:0005654,GO:0016604,GO:0005730,GO:0001650,GO:0000776,GO:0000444	chromosome segregation,cell division,MIS12/MIND type complex,cytosol,nucleoplasm,nuclear body,nucleolus,fibrillar center,kinetochore,MIS12/MIND type complex	0.977713	1.87619	6.61189	0.0267677	0.241129	1
ENSCAFG00845018602	P2RY11	100533479	purinergic receptor P2Y11 [Source:NCBI gene (formerly Entrezgene);Acc:100533479]	protein_coding	GO:0007186,GO:0016021,GO:0005886,GO:0004930,GO:0023041,GO:0030594,GO:0045031,GO:0019722,GO:0071318	G protein-coupled receptor signaling pathway,integral component of membrane,plasma membrane,G protein-coupled receptor activity,neuronal signal transduction,neurotransmitter receptor activity,G protein-coupled ATP receptor activity,calcium-mediated signaling,cellular response to ATP	1.62598	1.19535	6.61167	0.0267696	0.241129	1
ENSCAFG00845000830	ALPK2	483966	alpha kinase 2 [Source:HGNC Symbol;Acc:HGNC:20565]	protein_coding	GO:0005524,GO:0006468,GO:0004674,GO:0016323,GO:0010468,GO:0003308,GO:0042981,GO:0003007,GO:0030010,GO:0055013,GO:1905223	ATP binding,protein phosphorylation,protein serine/threonine kinase activity,basolateral plasma membrane,regulation of gene expression,negative regulation of Wnt signaling pathway involved in heart development,regulation of apoptotic process,heart morphogenesis,establishment of cell polarity,cardiac muscle cell development,epicardium morphogenesis	1.01162	1.82589	6.59946	0.0268814	0.241559	1
ENSCAFG00845018026		NA		protein_coding	GO:0007165	signal transduction	1.3787	1.68949	6.59465	0.0269255	0.241593	1
ENSCAFG00845026533	CCNB3	449494	cyclin B3 [Source:NCBI gene (formerly Entrezgene);Acc:449494]	protein_coding	GO:0019901,GO:0000079,GO:0010389,GO:0016607	protein kinase binding,regulation of cyclin-dependent protein serine/threonine kinase activity,regulation of G2/M transition of mitotic cell cycle,nuclear speck	1.08067	2.01186	6.59405	0.026931	0.241593	1
ENSCAFG00845014296	SIGLEC1	485794	sialic acid binding Ig like lectin 1 [Source:HGNC Symbol;Acc:HGNC:11127]	protein_coding			1.86799	5.1279	6.58959	0.026972	0.241742	1
ENSCAFG00845015653	H2AC13	488297		protein_coding	GO:0003677,GO:0000786,GO:0046982	DNA binding,nucleosome,protein heterodimerization activity	1.64789	2.85521	6.54814	0.027357	0.243279	1
ENSCAFG00845017904		NA		protein_coding	GO:0007165	signal transduction	1.21382	1.48936	6.52932	0.0275339	0.243919	1
ENSCAFG00845013730	TMEM151A	483713	transmembrane protein 151A [Source:HGNC Symbol;Acc:HGNC:28497]	protein_coding			1.26729	-2.64687	6.50501	0.0277645	0.244432	1
ENSCAFG00845025694	RGS1	488585	regulator of G protein signaling 1 [Source:HGNC Symbol;Acc:HGNC:9991]	protein_coding	GO:0005096,GO:0008277,GO:0007165,GO:0007186,GO:0005829,GO:0005096,GO:0043547,GO:0031234,GO:0009617,GO:0001965,GO:0061737	GTPase activator activity,regulation of G protein-coupled receptor signaling pathway,signal transduction,G protein-coupled receptor signaling pathway,cytosol,GTPase activator activity,positive regulation of GTPase activity,extrinsic component of cytoplasmic side of plasma membrane,response to bacterium,G-protein alpha-subunit binding,leukotriene signaling pathway	1.41523	4.58907	6.49903	0.0278217	0.244501	1
ENSCAFG00845003305	PSTPIP2	480150	proline-serine-threonine phosphatase interacting protein 2 [Source:HGNC Symbol;Acc:HGNC:9581]	protein_coding	GO:0003779,GO:0007010,GO:0016477,GO:0016020,GO:0005829,GO:0005856	actin binding,cytoskeleton organization,cell migration,membrane,cytosol,cytoskeleton	0.939452	5.86701	6.46919	0.0281087	0.245776	1
ENSCAFG00845025460	H3C8,H3C8,H3C8,H3C8,H3C8,H3C8,H3C8	119867688,115945196,106558266,106558262,106557493,611519,488263	H3 clustered histone 8 [Source:NCBI gene (formerly Entrezgene);Acc:115945196],H3 clustered histone 8 [Source:NCBI gene (formerly Entrezgene);Acc:115945196],H3 clustered histone 8 [Source:NCBI gene (formerly Entrezgene);Acc:115945196],H3 clustered histone 8 [Source:NCBI gene (formerly Entrezgene);Acc:115945196],H3 clustered histone 8 [Source:NCBI gene (formerly Entrezgene);Acc:115945196],H3 cluste…	protein_coding,protein_coding,protein_coding,protein_coding,protein_coding,protein_coding,protein_coding	GO:0003677,GO:0000786,GO:0046982	DNA binding,nucleosome,protein heterodimerization activity	2.1499	1.8127	6.46039	0.028194	0.246071	1
ENSCAFG00845028682		NA		lncRNA			3.58708	-2.50458	6.40937	0.0286949	0.247842	1
ENSCAFG00845025568	KLRA1	403478	killer cell lectin-like receptor subfamily A, member 1 [Source:NCBI gene (formerly Entrezgene);Acc:403478]	protein_coding			3.43202	3.36648	6.4067	0.0287214	0.247857	1
ENSCAFG00845005855	NCAPH	475741	non-SMC condensin I complex subunit H [Source:HGNC Symbol;Acc:HGNC:1112]	protein_coding	GO:0007076,GO:0000796,GO:0005654,GO:0005829	mitotic chromosome condensation,condensin complex,nucleoplasm,cytosol	1.00938	3.12339	6.40344	0.0287539	0.247857	1
ENSCAFG00845015705	H2AC14	611231		protein_coding	GO:0003677,GO:0000786,GO:0046982	DNA binding,nucleosome,protein heterodimerization activity	1.67871	2.49647	6.37861	0.0290022	0.248483	1
ENSCAFG00845014210		NA		protein_coding	GO:0005874,GO:0000226,GO:0005819,GO:0000281,GO:0040001	microtubule,microtubule cytoskeleton organization,spindle,mitotic cytokinesis,establishment of mitotic spindle localization	1.34088	0.516099	6.30479	0.0297559	0.251774	1
ENSCAFG00845015316		NA		lncRNA			1.54565	5.0663	6.26835	0.0301367	0.253722	1
ENSCAFG00845017886	CPLX3	611573	complexin 3 [Source:HGNC Symbol;Acc:HGNC:27652]	protein_coding	GO:0006836,GO:0019905,GO:0000149,GO:0005326,GO:0016079,GO:0030073,GO:0031630,GO:0046928,GO:0005829,GO:0005886,GO:0016020,GO:0045202,GO:0098684,GO:0098993,GO:0099029	neurotransmitter transport,syntaxin binding,SNARE binding,neurotransmitter transmembrane transporter activity,synaptic vesicle exocytosis,insulin secretion,regulation of synaptic vesicle fusion to presynaptic active zone membrane,regulation of neurotransmitter secretion,cytosol,plasma membrane,membrane,synapse,photoreceptor ribbon synapse,anchored component of synaptic vesicle membrane,anchored c…	1.55772	-0.376722	6.26285	0.0301947	0.253788	1
ENSCAFG00845016243		609249		protein_coding	GO:0005515,GO:0004806,GO:0006629,GO:0004465,GO:0052689,GO:0050746,GO:0004620	protein binding,triglyceride lipase activity,lipid metabolic process,lipoprotein lipase activity,carboxylic ester hydrolase activity,regulation of lipoprotein metabolic process,phospholipase activity	1.02735	5.25607	6.26009	0.0302238	0.253928	1
ENSCAFG00845010570	SESN2	487335	sestrin 2 [Source:HGNC Symbol;Acc:HGNC:20746]	protein_coding	GO:0005634,GO:1901031,GO:0005092,GO:0016684,GO:0032542,GO:0044877,GO:0070728,GO:0001932,GO:0006111,GO:0006635,GO:0007005,GO:0009749,GO:0016239,GO:0030308,GO:0030330,GO:0032042,GO:0032868,GO:0034198,GO:0034599,GO:0036091,GO:0042149,GO:0042593,GO:0043491,GO:0046323,GO:0070328,GO:0071230,GO:0071233,GO:0072593,GO:0098869,GO:1900182,GO:1902010,GO:1904262,GO:1904504,GO:1990253,GO:2000479,GO:0005737,GO:…	nucleus,regulation of response to reactive oxygen species,GDP-dissociation inhibitor activity,oxidoreductase activity, acting on peroxide as acceptor,sulfiredoxin activity,protein-containing complex binding,leucine binding,regulation of protein phosphorylation,regulation of gluconeogenesis,fatty acid beta-oxidation,mitochondrion organization,response to glucose,positive regulation of macroautopha…	1.09456	3.70675	6.23937	0.0304437	0.254951	1
ENSCAFG00845017670		NA		protein_coding	GO:0007165	signal transduction	1.17958	1.34925	6.2215	0.030635	0.254965	1
ENSCAFG00845024196	TRAIP	608724	TRAF interacting protein [Source:HGNC Symbol;Acc:HGNC:30764]	protein_coding	GO:0004842,GO:0042802,GO:0061630,GO:0006974,GO:0007165,GO:0010804,GO:0016567,GO:0031297,GO:0032088,GO:0032688,GO:0005654,GO:0005730,GO:0090734	ubiquitin-protein transferase activity,identical protein binding,ubiquitin protein ligase activity,cellular response to DNA damage stimulus,signal transduction,negative regulation of tumor necrosis factor-mediated signaling pathway,protein ubiquitination,replication fork processing,negative regulation of NF-kappaB transcription factor activity,negative regulation of interferon-beta production,nuc…	1.04954	1.32076	6.2131	0.0307254	0.254965	1
ENSCAFG00845015682	H3C8,H3C8,H3C8,H3C8,H3C8,H3C8	119867704,115945196,106558266,106557493,611519,488263	H3 clustered histone 8 [Source:NCBI gene (formerly Entrezgene);Acc:115945196],H3 clustered histone 8 [Source:NCBI gene (formerly Entrezgene);Acc:115945196],H3 clustered histone 8 [Source:NCBI gene (formerly Entrezgene);Acc:115945196],H3 clustered histone 8 [Source:NCBI gene (formerly Entrezgene);Acc:115945196],H3 clustered histone 8 [Source:NCBI gene (formerly Entrezgene);Acc:115945196],H3 cluste…	protein_coding,protein_coding,protein_coding,protein_coding,protein_coding,protein_coding	GO:0003677,GO:0000786,GO:0046982	DNA binding,nucleosome,protein heterodimerization activity	1.68202	0.531529	6.19149	0.0309594	0.255767	1
ENSCAFG00845002250	STAG3	489842	stromal antigen 3 [Source:HGNC Symbol;Acc:HGNC:11356]	protein_coding	GO:0005654,GO:0005730,GO:0007129,GO:0034502,GO:0000794,GO:0000795,GO:0000800,GO:0000802,GO:0001673,GO:0030893,GO:0034991	nucleoplasm,nucleolus,homologous chromosome pairing at meiosis,protein localization to chromosome,condensed nuclear chromosome,synaptonemal complex,lateral element,transverse filament,male germ cell nucleus,meiotic cohesin complex,nuclear meiotic cohesin complex	1.0782	-0.351087	6.16811	0.031215	0.256918	1
ENSCAFG00845018001		NA		lncRNA			3.17086	-0.107852	6.16056	0.0312982	0.257082	1
ENSCAFG00845003393	NEK2	480021	NIMA related kinase 2 [Source:HGNC Symbol;Acc:HGNC:7745]	protein_coding	GO:0005524,GO:0006468,GO:0004672,GO:0019903,GO:0000070,GO:0001824,GO:0007059,GO:0032212,GO:0043392,GO:0046602,GO:0046777,GO:0051299,GO:0051973,GO:0051988,GO:0090307,GO:1903126,GO:1904355,GO:0000776,GO:0000794,GO:0000922,GO:0005654,GO:0005813,GO:0030496,GO:0032991	ATP binding,protein phosphorylation,protein kinase activity,protein phosphatase binding,mitotic sister chromatid segregation,blastocyst development,chromosome segregation,positive regulation of telomere maintenance via telomerase,negative regulation of DNA binding,regulation of mitotic centrosome separation,protein autophosphorylation,centrosome separation,positive regulation of telomerase activi…	1.39657	0.788055	6.12444	0.0316994	0.258489	1
ENSCAFG00845014075		NA		lncRNA			2.02667	0.784653	6.11894	0.031761	0.258678	1
ENSCAFG00845003439		119873129		scaRNA	GO:0006396,GO:0005730,GO:0015030	RNA processing,nucleolus,Cajal body	1.05483	2.28069	6.10869	0.0318763	0.258998	1
ENSCAFG00845015845	ZWILCH	478349	zwilch kinetochore protein [Source:HGNC Symbol;Acc:HGNC:25468]	protein_coding	GO:0007093,GO:1990423,GO:0034501,GO:0007094,GO:0000776,GO:1990423	mitotic cell cycle checkpoint signaling,RZZ complex,protein localization to kinetochore,mitotic spindle assembly checkpoint signaling,kinetochore,RZZ complex	0.767988	3.19846	6.0949	0.0320322	0.259528	1
ENSCAFG00845025312	THEM5	608399	thioesterase superfamily member 5 [Source:HGNC Symbol;Acc:HGNC:26755]	protein_coding	GO:0005759,GO:0016290,GO:0035336	mitochondrial matrix,palmitoyl-CoA hydrolase activity,long-chain fatty-acyl-CoA metabolic process	2.19939	1.62054	6.08107	0.0321895	0.260135	1
ENSCAFG00845018485	PSMB9	474867	proteasome 20S subunit beta 9 [Source:NCBI gene (formerly Entrezgene);Acc:474867]	protein_coding	GO:0004298,GO:0051603,GO:0005839,GO:0004175,GO:0002376,GO:2000116,GO:0005829	threonine-type endopeptidase activity,proteolysis involved in cellular protein catabolic process,proteasome core complex,endopeptidase activity,immune system process,regulation of cysteine-type endopeptidase activity,cytosol	1.20765	3.48829	6.06724	0.0323477	0.260727	1
ENSCAFG00845030576	CELSR3	476635	cadherin EGF LAG seven-pass G-type receptor 3 [Source:HGNC Symbol;Acc:HGNC:3230]	protein_coding	GO:0007186,GO:0016021,GO:0005886,GO:0004930,GO:0016020,GO:0005509,GO:0007156,GO:0007155,GO:0007166,GO:0004888	G protein-coupled receptor signaling pathway,integral component of membrane,plasma membrane,G protein-coupled receptor activity,membrane,calcium ion binding,homophilic cell adhesion via plasma membrane adhesion molecules,cell adhesion,cell surface receptor signaling pathway,transmembrane signaling receptor activity	1.35234	-0.388394	6.05339	0.032507	0.261216	1
ENSCAFG00845028211	LIG4	485544	DNA ligase 4 [Source:HGNC Symbol;Acc:HGNC:6601]	protein_coding	GO:0003677,GO:0005524,GO:0006281,GO:0003910,GO:0006310,GO:0071897,GO:0003909,GO:0051103,GO:0008022,GO:0016874,GO:0000012,GO:0001701,GO:0002328,GO:0006266,GO:0006297,GO:0006302,GO:0006303,GO:0007417,GO:0008283,GO:0010165,GO:0010212,GO:0010332,GO:0033077,GO:0033151,GO:0033152,GO:0033153,GO:0035019,GO:0043524,GO:0045190,GO:0048146,GO:0050769,GO:0051102,GO:0051276,GO:0051402,GO:0071479,GO:0097680,GO:…	DNA binding,ATP binding,DNA repair,DNA ligase (ATP) activity,DNA recombination,DNA biosynthetic process,DNA ligase activity,DNA ligation involved in DNA repair,protein C-terminus binding,ligase activity,single strand break repair,in utero embryonic development,pro-B cell differentiation,DNA ligation,nucleotide-excision repair, DNA gap filling,double-strand break repair,double-strand break repair …	0.743631	4.38518	6.04432	0.032612	0.261402	1
ENSCAFG00845009949	OR13D1	100685888	olfactory receptor family 13 subfamily D member 1 [Source:NCBI gene (formerly Entrezgene);Acc:100685888]	protein_coding	GO:0007186,GO:0016021,GO:0004930,GO:0004984	G protein-coupled receptor signaling pathway,integral component of membrane,G protein-coupled receptor activity,olfactory receptor activity	2.67285	-2.27934	6.04343	0.0326222	0.261402	1
ENSCAFG00845019988	ORC1	100855917	origin recognition complex subunit 1 [Source:HGNC Symbol;Acc:HGNC:8487]	protein_coding	GO:0005524,GO:0003682,GO:0016887,GO:0000781,GO:0000808,GO:0005654,GO:0005664	ATP binding,chromatin binding,ATPase,chromosome, telomeric region,origin recognition complex,nucleoplasm,nuclear origin of replication recognition complex	1.29017	1.44333	6.03784	0.0326871	0.261402	1
ENSCAFG00845020455		608844		protein_coding			1.65217	1.1152	6.0346	0.0327248	0.261476	1
ENSCAFG00845008754	CDC6	480527	cell division cycle 6 [Source:HGNC Symbol;Acc:HGNC:1744]	protein_coding	GO:0005524,GO:0006270,GO:0016887,GO:0051301,GO:0000278,GO:0005829,GO:0005654,GO:0005634,GO:0045171,GO:0019900,GO:0072686,GO:0051233,GO:0030071,GO:0032467,GO:0051984,GO:0000922	ATP binding,DNA replication initiation,ATPase,cell division,mitotic cell cycle,cytosol,nucleoplasm,nucleus,intercellular bridge,kinase binding,mitotic spindle,spindle midzone,regulation of mitotic metaphase/anaphase transition,positive regulation of cytokinesis,positive regulation of chromosome segregation,spindle pole	1.3903	1.83772	5.99462	0.0331941	0.263043	1
ENSCAFG00845003521	FXYD7	106559193	FXYD domain containing ion transport regulator 7 [Source:HGNC Symbol;Acc:HGNC:4034]	protein_coding	GO:0016020,GO:0099106,GO:0043269	membrane,ion channel regulator activity,regulation of ion transport	1.57565	-0.429656	5.9657	0.0335385	0.263734	1
ENSCAFG00845015811		NA		miRNA			1.52362	1.16356	5.93327	0.03393	0.264647	1
ENSCAFG00845025774	H1-6	488266	H1.6 linker histone, cluster member [Source:HGNC Symbol;Acc:HGNC:4720]	protein_coding	GO:0003677,GO:0000786,GO:0006334	DNA binding,nucleosome,nucleosome assembly	1.35497	-0.67761	5.92357	0.0340483	0.26503	1
ENSCAFG00845011783	TRIM21	485226	tripartite motif containing 21 [Source:HGNC Symbol;Acc:HGNC:11312]	protein_coding	GO:0008270,GO:0005515,GO:0003713,GO:0004842,GO:0042802,GO:0061630,GO:0000209,GO:0006513,GO:0010508,GO:0016567,GO:0031648,GO:0032088,GO:0032092,GO:0032897,GO:0034341,GO:0045087,GO:0045787,GO:0045824,GO:0051091,GO:0051865,GO:0070534,GO:0090086,GO:1902187,GO:0005634,GO:0005654,GO:0005737,GO:0019005	zinc ion binding,protein binding,transcription coactivator activity,ubiquitin-protein transferase activity,identical protein binding,ubiquitin protein ligase activity,protein polyubiquitination,protein monoubiquitination,positive regulation of autophagy,protein ubiquitination,protein destabilization,negative regulation of NF-kappaB transcription factor activity,positive regulation of protein bind…	0.712531	3.36363	5.91829	0.0341128	0.26503	1
ENSCAFG00845021203	CCNA2	483845	cyclin A2 [Source:HGNC Symbol;Acc:HGNC:1578]	protein_coding	GO:0016538,GO:0019901,GO:0019904,GO:0000086,GO:0006275,GO:0007265,GO:0016572,GO:0044843,GO:0045893,GO:0000307,GO:0001939,GO:0001940,GO:0005634,GO:0005654,GO:0005737,GO:0005829,GO:0097124	cyclin-dependent protein serine/threonine kinase regulator activity,protein kinase binding,protein domain specific binding,G2/M transition of mitotic cell cycle,regulation of DNA replication,Ras protein signal transduction,histone phosphorylation,cell cycle G1/S phase transition,positive regulation of transcription, DNA-templated,cyclin-dependent protein kinase holoenzyme complex,female pronucleu…	1.49935	2.60306	5.91621	0.0341383	0.26503	1
ENSCAFG00845005311	TICAM2	100533188	toll like receptor adaptor molecule 2 [Source:NCBI gene (formerly Entrezgene);Acc:100533188]	protein_coding	GO:0007165,GO:0003953	signal transduction,NAD+ nucleosidase activity	0.873636	4.94078	5.91102	0.0342019	0.265203	1
ENSCAFG00845023433		NA		protein_coding			1.68505	2.40955	5.87562	0.0346399	0.266464	1
ENSCAFG00845002797	TRAF3IP3	480014	TRAF3 interacting protein 3 [Source:HGNC Symbol;Acc:HGNC:30766]	protein_coding			1.33398	3.94837	5.86355	0.0347907	0.267116	1
ENSCAFG00845015425	GFI1	490156	growth factor independent 1 transcriptional repressor [Source:NCBI gene (formerly Entrezgene);Acc:490156]	protein_coding	GO:0006355,GO:0030097,GO:0051569,GO:0000976,GO:0001227,GO:1990837,GO:0000122,GO:0010956,GO:0010977,GO:0034121,GO:0045892,GO:0070105,GO:0071222,GO:0005634,GO:0016363,GO:0016604,GO:0017053	regulation of transcription, DNA-templated,hemopoiesis,regulation of histone H3-K4 methylation,transcription cis-regulatory region binding,DNA-binding transcription repressor activity, RNA polymerase II-specific,sequence-specific double-stranded DNA binding,negative regulation of transcription by RNA polymerase II,negative regulation of calcidiol 1-monooxygenase activity,negative regulation of ne…	1.93698	1.66721	5.85268	0.0349273	0.267579	1
ENSCAFG00845016232	PDCD1LG2	609699	programmed cell death 1 ligand 2 [Source:HGNC Symbol;Acc:HGNC:18731]	protein_coding	GO:0032689,GO:0032693,GO:0046007	negative regulation of interferon-gamma production,negative regulation of interleukin-10 production,negative regulation of activated T cell proliferation	1.62191	5.49074	5.8525	0.0349295	0.267579	1
ENSCAFG00845028982	CENPA	475692	centromere protein A [Source:HGNC Symbol;Acc:HGNC:1851]	protein_coding	GO:0003677,GO:0000786,GO:0046982,GO:0000132,GO:0000281,GO:0051382,GO:0071459,GO:0000775,GO:0000776,GO:0000779,GO:0000939,GO:0005634,GO:0005654,GO:0005721	DNA binding,nucleosome,protein heterodimerization activity,establishment of mitotic spindle orientation,mitotic cytokinesis,kinetochore assembly,protein localization to chromosome, centromeric region,chromosome, centromeric region,kinetochore,condensed chromosome, centromeric region,inner kinetochore,nucleus,nucleoplasm,pericentric heterochromatin	2.02465	1.22832	5.85002	0.0349608	0.267579	1
ENSCAFG00845004172		612681		protein_coding	GO:0005524,GO:0030983,GO:0006298	ATP binding,mismatched DNA binding,mismatch repair	1.10638	1.89062	5.84929	0.03497	0.267579	1
ENSCAFG00845000629	KIF22	489938	kinesin family member 22 [Source:HGNC Symbol;Acc:HGNC:6391]	protein_coding	GO:0005524,GO:0008017,GO:0003777,GO:0007018,GO:1990939,GO:0072686,GO:0005829,GO:0007080,GO:0000785,GO:0007062,GO:0051310,GO:0005819,GO:0016607	ATP binding,microtubule binding,microtubule motor activity,microtubule-based movement,ATP-dependent microtubule motor activity,mitotic spindle,cytosol,mitotic metaphase plate congression,chromatin,sister chromatid cohesion,metaphase plate congression,spindle,nuclear speck	1.02845	1.65717	5.84021	0.0350848	0.26795	1
ENSCAFG00845018523		NA		protein_coding			1.52405	-1.94239	5.82072	0.0353325	0.268625	1
ENSCAFG00845021399		NA		protein_coding			4.2004	4.44576	5.74542	0.0363103	0.27187	1
ENSCAFG00845012500	VRK2	474605	VRK serine/threonine kinase 2 [Source:HGNC Symbol;Acc:HGNC:12719]	protein_coding	GO:0005524,GO:0006468,GO:0004672,GO:0004674,GO:0019901,GO:0019904,GO:0034599,GO:0043408,GO:0046777,GO:2000659,GO:0005634,GO:0005635,GO:0005737,GO:0005783,GO:0005789,GO:0016020,GO:0031966,GO:0032991	ATP binding,protein phosphorylation,protein kinase activity,protein serine/threonine kinase activity,protein kinase binding,protein domain specific binding,cellular response to oxidative stress,regulation of MAPK cascade,protein autophosphorylation,regulation of interleukin-1-mediated signaling pathway,nucleus,nuclear envelope,cytoplasm,endoplasmic reticulum,endoplasmic reticulum membrane,membran…	1.0555	6.45943	5.72353	0.0366006	0.272865	1
ENSCAFG00845003343	ZNF655	489855	zinc finger protein 655 [Source:HGNC Symbol;Acc:HGNC:30899]	protein_coding	GO:2000134,GO:0005634,GO:0005730,GO:0005737,GO:0006355	negative regulation of G1/S transition of mitotic cell cycle,nucleus,nucleolus,cytoplasm,regulation of transcription, DNA-templated	0.543491	6.22201	5.69989	0.0369173	0.274082	1
ENSCAFG00845002251	C6	479348	complement C6 [Source:HGNC Symbol;Acc:HGNC:1339]	protein_coding	GO:0005515,GO:0006955,GO:0005579,GO:0001701,GO:0005579	protein binding,immune response,membrane attack complex,in utero embryonic development,membrane attack complex	1.42494	6.60735	5.66891	0.0373375	0.276288	1
ENSCAFG00845025298		NA		lncRNA			1.05544	-0.0663463	5.66246	0.0374256	0.276638	1
ENSCAFG00845016098	CCNB2	478324	cyclin B2 [Source:NCBI gene (formerly Entrezgene);Acc:478324]	protein_coding	GO:0001701,GO:0007057,GO:0008315,GO:0040008,GO:0043029,GO:0048538,GO:0005737,GO:0016020	in utero embryonic development,spindle assembly involved in female meiosis I,G2/MI transition of meiotic cell cycle,regulation of growth,T cell homeostasis,thymus development,cytoplasm,membrane	1.38531	1.8356	5.65898	0.0374734	0.27689	1
ENSCAFG00845003788	VRK1	490848	VRK serine/threonine kinase 1 [Source:HGNC Symbol;Acc:HGNC:12718]	protein_coding	GO:0005524,GO:0006468,GO:0004672,GO:0005634,GO:0004674,GO:0005795,GO:0005829,GO:0005654,GO:0006468,GO:0046777,GO:0005730,GO:0031493,GO:0019901,GO:0004672,GO:0035175,GO:0072354,GO:0043987,GO:0072355,GO:0090166	ATP binding,protein phosphorylation,protein kinase activity,nucleus,protein serine/threonine kinase activity,Golgi stack,cytosol,nucleoplasm,protein phosphorylation,protein autophosphorylation,nucleolus,nucleosomal histone binding,protein kinase binding,protein kinase activity,histone kinase activity (H3-S10 specific),histone kinase activity (H3-T3 specific),histone H3-S10 phosphorylation,histone…	0.644655	4.7741	5.64057	0.0377268	0.277519	1
ENSCAFG00845020313	POLQ	488003	DNA polymerase theta [Source:HGNC Symbol;Acc:HGNC:9186]	protein_coding	GO:0003677,GO:0005524,GO:0003676,GO:0006260,GO:0003887,GO:0006261,GO:0006974,GO:0006302,GO:0003887,GO:0003887,GO:0006284,GO:0003682,GO:0017116,GO:0005829,GO:0005654,GO:0005794,GO:0051260,GO:2000042,GO:0006281,GO:0051575,GO:0016446,GO:0097681	DNA binding,ATP binding,nucleic acid binding,DNA replication,DNA-directed DNA polymerase activity,DNA-dependent DNA replication,cellular response to DNA damage stimulus,double-strand break repair,DNA-directed DNA polymerase activity,DNA-directed DNA polymerase activity,base-excision repair,chromatin binding,single-stranded DNA helicase activity,cytosol,nucleoplasm,Golgi apparatus,protein homoolig…	0.764472	3.8032	5.63924	0.0377453	0.277519	1
ENSCAFG00845004274	IL21R	608011	interleukin 21 receptor [Source:HGNC Symbol;Acc:HGNC:6006]	protein_coding	GO:0005515,GO:0016020,GO:0004896,GO:0004888	protein binding,membrane,cytokine receptor activity,transmembrane signaling receptor activity	1.81599	3.09346	5.60841	0.0381748	0.279022	1
ENSCAFG00845009709	STAT5A	490968	signal transducer and activator of transcription 5A [Source:HGNC Symbol;Acc:HGNC:11366]	protein_coding	GO:0003677,GO:0006355,GO:0007165,GO:0003700,GO:0060397,GO:0001938,GO:0038026,GO:0043536,GO:0005654,GO:0005829	DNA binding,regulation of transcription, DNA-templated,signal transduction,DNA-binding transcription factor activity,growth hormone receptor signaling pathway via JAK-STAT,positive regulation of endothelial cell proliferation,reelin-mediated signaling pathway,positive regulation of blood vessel endothelial cell migration,nucleoplasm,cytosol	0.518045	5.38634	5.59484	0.0383658	0.279704	1
ENSCAFG00845009896	OR13C2	481646	olfactory receptor family 13 subfamily C member 2 [Source:NCBI gene (formerly Entrezgene);Acc:481646]	protein_coding	GO:0007186,GO:0016021,GO:0004930,GO:0004984	G protein-coupled receptor signaling pathway,integral component of membrane,G protein-coupled receptor activity,olfactory receptor activity	3.4052	-1.2406	5.58318	0.0385307	0.280502	1
ENSCAFG00845026478	IFNAR2	100856468	interferon alpha and beta receptor subunit 2 [Source:HGNC Symbol;Acc:HGNC:5433]	protein_coding	GO:0005515,GO:0004905,GO:0019901,GO:0035455,GO:0035456,GO:0051607,GO:0060337,GO:0005887	protein binding,type I interferon receptor activity,protein kinase binding,response to interferon-alpha,response to interferon-beta,defense response to virus,type I interferon signaling pathway,integral component of plasma membrane	0.74451	5.06352	5.56621	0.0387725	0.28125	1
ENSCAFG00845005614	MTFR2	483997	mitochondrial fission regulator 2 [Source:HGNC Symbol;Acc:HGNC:21115]	protein_coding	GO:0005739,GO:0000266,GO:0007005,GO:0009060	mitochondrion,mitochondrial fission,mitochondrion organization,aerobic respiration	1.17256	2.1093	5.55518	0.0389304	0.281428	1
ENSCAFG00845025831	H2BC13,H2BC13,H2BC13,H2BC13,H2BC13,H2BC13,H2BC13,H2BC13,H2BC13	119867694,119867693,106558265,100856186,611482,611465,608682,488267,478743	,,,,,,,,	protein_coding,protein_coding,protein_coding,protein_coding,protein_coding,protein_coding,protein_coding,protein_coding,protein_coding	GO:0003677,GO:0000786,GO:0046982	DNA binding,nucleosome,protein heterodimerization activity	1.38675	6.22069	5.55145	0.0389841	0.281428	1
ENSCAFG00845025851		119866326		protein_coding			2.46615	4.29048	5.53843	0.039172	0.282144	1
ENSCAFG00845019241	CTSS	403400	cathepsin S [Source:NCBI gene (formerly Entrezgene);Acc:403400]	protein_coding	GO:0006508,GO:0008234,GO:0002250,GO:0005764,GO:0045335,GO:0001968,GO:0005615,GO:0043231,GO:0097067,GO:0043236,GO:0051603,GO:0005518,GO:0043394,GO:0034769,GO:0019886,GO:0030574,GO:0004197,GO:0006508,GO:0010447,GO:0016485,GO:0048002,GO:2001259,GO:0005770	proteolysis,cysteine-type peptidase activity,adaptive immune response,lysosome,phagocytic vesicle,fibronectin binding,extracellular space,intracellular membrane-bounded organelle,cellular response to thyroid hormone stimulus,laminin binding,proteolysis involved in cellular protein catabolic process,collagen binding,proteoglycan binding,basement membrane disassembly,antigen processing and presenta…	2.11026	7.00202	5.53413	0.0392343	0.282144	1
ENSCAFG00845016428	CDC7	479955	cell division cycle 7 [Source:HGNC Symbol;Acc:HGNC:1745]	protein_coding	GO:0005524,GO:0006468,GO:0004672,GO:0005654,GO:0005634,GO:0005737,GO:0004672,GO:0045171,GO:0010971,GO:0072686,GO:0016301,GO:0008284,GO:0010571,GO:0044770	ATP binding,protein phosphorylation,protein kinase activity,nucleoplasm,nucleus,cytoplasm,protein kinase activity,intercellular bridge,positive regulation of G2/M transition of mitotic cell cycle,mitotic spindle,kinase activity,positive regulation of cell population proliferation,positive regulation of nuclear cell cycle DNA replication,cell cycle phase transition	0.614377	3.85971	5.5329	0.0392522	0.282144	1
ENSCAFG00845028377	STOML1	487640	stomatin like 1 [Source:HGNC Symbol;Acc:HGNC:14560]	protein_coding	GO:0005886,GO:0016020	plasma membrane,membrane	0.844454	3.38665	5.53173	0.0392692	0.282144	1
ENSCAFG00845005600	MMP19	606853	matrix metallopeptidase 19 [Source:HGNC Symbol;Acc:HGNC:7165]	protein_coding	GO:0008270,GO:0006508,GO:0008237,GO:0004222,GO:0031012	zinc ion binding,proteolysis,metallopeptidase activity,metalloendopeptidase activity,extracellular matrix	1.11059	3.76766	5.51936	0.0394492	0.282913	1
ENSCAFG00845019157	CXCR3	491952	C-X-C motif chemokine receptor 3 [Source:NCBI gene (formerly Entrezgene);Acc:491952]	protein_coding	GO:0007186,GO:0016021,GO:0016494,GO:0006935,GO:0004930,GO:0006954,GO:0004950,GO:0002685,GO:0019956,GO:0007166,GO:0030155,GO:0009897,GO:0009986	G protein-coupled receptor signaling pathway,integral component of membrane,C-X-C chemokine receptor activity,chemotaxis,G protein-coupled receptor activity,inflammatory response,chemokine receptor activity,regulation of leukocyte migration,chemokine binding,cell surface receptor signaling pathway,regulation of cell adhesion,external side of plasma membrane,cell surface	1.88792	0.643462	5.51015	0.039584	0.283277	1
ENSCAFG00845004993	NKG7	100856108	natural killer cell granule protein 7 [Source:HGNC Symbol;Acc:HGNC:7830]	protein_coding	GO:0016021	integral component of membrane	3.28536	2.39785	5.50419	0.0396714	0.283401	1
ENSCAFG00845030981	SLAMF8	488631	SLAM family member 8 [Source:HGNC Symbol;Acc:HGNC:21391]	protein_coding			1.46666	2.98766	5.49785	0.0397648	0.28368	1
ENSCAFG00845004341	PRF1	489030	perforin 1 [Source:NCBI gene (formerly Entrezgene);Acc:489030]	protein_coding	GO:0005509,GO:0019835,GO:0022829,GO:0042802,GO:0001771,GO:0001913,GO:0002357,GO:0002418,GO:0051260,GO:0051607,GO:0051712,GO:0005829,GO:0016021,GO:0031410,GO:0044194	calcium ion binding,cytolysis,wide pore channel activity,identical protein binding,immunological synapse formation,T cell mediated cytotoxicity,defense response to tumor cell,immune response to tumor cell,protein homooligomerization,defense response to virus,positive regulation of killing of cells of other organism,cytosol,integral component of membrane,cytoplasmic vesicle,cytolytic granule	3.13421	1.84617	5.47087	0.0401649	0.284357	1
ENSCAFG00845020400	SGO1	610343	shugoshin 1 [Source:HGNC Symbol;Acc:HGNC:25088]	protein_coding	GO:0005634,GO:0000775,GO:0045132,GO:0071962,GO:0000922,GO:0007059,GO:0000775,GO:0000776,GO:0005813,GO:0005829,GO:0005654,GO:0010457,GO:0045132,GO:0019900,GO:0008608,GO:0071962,GO:0000779	nucleus,chromosome, centromeric region,meiotic chromosome segregation,mitotic sister chromatid cohesion, centromeric,spindle pole,chromosome segregation,chromosome, centromeric region,kinetochore,centrosome,cytosol,nucleoplasm,centriole-centriole cohesion,meiotic chromosome segregation,kinase binding,attachment of spindle microtubules to kinetochore,mitotic sister chromatid cohesion, centromeric,…	1.40069	1.49456	5.41246	0.0410482	0.287311	1
ENSCAFG00845005356	TPR	480045	translocated promoter region, nuclear basket protein [Source:HGNC Symbol;Acc:HGNC:12017]	protein_coding	GO:0006606,GO:0005737,GO:0005634,GO:0031965,GO:0005635,GO:0005643,GO:0000122,GO:0070840,GO:0005868,GO:0003729,GO:0000776,GO:0042803,GO:0006606,GO:0017056,GO:0003682,GO:0072686,GO:0032880,GO:0034605,GO:1901673,GO:0042307,GO:0051019,GO:0035457,GO:0006999,GO:0019898,GO:0007094,GO:0015631,GO:0031072,GO:0045947,GO:0006404,GO:0006405,GO:0010965,GO:0031453,GO:0031990,GO:0046832,GO:0070849,GO:0090267,GO:…	protein import into nucleus,cytoplasm,nucleus,nuclear membrane,nuclear envelope,nuclear pore,negative regulation of transcription by RNA polymerase II,dynein complex binding,cytoplasmic dynein complex,mRNA binding,kinetochore,protein homodimerization activity,protein import into nucleus,structural constituent of nuclear pore,chromatin binding,mitotic spindle,regulation of protein localization,cel…	0.483342	7.53579	5.41006	0.041085	0.287311	1
ENSCAFG00845021314		NA		lncRNA			4.10635	1.60633	5.39997	0.0412401	0.287803	1
ENSCAFG00845006803		611767		protein_coding			1.29215	0.579392	5.37383	0.0416454	0.289131	1
ENSCAFG00845005036		NA		lncRNA			1.34376	-2.18124	5.37106	0.0416885	0.289133	1
ENSCAFG00845029118	FANCB	100687493	FA complementation group B [Source:HGNC Symbol;Acc:HGNC:3583]	protein_coding	GO:0036297,GO:0043240	interstrand cross-link repair,Fanconi anaemia nuclear complex	0.574337	4.44039	5.34685	0.0420687	0.290277	1
ENSCAFG00845015635	H2BC13,H2BC13,H2BC13,H2BC13,H2BC13,H2BC13,H2BC13,H2BC13,H2BC13,H2BC13	119867696,119867694,119867693,106558265,100856186,611482,611465,608682,488267,478743	,,,,,,,,,	protein_coding,protein_coding,protein_coding,protein_coding,protein_coding,protein_coding,protein_coding,protein_coding,protein_coding,protein_coding	GO:0003677,GO:0000786,GO:0046982	DNA binding,nucleosome,protein heterodimerization activity	1.56769	2.91504	5.341	0.0421611	0.290578	1
ENSCAFG00845026227		NA		protein_coding			1.37654	1.79732	5.33953	0.0421845	0.290578	1
ENSCAFG00845003087	C9	479354	complement C9 [Source:HGNC Symbol;Acc:HGNC:1358]	protein_coding	GO:0005515,GO:0006955,GO:0005579,GO:0005886,GO:0005615,GO:0051260,GO:0005579,GO:0001906	protein binding,immune response,membrane attack complex,plasma membrane,extracellular space,protein homooligomerization,membrane attack complex,cell killing	1.13107	0.24471	5.33231	0.042299	0.290928	1
ENSCAFG00845017669	LRRC8B	479958	leucine rich repeat containing 8 VRAC subunit B [Source:HGNC Symbol;Acc:HGNC:30692]	protein_coding	GO:0005515,GO:0005737,GO:0005886,GO:0005887,GO:0034702,GO:0005225,GO:0098656	protein binding,cytoplasm,plasma membrane,integral component of plasma membrane,ion channel complex,volume-sensitive anion channel activity,anion transmembrane transport	0.582528	4.64875	5.33072	0.0423243	0.290928	1
ENSCAFG00845007749	PKHD1	474934	PKHD1 ciliary IPT domain containing fibrocystin/polyductin [Source:HGNC Symbol;Acc:HGNC:9016]	protein_coding	GO:0010824,GO:0005737,GO:0048471,GO:0005794,GO:0016324,GO:0005929,GO:0005783,GO:0000132,GO:0005813,GO:0008284,GO:0050679,GO:0051898,GO:0043066,GO:0036064,GO:0072686,GO:0070062,GO:0010824,GO:0001822,GO:0048754,GO:0032088,GO:0060271,GO:0006874,GO:0070372,GO:0045216,GO:0032006,GO:0090175,GO:1904036,GO:1904054,GO:0097731	regulation of centrosome duplication,cytoplasm,perinuclear region of cytoplasm,Golgi apparatus,apical plasma membrane,cilium,endoplasmic reticulum,establishment of mitotic spindle orientation,centrosome,positive regulation of cell population proliferation,positive regulation of epithelial cell proliferation,negative regulation of protein kinase B signaling,negative regulation of apoptotic process…	2.55042	4.11546	5.31749	0.0425353	0.291015	1
ENSCAFG00845024551		NA		lncRNA			0.74732	2.65267	5.29123	0.042958	0.292461	1
ENSCAFG00845020915	CYSLTR1	100686426	cysteinyl leukotriene receptor 1 [Source:HGNC Symbol;Acc:HGNC:17451]	protein_coding	GO:0007186,GO:0016021,GO:0004930,GO:0004974,GO:0002437,GO:0006816,GO:0006935,GO:0007166,GO:0005887	G protein-coupled receptor signaling pathway,integral component of membrane,G protein-coupled receptor activity,leukotriene receptor activity,inflammatory response to antigenic stimulus,calcium ion transport,chemotaxis,cell surface receptor signaling pathway,integral component of plasma membrane	1.2532	3.18079	5.28958	0.0429847	0.292461	1
ENSCAFG00845006599	PLAAT4	483772	phospholipase A and acyltransferase 4 [Source:HGNC Symbol;Acc:HGNC:9869]	protein_coding	GO:0006644,GO:0004623,GO:0008285,GO:0016020,GO:0008970,GO:0016410,GO:0004623,GO:0006644,GO:0016410,GO:0008970,GO:0045618,GO:0070292,GO:0150074	phospholipid metabolic process,phospholipase A2 activity,negative regulation of cell population proliferation,membrane,phospholipase A1 activity,N-acyltransferase activity,phospholipase A2 activity,phospholipid metabolic process,N-acyltransferase activity,phospholipase A1 activity,positive regulation of keratinocyte differentiation,N-acylphosphatidylethanolamine metabolic process,positive regulat…	2.05473	5.43868	5.27663	0.0431953	0.292918	1
ENSCAFG00845014130	SLC25A48	481518	solute carrier family 25 member 48 [Source:HGNC Symbol;Acc:HGNC:30451]	protein_coding	GO:0055085	transmembrane transport	1.8646	2.54535	5.22522	0.0440434	0.29581	1
ENSCAFG00845001624	PRC1	488742	protein regulator of cytokinesis 1 [Source:HGNC Symbol;Acc:HGNC:9341]	protein_coding	GO:0005856,GO:0008017,GO:0000226,GO:0001578,GO:0032465,GO:0005634,GO:0005819,GO:0030496,GO:0019901,GO:0008284,GO:0005886,GO:0005654,GO:0019894,GO:0032465,GO:0015630,GO:0045171,GO:0070938	cytoskeleton,microtubule binding,microtubule cytoskeleton organization,microtubule bundle formation,regulation of cytokinesis,nucleus,spindle,midbody,protein kinase binding,positive regulation of cell population proliferation,plasma membrane,nucleoplasm,kinesin binding,regulation of cytokinesis,microtubule cytoskeleton,intercellular bridge,contractile ring	0.791976	3.67837	5.22453	0.0440549	0.29581	1
ENSCAFG00845009246	PMCH	449022	pro-melanin concentrating hormone [Source:NCBI gene (formerly Entrezgene);Acc:449022]	protein_coding	GO:0007268,GO:0030354,GO:0007631,GO:0005634	chemical synaptic transmission,melanin-concentrating hormone activity,feeding behavior,nucleus	1.60365	-1.42046	5.20621	0.0443622	0.297161	1
ENSCAFG00845003207		490277		protein_coding	GO:0016020,GO:0006811,GO:0055085,GO:0005249,GO:0005887,GO:0006813,GO:0005216,GO:0071805	membrane,ion transport,transmembrane transport,voltage-gated potassium channel activity,integral component of plasma membrane,potassium ion transport,ion channel activity,potassium ion transmembrane transport	1.12306	3.55315	5.19263	0.0445916	0.297521	1
ENSCAFG00845010921	ADAM9,ADAM9	475579,475578	ADAM metallopeptidase domain 9 [Source:NCBI gene (formerly Entrezgene);Acc:475579],ADAM metallopeptidase domain 9 [Source:NCBI gene (formerly Entrezgene);Acc:475579]	protein_coding,protein_coding	GO:0006508,GO:0008237,GO:0004222	proteolysis,metallopeptidase activity,metalloendopeptidase activity	0.816664	9.18915	5.19115	0.0446166	0.297521	1
ENSCAFG00845009083	CCL5	403522	C-C motif chemokine ligand 5 [Source:NCBI gene (formerly Entrezgene);Acc:403522]	protein_coding	GO:0005576,GO:0006955,GO:0008009	extracellular region,immune response,chemokine activity	2.73181	4.69046	5.1719	0.0449445	0.298612	1
ENSCAFG00845024508	RIDA	475043	reactive intermediate imine deaminase A homolog [Source:HGNC Symbol;Acc:HGNC:16897]	protein_coding	GO:0005737,GO:0005634,GO:0003729,GO:0006402,GO:0061157,GO:0120242,GO:1901565	cytoplasm,nucleus,mRNA binding,mRNA catabolic process,mRNA destabilization,2-iminobutanoate deaminase activity,organonitrogen compound catabolic process	0.785935	3.64117	5.17017	0.0449742	0.29871	1
ENSCAFG00845022363	LGR5	609478	leucine rich repeat containing G protein-coupled receptor 5 [Source:HGNC Symbol;Acc:HGNC:4504]	protein_coding	GO:0005515,GO:0005887,GO:0032588,GO:0005654,GO:0005794,GO:0090263,GO:0090263,GO:0048839,GO:0001942,GO:0042127,GO:0004888,GO:2001013,GO:0009994	protein binding,integral component of plasma membrane,trans-Golgi network membrane,nucleoplasm,Golgi apparatus,positive regulation of canonical Wnt signaling pathway,positive regulation of canonical Wnt signaling pathway,inner ear development,hair follicle development,regulation of cell population proliferation,transmembrane signaling receptor activity,epithelial cell proliferation involved in re…	1.14048	4.22239	5.10818	0.0460512	0.302389	1
ENSCAFG00845027041	IL23R	609732	interleukin 23 receptor [Source:HGNC Symbol;Acc:HGNC:19100]	protein_coding	GO:0005515,GO:0005143,GO:0042019,GO:0042020,GO:0002230,GO:0002827,GO:0032496,GO:0032693,GO:0032729,GO:0032735,GO:0034341,GO:0043235,GO:0072536	protein binding,interleukin-12 receptor binding,interleukin-23 binding,interleukin-23 receptor activity,positive regulation of defense response to virus by host,positive regulation of T-helper 1 type immune response,response to lipopolysaccharide,negative regulation of interleukin-10 production,positive regulation of interferon-gamma production,positive regulation of interleukin-12 production,res…	1.96695	2.41361	5.08871	0.0463958	0.303664	1
ENSCAFG00845019691	GAN	489694	gigaxonin [Source:HGNC Symbol;Acc:HGNC:4137]	protein_coding	GO:0005515,GO:0007010,GO:0005737,GO:0016567,GO:0031463	protein binding,cytoskeleton organization,cytoplasm,protein ubiquitination,Cul3-RING ubiquitin ligase complex	0.574899	6.08282	5.07862	0.0465759	0.303862	1
ENSCAFG00845024300	EOMES	485636	eomesodermin [Source:HGNC Symbol;Acc:HGNC:3372]	protein_coding	GO:0006355,GO:0005634,GO:0003700,GO:0043565,GO:1990837,GO:0002302,GO:0007420,GO:0045944	regulation of transcription, DNA-templated,nucleus,DNA-binding transcription factor activity,sequence-specific DNA binding,sequence-specific double-stranded DNA binding,CD8-positive, alpha-beta T cell differentiation involved in immune response,brain development,positive regulation of transcription by RNA polymerase II	3.59059	1.97722	5.0731	0.0466745	0.303913	1
ENSCAFG00845009460		100686984		protein_coding	GO:0005525	GTP binding	1.36051	0.240137	5.05804	0.0469454	0.304553	1
ENSCAFG00845009576	ATAD2	475090	ATPase family AAA domain containing 2 [Source:HGNC Symbol;Acc:HGNC:30123]	protein_coding	GO:0006355,GO:0005524,GO:0005515,GO:0016887,GO:0006325,GO:0045893,GO:0005654	regulation of transcription, DNA-templated,ATP binding,protein binding,ATPase,chromatin organization,positive regulation of transcription, DNA-templated,nucleoplasm	0.786436	5.80282	5.04159	0.0472434	0.305579	1
ENSCAFG00845008495	BUB1	100682599	BUB1 mitotic checkpoint serine/threonine kinase [Source:HGNC Symbol;Acc:HGNC:1148]	protein_coding	GO:0005524,GO:0006468,GO:0004672,GO:0007094,GO:0005829,GO:0005654,GO:0043231,GO:0000776,GO:0007063,GO:0051983	ATP binding,protein phosphorylation,protein kinase activity,mitotic spindle assembly checkpoint signaling,cytosol,nucleoplasm,intracellular membrane-bounded organelle,kinetochore,regulation of sister chromatid cohesion,regulation of chromosome segregation	1.38194	3.55704	5.03796	0.0473094	0.305664	1
ENSCAFG00845028772		478984		protein_coding			2.40824	6.20321	5.03342	0.0473922	0.305927	1
ENSCAFG00845007207	UCP2	403576	uncoupling protein 2 [Source:NCBI gene (formerly Entrezgene);Acc:403576]	protein_coding	GO:0006839,GO:0031966,GO:0001666,GO:0051881,GO:0120162,GO:0005739	mitochondrial transport,mitochondrial membrane,response to hypoxia,regulation of mitochondrial membrane potential,positive regulation of cold-induced thermogenesis,mitochondrion	0.710868	6.23806	4.99693	0.0480641	0.307381	1
ENSCAFG00845015300		NA		protein_coding	GO:0003677,GO:0000786,GO:0046982	DNA binding,nucleosome,protein heterodimerization activity	2.44692	2.37813	4.98961	0.0482002	0.307563	1
ENSCAFG00845013675	FCRL4	490400	Fc receptor like 4 [Source:HGNC Symbol;Acc:HGNC:18507]	protein_coding	GO:0009986	cell surface	1.05976	1.81043	4.98654	0.0482574	0.307689	1
ENSCAFG00845002565	RFC2	489798	replication factor C subunit 2 [Source:HGNC Symbol;Acc:HGNC:9970]	protein_coding	GO:0003677,GO:0005524,GO:0006260,GO:0016887,GO:0003689,GO:0017116,GO:0019899,GO:1900264,GO:0005663,GO:0031390	DNA binding,ATP binding,DNA replication,ATPase,DNA clamp loader activity,single-stranded DNA helicase activity,enzyme binding,positive regulation of DNA-directed DNA polymerase activity,DNA replication factor C complex,Ctf18 RFC-like complex	0.610779	3.84371	4.95619	0.0488279	0.308759	1
ENSCAFG00845000854	GABRB2	489146	gamma-aminobutyric acid type A receptor subunit beta2 [Source:HGNC Symbol;Acc:HGNC:4082]	protein_coding	GO:0016021,GO:0006811,GO:0005216,GO:0004888,GO:0034220,GO:0005230,GO:0016020,GO:0004890,GO:0005886,GO:0016917,GO:0022851,GO:1904315,GO:0007214,GO:0007605,GO:0043523,GO:0043524,GO:0048666,GO:0060119,GO:0060384,GO:0090102,GO:1901215,GO:1904862,GO:0098982,GO:0099060	integral component of membrane,ion transport,ion channel activity,transmembrane signaling receptor activity,ion transmembrane transport,extracellular ligand-gated ion channel activity,membrane,GABA-A receptor activity,plasma membrane,GABA receptor activity,GABA-gated chloride ion channel activity,transmitter-gated ion channel activity involved in regulation of postsynaptic membrane potential,gamm…	2.87964	5.89625	4.95605	0.0488305	0.308759	1
ENSCAFG00845000777	CNDP2	476166	carnosine dipeptidase 2 [Source:HGNC Symbol;Acc:HGNC:24437]	protein_coding	GO:0016787,GO:0070573,GO:0008233,GO:0016805,GO:0006508,GO:0005654,GO:0005829	hydrolase activity,metallodipeptidase activity,peptidase activity,dipeptidase activity,proteolysis,nucleoplasm,cytosol	0.778954	4.74887	4.9324	0.0492808	0.309659	1
ENSCAFG00845012616	MTRF1	485465	mitochondrial translation release factor 1 [Source:HGNC Symbol;Acc:HGNC:7469]	protein_coding	GO:0003747,GO:0006415	translation release factor activity,translational termination	0.568107	5.19345	4.9173	0.0495709	0.310053	1
ENSCAFG00845002216		NA		lncRNA			2.257	-1.51342	4.91333	0.0496476	0.310053	1
ENSCAFG00845013570	KIF15	476656	kinesin family member 15 [Source:HGNC Symbol;Acc:HGNC:17273]	protein_coding	GO:0005524,GO:0008017,GO:0007018,GO:1990939	ATP binding,microtubule binding,microtubule-based movement,ATP-dependent microtubule motor activity	1.17525	2.9387	4.91095	0.0496935	0.310053	1
ENSCAFG00845022316	RSAD2	609005	radical S-adenosyl methionine domain containing 2 [Source:HGNC Symbol;Acc:HGNC:30908]	protein_coding	GO:0003824,GO:0051536,GO:0005739,GO:0005743,GO:0005789,GO:0051539,GO:0051607,GO:0005741,GO:0005783,GO:0005811,GO:0009615,GO:0009615,GO:0034165,GO:0043621,GO:0001650,GO:2000553,GO:0050709,GO:0045071,GO:0045071,GO:0035710,GO:0034157,GO:0043367	catalytic activity,iron-sulfur cluster binding,mitochondrion,mitochondrial inner membrane,endoplasmic reticulum membrane,4 iron, 4 sulfur cluster binding,defense response to virus,mitochondrial outer membrane,endoplasmic reticulum,lipid droplet,response to virus,response to virus,positive regulation of toll-like receptor 9 signaling pathway,protein self-association,fibrillar center,positive regul…	6.49748	7.14653	72.8208	4.66577e-06	0.0112005	2
ENSCAFG00845022113	OAS3	477490	2'-5'-oligoadenylate synthetase 3 [Source:NCBI gene (formerly Entrezgene);Acc:477490]	protein_coding	GO:0016779,GO:0003725,GO:0051607,GO:0005524,GO:0001730,GO:0005737,GO:0009615,GO:0005829,GO:0005886,GO:0005654,GO:0032760,GO:0003725,GO:0051607,GO:0045071,GO:0042742,GO:0071639,GO:0060339,GO:0032728,GO:0001730,GO:0071659,GO:2000342,GO:0035395,GO:0039529,GO:0039530,GO:0060700,GO:0071650	nucleotidyltransferase activity,double-stranded RNA binding,defense response to virus,ATP binding,2'-5'-oligoadenylate synthetase activity,cytoplasm,response to virus,cytosol,plasma membrane,nucleoplasm,positive regulation of tumor necrosis factor production,double-stranded RNA binding,defense response to virus,negative regulation of viral genome replication,defense response to bacterium,positive…	3.34603	7.31813	70.1902	5.5363e-06	0.0112005	2
ENSCAFG00845020316	ISG15	100855667	ISG15 ubiquitin like modifier [Source:HGNC Symbol;Acc:HGNC:4053]	protein_coding	GO:0005515,GO:0005576,GO:0051607,GO:0051607,GO:0007229,GO:0042742,GO:0045648,GO:0009615,GO:0030501,GO:0032733,GO:0032728,GO:0032729,GO:0005178,GO:0009617,GO:0031397,GO:0045071,GO:0034340,GO:0070585,GO:0019941,GO:0032020,GO:0031386,GO:0032461,GO:0032649,GO:0060339	protein binding,extracellular region,defense response to virus,defense response to virus,integrin-mediated signaling pathway,defense response to bacterium,positive regulation of erythrocyte differentiation,response to virus,positive regulation of bone mineralization,positive regulation of interleukin-10 production,positive regulation of interferon-beta production,positive regulation of interferon…	3.94593	5.73311	59.3219	1.19852e-05	0.0161088	2
ENSCAFG00845017064		NA		protein_coding	GO:0006355,GO:0005515,GO:0003700,GO:0000976	regulation of transcription, DNA-templated,protein binding,DNA-binding transcription factor activity,transcription cis-regulatory region binding	2.51002	2.00745	51.4044	2.28167e-05	0.0236705	2
ENSCAFG00845008534		475493		protein_coding	GO:0005524,GO:0003676	ATP binding,nucleic acid binding	4.68692	8.30621	51.1132	2.34002e-05	0.0236705	2
ENSCAFG00845016107	CD274	484186	CD274 molecule [Source:NCBI gene (formerly Entrezgene);Acc:484186]	protein_coding	GO:0002845,GO:0006955,GO:0007165,GO:0007166,GO:0031295,GO:0032689,GO:0032693,GO:0032733,GO:0034097,GO:0042130,GO:0046007,GO:1901998,GO:1903556,GO:1905404,GO:2000562,GO:2001186,GO:0005654,GO:0005886,GO:0009897,GO:0015629,GO:0031901,GO:0055038,GO:0070062	positive regulation of tolerance induction to tumor cell,immune response,signal transduction,cell surface receptor signaling pathway,T cell costimulation,negative regulation of interferon-gamma production,negative regulation of interleukin-10 production,positive regulation of interleukin-10 production,response to cytokine,negative regulation of T cell proliferation,negative regulation of activate…	3.00208	6.2249	48.3925	2.98055e-05	0.0274089	2
ENSCAFG00845022387	APOBEC3Z1	610245	apolipoprotein B mRNA editing enzyme, catalytic polypeptide-like 3Z1 [Source:NCBI gene (formerly Entrezgene);Acc:610245]	protein_coding	GO:0008270,GO:0016787,GO:0003824,GO:0004126,GO:0045087,GO:0016553	zinc ion binding,hydrolase activity,catalytic activity,cytidine deaminase activity,innate immune response,base conversion or substitution editing	6.44756	1.57912	42.5094	5.24228e-05	0.0441902	2
ENSCAFG00845022347	APOBEC3Z1	NA		protein_coding	GO:0008270,GO:0016787,GO:0003824,GO:0004126,GO:0045087,GO:0016553	zinc ion binding,hydrolase activity,catalytic activity,cytidine deaminase activity,innate immune response,base conversion or substitution editing	6.12996	1.26634	31.4358	0.000185224	0.0986123	2
ENSCAFG00845024687	ZNFX1	477260	zinc finger NFX1-type containing 1 [Source:HGNC Symbol;Acc:HGNC:29271]	protein_coding	GO:0008270,GO:0005634,GO:0004386,GO:0003723,GO:0051607,GO:0005741,GO:0042742,GO:0010494,GO:0002218,GO:0045071	zinc ion binding,nucleus,helicase activity,RNA binding,defense response to virus,mitochondrial outer membrane,defense response to bacterium,cytoplasmic stress granule,activation of innate immune response,negative regulation of viral genome replication	1.52791	7.63937	29.8029	0.000229599	0.104471	2
ENSCAFG00845009107	ETV7	481764	ETS variant transcription factor 7 [Source:HGNC Symbol;Acc:HGNC:18160]	protein_coding	GO:0006355,GO:0003700,GO:0043565,GO:0000977,GO:0001227,GO:1990837,GO:0000122,GO:0005654	regulation of transcription, DNA-templated,DNA-binding transcription factor activity,sequence-specific DNA binding,RNA polymerase II transcription regulatory region sequence-specific DNA binding,DNA-binding transcription repressor activity, RNA polymerase II-specific,sequence-specific double-stranded DNA binding,negative regulation of transcription by RNA polymerase II,nucleoplasm	2.41484	4.15167	29.0097	0.000255679	0.108203	2
ENSCAFG00845003672	ISG20	488729	interferon stimulated exonuclease gene 20 [Source:HGNC Symbol;Acc:HGNC:6130]	protein_coding	GO:0003676,GO:0000175,GO:0004527,GO:0008310,GO:0030619,GO:0030620,GO:0034511,GO:0000738,GO:0006401,GO:0009615,GO:0045071,GO:0051607,GO:0005634,GO:0005730,GO:0005737,GO:0015030,GO:0016605	nucleic acid binding,3'-5'-exoribonuclease activity,exonuclease activity,single-stranded DNA 3'-5' exodeoxyribonuclease activity,U1 snRNA binding,U2 snRNA binding,U3 snoRNA binding,DNA catabolic process, exonucleolytic,RNA catabolic process,response to virus,negative regulation of viral genome replication,defense response to virus,nucleus,nucleolus,cytoplasm,Cajal body,PML body	3.20147	4.94558	26.8364	0.000347432	0.127798	2
ENSCAFG00845022196	ASNS	475240		protein_coding	GO:0004066,GO:0006529	asparagine synthase (glutamine-hydrolyzing) activity,asparagine biosynthetic process	1.42557	3.19569	23.2259	0.000603927	0.149001	2
ENSCAFG00845002557	LCP2	489126	lymphocyte cytosolic protein 2 [Source:HGNC Symbol;Acc:HGNC:6529]	protein_coding	GO:0005515,GO:0045576,GO:0045860,GO:0050852,GO:0005829,GO:0005911,GO:0036398,GO:0044853	protein binding,mast cell activation,positive regulation of protein kinase activity,T cell receptor signaling pathway,cytosol,cell-cell junction,TCR signalosome,plasma membrane raft	1.87416	6.78885	23.0484	0.000621546	0.149518	2
ENSCAFG00845024918	INSL3,INSL3	610004,403436	insulin like 3 [Source:NCBI gene (formerly Entrezgene);Acc:403436],insulin like 3 [Source:NCBI gene (formerly Entrezgene);Acc:403436]	protein_coding,protein_coding	GO:0005524,GO:0016020,GO:0006468,GO:0005856,GO:0035556,GO:0004672,GO:0004713,GO:0004715,GO:0019903,GO:0035771,GO:0070670	ATP binding,membrane,protein phosphorylation,cytoskeleton,intracellular signal transduction,protein kinase activity,protein tyrosine kinase activity,non-membrane spanning protein tyrosine kinase activity,protein phosphatase binding,interleukin-4-mediated signaling pathway,response to interleukin-4	2.11769	4.40528	22.4385	0.000686928	0.15448	2
ENSCAFG00845013378		490399		protein_coding	GO:0016020,GO:0005044	membrane,scavenger receptor activity	2.79215	-0.716648	22.2299	0.00071115	0.15448	2
ENSCAFG00845023394	PHF11	485441	PHD finger protein 11 [Source:HGNC Symbol;Acc:HGNC:17024]	protein_coding	GO:0005654,GO:0031965	nucleoplasm,nuclear membrane	1.31443	6.07621	21.5243	0.00080098	0.15448	2
ENSCAFG00845026079	ACOD1	485496	aconitate decarboxylase 1 [Source:HGNC Symbol;Acc:HGNC:33904]	protein_coding	GO:0016829,GO:0047613,GO:0002760,GO:0006952,GO:0071222,GO:0072573	lyase activity,aconitate decarboxylase activity,positive regulation of antimicrobial humoral response,defense response,cellular response to lipopolysaccharide,tolerance induction to lipopolysaccharide	3.55803	4.58198	21.2556	0.000838704	0.15448	2
ENSCAFG00845001106	BIRC3	489433	baculoviral IAP repeat containing 3 [Source:NCBI gene (formerly Entrezgene);Acc:489433]	protein_coding	GO:0042981,GO:0004842,GO:0031398,GO:0060544,GO:0005634,GO:0005654,GO:0005737,GO:0005829	regulation of apoptotic process,ubiquitin-protein transferase activity,positive regulation of protein ubiquitination,regulation of necroptotic process,nucleus,nucleoplasm,cytoplasm,cytosol	3.55	7.51465	20.4077	0.00097246	0.15448	2
ENSCAFG00845029095	ATP6V1B2	486137	ATPase H+ transporting V1 subunit B2 [Source:HGNC Symbol;Acc:HGNC:854]	protein_coding	GO:0005524,GO:1902600,GO:0046034,GO:0033180,GO:0005737,GO:0005886,GO:0005829,GO:0016324,GO:0005902,GO:0000221,GO:0001726,GO:0043231	ATP binding,proton transmembrane transport,ATP metabolic process,proton-transporting V-type ATPase, V1 domain,cytoplasm,plasma membrane,cytosol,apical plasma membrane,microvillus,vacuolar proton-transporting V-type ATPase, V1 domain,ruffle,intracellular membrane-bounded organelle	1.81798	7.22057	20.0051	0.00104479	0.15448	2
ENSCAFG00845029233	ANKRD1	477764	ankyrin repeat domain 1 [Source:HGNC Symbol;Acc:HGNC:15819]	protein_coding	GO:0005515,GO:0002039,GO:0003677,GO:0003713,GO:0003714,GO:0031432,GO:0042826,GO:0061629,GO:0070412,GO:0006357,GO:0035914,GO:0035994,GO:0043065,GO:0043517,GO:0050714,GO:0055008,GO:0070528,GO:0071222,GO:0071260,GO:0071347,GO:0071356,GO:0071466,GO:0071560,GO:2000279,GO:0001650,GO:0005634,GO:0005654,GO:0005667,GO:0005737,GO:0005829,GO:0030016,GO:0031674,GO:0032991	protein binding,p53 binding,DNA binding,transcription coactivator activity,transcription corepressor activity,titin binding,histone deacetylase binding,RNA polymerase II-specific DNA-binding transcription factor binding,R-SMAD binding,regulation of transcription by RNA polymerase II,skeletal muscle cell differentiation,response to muscle stretch,positive regulation of apoptotic process,positive r…	5.29296	5.29009	19.8923	0.00106621	0.15448	2
ENSCAFG00845030191	LY9	100855726	lymphocyte antigen 9 [Source:HGNC Symbol;Acc:HGNC:6730]	protein_coding	GO:0005886,GO:0032740,GO:0072540	plasma membrane,positive regulation of interleukin-17 production,T-helper 17 cell lineage commitment	2.14237	6.25747	19.8028	0.00108357	0.15448	2
ENSCAFG00845027381	PIK3AP1	608653	phosphoinositide-3-kinase adaptor protein 1 [Source:HGNC Symbol;Acc:HGNC:30034]	protein_coding	GO:0007165,GO:0003953,GO:0016020,GO:0005829,GO:0050727,GO:0005737,GO:0014068,GO:0042802,GO:0005886,GO:0034142,GO:0034154,GO:0034162,GO:0036312,GO:0034134	signal transduction,NAD+ nucleosidase activity,membrane,cytosol,regulation of inflammatory response,cytoplasm,positive regulation of phosphatidylinositol 3-kinase signaling,identical protein binding,plasma membrane,toll-like receptor 4 signaling pathway,toll-like receptor 7 signaling pathway,toll-like receptor 9 signaling pathway,phosphatidylinositol 3-kinase regulatory subunit binding,toll-like …	2.49384	7.6966	19.569	0.00113053	0.15448	2
ENSCAFG00845030895	SLAMF9	100684400	SLAM family member 9 [Source:NCBI gene (formerly Entrezgene);Acc:100684400]	protein_coding	GO:0009986	cell surface	3.2079	3.24511	18.5452	0.00136705	0.15448	2
ENSCAFG00845007420	SNORD26	119864359	Small nucleolar RNA SNORD26 [Source:RFAM;Acc:RF00087]	snoRNA	GO:0006396,GO:0005730	RNA processing,nucleolus	1.66577	-0.459966	18.3464	0.0014196	0.15448	2
ENSCAFG00845021378	ACSL4	481018	acyl-CoA synthetase long chain family member 4 [Source:HGNC Symbol;Acc:HGNC:3571]	protein_coding	GO:0005737,GO:0006629,GO:0005811,GO:0005739,GO:0044233,GO:0060136,GO:0001676,GO:0004467,GO:0031957,GO:0047676	cytoplasm,lipid metabolic process,lipid droplet,mitochondrion,mitochondria-associated endoplasmic reticulum membrane,embryonic process involved in female pregnancy,long-chain fatty acid metabolic process,long-chain fatty acid-CoA ligase activity,very long-chain fatty acid-CoA ligase activity,arachidonate-CoA ligase activity	2.06873	9.071	18.2397	0.0014488	0.15448	2
ENSCAFG00845027087	SLC11A1	478909	solute carrier family 11 member 1 [Source:NCBI gene (formerly Entrezgene);Acc:478909]	protein_coding	GO:0016020,GO:0046873,GO:0030001,GO:0042803,GO:0045944,GO:0010628,GO:0005886,GO:0005764,GO:0001819,GO:0048255,GO:0042742,GO:0042832,GO:0055072,GO:0006954,GO:0032147,GO:0005770,GO:0001818,GO:0006909,GO:0042060,GO:0006879,GO:0009617,GO:0050766,GO:0032496,GO:0032729,GO:0030670,GO:0009617,GO:0042116,GO:0060586,GO:0050829,GO:0007035,GO:0048002,GO:0002827,GO:0006826,GO:0002309,GO:0002606,GO:0006828,GO:…	membrane,metal ion transmembrane transporter activity,metal ion transport,protein homodimerization activity,positive regulation of transcription by RNA polymerase II,positive regulation of gene expression,plasma membrane,lysosome,positive regulation of cytokine production,mRNA stabilization,defense response to bacterium,defense response to protozoan,iron ion homeostasis,inflammatory response,acti…	2.59354	6.67503	18.1914	0.00146223	0.15448	2
ENSCAFG00845008232	LCP1	476921	lymphocyte cytosolic protein 1 [Source:HGNC Symbol;Acc:HGNC:6528]	protein_coding	GO:0005515,GO:0005509,GO:0051015,GO:0051017,GO:0005178,GO:0051020,GO:0002286,GO:0010737,GO:0016477,GO:0022617,GO:0033157,GO:0071803,GO:0001725,GO:0001726,GO:0001891,GO:0002102,GO:0005737,GO:0005829,GO:0005884,GO:0005886,GO:0005925,GO:0015629,GO:0030175,GO:0032432,GO:0048471	protein binding,calcium ion binding,actin filament binding,actin filament bundle assembly,integrin binding,GTPase binding,T cell activation involved in immune response,protein kinase A signaling,cell migration,extracellular matrix disassembly,regulation of intracellular protein transport,positive regulation of podosome assembly,stress fiber,ruffle,phagocytic cup,podosome,cytoplasm,cytosol,actin f…	2.37379	8.53926	17.9997	0.0015171	0.15448	2
ENSCAFG00845004373	TRPV2	489522	transient receptor potential cation channel subfamily V member 2 [Source:HGNC Symbol;Acc:HGNC:18082]	protein_coding	GO:0016021,GO:0005886,GO:0005515,GO:0016020,GO:0006811,GO:0055085,GO:0070588,GO:0005216,GO:0009408,GO:0005262,GO:0005886,GO:0120162,GO:0009266,GO:0005261,GO:0045773,GO:0090280,GO:0009986,GO:0030424,GO:0032584,GO:0044295,GO:0044297	integral component of membrane,plasma membrane,protein binding,membrane,ion transport,transmembrane transport,calcium ion transmembrane transport,ion channel activity,response to heat,calcium channel activity,plasma membrane,positive regulation of cold-induced thermogenesis,response to temperature stimulus,cation channel activity,positive regulation of axon extension,positive regulation of calciu…	1.44664	4.79321	17.7297	0.0015986	0.15448	2
ENSCAFG00845011925	PNPT1	481376	polyribonucleotide nucleotidyltransferase 1 [Source:HGNC Symbol;Acc:HGNC:23166]	protein_coding	GO:0003723,GO:0006396,GO:0003676,GO:0006402,GO:0004654,GO:0005737,GO:0005739,GO:0051726,GO:0005758,GO:0000175,GO:0035198,GO:0045926,GO:0005829,GO:0051260,GO:0006402,GO:0070207,GO:0006401,GO:0034599,GO:0035458,GO:0061014,GO:0034046,GO:0043631,GO:0035928,GO:0000962,GO:0004654,GO:0008266,GO:0000957,GO:0000958,GO:0000958,GO:0000964,GO:0000965,GO:0035927,GO:0043457,GO:0070584,GO:0071042,GO:0097222,GO:…	RNA binding,RNA processing,nucleic acid binding,mRNA catabolic process,polyribonucleotide nucleotidyltransferase activity,cytoplasm,mitochondrion,regulation of cell cycle,mitochondrial intermembrane space,3'-5'-exoribonuclease activity,miRNA binding,negative regulation of growth,cytosol,protein homooligomerization,mRNA catabolic process,protein homotrimerization,RNA catabolic process,cellular res…	1.14635	5.66452	17.6791	0.00161447	0.15448	2
ENSCAFG00845018904	SHFL	100684218	shiftless antiviral inhibitor of ribosomal frameshifting [Source:HGNC Symbol;Acc:HGNC:25649]	protein_coding	GO:0003723,GO:0043022,GO:1990825,GO:0006449,GO:0034340,GO:0034341,GO:0034342,GO:0035456,GO:0045071,GO:0051607,GO:0075523,GO:2001125,GO:0000932,GO:0005634,GO:0005654,GO:0005737,GO:0005829	RNA binding,ribosome binding,sequence-specific mRNA binding,regulation of translational termination,response to type I interferon,response to interferon-gamma,response to type III interferon,response to interferon-beta,negative regulation of viral genome replication,defense response to virus,viral translational frameshifting,negative regulation of translational frameshifting,P-body,nucleus,nucleo…	1.62559	3.60899	17.6152	0.00163475	0.15448	2
ENSCAFG00845019148		484960		protein_coding	GO:0005576,GO:0005515,GO:0005615,GO:0004866	extracellular region,protein binding,extracellular space,endopeptidase inhibitor activity	4.03981	2.49409	17.2072	0.00177167	0.15448	2
ENSCAFG00845017050	HMGB2	486068	high mobility group box 2 [Source:HGNC Symbol;Acc:HGNC:5000]	protein_coding	GO:0003677,GO:0005634,GO:0000976,GO:0000987,GO:0003684,GO:0003690,GO:0003713,GO:0008301,GO:0019904,GO:0042056,GO:0050786,GO:0000122,GO:0001938,GO:0002437,GO:0006357,GO:0007283,GO:0007289,GO:0008584,GO:0010628,GO:0010629,GO:0032075,GO:0032496,GO:0032728,GO:0043388,GO:0045089,GO:0045648,GO:0045654,GO:0045892,GO:0045893,GO:0045944,GO:0048545,GO:0050767,GO:0050829,GO:0050830,GO:0060326,GO:0071222,GO:…	DNA binding,nucleus,transcription cis-regulatory region binding,cis-regulatory region sequence-specific DNA binding,damaged DNA binding,double-stranded DNA binding,transcription coactivator activity,DNA binding, bending,protein domain specific binding,chemoattractant activity,RAGE receptor binding,negative regulation of transcription by RNA polymerase II,positive regulation of endothelial cell pr…	1.55237	5.47598	16.5722	0.00201309	0.15448	2
ENSCAFG00845001032		NA		lncRNA			3.30751	-1.50547	15.9912	0.00226909	0.15448	2
ENSCAFG00845014862	RAP1GAP2	491204	RAP1 GTPase activating protein 2 [Source:HGNC Symbol;Acc:HGNC:29176]	protein_coding	GO:0005096,GO:0051056,GO:0005813,GO:0005886,GO:0005829,GO:0031965,GO:0008361	GTPase activator activity,regulation of small GTPase mediated signal transduction,centrosome,plasma membrane,cytosol,nuclear membrane,regulation of cell size	1.91079	6.53581	15.4521	0.00254212	0.15448	2
ENSCAFG00845017349	GPR84	100687941	G protein-coupled receptor 84 [Source:HGNC Symbol;Acc:HGNC:4535]	protein_coding	GO:0007186,GO:0016021,GO:0004930,GO:0043235	G protein-coupled receptor signaling pathway,integral component of membrane,G protein-coupled receptor activity,receptor complex	4.59249	2.42806	15.4121	0.00256388	0.15448	2
ENSCAFG00845006291	SLC16A1,SLC16A1	100686848,475856	,	protein_coding,protein_coding	GO:0022857,GO:0055085,GO:0005887,GO:0008028,GO:0015718,GO:0015129,GO:0016021	transmembrane transporter activity,transmembrane transport,integral component of plasma membrane,monocarboxylic acid transmembrane transporter activity,monocarboxylic acid transport,lactate transmembrane transporter activity,integral component of membrane	2.20619	6.36771	15.3737	0.00258504	0.15448	2
ENSCAFG00845019566		NA		protein_coding	GO:0005515,GO:0005509	protein binding,calcium ion binding	1.19848	5.81426	15.2818	0.0026364	0.15448	2
ENSCAFG00845002346		611446		protein_coding			1.88844	3.23964	15.2762	0.00263957	0.15448	2
ENSCAFG00845013476	TACC3	479079	transforming acidic coiled-coil containing protein 3 [Source:HGNC Symbol;Acc:HGNC:11524]	protein_coding	GO:0007052,GO:0005829,GO:0043231,GO:0034451,GO:0072686,GO:0060236,GO:0007091,GO:1902850	mitotic spindle organization,cytosol,intracellular membrane-bounded organelle,centriolar satellite,mitotic spindle,regulation of mitotic spindle organization,metaphase/anaphase transition of mitotic cell cycle,microtubule cytoskeleton organization involved in mitosis	1.96246	4.07911	15.1589	0.00270704	0.15448	2
ENSCAFG00845023015	SAMSN1	608104	SAM domain, SH3 domain and nuclear localization signals 1 [Source:HGNC Symbol;Acc:HGNC:10528]	protein_coding	GO:0005515,GO:0001784,GO:0002820,GO:0050732,GO:0050869,GO:0005634,GO:0005829	protein binding,phosphotyrosine residue binding,negative regulation of adaptive immune response,negative regulation of peptidyl-tyrosine phosphorylation,negative regulation of B cell activation,nucleus,cytosol	2.63498	7.19819	14.9697	0.00282025	0.15448	2
ENSCAFG00845003779		NA		protein_coding			3.48213	1.535	14.8227	0.00291218	0.15448	2
ENSCAFG00845011375	CCL2,CCL2	491148,403981	C-C motif chemokine ligand 7 [Source:NCBI gene (formerly Entrezgene);Acc:491148],C-C motif chemokine ligand 7 [Source:NCBI gene (formerly Entrezgene);Acc:491148]	protein_coding,protein_coding	GO:0005576,GO:0006955,GO:0008009	extracellular region,immune response,chemokine activity	4.51309	7.55513	14.7936	0.00293077	0.15448	2
ENSCAFG00845026582	THBS1	487486	thrombospondin 1 [Source:HGNC Symbol;Acc:HGNC:11785]	protein_coding	GO:0005576,GO:0005515,GO:0006954,GO:0005615,GO:0005509,GO:0007155,GO:0016525,GO:0008201,GO:0050840,GO:0051897,GO:0043066,GO:0008285,GO:0030335,GO:0008284,GO:0043154,GO:0031012,GO:0001968,GO:0005178,GO:0005615,GO:0009897,GO:0045766,GO:0001786,GO:0010757,GO:0030194,GO:0051918,GO:0043236,GO:0009986,GO:0008201,GO:0032760,GO:0010595,GO:0016477,GO:0002040,GO:0042327,GO:0030511,GO:0043406,GO:0043536,GO:…	extracellular region,protein binding,inflammatory response,extracellular space,calcium ion binding,cell adhesion,negative regulation of angiogenesis,heparin binding,extracellular matrix binding,positive regulation of protein kinase B signaling,negative regulation of apoptotic process,negative regulation of cell population proliferation,positive regulation of cell migration,positive regulation of …	3.42016	9.59895	14.7275	0.00297356	0.15448	2
ENSCAFG00845001112	ALDH1A3	100856346	aldehyde dehydrogenase 1 family member A3 [Source:HGNC Symbol;Acc:HGNC:409]	protein_coding	GO:0016491,GO:0016620,GO:0005737,GO:0051289,GO:0042803,GO:0004030,GO:0060324,GO:0043065,GO:0002072,GO:0002138,GO:0007626,GO:0021768,GO:0042472,GO:0042573,GO:0048048,GO:0050885,GO:0060013,GO:0060166,GO:0001758,GO:0004029,GO:0070324,GO:0070403,GO:0031076,GO:0042573,GO:0042574,GO:0043584,GO:0070384	oxidoreductase activity,oxidoreductase activity, acting on the aldehyde or oxo group of donors, NAD or NADP as acceptor,cytoplasm,protein homotetramerization,protein homodimerization activity,aldehyde dehydrogenase [NAD(P)+] activity,face development,positive regulation of apoptotic process,optic cup morphogenesis involved in camera-type eye development,retinoic acid biosynthetic process,locomoto…	1.69963	4.70894	14.7221	0.00297712	0.15448	2
ENSCAFG00845002000	NCR1	611390	natural cytotoxicity triggering receptor 1 [Source:NCBI gene (formerly Entrezgene);Acc:611390]	protein_coding			2.81582	1.0135	14.6982	0.00299277	0.15448	2
ENSCAFG00845029428	AOAH	482402	acyloxyacyl hydrolase [Source:HGNC Symbol;Acc:HGNC:548]	protein_coding	GO:0016788,GO:0050528,GO:0005509,GO:0006631,GO:0009104,GO:0043231	hydrolase activity, acting on ester bonds,acyloxyacyl hydrolase activity,calcium ion binding,fatty acid metabolic process,lipopolysaccharide catabolic process,intracellular membrane-bounded organelle	2.56018	8.03026	14.3687	0.00321942	0.15448	2
ENSCAFG00845007724	MATK	611999	megakaryocyte-associated tyrosine kinase [Source:HGNC Symbol;Acc:HGNC:6906]	protein_coding	GO:0005524,GO:0005515,GO:0006468,GO:0004672,GO:0004713	ATP binding,protein binding,protein phosphorylation,protein kinase activity,protein tyrosine kinase activity	2.14088	2.62516	14.2565	0.00330123	0.15448	2
ENSCAFG00845011117	SNX10	475261	sorting nexin 10 [Source:HGNC Symbol;Acc:HGNC:14974]	protein_coding	GO:0006886,GO:0035091	intracellular protein transport,phosphatidylinositol binding	2.14423	6.76736	14.209	0.00333665	0.15448	2
ENSCAFG00845025595	RGS2	488584	regulator of G protein signaling 2 [Source:HGNC Symbol;Acc:HGNC:9998]	protein_coding	GO:0005096,GO:0005737,GO:0045744,GO:0005886,GO:0005096,GO:0005829,GO:0005829,GO:0005886,GO:0010614,GO:0005634,GO:0055119,GO:0009898,GO:0008277,GO:0050873,GO:0043407,GO:0001965,GO:0060452,GO:0007283,GO:0010855,GO:0010519,GO:0045744,GO:0060087,GO:0140194	GTPase activator activity,cytoplasm,negative regulation of G protein-coupled receptor signaling pathway,plasma membrane,GTPase activator activity,cytosol,cytosol,plasma membrane,negative regulation of cardiac muscle hypertrophy,nucleus,relaxation of cardiac muscle,cytoplasmic side of plasma membrane,regulation of G protein-coupled receptor signaling pathway,brown fat cell differentiation,negative…	1.9252	6.64465	14.1518	0.0033798	0.15448	2
ENSCAFG00845017297	RHBDF2	483332	rhomboid 5 homolog 2 [Source:NCBI gene (formerly Entrezgene);Acc:483332]	protein_coding	GO:0016021,GO:0004252,GO:0050709,GO:0005789,GO:0005886	integral component of membrane,serine-type endopeptidase activity,negative regulation of protein secretion,endoplasmic reticulum membrane,plasma membrane	1.60025	4.62056	14.0066	0.00349253	0.15448	2
ENSCAFG00845028641	SLC2A5	489640	solute carrier family 2 member 5 [Source:HGNC Symbol;Acc:HGNC:11010]	protein_coding	GO:0016021,GO:0016020,GO:0022857,GO:0055085,GO:0005353,GO:0015755,GO:0005886,GO:0016324,GO:0005887,GO:0005353,GO:0005353,GO:0003044,GO:0009750,GO:0015755,GO:0071332,GO:1990539,GO:1990539	integral component of membrane,membrane,transmembrane transporter activity,transmembrane transport,fructose transmembrane transporter activity,fructose transmembrane transport,plasma membrane,apical plasma membrane,integral component of plasma membrane,fructose transmembrane transporter activity,fructose transmembrane transporter activity,regulation of systemic arterial blood pressure mediated by…	1.78839	1.96185	13.9862	0.00350872	0.15448	2
ENSCAFG00845006850		NA		lncRNA			2.43521	3.85086	13.9669	0.00352416	0.15448	2
ENSCAFG00845029855	FAS	486469		protein_coding	GO:0005515,GO:0007165,GO:0016020,GO:0006955,GO:0006915,GO:0004888	protein binding,signal transduction,membrane,immune response,apoptotic process,transmembrane signaling receptor activity	1.5258	5.26594	13.8851	0.0035903	0.15448	2
ENSCAFG00845012224		NA		lncRNA			2.73291	-1.77205	13.8689	0.00360358	0.15448	2
ENSCAFG00845007962	ADGRE1	485015	adhesion G protein-coupled receptor E1 [Source:NCBI gene (formerly Entrezgene);Acc:485015]	protein_coding	GO:0007186,GO:0016021,GO:0004930,GO:0005509,GO:0007166,GO:0004888	G protein-coupled receptor signaling pathway,integral component of membrane,G protein-coupled receptor activity,calcium ion binding,cell surface receptor signaling pathway,transmembrane signaling receptor activity	4.01412	8.77954	13.8682	0.00360421	0.15448	2
ENSCAFG00845030389		NA		lncRNA			2.01748	-1.15333	13.7746	0.00368209	0.15448	2
ENSCAFG00845010706	LMNB1	474663	lamin B1 [Source:HGNC Symbol;Acc:HGNC:6637]	protein_coding	GO:0005635,GO:0005634,GO:0031965,GO:0003690,GO:0043274,GO:0005654,GO:0016363,GO:0005638,GO:1990837,GO:0005637,GO:0005638,GO:0005652	nuclear envelope,nucleus,nuclear membrane,double-stranded DNA binding,phospholipase binding,nucleoplasm,nuclear matrix,lamin filament,sequence-specific double-stranded DNA binding,nuclear inner membrane,lamin filament,nuclear lamina	1.57286	6.61915	13.6554	0.00378429	0.15448	2
ENSCAFG00845008857	CCL4,CCL4	480600,448786	chemokine (C-C motif) ligand 4 [Source:NCBI gene (formerly Entrezgene);Acc:448786],chemokine (C-C motif) ligand 4 [Source:NCBI gene (formerly Entrezgene);Acc:448786]	protein_coding,protein_coding	GO:0005576,GO:0006955,GO:0008009	extracellular region,immune response,chemokine activity	5.02216	5.7804	13.5996	0.00383328	0.15448	2
ENSCAFG00845019431	SLC13A3	485910	solute carrier family 13 member 3 [Source:HGNC Symbol;Acc:HGNC:14430]	protein_coding	GO:0016020,GO:0022857,GO:0055085,GO:0005310,GO:0015139,GO:0015141,GO:0015362,GO:0017153,GO:0034634,GO:0006835,GO:0034775,GO:0071422,GO:0005886,GO:0016323	membrane,transmembrane transporter activity,transmembrane transport,dicarboxylic acid transmembrane transporter activity,alpha-ketoglutarate transmembrane transporter activity,succinate transmembrane transporter activity,high-affinity sodium:dicarboxylate symporter activity,sodium:dicarboxylate symporter activity,glutathione transmembrane transporter activity,dicarboxylic acid transport,glutathio…	2.51333	1.32387	13.433	0.0039842	0.15448	2
ENSCAFG00845009014	UPP1	480772		protein_coding	GO:0005737,GO:0003824,GO:0009116,GO:0009166,GO:0004850	cytoplasm,catalytic activity,nucleoside metabolic process,nucleotide catabolic process,uridine phosphorylase activity	2.56958	7.24096	13.414	0.00400185	0.15448	2
ENSCAFG00845008465	TCIRG1	483691	T cell immune regulator 1, ATPase H+ transporting V0 subunit a3 [Source:HGNC Symbol;Acc:HGNC:11647]	protein_coding	GO:0015078,GO:1902600,GO:0033179,GO:0000220,GO:0016324,GO:0001503,GO:0005634,GO:0010468,GO:0005886,GO:0010467,GO:0006915,GO:0030217,GO:0048872,GO:0060041,GO:0045453,GO:0006874,GO:0005764,GO:0071345,GO:0030099,GO:0006954,GO:0043029,GO:0002158,GO:0030316,GO:0033365,GO:0005770,GO:0042476,GO:0030183,GO:0061484,GO:0006914,GO:0016064,GO:0045335,GO:0030010,GO:0030667,GO:0000045,GO:0007039,GO:0010155,GO:…	proton transmembrane transporter activity,proton transmembrane transport,proton-transporting V-type ATPase, V0 domain,vacuolar proton-transporting V-type ATPase, V0 domain,apical plasma membrane,ossification,nucleus,regulation of gene expression,plasma membrane,gene expression,apoptotic process,T cell differentiation,homeostasis of number of cells,retina development in camera-type eye,bone resorp…	1.48634	5.81845	13.1533	0.00425377	0.15448	2
ENSCAFG00845010650	SLC2A6	100855702	solute carrier family 2 member 6 [Source:HGNC Symbol;Acc:HGNC:11011]	protein_coding	GO:0016021,GO:0016020,GO:0022857,GO:0055085,GO:0006110,GO:0005765	integral component of membrane,membrane,transmembrane transporter activity,transmembrane transport,regulation of glycolytic process,lysosomal membrane	1.97097	3.30495	13.1472	0.00425985	0.15448	2
ENSCAFG00845008598	HAS2	482032	hyaluronan synthase 2 [Source:HGNC Symbol;Acc:HGNC:4819]	protein_coding	GO:0005887,GO:0050501,GO:0030213,GO:0001570,GO:0008284,GO:0030212,GO:0030335,GO:0036120,GO:0036302,GO:0045226,GO:0060349,GO:0071347,GO:0071356,GO:0071498,GO:0085029,GO:0090500,GO:1900625,GO:0005737,GO:0031410,GO:0044853	integral component of plasma membrane,hyaluronan synthase activity,hyaluronan biosynthetic process,vasculogenesis,positive regulation of cell population proliferation,hyaluronan metabolic process,positive regulation of cell migration,cellular response to platelet-derived growth factor stimulus,atrioventricular canal development,extracellular polysaccharide biosynthetic process,bone morphogenesis,…	2.19283	3.90656	13.0737	0.00433442	0.15448	2
ENSCAFG00845020098	VCAN	488922	versican [Source:HGNC Symbol;Acc:HGNC:2464]	protein_coding	GO:0005509,GO:0007155,GO:0005540	calcium ion binding,cell adhesion,hyaluronic acid binding	3.09351	10.5372	13.0659	0.00434238	0.15448	2
ENSCAFG00845003785	BATF3	490283	basic leucine zipper ATF-like transcription factor 3 [Source:HGNC Symbol;Acc:HGNC:28915]	protein_coding	GO:0003677,GO:0006355,GO:0003700,GO:0006357,GO:0009615,GO:0005829,GO:0005654,GO:1990837,GO:0005730,GO:0000978,GO:0001227,GO:0000122,GO:0097028,GO:0043011	DNA binding,regulation of transcription, DNA-templated,DNA-binding transcription factor activity,regulation of transcription by RNA polymerase II,response to virus,cytosol,nucleoplasm,sequence-specific double-stranded DNA binding,nucleolus,RNA polymerase II cis-regulatory region sequence-specific DNA binding,DNA-binding transcription repressor activity, RNA polymerase II-specific,negative regulat…	3.99121	4.3805	12.7944	0.00463229	0.15448	2
ENSCAFG00845007790	PIM3	100682773	Pim-3 proto-oncogene, serine/threonine kinase [Source:HGNC Symbol;Acc:HGNC:19310]	protein_coding	GO:0005524,GO:0006468,GO:0004674,GO:0004672,GO:0043066,GO:0004674,GO:0043066,GO:0005829,GO:0006468,GO:0007346,GO:0061179	ATP binding,protein phosphorylation,protein serine/threonine kinase activity,protein kinase activity,negative regulation of apoptotic process,protein serine/threonine kinase activity,negative regulation of apoptotic process,cytosol,protein phosphorylation,regulation of mitotic cell cycle,negative regulation of insulin secretion involved in cellular response to glucose stimulus	2.2208	5.74071	12.7859	0.00464178	0.15448	2
ENSCAFG00845006723	TNFAIP3	484006	TNF alpha induced protein 3 [Source:HGNC Symbol;Acc:HGNC:11896]	protein_coding	GO:0003677,GO:0008270,GO:0016579,GO:0016567,GO:0002020,GO:0004842,GO:0004843,GO:0008022,GO:0019900,GO:0042802,GO:0043130,GO:0043621,GO:0001922,GO:0002237,GO:0002634,GO:0002677,GO:0031397,GO:0032088,GO:0032495,GO:0032691,GO:0032703,GO:0032715,GO:0032720,GO:0034140,GO:0034148,GO:0035871,GO:0043124,GO:0045732,GO:0045736,GO:0045824,GO:0048662,GO:0050728,GO:0050869,GO:0060548,GO:0070301,GO:0070429,GO:…	DNA binding,zinc ion binding,protein deubiquitination,protein ubiquitination,protease binding,ubiquitin-protein transferase activity,thiol-dependent deubiquitinase,protein C-terminus binding,kinase binding,identical protein binding,ubiquitin binding,protein self-association,B-1 B cell homeostasis,response to molecule of bacterial origin,regulation of germinal center formation,negative regulation …	3.48376	7.59607	12.7736	0.00465548	0.15448	2
ENSCAFG00845000310	HRH2	403812	histamine receptor H2 [Source:NCBI gene (formerly Entrezgene);Acc:403812]	protein_coding	GO:0007186,GO:0016021,GO:0004930,GO:0001696,GO:0004969,GO:0045907	G protein-coupled receptor signaling pathway,integral component of membrane,G protein-coupled receptor activity,gastric acid secretion,histamine receptor activity,positive regulation of vasoconstriction	2.55048	4.79361	12.7297	0.0047047	0.15448	2
ENSCAFG00845018444	CD40	403469	CD40 molecule [Source:NCBI gene (formerly Entrezgene);Acc:403469]	protein_coding	GO:0005515,GO:0038023,GO:0042113,GO:0050776,GO:0009897	protein binding,signaling receptor activity,B cell activation,regulation of immune response,external side of plasma membrane	1.91679	4.31314	12.7174	0.00471864	0.15448	2
ENSCAFG00845012109	CYB5R4	474982	cytochrome b5 reductase 4 [Source:HGNC Symbol;Acc:HGNC:20147]	protein_coding	GO:0016491,GO:0020037,GO:0004128,GO:0016174,GO:0016653,GO:0006091,GO:0006801,GO:0030073,GO:0042593,GO:0046677,GO:0048468,GO:0072593,GO:0005783,GO:0048471	oxidoreductase activity,heme binding,cytochrome-b5 reductase activity, acting on NAD(P)H,NAD(P)H oxidase H2O2-forming activity,oxidoreductase activity, acting on NAD(P)H, heme protein as acceptor,generation of precursor metabolites and energy,superoxide metabolic process,insulin secretion,glucose homeostasis,response to antibiotic,cell development,reactive oxygen species metabolic process,endopla…	0.954643	5.85064	12.6843	0.0047564	0.15448	2
ENSCAFG00845014337	WSB1	480619	WD repeat and SOCS box containing 1 [Source:HGNC Symbol;Acc:HGNC:19221]	protein_coding	GO:0005515,GO:0035556	protein binding,intracellular signal transduction	0.889539	6.61479	12.6535	0.00479185	0.15448	2
ENSCAFG00845013250	REL	474606	REL proto-oncogene, NF-kB subunit [Source:HGNC Symbol;Acc:HGNC:9954]	protein_coding	GO:0003677,GO:0006355,GO:0005737,GO:0003700,GO:0045893,GO:0007249,GO:0000978,GO:0001228,GO:0045944,GO:0010629,GO:0043123,GO:0005634,GO:0032688	DNA binding,regulation of transcription, DNA-templated,cytoplasm,DNA-binding transcription factor activity,positive regulation of transcription, DNA-templated,I-kappaB kinase/NF-kappaB signaling,RNA polymerase II cis-regulatory region sequence-specific DNA binding,DNA-binding transcription activator activity, RNA polymerase II-specific,positive regulation of transcription by RNA polymerase II,neg…	1.51534	6.14022	12.6464	0.0048001	0.15448	2
ENSCAFG00845021201	PLSCR1	611500	phospholipid scramblase 1 [Source:HGNC Symbol;Acc:HGNC:9092]	protein_coding	GO:0017128,GO:0017121,GO:0000287,GO:0001228,GO:0001618,GO:0004518,GO:0005154,GO:0005509,GO:0008270,GO:0017124,GO:0019899,GO:0032791,GO:0042609,GO:0045340,GO:0006915,GO:0010288,GO:0010628,GO:0035456,GO:0045071,GO:0045089,GO:0045944,GO:0050765,GO:0051607,GO:0070782,GO:1905820,GO:2000373,GO:0005634,GO:0005654,GO:0005730,GO:0005737,GO:0005794,GO:0005829,GO:0005886,GO:0005887,GO:0045121,GO:0048471,GO:…	phospholipid scramblase activity,plasma membrane phospholipid scrambling,magnesium ion binding,DNA-binding transcription activator activity, RNA polymerase II-specific,virus receptor activity,nuclease activity,epidermal growth factor receptor binding,calcium ion binding,zinc ion binding,SH3 domain binding,enzyme binding,lead ion binding,CD4 receptor binding,mercury ion binding,apoptotic process,r…	1.7162	5.27136	12.6239	0.00482618	0.15448	2
ENSCAFG00845008896	VAV1	485016	vav guanine nucleotide exchange factor 1 [Source:HGNC Symbol;Acc:HGNC:12657]	protein_coding	GO:0005515,GO:0005085,GO:0035556,GO:0007264,GO:0001784,GO:0140031,GO:0006909,GO:0006955,GO:0007186,GO:0007229,GO:0008361,GO:0030217,GO:0030593,GO:0042110,GO:0043087,GO:0043547,GO:0045785,GO:0045954,GO:0072593,GO:0005911	protein binding,guanyl-nucleotide exchange factor activity,intracellular signal transduction,small GTPase mediated signal transduction,phosphotyrosine residue binding,phosphorylation-dependent protein binding,phagocytosis,immune response,G protein-coupled receptor signaling pathway,integrin-mediated signaling pathway,regulation of cell size,T cell differentiation,neutrophil chemotaxis,T cell acti…	1.72686	5.57284	12.6111	0.00484112	0.15448	2
ENSCAFG00845010558	TNF	403922	tumor necrosis factor [Source:NCBI gene (formerly Entrezgene);Acc:403922]	protein_coding	GO:0005515,GO:0016020,GO:0006955,GO:0005164,GO:0000976,GO:0002020,GO:0005125,GO:0042802,GO:0000122,GO:0000165,GO:0001774,GO:0001819,GO:0001932,GO:0001934,GO:0001937,GO:0002439,GO:0002637,GO:0002719,GO:0002876,GO:0002925,GO:0006006,GO:0006919,GO:0006952,GO:0006954,GO:0006959,GO:0007254,GO:0008625,GO:0008630,GO:0009615,GO:0009887,GO:0010033,GO:0010573,GO:0010628,GO:0010629,GO:0010693,GO:0030198,GO:…	protein binding,membrane,immune response,tumor necrosis factor receptor binding,transcription cis-regulatory region binding,protease binding,cytokine activity,identical protein binding,negative regulation of transcription by RNA polymerase II,MAPK cascade,microglial cell activation,positive regulation of cytokine production,regulation of protein phosphorylation,positive regulation of protein phos…	4.03049	2.82356	12.4814	0.00499577	0.15448	2
ENSCAFG00845009440	DOK3	489087	docking protein 3 [Source:HGNC Symbol;Acc:HGNC:24583]	protein_coding	GO:0005737,GO:0007265	cytoplasm,Ras protein signal transduction	2.11403	2.60149	12.3306	0.00518293	0.156268	2
ENSCAFG00845003856	APBB1IP	477985	amyloid beta precursor protein binding family B member 1 interacting protein [Source:HGNC Symbol;Acc:HGNC:17379]	protein_coding	GO:0007165,GO:0005829,GO:0005886,GO:0042101,GO:0002291,GO:0045785	signal transduction,cytosol,plasma membrane,T cell receptor complex,T cell activation via T cell receptor contact with antigen bound to MHC molecule on antigen presenting cell,positive regulation of cell adhesion	1.95451	7.12396	12.1971	0.00535572	0.157259	2
ENSCAFG00845021273		119865045		snoRNA	GO:0006396,GO:0005730	RNA processing,nucleolus	1.37689	0.936421	12.086	0.00550483	0.157957	2
ENSCAFG00845003060	FFAR3	NA		protein_coding	GO:0007186,GO:0016021,GO:0004930,GO:0002385,GO:0002720,GO:0002879,GO:0003062,GO:0007193,GO:0032722,GO:0042593,GO:0045760,GO:0045776,GO:0046626,GO:0046885,GO:0071398,GO:0090276,GO:0016020	G protein-coupled receptor signaling pathway,integral component of membrane,G protein-coupled receptor activity,mucosal immune response,positive regulation of cytokine production involved in immune response,positive regulation of acute inflammatory response to non-antigenic stimulus,regulation of heart rate by chemical signal,adenylate cyclase-inhibiting G protein-coupled receptor signaling pathw…	4.20129	1.36755	12.0193	0.00559671	0.158294	2
ENSCAFG00845015029	BIN2	486539	bridging integrator 2 [Source:HGNC Symbol;Acc:HGNC:1053]	protein_coding	GO:0005515,GO:0005737,GO:0002102,GO:0001891,GO:0006911,GO:0060326,GO:0005543,GO:0097320,GO:0071800	protein binding,cytoplasm,podosome,phagocytic cup,phagocytosis, engulfment,cell chemotaxis,phospholipid binding,plasma membrane tubulation,podosome assembly	1.58645	5.64198	12.018	0.00559856	0.158294	2
ENSCAFG00845021419	RRAS2	476865	RAS related 2 [Source:HGNC Symbol;Acc:HGNC:17271]	protein_coding	GO:0007165,GO:0016020,GO:0005525,GO:0003924,GO:0030335,GO:1901214,GO:0009987,GO:0007265	signal transduction,membrane,GTP binding,GTPase activity,positive regulation of cell migration,regulation of neuron death,cellular process,Ras protein signal transduction	1.31488	6.74195	11.9915	0.00563549	0.158294	2
ENSCAFG00845022807	ATP8B4	487549	ATPase phospholipid transporting 8B4 (putative) [Source:HGNC Symbol;Acc:HGNC:13536]	protein_coding	GO:0016021,GO:0005524,GO:0000287,GO:0000166,GO:0015914,GO:0140326,GO:0005886,GO:0005794,GO:0140603,GO:0005215	integral component of membrane,ATP binding,magnesium ion binding,nucleotide binding,phospholipid transport,ATPase-coupled intramembrane lipid transporter activity,plasma membrane,Golgi apparatus,ATP hydrolysis activity,transporter activity	2.5584	8.94925	11.9793	0.00565264	0.158294	2
ENSCAFG00845029261		100886095		miRNA	GO:0035195	gene silencing by miRNA	2.3773	-1.21978	11.873	0.00580471	0.159058	2
ENSCAFG00845020010		NA		lncRNA			2.73321	0.681862	11.7988	0.00591386	0.159543	2
ENSCAFG00845002074		484306		protein_coding			3.29054	6.38655	11.7594	0.00597267	0.159543	2
ENSCAFG00845030660	FGF23	611773	fibroblast growth factor 23 [Source:HGNC Symbol;Acc:HGNC:3680]	protein_coding	GO:0005576,GO:0008083,GO:0008543,GO:0005104,GO:0005105,GO:0000165,GO:0010966,GO:0010980,GO:0030500,GO:0030502,GO:0030643,GO:0042369,GO:0045668,GO:0045893,GO:0055062,GO:0070374,GO:0090080,GO:0005615	extracellular region,growth factor activity,fibroblast growth factor receptor signaling pathway,fibroblast growth factor receptor binding,type 1 fibroblast growth factor receptor binding,MAPK cascade,regulation of phosphate transport,positive regulation of vitamin D 24-hydroxylase activity,regulation of bone mineralization,negative regulation of bone mineralization,cellular phosphate ion homeosta…	3.5627	0.847187	11.7372	0.00600616	0.159543	2
ENSCAFG00845014899	OTULINL	606782	OTU deubiquitinase with linear linkage specificity like [Source:HGNC Symbol;Acc:HGNC:25629]	protein_coding	GO:0005737,GO:0005635,GO:0042406	cytoplasm,nuclear envelope,extrinsic component of endoplasmic reticulum membrane	1.47337	5.29677	11.7352	0.0060093	0.159543	2
ENSCAFG00845001461	TAGAP	484059	T cell activation RhoGTPase activating protein [Source:HGNC Symbol;Acc:HGNC:15669]	protein_coding	GO:0007165	signal transduction	1.24476	4.60684	11.7042	0.00605649	0.159543	2
ENSCAFG00845026524	ARPC2	478907	actin related protein 2/3 complex subunit 2 [Source:HGNC Symbol;Acc:HGNC:705]	protein_coding	GO:0015629,GO:0030833,GO:0034314,GO:0005885,GO:0030041,GO:0030027,GO:0010592,GO:0005654,GO:0005886,GO:0045202,GO:0098978,GO:0031252,GO:0030838,GO:0005925,GO:0005768,GO:0051015,GO:0005200,GO:0034314,GO:0005885,GO:1900026,GO:0036195	actin cytoskeleton,regulation of actin filament polymerization,Arp2/3 complex-mediated actin nucleation,Arp2/3 protein complex,actin filament polymerization,lamellipodium,positive regulation of lamellipodium assembly,nucleoplasm,plasma membrane,synapse,glutamatergic synapse,cell leading edge,positive regulation of actin filament polymerization,focal adhesion,endosome,actin filament binding,struct…	1.17888	7.70999	11.6915	0.0060759	0.159545	2
ENSCAFG00845016275	GNGT1	403895	G protein subunit gamma transducin 1 [Source:NCBI gene (formerly Entrezgene);Acc:403895]	protein_coding	GO:0007186,GO:0031681,GO:0005834,GO:0042462,GO:0008104,GO:0007602	G protein-coupled receptor signaling pathway,G-protein beta-subunit binding,heterotrimeric G-protein complex,eye photoreceptor cell development,protein localization,phototransduction	6.48741	2.74043	11.6473	0.00614428	0.160017	2
ENSCAFG00845009453		NA		lncRNA			1.62471	0.67199	11.5658	0.00627265	0.161082	2
ENSCAFG00845006468	CHST11	481299	carbohydrate sulfotransferase 11 [Source:HGNC Symbol;Acc:HGNC:17422]	protein_coding	GO:0016021,GO:0008146,GO:0016051,GO:0030206,GO:0001701,GO:0043066,GO:0007585,GO:0048589,GO:0042733,GO:0048704,GO:0009791,GO:0042127,GO:0030512,GO:0030326,GO:0002063,GO:0051216,GO:0036342,GO:0047756,GO:0030204,GO:0033037,GO:0048703,GO:0001537,GO:0008146,GO:0050659	integral component of membrane,sulfotransferase activity,carbohydrate biosynthetic process,chondroitin sulfate biosynthetic process,in utero embryonic development,negative regulation of apoptotic process,respiratory gaseous exchange by respiratory system,developmental growth,embryonic digit morphogenesis,embryonic skeletal system morphogenesis,post-embryonic development,regulation of cell populat…	1.66833	8.65458	11.5634	0.00627637	0.161082	2
ENSCAFG00845027860	RETN	611540	resistin [Source:HGNC Symbol;Acc:HGNC:20389]	protein_coding	GO:0005576,GO:0005179	extracellular region,hormone activity	2.67582	1.91694	11.367	0.00659946	0.161635	2
ENSCAFG00845004957	MARCKSL1	612998		protein_coding	GO:0005516	calmodulin binding	2.40302	5.23061	11.3537	0.00662205	0.161635	2
ENSCAFG00845004135	SIDT2	100856519	SID1 transmembrane family member 2 [Source:HGNC Symbol;Acc:HGNC:24272]	protein_coding	GO:0016021,GO:0005886,GO:0005765,GO:0005764,GO:0000902,GO:0042593,GO:0009749,GO:0003323,GO:0044342,GO:0061178,GO:0003725,GO:0035612,GO:0035650,GO:0051032,GO:0006401,GO:0050658	integral component of membrane,plasma membrane,lysosomal membrane,lysosome,cell morphogenesis,glucose homeostasis,response to glucose,type B pancreatic cell development,type B pancreatic cell proliferation,regulation of insulin secretion involved in cellular response to glucose stimulus,double-stranded RNA binding,AP-2 adaptor complex binding,AP-1 adaptor complex binding,nucleic acid transmembran…	0.972992	6.40593	11.2394	0.00681991	0.164144	2
ENSCAFG00845011700	PTK2B	486102	protein tyrosine kinase 2 beta [Source:HGNC Symbol;Acc:HGNC:9612]	protein_coding	GO:0005524,GO:0007165,GO:0006468,GO:0005856,GO:0004672,GO:0030500,GO:0004713,GO:0007172,GO:0005925,GO:0030155,GO:0030334,GO:0004715,GO:0042127,GO:0045765,GO:2000249,GO:0002688,GO:0031234,GO:0008022,GO:0001954,GO:0002040,GO:0002315,GO:0007166,GO:0007229,GO:0008284,GO:0008285,GO:0008360,GO:0010595,GO:0010752,GO:0010758,GO:0010976,GO:0018108,GO:0030335,GO:0030502,GO:0030838,GO:0032960,GO:0033209,GO:…	ATP binding,signal transduction,protein phosphorylation,cytoskeleton,protein kinase activity,regulation of bone mineralization,protein tyrosine kinase activity,signal complex assembly,focal adhesion,regulation of cell adhesion,regulation of cell migration,non-membrane spanning protein tyrosine kinase activity,regulation of cell population proliferation,regulation of angiogenesis,regulation of act…	1.86808	7.8762	11.2232	0.00684859	0.164358	2
ENSCAFG00845024495	SULF1	486986	sulfatase 1 [Source:NCBI gene (formerly Entrezgene);Acc:486986]	protein_coding	GO:0003824,GO:0005509,GO:0005794,GO:0005783,GO:0008484,GO:0009986,GO:0005886,GO:0005615,GO:0009986,GO:0045121,GO:0005783,GO:0008449,GO:0008449,GO:0051216,GO:0030513,GO:0001937,GO:0016525,GO:0048706,GO:0030336,GO:0004065,GO:0002063,GO:0014846,GO:0030177,GO:0030201,GO:0030201,GO:0035860,GO:0040037,GO:0040037,GO:0060384,GO:0001822,GO:0032836,GO:0060348,GO:0003094,GO:0010575,GO:0040036,GO:0048010,GO:…	catalytic activity,calcium ion binding,Golgi apparatus,endoplasmic reticulum,sulfuric ester hydrolase activity,cell surface,plasma membrane,extracellular space,cell surface,membrane raft,endoplasmic reticulum,N-acetylglucosamine-6-sulfatase activity,N-acetylglucosamine-6-sulfatase activity,cartilage development,positive regulation of BMP signaling pathway,negative regulation of endothelial cell p…	1.42922	7.51998	11.1392	0.00699945	0.164825	2
ENSCAFG00845005657	UGCG	481666	UDP-glucose ceramide glucosyltransferase [Source:NCBI gene (formerly Entrezgene);Acc:481666]	protein_coding	GO:0016757,GO:0008120,GO:0006497,GO:0006679,GO:0009966,GO:0030154,GO:0030216,GO:0033210,GO:0048666,GO:0061436,GO:0098856,GO:1903575,GO:0000139	glycosyltransferase activity,ceramide glucosyltransferase activity,protein lipidation,glucosylceramide biosynthetic process,regulation of signal transduction,cell differentiation,keratinocyte differentiation,leptin-mediated signaling pathway,neuron development,establishment of skin barrier,intestinal lipid absorption,cornified envelope assembly,Golgi membrane	1.85866	7.65449	11.1155	0.00704257	0.164825	2
ENSCAFG00845014621	SOCS3	442949	suppressor of cytokine signaling 3 [Source:NCBI gene (formerly Entrezgene);Acc:442949]	protein_coding	GO:0035556,GO:0043066,GO:0007259,GO:1990830,GO:0045597,GO:0060674,GO:0050728,GO:0060670,GO:0045595,GO:0001784,GO:0060707,GO:0001932,GO:0060708,GO:0046627,GO:0009968,GO:0042532,GO:0046426	intracellular signal transduction,negative regulation of apoptotic process,receptor signaling pathway via JAK-STAT,cellular response to leukemia inhibitory factor,positive regulation of cell differentiation,placenta blood vessel development,negative regulation of inflammatory response,branching involved in labyrinthine layer morphogenesis,regulation of cell differentiation,phosphotyrosine residue…	3.09683	4.81772	10.999	0.00725989	0.165893	2
ENSCAFG00845021709	MTHFD2	483107	methylenetetrahydrofolate dehydrogenase (NADP+ dependent) 2, methenyltetrahydrofolate cyclohydrolase [Source:HGNC Symbol;Acc:HGNC:7434]	protein_coding	GO:0003824,GO:0004488,GO:0000287,GO:0004487,GO:0042301,GO:0046653,GO:0005739	catalytic activity,methylenetetrahydrofolate dehydrogenase (NADP+) activity,magnesium ion binding,methylenetetrahydrofolate dehydrogenase (NAD+) activity,phosphate ion binding,tetrahydrofolate metabolic process,mitochondrion	2.16117	3.44101	10.9749	0.00730597	0.165893	2
ENSCAFG00845021137	NT5DC1	475036	5'-nucleotidase domain containing 1 [Source:HGNC Symbol;Acc:HGNC:21556]	protein_coding			0.798022	6.39644	10.888	0.00747456	0.167046	2
ENSCAFG00845024761	ITSN1,ITSN1	119867035,478409	,	protein_coding,protein_coding	GO:0005515,GO:0005085,GO:0005509,GO:0035556	protein binding,guanyl-nucleotide exchange factor activity,calcium ion binding,intracellular signal transduction	1.30706	8.18893	10.8622	0.00752551	0.167046	2
ENSCAFG00845000798	MMP12	611789	matrix metallopeptidase 12 [Source:NCBI gene (formerly Entrezgene);Acc:611789]	protein_coding	GO:0008270,GO:0006508,GO:0008237,GO:0004222,GO:0031012,GO:0001046,GO:0005509,GO:0005518,GO:0043565,GO:0000122,GO:0006606,GO:0010628,GO:0032727,GO:0035313,GO:0045944,GO:0048286,GO:0050691,GO:0060054,GO:0060309,GO:0060339,GO:0060340,GO:0060435,GO:0098586,GO:1904905,GO:0005615,GO:0005634,GO:0005737	zinc ion binding,proteolysis,metallopeptidase activity,metalloendopeptidase activity,extracellular matrix,core promoter sequence-specific DNA binding,calcium ion binding,collagen binding,sequence-specific DNA binding,negative regulation of transcription by RNA polymerase II,protein import into nucleus,positive regulation of gene expression,positive regulation of interferon-alpha production,wound …	3.82607	4.79297	10.765	0.00772125	0.16731	2
ENSCAFG00845005032	MTHFS	610157		protein_coding			1.40043	5.79722	10.7542	0.00774336	0.16731	2
ENSCAFG00845025658	WAS	491867		protein_coding	GO:0007015,GO:0003779,GO:2000601	actin filament organization,actin binding,positive regulation of Arp2/3 complex-mediated actin nucleation	1.36841	2.82314	10.7314	0.00779047	0.167536	2
ENSCAFG00845000910	CHSY1	488704	chondroitin sulfate synthase 1 [Source:HGNC Symbol;Acc:HGNC:17198]	protein_coding	GO:0008376,GO:0032580,GO:0016757,GO:0047238,GO:0050510,GO:0002063,GO:0009954,GO:0030206,GO:0030279,GO:0045880,GO:0051216,GO:0051923,GO:0060349,GO:0005576	acetylgalactosaminyltransferase activity,Golgi cisterna membrane,glycosyltransferase activity,glucuronosyl-N-acetylgalactosaminyl-proteoglycan 4-beta-N-acetylgalactosaminyltransferase activity,N-acetylgalactosaminyl-proteoglycan 3-beta-glucuronosyltransferase activity,chondrocyte development,proximal/distal pattern formation,chondroitin sulfate biosynthetic process,negative regulation of ossifica…	1.33477	6.49724	10.7264	0.00780085	0.167536	2
ENSCAFG00845012726	LITAF	490004	lipopolysaccharide induced TNF factor [Source:HGNC Symbol;Acc:HGNC:16841]	protein_coding	GO:0005886,GO:0005794,GO:0008270,GO:0050699,GO:0005654,GO:0043231,GO:0000978,GO:0001228,GO:0045944,GO:0001817,GO:0071222,GO:0009898,GO:0032496,GO:1901223,GO:0005765,GO:0098559,GO:0098560,GO:0098574	plasma membrane,Golgi apparatus,zinc ion binding,WW domain binding,nucleoplasm,intracellular membrane-bounded organelle,RNA polymerase II cis-regulatory region sequence-specific DNA binding,DNA-binding transcription activator activity, RNA polymerase II-specific,positive regulation of transcription by RNA polymerase II,regulation of cytokine production,cellular response to lipopolysaccharide,cyto…	1.5231	7.60379	10.7057	0.00784374	0.167922	2
ENSCAFG00845008045	CSF2RB	481276	colony stimulating factor 2 receptor subunit beta [Source:HGNC Symbol;Acc:HGNC:2436]	protein_coding	GO:0005515,GO:0016020,GO:0004896	protein binding,membrane,cytokine receptor activity	2.37876	7.04763	10.6754	0.00790715	0.168389	2
ENSCAFG00845015887	JAK2	484185	Janus kinase 2 [Source:HGNC Symbol;Acc:HGNC:6192]	protein_coding	GO:0005524,GO:0016020,GO:0006468,GO:0005856,GO:0035556,GO:0004672,GO:0004713,GO:0004715,GO:0042393,GO:0005634,GO:0007165,GO:0020037,GO:0030218,GO:0042393,GO:0019221,GO:0032496,GO:0033209,GO:0034612,GO:0005886,GO:0005654,GO:0042802,GO:0035556,GO:0043066,GO:0014068,GO:0018108,GO:0045944,GO:0005925,GO:0046777,GO:0120162,GO:0032760,GO:0030154,GO:0032731,GO:0005737,GO:0019901,GO:0008285,GO:0050731,GO:…	ATP binding,membrane,protein phosphorylation,cytoskeleton,intracellular signal transduction,protein kinase activity,protein tyrosine kinase activity,non-membrane spanning protein tyrosine kinase activity,histone binding,nucleus,signal transduction,heme binding,erythrocyte differentiation,histone binding,cytokine-mediated signaling pathway,response to lipopolysaccharide,tumor necrosis factor-media…	1.03946	8.34223	10.663	0.00793335	0.168552	2
ENSCAFG00845016825	TRIB3	485819	tribbles pseudokinase 3 [Source:HGNC Symbol;Acc:HGNC:16228]	protein_coding	GO:0005524,GO:0006468,GO:0004672,GO:0003714,GO:0019901,GO:0045892,GO:0043405,GO:0070059,GO:0005654,GO:0019899,GO:0005634,GO:0032092,GO:0031625,GO:0034976,GO:0003714,GO:0006469,GO:0032869,GO:0000122,GO:0045599,GO:0055106,GO:0010827,GO:0045717,GO:0051443	ATP binding,protein phosphorylation,protein kinase activity,transcription corepressor activity,protein kinase binding,negative regulation of transcription, DNA-templated,regulation of MAP kinase activity,intrinsic apoptotic signaling pathway in response to endoplasmic reticulum stress,nucleoplasm,enzyme binding,nucleus,positive regulation of protein binding,ubiquitin protein ligase binding,respon…	2.59346	2.17981	10.659	0.00794186	0.168552	2
ENSCAFG00845029491	ADAMTS4	488651	ADAM metallopeptidase with thrombospondin type 1 motif 4 [Source:HGNC Symbol;Acc:HGNC:220]	protein_coding	GO:0006508,GO:0008237,GO:0004222,GO:0002020,GO:0008233,GO:0005615,GO:0016607	proteolysis,metallopeptidase activity,metalloendopeptidase activity,protease binding,peptidase activity,extracellular space,nuclear speck	5.03772	4.68482	10.656	0.00794814	0.168552	2
ENSCAFG00845002530		100686271		protein_coding			2.22619	4.05617	10.6196	0.00802576	0.168871	2
ENSCAFG00845003248	TNFRSF12A	610734	TNF receptor superfamily member 12A [Source:NCBI gene (formerly Entrezgene);Acc:610734]	protein_coding	GO:0005886,GO:0005515,GO:0043065,GO:0043065,GO:2001238,GO:0061041	plasma membrane,protein binding,positive regulation of apoptotic process,positive regulation of apoptotic process,positive regulation of extrinsic apoptotic signaling pathway,regulation of wound healing	2.23386	4.48775	10.5847	0.00810086	0.168871	2
ENSCAFG00845001862		119869994		protein_coding	GO:0005516	calmodulin binding	2.44611	2.80235	10.5568	0.00816159	0.168871	2
ENSCAFG00845021166		NA		protein_coding	GO:0006355,GO:0005634,GO:0005668	regulation of transcription, DNA-templated,nucleus,RNA polymerase transcription factor SL1 complex	0.91397	3.89242	10.5556	0.00816417	0.168871	2
ENSCAFG00845010485	PIM1,PIM1	119881670,481772	Pim-1 proto-onco, serine/threonine kinase [Source:NCBI gene (formerly Entrezgene);Acc:481772],Pim-1 proto-onco, serine/threonine kinase [Source:NCBI gene (formerly Entrezgene);Acc:481772]	protein_coding,protein_coding	GO:0005524,GO:0006468,GO:0004672,GO:0004674,GO:0043066	ATP binding,protein phosphorylation,protein kinase activity,protein serine/threonine kinase activity,negative regulation of apoptotic process	2.16113	6.73043	10.5136	0.00825674	0.169758	2
ENSCAFG00845001639	BAZ1A	480287		protein_coding	GO:0005515,GO:0006338	protein binding,chromatin remodeling	1.17006	7.36065	10.4728	0.00834781	0.170983	2
ENSCAFG00845026218	PTPN1	477263	protein tyrosine phosphatase non-receptor type 1 [Source:HGNC Symbol;Acc:HGNC:9642]	protein_coding	GO:0016791,GO:0004725,GO:0006470,GO:0016311,GO:0005886,GO:0004725,GO:0005769,GO:0008270,GO:0030100,GO:0019901,GO:0019899,GO:0031532,GO:0030968,GO:0005783,GO:0032991,GO:0046875,GO:0030971,GO:0033157,GO:0034976,GO:0035335,GO:0035335,GO:0043407,GO:0043507,GO:0005737,GO:0006470,GO:0097443,GO:0070373,GO:0008286,GO:0030948,GO:0035791,GO:0036498,GO:0009966,GO:0061098,GO:1902202,GO:1902236,GO:1903898,GO:…	phosphatase activity,protein tyrosine phosphatase activity,protein dephosphorylation,dephosphorylation,plasma membrane,protein tyrosine phosphatase activity,early endosome,zinc ion binding,regulation of endocytosis,protein kinase binding,enzyme binding,actin cytoskeleton reorganization,endoplasmic reticulum unfolded protein response,endoplasmic reticulum,protein-containing complex,ephrin receptor…	1.6563	8.37029	10.4592	0.00837828	0.170983	2
ENSCAFG00845027240	AADACL2	609872	arylacetamide deacetylase like 2 [Source:HGNC Symbol;Acc:HGNC:24427]	protein_coding	GO:0016021,GO:0016787,GO:0052689	integral component of membrane,hydrolase activity,carboxylic ester hydrolase activity	3.92609	1.13514	10.4567	0.00838392	0.170983	2
ENSCAFG00845011080	CKAP2L	475753	cytoskeleton associated protein 2 like [Source:HGNC Symbol;Acc:HGNC:26877]	protein_coding	GO:0005813,GO:0005829,GO:0072686	centrosome,cytosol,mitotic spindle	1.42337	4.0673	10.359	0.00860813	0.172769	2
ENSCAFG00845026934	NAMPT	100856598	nicotinamide phosphoribosyltransferase [Source:HGNC Symbol;Acc:HGNC:30092]	protein_coding	GO:0003824,GO:0004514,GO:0009435,GO:0042802,GO:0047280,GO:0007623,GO:0032922,GO:0045944,GO:0051770,GO:0005737,GO:0016607,GO:0030054	catalytic activity,nicotinate-nucleotide diphosphorylase (carboxylating) activity,NAD biosynthetic process,identical protein binding,nicotinamide phosphoribosyltransferase activity,circadian rhythm,circadian regulation of gene expression,positive regulation of transcription by RNA polymerase II,positive regulation of nitric-oxide synthase biosynthetic process,cytoplasm,nuclear speck,cell junction	2.89971	9.67856	10.3284	0.0086796	0.173343	2
ENSCAFG00845023211	PTPRC	490255		protein_coding	GO:0005515,GO:0016791,GO:0004725,GO:0006470,GO:0016311,GO:0050852	protein binding,phosphatase activity,protein tyrosine phosphatase activity,protein dephosphorylation,dephosphorylation,T cell receptor signaling pathway	2.01197	9.00765	10.2826	0.00878818	0.174308	2
ENSCAFG00845002641	EMILIN2	100684071	elastin microfibril interfacer 2 [Source:HGNC Symbol;Acc:HGNC:19881]	protein_coding	GO:0005515,GO:0005576	protein binding,extracellular region	1.96602	5.90352	10.2789	0.00879704	0.174312	2
ENSCAFG00845011217		119865435		snoRNA	GO:0006396,GO:0005730	RNA processing,nucleolus	1.72757	-1.84147	10.2417	0.00888661	0.175026	2
ENSCAFG00845009606		474890		protein_coding	GO:0005634,GO:0051726,GO:0004861,GO:0007346,GO:0072331	nucleus,regulation of cell cycle,cyclin-dependent protein serine/threonine kinase inhibitor activity,regulation of mitotic cell cycle,signal transduction by p53 class mediator	1.35503	6.4438	10.2253	0.00892649	0.175198	2
ENSCAFG00845016633	E2F3	488239	E2F transcription factor 3 [Source:HGNC Symbol;Acc:HGNC:3115]	protein_coding	GO:0006355,GO:0006357,GO:0005667,GO:0046983,GO:0000978,GO:0005634,GO:0000082,GO:0006606,GO:0045893,GO:1990837,GO:0003677,GO:0006355,GO:0001228,GO:0003700,GO:0045944,GO:0000987,GO:0008284,GO:0000977,GO:1905461,GO:0043565,GO:0090575,GO:0001216,GO:0070345	regulation of transcription, DNA-templated,regulation of transcription by RNA polymerase II,transcription regulator complex,protein dimerization activity,RNA polymerase II cis-regulatory region sequence-specific DNA binding,nucleus,G1/S transition of mitotic cell cycle,protein import into nucleus,positive regulation of transcription, DNA-templated,sequence-specific double-stranded DNA binding,DNA…	1.7191	6.09499	10.177	0.00904484	0.175584	2
ENSCAFG00845016273	FAM241A	610658	family with sequence similarity 241 member A [Source:HGNC Symbol;Acc:HGNC:26813]	protein_coding	GO:0005794	Golgi apparatus	2.01802	5.26246	10.152	0.00910702	0.175584	2
ENSCAFG00845011230		119865438		snoRNA	GO:0006396,GO:0005730	RNA processing,nucleolus	1.65222	-1.48959	10.1259	0.00917233	0.176508	2
ENSCAFG00845029113	HTR7	477762	5-hydroxytryptamine receptor 7 [Source:HGNC Symbol;Acc:HGNC:5302]	protein_coding	GO:0007186,GO:0016021,GO:0004930,GO:0004993,GO:0005887,GO:0006939,GO:0042310,GO:0007268,GO:0007623	G protein-coupled receptor signaling pathway,integral component of membrane,G protein-coupled receptor activity,G protein-coupled serotonin receptor activity,integral component of plasma membrane,smooth muscle contraction,vasoconstriction,chemical synaptic transmission,circadian rhythm	2.1039	5.24007	10.12	0.00918705	0.176508	2
ENSCAFG00845023026	CLEC4E	611538		protein_coding	GO:0038023,GO:0038187,GO:0051861,GO:0001819,GO:0002292,GO:0006955,GO:0038094,GO:0042742,GO:0045087,GO:0061760,GO:0005886,GO:0030670	signaling receptor activity,pattern recognition receptor activity,glycolipid binding,positive regulation of cytokine production,T cell differentiation involved in immune response,immune response,Fc-gamma receptor signaling pathway,defense response to bacterium,innate immune response,antifungal innate immune response,plasma membrane,phagocytic vesicle membrane	2.97508	5.41606	10.0955	0.00924907	0.176606	2
ENSCAFG00845010815	PTAFR	487336	platelet activating factor receptor [Source:NCBI gene (formerly Entrezgene);Acc:487336]	protein_coding	GO:0007186,GO:0016021,GO:0006935,GO:0004930,GO:0004992,GO:0007186,GO:0048015,GO:0005543,GO:0006954,GO:0032496,GO:0032959,GO:0001530,GO:0001875,GO:0004992	G protein-coupled receptor signaling pathway,integral component of membrane,chemotaxis,G protein-coupled receptor activity,platelet activating factor receptor activity,G protein-coupled receptor signaling pathway,phosphatidylinositol-mediated signaling,phospholipid binding,inflammatory response,response to lipopolysaccharide,inositol trisphosphate biosynthetic process,lipopolysaccharide binding,l…	2.40462	5.25579	10.091	0.00926049	0.176606	2
ENSCAFG00845029936	MPP1	612626	membrane palmitoylated protein 1 [Source:NCBI gene (formerly Entrezgene);Acc:612626]	protein_coding	GO:0005515	protein binding	1.11428	5.10624	10.0851	0.0092756	0.176606	2
ENSCAFG00845029145		NA		lncRNA			2.11885	-2.65691	10.0802	0.00928814	0.176606	2
ENSCAFG00845023697	SLC39A14	486124	solute carrier family 39 member 14 [Source:HGNC Symbol;Acc:HGNC:20858]	protein_coding	GO:0016020,GO:0055085,GO:0046873,GO:0030001,GO:0005886,GO:0006094,GO:0016324,GO:0005765,GO:0031901,GO:0031902,GO:0016323,GO:0098739,GO:0032869,GO:0098662,GO:0005887,GO:0016021,GO:0006882,GO:0002062,GO:0045745,GO:0071333,GO:0008286,GO:0034755,GO:0034755,GO:0006829,GO:0005385,GO:0006882,GO:0071577,GO:0010817,GO:0006826,GO:0005381,GO:0005384,GO:0005384,GO:0015086,GO:0015093,GO:0015296,GO:0033212,GO:…	membrane,transmembrane transport,metal ion transmembrane transporter activity,metal ion transport,plasma membrane,gluconeogenesis,apical plasma membrane,lysosomal membrane,early endosome membrane,late endosome membrane,basolateral plasma membrane,import across plasma membrane,cellular response to insulin stimulus,inorganic cation transmembrane transport,integral component of plasma membrane,integ…	3.22699	6.71558	10.0211	0.00944032	0.177144	2
ENSCAFG00845009482	GIMAP4	475533	GTPase, IMAP family member 4 [Source:HGNC Symbol;Acc:HGNC:21872]	protein_coding	GO:0005525,GO:0005829	GTP binding,cytosol	2.93826	4.7186	10.0096	0.00947036	0.177144	2
ENSCAFG00845014794		NA		lncRNA			1.73844	3.08565	10.0092	0.00947146	0.177144	2
ENSCAFG00845017057	IL2RG	403851	interleukin 2 receptor subunit gamma [Source:NCBI gene (formerly Entrezgene);Acc:403851]	protein_coding	GO:0005515,GO:0016020,GO:0004896	protein binding,membrane,cytokine receptor activity	2.21238	4.09244	10.0059	0.00948017	0.177144	2
ENSCAFG00845002129		NA		lncRNA			2.81611	0.642244	9.97599	0.00955866	0.177144	2
ENSCAFG00845005641		612537		protein_coding	GO:0008146	sulfotransferase activity	1.46886	0.0489084	9.94148	0.00965036	0.177144	2
ENSCAFG00845016685	B3GNT2	111097775	UDP-GlcNAc:betaGal beta-1,3-N-acetylglucosaminyltransferase 2 [Source:HGNC Symbol;Acc:HGNC:15629]	protein_coding	GO:0016020,GO:0006486,GO:0016758,GO:0008532,GO:0007411,GO:0007608,GO:0030311,GO:1990830	membrane,protein glycosylation,hexosyltransferase activity,N-acetyllactosaminide beta-1,3-N-acetylglucosaminyltransferase activity,axon guidance,sensory perception of smell,poly-N-acetyllactosamine biosynthetic process,cellular response to leukemia inhibitory factor	0.993938	6.62253	9.93325	0.00967237	0.177144	2
ENSCAFG00845004662	RAB31	608485	RAB31, member RAS oncogene family [Source:HGNC Symbol;Acc:HGNC:9771]	protein_coding	GO:0005525,GO:0003924,GO:0031623,GO:0005525,GO:0005769,GO:0032869,GO:0019003,GO:0045335,GO:0032588,GO:0043001,GO:0045055,GO:0090382	GTP binding,GTPase activity,receptor internalization,GTP binding,early endosome,cellular response to insulin stimulus,GDP binding,phagocytic vesicle,trans-Golgi network membrane,Golgi to plasma membrane protein transport,regulated exocytosis,phagosome maturation	1.2596	8.2071	9.90874	0.00973832	0.177741	2
ENSCAFG00845007842	PRDM1	481947	PR/SET domain 1 [Source:HGNC Symbol;Acc:HGNC:9346]	protein_coding	GO:0005515,GO:0048869,GO:0005737,GO:0001227,GO:0005634,GO:0001701,GO:1990837,GO:0000122,GO:0045165,GO:0010629,GO:1990841,GO:0001822,GO:0000978,GO:0010628,GO:0042462,GO:0001227,GO:0009791,GO:0042127,GO:0003281,GO:0003279,GO:0060976,GO:0048844,GO:0035904,GO:0001763,GO:0001892,GO:0001893,GO:0003170,GO:0007281,GO:0060576,GO:0060707,GO:1990654,GO:0032823,GO:0033082,GO:0051136	protein binding,cellular developmental process,cytoplasm,DNA-binding transcription repressor activity, RNA polymerase II-specific,nucleus,in utero embryonic development,sequence-specific double-stranded DNA binding,negative regulation of transcription by RNA polymerase II,cell fate commitment,negative regulation of gene expression,promoter-specific chromatin binding,kidney development,RNA polymer…	2.03613	5.07376	9.90694	0.0097432	0.177741	2
ENSCAFG00845029831	SLC2A3	403997		protein_coding	GO:0016021,GO:0016020,GO:0022857,GO:0055085,GO:0005355,GO:1904659,GO:0033300,GO:0055056,GO:0070837,GO:0002080,GO:0005737,GO:0005886	integral component of membrane,membrane,transmembrane transporter activity,transmembrane transport,glucose transmembrane transporter activity,glucose transmembrane transport,dehydroascorbic acid transmembrane transporter activity,D-glucose transmembrane transporter activity,dehydroascorbic acid transport,acrosomal membrane,cytoplasm,plasma membrane	2.4894	8.36321	9.71196	0.0102878	0.180179	2
ENSCAFG00845001335	PRKCB	489968	protein kinase C beta [Source:HGNC Symbol;Acc:HGNC:9395]	protein_coding	GO:0008270,GO:0005524,GO:0006468,GO:0035556,GO:0004674,GO:0004672,GO:0004697,GO:0005737,GO:0005634,GO:0005886,GO:0004697,GO:0030374,GO:0042393,GO:0045766,GO:0006357,GO:0050853,GO:0003682,GO:0051092,GO:0042113,GO:0005829,GO:0005654,GO:0006816,GO:0006468,GO:0004674,GO:0006874,GO:0071322,GO:0005080,GO:0005246,GO:0035403,GO:0050681,GO:0010827,GO:0010829,GO:0030949,GO:0035408,GO:0043123,GO:0050861,GO:…	zinc ion binding,ATP binding,protein phosphorylation,intracellular signal transduction,protein serine/threonine kinase activity,protein kinase activity,protein kinase C activity,cytoplasm,nucleus,plasma membrane,protein kinase C activity,nuclear receptor coactivator activity,histone binding,positive regulation of angiogenesis,regulation of transcription by RNA polymerase II,B cell receptor signal…	1.13419	7.55679	9.6445	0.0104846	0.181141	2
ENSCAFG00845002436	SBSN	612650	suprabasin [Source:HGNC Symbol;Acc:HGNC:24950]	protein_coding			4.75025	0.978075	9.57192	0.0107015	0.183001	2
ENSCAFG00845028798	PDK1	476828	pyruvate dehydrogenase kinase 1 [Source:HGNC Symbol;Acc:HGNC:8809]	protein_coding	GO:0004672,GO:0008283,GO:0004672,GO:0008631,GO:0010906,GO:0004740,GO:0010510,GO:0097411,GO:0005967	protein kinase activity,cell population proliferation,protein kinase activity,intrinsic apoptotic signaling pathway in response to oxidative stress,regulation of glucose metabolic process,pyruvate dehydrogenase (acetyl-transferring) kinase activity,regulation of acetyl-CoA biosynthetic process from pyruvate,hypoxia-inducible factor-1alpha signaling pathway,mitochondrial pyruvate dehydrogenase com…	0.854054	6.27068	9.5621	0.0107313	0.183001	2
ENSCAFG00845029893	CFLAR	488471	CASP8 and FADD like apoptosis regulator [Source:HGNC Symbol;Acc:HGNC:1876]	protein_coding	GO:0005515,GO:0042981,GO:0006508,GO:0008234,GO:0004197,GO:0005737,GO:0006915,GO:0008047,GO:0097342,GO:0002020,GO:0043123,GO:2001237,GO:1902042,GO:0060544,GO:0031264	protein binding,regulation of apoptotic process,proteolysis,cysteine-type peptidase activity,cysteine-type endopeptidase activity,cytoplasm,apoptotic process,enzyme activator activity,ripoptosome,protease binding,positive regulation of I-kappaB kinase/NF-kappaB signaling,negative regulation of extrinsic apoptotic signaling pathway,negative regulation of extrinsic apoptotic signaling pathway via d…	1.8655	7.81235	9.5572	0.0107462	0.183001	2
ENSCAFG00845028229	PCNA	477166	proliferating cell nuclear antigen [Source:HGNC Symbol;Acc:HGNC:8729]	protein_coding	GO:0003677,GO:0030337,GO:0006275,GO:0000701,GO:0003682,GO:0003684,GO:0008022,GO:0019899,GO:0030971,GO:0032139,GO:0032405,GO:0035035,GO:0042802,GO:0044877,GO:0070182,GO:0000122,GO:0006287,GO:0006298,GO:0019985,GO:0030855,GO:0031297,GO:0032077,GO:0034644,GO:0045739,GO:0045740,GO:0071466,GO:1900264,GO:1902990,GO:0000307,GO:0000785,GO:0005634,GO:0005652,GO:0005654,GO:0005657,GO:0005813,GO:0016604,GO:…	DNA binding,DNA polymerase processivity factor activity,regulation of DNA replication,purine-specific mismatch base pair DNA N-glycosylase activity,chromatin binding,damaged DNA binding,protein C-terminus binding,enzyme binding,receptor tyrosine kinase binding,dinucleotide insertion or deletion binding,MutLalpha complex binding,histone acetyltransferase binding,identical protein binding,protein-c…	1.38848	5.31425	9.51995	0.0108601	0.184013	2
ENSCAFG00845002126	SERPINB2	609604	serpin family B member 2 [Source:HGNC Symbol;Acc:HGNC:8584]	protein_coding	GO:0005615,GO:0004867,GO:0043066	extracellular space,serine-type endopeptidase inhibitor activity,negative regulation of apoptotic process	7.30013	6.08868	9.45399	0.0110655	0.184903	2
ENSCAFG00845028786	PDE4B	479540	phosphodiesterase 4B [Source:HGNC Symbol;Acc:HGNC:8781]	protein_coding	GO:0007165,GO:0004114,GO:0008081,GO:0004115,GO:0006198,GO:0030552,GO:0043015,GO:0044325,GO:0001780,GO:0030593,GO:0032729,GO:0032743,GO:0050852,GO:0050900,GO:0071222,GO:0071466,GO:0071872,GO:0086004,GO:0140199,GO:1901841,GO:1901898,GO:0000930,GO:0005813,GO:0005829,GO:0005891,GO:0008021,GO:0014069,GO:0016020,GO:0030018,GO:0043197,GO:0060076,GO:0071944	signal transduction,3',5'-cyclic-nucleotide phosphodiesterase activity,phosphoric diester hydrolase activity,3',5'-cyclic-AMP phosphodiesterase activity,cAMP catabolic process,cAMP binding,gamma-tubulin binding,ion channel binding,neutrophil homeostasis,neutrophil chemotaxis,positive regulation of interferon-gamma production,positive regulation of interleukin-2 production,T cell receptor signalin…	1.71268	7.53519	9.43752	0.0111175	0.18531	2
ENSCAFG00845012210	TNIP2	488798	TNFAIP3 interacting protein 2 [Source:HGNC Symbol;Acc:HGNC:19118]	protein_coding	GO:0070530,GO:0031593,GO:0019901,GO:0045944,GO:2000352,GO:0005829,GO:0005654,GO:0043123	K63-linked polyubiquitin modification-dependent protein binding,polyubiquitin modification-dependent protein binding,protein kinase binding,positive regulation of transcription by RNA polymerase II,negative regulation of endothelial cell apoptotic process,cytosol,nucleoplasm,positive regulation of I-kappaB kinase/NF-kappaB signaling	1.10405	4.91966	9.42856	0.0111459	0.18531	2
ENSCAFG00845000607	SERPINE1	403476	serpin family E member 1 [Source:NCBI gene (formerly Entrezgene);Acc:403476]	protein_coding	GO:0005615,GO:0004867,GO:0001525,GO:0090399,GO:0070062,GO:0005615,GO:0062023,GO:0045766,GO:0002020,GO:0004867,GO:0005102,GO:0010469,GO:0010757,GO:0010951,GO:0014912,GO:0030194,GO:0030336,GO:0032757,GO:0033629,GO:0035491,GO:0048260,GO:0050729,GO:0050829,GO:0051918,GO:0061044,GO:0071222,GO:0090026,GO:0097187,GO:1901331,GO:1902042,GO:2000098,GO:2000352,GO:0005576	extracellular space,serine-type endopeptidase inhibitor activity,angiogenesis,replicative senescence,extracellular exosome,extracellular space,collagen-containing extracellular matrix,positive regulation of angiogenesis,protease binding,serine-type endopeptidase inhibitor activity,signaling receptor binding,regulation of signaling receptor activity,negative regulation of plasminogen activation,ne…	4.66302	7.10649	9.42087	0.0111704	0.18531	2
ENSCAFG00845006050	P4HA1	479242	prolyl 4-hydroxylase subunit alpha 1 [Source:HGNC Symbol;Acc:HGNC:8546]	protein_coding	GO:0005515,GO:0005783,GO:0005506,GO:0016705,GO:0031418,GO:0004656,GO:0042802,GO:0005739,GO:0043231	protein binding,endoplasmic reticulum,iron ion binding,oxidoreductase activity, acting on paired donors, with incorporation or reduction of molecular oxygen,L-ascorbic acid binding,procollagen-proline 4-dioxygenase activity,identical protein binding,mitochondrion,intracellular membrane-bounded organelle	1.08858	7.44448	9.41257	0.0111969	0.185353	2
ENSCAFG00845027862	IL31RA,IL31RA	487212,487211	interleukin 31 receptor A [Source:HGNC Symbol;Acc:HGNC:18969],interleukin 31 receptor A [Source:HGNC Symbol;Acc:HGNC:18969]	protein_coding,protein_coding	GO:0005524,GO:0003676,GO:0003724,GO:0005515,GO:0008284,GO:0007259,GO:0009897,GO:0042531,GO:0002067,GO:0030224,GO:0002438,GO:0098542,GO:0019955	ATP binding,nucleic acid binding,RNA helicase activity,protein binding,positive regulation of cell population proliferation,receptor signaling pathway via JAK-STAT,external side of plasma membrane,positive regulation of tyrosine phosphorylation of STAT protein,glandular epithelial cell differentiation,monocyte differentiation,acute inflammatory response to antigenic stimulus,defense response to o…	2.24471	5.29098	9.40858	0.0112096	0.185353	2
ENSCAFG00845020558	PANX1	607532	pannexin 1 [Source:HGNC Symbol;Acc:HGNC:8599]	protein_coding	GO:0015267,GO:0006812,GO:0032732,GO:0006816,GO:0005783,GO:0005262,GO:0005886,GO:0032731,GO:0002931,GO:0051015,GO:0001819,GO:0005102,GO:0003779,GO:0022840,GO:0055085,GO:0015267,GO:0006812,GO:0032059,GO:0032730,GO:0032731,GO:0033198	channel activity,cation transport,positive regulation of interleukin-1 production,calcium ion transport,endoplasmic reticulum,calcium channel activity,plasma membrane,positive regulation of interleukin-1 beta production,response to ischemia,actin filament binding,positive regulation of cytokine production,signaling receptor binding,actin binding,leak channel activity,transmembrane transport,chann…	1.28221	5.24375	9.38963	0.0112704	0.185829	2
ENSCAFG00845020565	RAB20	485549	RAB20, member RAS oncogene family [Source:HGNC Symbol;Acc:HGNC:18260]	protein_coding	GO:0005525,GO:0003924,GO:0071346,GO:0090383,GO:0090385,GO:0005794,GO:0043231,GO:0045335	GTP binding,GTPase activity,cellular response to interferon-gamma,phagosome acidification,phagosome-lysosome fusion,Golgi apparatus,intracellular membrane-bounded organelle,phagocytic vesicle	2.4153	5.71856	9.38512	0.011285	0.185898	2
ENSCAFG00845026882		NA		lncRNA			1.57904	-1.44555	9.35802	0.0113727	0.186088	2
ENSCAFG00845022385	LRRC25	609889	leucine rich repeat containing 25 [Source:HGNC Symbol;Acc:HGNC:29806]	protein_coding	GO:0005515	protein binding	2.37271	3.09031	9.35148	0.011394	0.186088	2
ENSCAFG00845018981	DOCK11	492089	dedicator of cytokinesis 11 [Source:HGNC Symbol;Acc:HGNC:23483]	protein_coding	GO:0005085,GO:0007264,GO:0001782,GO:0043547,GO:0051491,GO:0005085,GO:0031267,GO:0002315	guanyl-nucleotide exchange factor activity,small GTPase mediated signal transduction,B cell homeostasis,positive regulation of GTPase activity,positive regulation of filopodium assembly,guanyl-nucleotide exchange factor activity,small GTPase binding,marginal zone B cell differentiation	0.796525	7.51917	9.35038	0.0113976	0.186088	2
ENSCAFG00845006713	AREG	475176		protein_coding	GO:0005154	epidermal growth factor receptor binding	4.95596	3.68223	9.321	0.011494	0.186275	2
ENSCAFG00845012494		NA		protein_coding			2.26742	-1.55445	9.31359	0.0115185	0.186275	2
ENSCAFG00845019227		NA		protein_coding	GO:0006355	regulation of transcription, DNA-templated	1.07263	4.44468	9.27247	0.0116553	0.187286	2
ENSCAFG00845007356	KRT25	100686957	keratin 25 [Source:NCBI gene (formerly Entrezgene);Acc:100686957]	protein_coding	GO:0005198,GO:0046982,GO:0007010,GO:0007568,GO:0031069,GO:0042633,GO:0045109	structural molecule activity,protein heterodimerization activity,cytoskeleton organization,aging,hair follicle morphogenesis,hair cycle,intermediate filament organization	2.68725	-2.75304	9.26679	0.0116743	0.187286	2
ENSCAFG00845010716	IL1R1	481328	interleukin 1 receptor type 1 [Source:HGNC Symbol;Acc:HGNC:5993]	protein_coding	GO:0007165,GO:0003953,GO:0004908,GO:0004909,GO:0002020,GO:0005161,GO:0019966,GO:0019221,GO:0032729,GO:0050727,GO:0070498,GO:0070555,GO:2000391,GO:2000556,GO:2000661,GO:0009897,GO:0009986,GO:0016020	signal transduction,NAD+ nucleosidase activity,interleukin-1 receptor activity,interleukin-1, type I, activating receptor activity,protease binding,platelet-derived growth factor receptor binding,interleukin-1 binding,cytokine-mediated signaling pathway,positive regulation of interferon-gamma production,regulation of inflammatory response,interleukin-1-mediated signaling pathway,response to inter…	1.19712	8.02844	9.25554	0.0117122	0.187365	2
ENSCAFG00845010324	FGD2	481771	FYVE, RhoGEF and PH domain containing 2 [Source:HGNC Symbol;Acc:HGNC:3664]	protein_coding	GO:0046872,GO:0005085,GO:1901981,GO:0043507,GO:0001726,GO:0005634,GO:0005737,GO:0005769	metal ion binding,guanyl-nucleotide exchange factor activity,phosphatidylinositol phosphate binding,positive regulation of JUN kinase activity,ruffle,nucleus,cytoplasm,early endosome	1.19757	4.34169	9.17508	0.0119872	0.188902	2
ENSCAFG00845009433		NA		lncRNA			1.74052	1.42093	9.16833	0.0120107	0.188902	2
ENSCAFG00845007233	KRT27	491007	keratin 27 [Source:NCBI gene (formerly Entrezgene);Acc:491007]	protein_coding	GO:0005198,GO:0031069	structural molecule activity,hair follicle morphogenesis	2.29887	-1.88552	9.16212	0.0120323	0.188902	2
ENSCAFG00845004927		102152131		protein_coding			3.83778	1.0483	9.14696	0.0120852	0.188902	2
ENSCAFG00845024069		100688487		protein_coding	GO:0008284,GO:0001819,GO:0010884	positive regulation of cell population proliferation,positive regulation of cytokine production,positive regulation of lipid storage	3.36026	0.559461	9.12973	0.0121457	0.188902	2
ENSCAFG00845007434	ZFR2	485051	zinc finger RNA binding protein 2 [Source:HGNC Symbol;Acc:HGNC:29189]	protein_coding	GO:0008270,GO:0003676	zinc ion binding,nucleic acid binding	1.25617	3.12182	9.11085	0.0122124	0.188902	2
ENSCAFG00845024733	DDX3X	480886	DEAD-box helicase 3 X-linked [Source:HGNC Symbol;Acc:HGNC:2745]	protein_coding	GO:0005524,GO:0003676,GO:0003724,GO:0005737,GO:0003723,GO:0005634,GO:0003677,GO:0005886,GO:0045087,GO:0006413,GO:0003724,GO:0016055,GO:0045948,GO:0003678,GO:0005852,GO:0010494,GO:0022627,GO:0007059,GO:0003729,GO:0042256,GO:0005813,GO:0017148,GO:0030308,GO:0045944,GO:0010628,GO:0009615,GO:0043065,GO:0097193,GO:0035556,GO:0043066,GO:0045727,GO:0043280,GO:0031954,GO:0043154,GO:1900087,GO:0098586,GO:…	ATP binding,nucleic acid binding,RNA helicase activity,cytoplasm,RNA binding,nucleus,DNA binding,plasma membrane,innate immune response,translational initiation,RNA helicase activity,Wnt signaling pathway,positive regulation of translational initiation,DNA helicase activity,eukaryotic translation initiation factor 3 complex,cytoplasmic stress granule,cytosolic small ribosomal subunit,chromosome s…	0.717789	8.57938	9.10454	0.0122348	0.188902	2
ENSCAFG00845017849	CT83	481027		protein_coding			3.60042	-1.83988	9.0963	0.0122641	0.188902	2
ENSCAFG00845027907		611542		protein_coding			2.66825	3.54211	9.07304	0.0123473	0.188902	2
ENSCAFG00845004671	PSME2	480258	proteasome activator subunit 2 [Source:HGNC Symbol;Acc:HGNC:9569]	protein_coding	GO:0008537,GO:0042802	proteasome activator complex,identical protein binding	1.18907	4.21039	9.07163	0.0123524	0.188902	2
ENSCAFG00845016220	NCKAP1L	486492	NCK associated protein 1 like [Source:HGNC Symbol;Acc:HGNC:4862]	protein_coding	GO:0005829,GO:0005096,GO:0006935,GO:0032715,GO:0044877,GO:0045648,GO:1904841,GO:0030838,GO:0043066,GO:0001782,GO:0030890,GO:0050853,GO:0030866,GO:0042102,GO:0030593,GO:0090023,GO:0065003,GO:0033630,GO:0048821,GO:0035509,GO:0042327,GO:0009410,GO:0002687,GO:0032700,GO:0060100,GO:0043029,GO:0030011,GO:0043372,GO:0031209,GO:0031209,GO:0030295,GO:0002262,GO:0034101,GO:0043318,GO:0043378,GO:0045579,GO:…	cytosol,GTPase activator activity,chemotaxis,negative regulation of interleukin-6 production,protein-containing complex binding,positive regulation of erythrocyte differentiation,TORC2 complex binding,positive regulation of actin filament polymerization,negative regulation of apoptotic process,B cell homeostasis,positive regulation of B cell proliferation,B cell receptor signaling pathway,cortica…	1.76904	6.33354	9.06903	0.0123617	0.188902	2
ENSCAFG00845003454	LPGAT1	609933	lysophosphatidylglycerol acyltransferase 1 [Source:HGNC Symbol;Acc:HGNC:28985]	protein_coding	GO:0016746,GO:0005737,GO:0005789,GO:0071617,GO:0045723	acyltransferase activity,cytoplasm,endoplasmic reticulum membrane,lysophospholipid acyltransferase activity,positive regulation of fatty acid biosynthetic process	1.43681	7.44242	9.04386	0.0124526	0.188902	2
ENSCAFG00845028316		486787		protein_coding	GO:0006355	regulation of transcription, DNA-templated	1.08621	0.440952	8.99393	0.0126354	0.188902	2
ENSCAFG00845007224	REXO5	479820	RNA exonuclease 5 [Source:HGNC Symbol;Acc:HGNC:24661]	protein_coding	GO:0003676,GO:0005730	nucleic acid binding,nucleolus	1.1493	3.77879	8.96292	0.0127506	0.188979	2
ENSCAFG00845017843	PID1	100685906	phosphotyrosine interaction domain containing 1 [Source:HGNC Symbol;Acc:HGNC:26084]	protein_coding	GO:0042127,GO:0051881,GO:0046627,GO:0010628,GO:0045944,GO:0005737,GO:0071356,GO:0001933,GO:1903077,GO:2000379,GO:0046325,GO:0046325,GO:0046627,GO:0071345,GO:0044320,GO:0051881,GO:0070346,GO:0070584,GO:0071354,GO:0071398,GO:2000377,GO:2001170,GO:2001171	regulation of cell population proliferation,regulation of mitochondrial membrane potential,negative regulation of insulin receptor signaling pathway,positive regulation of gene expression,positive regulation of transcription by RNA polymerase II,cytoplasm,cellular response to tumor necrosis factor,negative regulation of protein phosphorylation,negative regulation of protein localization to plasma…	1.12147	6.74385	8.94385	0.012822	0.189131	2
ENSCAFG00845019772	GARS1	100856659	glycyl-tRNA synthetase 1 [Source:HGNC Symbol;Acc:HGNC:4162]	protein_coding	GO:0005524,GO:0005737,GO:0004812,GO:0006418,GO:0000166,GO:0004820,GO:0006426,GO:0030424,GO:0004081,GO:0070062,GO:0005829,GO:0042802,GO:0046983,GO:0030141,GO:0006426,GO:0004820,GO:0004820,GO:0006418,GO:0015966	ATP binding,cytoplasm,aminoacyl-tRNA ligase activity,tRNA aminoacylation for protein translation,nucleotide binding,glycine-tRNA ligase activity,glycyl-tRNA aminoacylation,axon,bis(5'-nucleosyl)-tetraphosphatase (asymmetrical) activity,extracellular exosome,cytosol,identical protein binding,protein dimerization activity,secretory granule,glycyl-tRNA aminoacylation,glycine-tRNA ligase activity,gly…	0.984361	6.42447	8.94126	0.0128317	0.189131	2
ENSCAFG00845023626	NFKB2	486858	nuclear factor kappa B subunit 2 [Source:HGNC Symbol;Acc:HGNC:7795]	protein_coding	GO:0003677,GO:0006355,GO:0005515,GO:0007165,GO:0005737,GO:0003700,GO:0000978,GO:0001228,GO:1990837,GO:0002268,GO:0002467,GO:0030198,GO:0038061,GO:0045944,GO:0048536,GO:0005634,GO:0005829,GO:0033257	DNA binding,regulation of transcription, DNA-templated,protein binding,signal transduction,cytoplasm,DNA-binding transcription factor activity,RNA polymerase II cis-regulatory region sequence-specific DNA binding,DNA-binding transcription activator activity, RNA polymerase II-specific,sequence-specific double-stranded DNA binding,follicular dendritic cell differentiation,germinal center formation…	1.32349	5.44841	8.90023	0.0129872	0.189354	2
ENSCAFG00845002706	MEFV	119872211	MEFV innate immuity regulator, pyrin [Source:HGNC Symbol;Acc:HGNC:6998]	protein_coding	GO:0008270,GO:0005515,GO:0003779,GO:0042802,GO:0006954,GO:0010508,GO:0032651,GO:0032691,GO:0032695,GO:0034341,GO:0050728,GO:0071641,GO:1900016,GO:1900226,GO:1904270,GO:2001056,GO:0005634,GO:0005654,GO:0005737,GO:0005829,GO:0005875	zinc ion binding,protein binding,actin binding,identical protein binding,inflammatory response,positive regulation of autophagy,regulation of interleukin-1 beta production,negative regulation of interleukin-1 beta production,negative regulation of interleukin-12 production,response to interferon-gamma,negative regulation of inflammatory response,negative regulation of macrophage inflammatory prot…	2.59767	3.25863	8.88784	0.0130346	0.189706	2
ENSCAFG00845024267	DONSON	100856622	DNA replication fork stabilization factor DONSON [Source:HGNC Symbol;Acc:HGNC:2993]	protein_coding	GO:0000077,GO:0006260,GO:0007095,GO:0048478,GO:0005634,GO:0005657,GO:0030894	DNA damage checkpoint signaling,DNA replication,mitotic G2 DNA damage checkpoint signaling,replication fork protection,nucleus,replication fork,replisome	0.90225	4.26949	8.88555	0.0130434	0.189706	2
ENSCAFG00845008825	IL6	403985	interleukin 6 [Source:NCBI gene (formerly Entrezgene);Acc:403985]	protein_coding	GO:0005576,GO:0005125,GO:0006955,GO:0005615,GO:0005138,GO:0072540,GO:0043065,GO:0043066,GO:0045727,GO:0042593,GO:0008284,GO:0010573,GO:0005615,GO:0051091,GO:0010628,GO:0045669,GO:0032760,GO:0045944,GO:0045893,GO:0032755,GO:0032731,GO:0033138,GO:0050731,GO:0071222,GO:0051384,GO:0032757,GO:0005125,GO:0008083,GO:0070102,GO:0050871,GO:0010718,GO:0032722,GO:0031175,GO:0032966,GO:0043410,GO:1904894,GO:…	extracellular region,cytokine activity,immune response,extracellular space,interleukin-6 receptor binding,T-helper 17 cell lineage commitment,positive regulation of apoptotic process,negative regulation of apoptotic process,positive regulation of translation,glucose homeostasis,positive regulation of cell population proliferation,vascular endothelial growth factor production,extracellular space,p…	6.53163	5.43593	8.87991	0.013065	0.189884	2
ENSCAFG00845021171	HIVEP1	488221	HIVEP zinc finger 1 [Source:HGNC Symbol;Acc:HGNC:4920]	protein_coding	GO:0005634,GO:0005829,GO:0005654,GO:1990837,GO:0016604,GO:0005739,GO:0000978,GO:0001227,GO:0000122,GO:0030509,GO:0045944	nucleus,cytosol,nucleoplasm,sequence-specific double-stranded DNA binding,nuclear body,mitochondrion,RNA polymerase II cis-regulatory region sequence-specific DNA binding,DNA-binding transcription repressor activity, RNA polymerase II-specific,negative regulation of transcription by RNA polymerase II,BMP signaling pathway,positive regulation of transcription by RNA polymerase II	0.790958	8.0192	8.8515	0.0131748	0.190038	2
ENSCAFG00845030234	CD48	488642		protein_coding	GO:0038023,GO:0003823,GO:0002819	signaling receptor activity,antigen binding,regulation of adaptive immune response	2.10562	5.90327	8.85043	0.013179	0.190038	2
ENSCAFG00845007629	PICALM	476780	phosphatidylinositol binding clathrin assembly protein [Source:HGNC Symbol;Acc:HGNC:15514]	protein_coding	GO:0005543,GO:0006897,GO:0048268,GO:0005545,GO:0030276,GO:0030136,GO:0005886,GO:0006897,GO:0005905,GO:0043231,GO:0007611,GO:0045893,GO:0005634,GO:0000149,GO:0048471,GO:0006898,GO:0005769,GO:0032880,GO:0043547,GO:0007409,GO:0030276,GO:0031267,GO:0032050,GO:0048156,GO:0050750,GO:0006900,GO:0010629,GO:0016188,GO:0016197,GO:0030097,GO:0030100,GO:0031623,GO:0035459,GO:0048261,GO:0048268,GO:0048813,GO:…	phospholipid binding,endocytosis,clathrin coat assembly,1-phosphatidylinositol binding,clathrin binding,clathrin-coated vesicle,plasma membrane,endocytosis,clathrin-coated pit,intracellular membrane-bounded organelle,learning or memory,positive regulation of transcription, DNA-templated,nucleus,SNARE binding,perinuclear region of cytoplasm,receptor-mediated endocytosis,early endosome,regulation o…	1.01363	9.81477	8.82178	0.0132908	0.190656	2
ENSCAFG00845016792	HK2	100856448	hexokinase 2 [Source:HGNC Symbol;Acc:HGNC:4923]	protein_coding	GO:0006096,GO:0005524,GO:0005975,GO:0016773,GO:0004396,GO:0005536,GO:0001678,GO:0004396,GO:0005829,GO:0043231,GO:0005739,GO:1990830,GO:0045766,GO:0005813,GO:0072655,GO:0072656,GO:0008637,GO:0008637,GO:0006006,GO:0004340,GO:0051156,GO:0046324,GO:0005741,GO:0046835,GO:0035795,GO:1904925,GO:2000378	glycolytic process,ATP binding,carbohydrate metabolic process,phosphotransferase activity, alcohol group as acceptor,hexokinase activity,glucose binding,cellular glucose homeostasis,hexokinase activity,cytosol,intracellular membrane-bounded organelle,mitochondrion,cellular response to leukemia inhibitory factor,positive regulation of angiogenesis,centrosome,establishment of protein localization t…	2.8579	5.46591	8.80511	0.0133564	0.190834	2
ENSCAFG00845026010	RGS4	488666	regulator of G protein signaling 4 [Source:HGNC Symbol;Acc:HGNC:10000]	protein_coding	GO:0007186,GO:0005096,GO:0005634,GO:0005737	G protein-coupled receptor signaling pathway,GTPase activator activity,nucleus,cytoplasm	4.5245	6.5284	8.78475	0.0134371	0.190881	2
ENSCAFG00845005353	PTPN2	490563		protein_coding	GO:0016791,GO:0004725,GO:0006470,GO:0016311,GO:0004725,GO:0030218,GO:0050728,GO:0042593,GO:0030217,GO:0000122,GO:0010804,GO:0035335,GO:0030183,GO:0005634,GO:0050860,GO:0006470,GO:0060336,GO:0060339,GO:0008286,GO:0097677,GO:0010888,GO:0042532,GO:0045650,GO:0045722,GO:0046627,GO:0050922,GO:0061099,GO:0070104,GO:0070373,GO:1902206,GO:1902215,GO:1902227,GO:1902233,GO:1902237,GO:1903899,GO:2000587	phosphatase activity,protein tyrosine phosphatase activity,protein dephosphorylation,dephosphorylation,protein tyrosine phosphatase activity,erythrocyte differentiation,negative regulation of inflammatory response,glucose homeostasis,T cell differentiation,negative regulation of transcription by RNA polymerase II,negative regulation of tumor necrosis factor-mediated signaling pathway,peptidyl-tyr…	0.980802	6.86506	8.7828	0.0134449	0.190881	2
ENSCAFG00845006313	CXCL6	106557449	C-X-C motif chemokine ligand 6 [Source:HGNC Symbol;Acc:HGNC:10643]	protein_coding	GO:0005576,GO:0006935,GO:0006955,GO:0006952,GO:0008009,GO:0071222,GO:0030593,GO:0008009,GO:0061844,GO:0042119	extracellular region,chemotaxis,immune response,defense response,chemokine activity,cellular response to lipopolysaccharide,neutrophil chemotaxis,chemokine activity,antimicrobial humoral immune response mediated by antimicrobial peptide,neutrophil activation	6.06228	4.59516	8.76299	0.013524	0.190881	2
ENSCAFG00845018566		NA		lncRNA			3.22991	-0.797175	8.75783	0.0135447	0.190881	2
ENSCAFG00845021421	TAPBP	481740	TAP binding protein [Source:NCBI gene (formerly Entrezgene);Acc:481740]	protein_coding	GO:0016020,GO:0019885,GO:0005789,GO:0000139,GO:0065003,GO:0042824,GO:0046978,GO:0046979,GO:0062061,GO:0002398,GO:0010468,GO:0061635	membrane,antigen processing and presentation of endogenous peptide antigen via MHC class I,endoplasmic reticulum membrane,Golgi membrane,protein-containing complex assembly,MHC class I peptide loading complex,TAP1 binding,TAP2 binding,TAP complex binding,MHC class Ib protein complex assembly,regulation of gene expression,regulation of protein complex stability	0.825983	7.03892	8.75275	0.0135651	0.190881	2
ENSCAFG00845010898	CNP	607694	2',3'-cyclic nucleotide 3' phosphodiesterase [Source:HGNC Symbol;Acc:HGNC:2158]	protein_coding	GO:0016020,GO:0004113,GO:0009214,GO:0005737,GO:0005615,GO:0005886,GO:0007409,GO:0009636,GO:0043209,GO:0016020,GO:0008344,GO:0048709,GO:0004113	membrane,2',3'-cyclic-nucleotide 3'-phosphodiesterase activity,cyclic nucleotide catabolic process,cytoplasm,extracellular space,plasma membrane,axonogenesis,response to toxic substance,myelin sheath,membrane,adult locomotory behavior,oligodendrocyte differentiation,2',3'-cyclic-nucleotide 3'-phosphodiesterase activity	1.13424	4.32784	8.73016	0.0136563	0.191462	2
ENSCAFG00845027986	ICAM1	403975	intercellular adhesion molecule 1 [Source:NCBI gene (formerly Entrezgene);Acc:403975]	protein_coding	GO:0016020,GO:0098609,GO:0045121,GO:0061028,GO:0070062,GO:0005615,GO:1990830,GO:0009897,GO:1902042,GO:2000352,GO:0007155,GO:0001772,GO:0007159,GO:0022614,GO:0050900,GO:0070374,GO:0005178,GO:1904646,GO:0033627,GO:0044406,GO:1900027,GO:0071333,GO:0002693,GO:0002457,GO:0072683,GO:0002291,GO:0046813	membrane,cell-cell adhesion,membrane raft,establishment of endothelial barrier,extracellular exosome,extracellular space,cellular response to leukemia inhibitory factor,external side of plasma membrane,negative regulation of extrinsic apoptotic signaling pathway via death domain receptors,negative regulation of endothelial cell apoptotic process,cell adhesion,immunological synapse,leukocyte cell-…	1.45958	6.97002	8.69194	0.0138123	0.192184	2
ENSCAFG00845002659	DOCK2	489128	dedicator of cytokinesis 2 [Source:HGNC Symbol;Acc:HGNC:2988]	protein_coding	GO:0005515,GO:0005085,GO:0007264,GO:0030036,GO:0005096,GO:0042608,GO:0001766,GO:0001768,GO:0001771,GO:0002277,GO:0006935,GO:0007010,GO:0042098,GO:0042110,GO:0044351,GO:0045059,GO:0045060,GO:0046631,GO:0046633,GO:0050766	protein binding,guanyl-nucleotide exchange factor activity,small GTPase mediated signal transduction,actin cytoskeleton organization,GTPase activator activity,T cell receptor binding,membrane raft polarization,establishment of T cell polarity,immunological synapse formation,myeloid dendritic cell activation involved in immune response,chemotaxis,cytoskeleton organization,T cell proliferation,T ce…	1.07295	6.78383	8.67319	0.0138896	0.192598	2
ENSCAFG00845028762	PRKCD	494005	protein kinase C delta [Source:NCBI gene (formerly Entrezgene);Acc:494005]	protein_coding	GO:0005524,GO:0006468,GO:0035556,GO:0004674,GO:0004672,GO:0004697,GO:0008047,GO:0019899,GO:0019900,GO:0019901,GO:0043560,GO:0106310,GO:0006915,GO:0016064,GO:0016572,GO:0018105,GO:0018107,GO:0023021,GO:0030837,GO:0032079,GO:0032147,GO:0032930,GO:0032956,GO:0034351,GO:0034644,GO:0035307,GO:0042100,GO:0042119,GO:0042307,GO:0042742,GO:0043407,GO:0046627,GO:0050732,GO:0051490,GO:0060326,GO:0070301,GO:…	ATP binding,protein phosphorylation,intracellular signal transduction,protein serine/threonine kinase activity,protein kinase activity,protein kinase C activity,enzyme activator activity,enzyme binding,kinase binding,protein kinase binding,insulin receptor substrate binding,protein serine kinase activity,apoptotic process,immunoglobulin mediated immune response,histone phosphorylation,peptidyl-se…	0.660006	5.70314	8.63241	0.0140596	0.19374	2
ENSCAFG00845018632	INHBA	483245	inhibin subunit beta A [Source:HGNC Symbol;Acc:HGNC:6066]	protein_coding	GO:0005576,GO:0005179,GO:0008083,GO:0005102,GO:0005125,GO:0017046,GO:0042802,GO:0070699,GO:0001541,GO:0001707,GO:0001942,GO:0002244,GO:0006357,GO:0008285,GO:0008584,GO:0009410,GO:0010628,GO:0010862,GO:0021773,GO:0030308,GO:0032270,GO:0032924,GO:0035987,GO:0042476,GO:0042541,GO:0042701,GO:0045648,GO:0045893,GO:0045944,GO:0046880,GO:0048333,GO:0051799,GO:0060021,GO:0060279,GO:0061029,GO:0097154,GO:…	extracellular region,hormone activity,growth factor activity,signaling receptor binding,cytokine activity,peptide hormone binding,identical protein binding,type II activin receptor binding,ovarian follicle development,mesoderm formation,hair follicle development,hematopoietic progenitor cell differentiation,regulation of transcription by RNA polymerase II,negative regulation of cell population pr…	3.32095	3.58672	8.61743	0.0141227	0.193822	2
ENSCAFG00845021143		609266		protein_coding	GO:0005515,GO:0016020,GO:0004896	protein binding,membrane,cytokine receptor activity	2.51791	5.65696	8.61542	0.0141311	0.193822	2
ENSCAFG00845002305	IL27	607880	interleukin 27 [Source:HGNC Symbol;Acc:HGNC:19157]	protein_coding	GO:0045523,GO:0042129,GO:0005102,GO:0005615,GO:0002230,GO:0042129,GO:0045523,GO:0032729,GO:0045625	interleukin-27 receptor binding,regulation of T cell proliferation,signaling receptor binding,extracellular space,positive regulation of defense response to virus by host,regulation of T cell proliferation,interleukin-27 receptor binding,positive regulation of interferon-gamma production,regulation of T-helper 1 cell differentiation	1.94832	-0.44719	8.59847	0.0142029	0.194411	2
ENSCAFG00845026071	PLK3	475380	polo like kinase 3 [Source:HGNC Symbol;Acc:HGNC:2154]	protein_coding	GO:0005524,GO:0005515,GO:0006468,GO:0004674,GO:0004672,GO:0005737,GO:0005634,GO:0004674,GO:0006974,GO:0000122,GO:0005730,GO:0005813,GO:0005795,GO:0031122,GO:0000082,GO:0000302,GO:0043066,GO:0051302,GO:0002039,GO:0032465,GO:0090166,GO:2000777,GO:0090316,GO:0009314,GO:0006970,GO:1904716	ATP binding,protein binding,protein phosphorylation,protein serine/threonine kinase activity,protein kinase activity,cytoplasm,nucleus,protein serine/threonine kinase activity,cellular response to DNA damage stimulus,negative regulation of transcription by RNA polymerase II,nucleolus,centrosome,Golgi stack,cytoplasmic microtubule organization,G1/S transition of mitotic cell cycle,response to reac…	2.63653	4.37912	8.57891	0.0142864	0.19492	2
ENSCAFG00845009425		NA		lncRNA			1.47783	1.83705	8.5606	0.014365	0.195178	2
ENSCAFG00845027619	RASA3	476998	RAS p21 protein activator 3 [Source:HGNC Symbol;Acc:HGNC:20331]	protein_coding	GO:0007165,GO:0005096,GO:0035556,GO:0043087,GO:0046580,GO:0015278,GO:0031235	signal transduction,GTPase activator activity,intracellular signal transduction,regulation of GTPase activity,negative regulation of Ras protein signal transduction,calcium-release channel activity,intrinsic component of the cytoplasmic side of the plasma membrane	1.61868	7.33424	8.5504	0.014409	0.195178	2
ENSCAFG00845020489	MS4A7	612564	membrane spanning 4-domains A7 [Source:HGNC Symbol;Acc:HGNC:13378]	protein_coding	GO:0016021,GO:0005802	integral component of membrane,trans-Golgi network	2.90871	3.58606	8.53092	0.0144936	0.195871	2
ENSCAFG00845011971	IL1RN	403660	interleukin 1 receptor antagonist [Source:NCBI gene (formerly Entrezgene);Acc:403660]	protein_coding	GO:0005125,GO:0006955,GO:0006954,GO:0005615,GO:0005149,GO:0005152,GO:2000660,GO:0005150,GO:0005151,GO:0045352,GO:0045353,GO:0006629,GO:0030073,GO:0034115,GO:0051384,GO:0005576,GO:0031982	cytokine activity,immune response,inflammatory response,extracellular space,interleukin-1 receptor binding,interleukin-1 receptor antagonist activity,negative regulation of interleukin-1-mediated signaling pathway,interleukin-1, type I receptor binding,interleukin-1, type II receptor binding,interleukin-1 type I receptor antagonist activity,interleukin-1 type II receptor antagonist activity,lipid…	3.79004	7.00397	8.48114	0.0147123	0.196376	2
ENSCAFG00845029755	LCN2	491320	lipocalin 2 [Source:HGNC Symbol;Acc:HGNC:6526]	protein_coding	GO:0036094,GO:0005506,GO:0042802,GO:1903981,GO:0042742,GO:0097577,GO:0005615	small molecule binding,iron ion binding,identical protein binding,enterobactin binding,defense response to bacterium,sequestering of iron ion,extracellular space	3.55757	1.44877	8.46371	0.0147898	0.196703	2
ENSCAFG00845020350	PELI1	481388	pellino E3 ubiquitin protein ligase 1 [Source:HGNC Symbol;Acc:HGNC:8827]	protein_coding	GO:0061630,GO:0000209,GO:0008592,GO:0004842,GO:0001819,GO:0030890,GO:0031398,GO:0032088,GO:0032496,GO:0034141,GO:0034145,GO:0042130,GO:0043123,GO:0043161,GO:0043331,GO:0050868,GO:0050871,GO:0060546,GO:0070534,GO:0070936,GO:0005634	ubiquitin protein ligase activity,protein polyubiquitination,regulation of Toll signaling pathway,ubiquitin-protein transferase activity,positive regulation of cytokine production,positive regulation of B cell proliferation,positive regulation of protein ubiquitination,negative regulation of NF-kappaB transcription factor activity,response to lipopolysaccharide,positive regulation of toll-like re…	0.920329	8.51353	8.4116	0.0150246	0.198408	2
ENSCAFG00845009241	BCL2L11	612867		protein_coding			0.859206	6.52195	8.4045	0.0150569	0.198516	2
ENSCAFG00845026648	IL10RB	478404		protein_coding	GO:0016021,GO:0005515,GO:0007596	integral component of membrane,protein binding,blood coagulation	1.22479	5.75226	8.37465	0.0151937	0.198907	2
ENSCAFG00845003848	ERO1A	490691	endoplasmic reticulum oxidoreductase 1 alpha [Source:HGNC Symbol;Acc:HGNC:13280]	protein_coding	GO:0005783,GO:0015035,GO:0071949,GO:0016972,GO:0034975,GO:0016491,GO:0005783,GO:0051209,GO:0051085,GO:0070059,GO:0006979,GO:0034976,GO:0030198,GO:0006457,GO:0018401,GO:0022417,GO:0030968,GO:0045454,GO:0050873,GO:0015035	endoplasmic reticulum,protein-disulfide reductase activity,FAD binding,thiol oxidase activity,protein folding in endoplasmic reticulum,oxidoreductase activity,endoplasmic reticulum,release of sequestered calcium ion into cytosol,chaperone cofactor-dependent protein refolding,intrinsic apoptotic signaling pathway in response to endoplasmic reticulum stress,response to oxidative stress,response to …	1.33133	5.91275	8.36247	0.01525	0.198907	2
ENSCAFG00845006245	EBI3	485043	Epstein-Barr virus induced 3 [Source:HGNC Symbol;Acc:HGNC:3129]	protein_coding	GO:0005515,GO:0016020,GO:0004896,GO:0004896	protein binding,membrane,cytokine receptor activity,cytokine receptor activity	2.00042	2.54197	8.36111	0.0152563	0.198907	2
ENSCAFG00845026984	SLC38A4	486595	solute carrier family 38 member 4 [Source:HGNC Symbol;Acc:HGNC:14679]	protein_coding			2.12907	4.7054	8.31175	0.015487	0.199564	2
ENSCAFG00845007353	PVR	476439	PVR cell adhesion molecule [Source:HGNC Symbol;Acc:HGNC:9705]	protein_coding			2.10182	5.10221	8.29466	0.0155678	0.199899	2
ENSCAFG00845001163		NA		lncRNA			1.74349	-0.212234	8.28614	0.0156083	0.199899	2
ENSCAFG00845009438	GIMAP8	482794		protein_coding	GO:0005525	GTP binding	1.38388	4.01032	8.23176	0.0158698	0.201672	2
ENSCAFG00845003164	C7H18orf25	612962	chromosome 18 open reading frame 25 [Source:HGNC Symbol;Acc:HGNC:28172]	protein_coding			0.719498	6.72694	8.21507	0.0159511	0.202325	2
ENSCAFG00845013563	SLC39A12	477989	solute carrier family 39 member 12 [Source:HGNC Symbol;Acc:HGNC:20860]	protein_coding	GO:0016020,GO:0055085,GO:0046873,GO:0030001,GO:0005385,GO:0007165,GO:0010975,GO:0031113,GO:0071578,GO:0005886,GO:0048471	membrane,transmembrane transport,metal ion transmembrane transporter activity,metal ion transport,zinc ion transmembrane transporter activity,signal transduction,regulation of neuron projection development,regulation of microtubule polymerization,zinc ion import across plasma membrane,plasma membrane,perinuclear region of cytoplasm	2.38019	2.98968	8.21268	0.0159628	0.202341	2
ENSCAFG00845018589	CSTB	119867084	cystatin B [Source:HGNC Symbol;Acc:HGNC:2482]	protein_coding	GO:0004869,GO:0004866,GO:0005737,GO:0005615,GO:0005829,GO:0005634,GO:0005730,GO:0008344,GO:0002020,GO:0004866,GO:0045861,GO:0004869,GO:0010466	cysteine-type endopeptidase inhibitor activity,endopeptidase inhibitor activity,cytoplasm,extracellular space,cytosol,nucleus,nucleolus,adult locomotory behavior,protease binding,endopeptidase inhibitor activity,negative regulation of proteolysis,cysteine-type endopeptidase inhibitor activity,negative regulation of peptidase activity	1.27889	4.7055	8.21071	0.0159724	0.202341	2
ENSCAFG00845021891	TNIP3	100855775	TNFAIP3 interacting protein 3 [Source:HGNC Symbol;Acc:HGNC:19315]	protein_coding	GO:0043124,GO:0071222,GO:0031593,GO:0071222,GO:0034142,GO:0043124,GO:0002756	negative regulation of I-kappaB kinase/NF-kappaB signaling,cellular response to lipopolysaccharide,polyubiquitin modification-dependent protein binding,cellular response to lipopolysaccharide,toll-like receptor 4 signaling pathway,negative regulation of I-kappaB kinase/NF-kappaB signaling,MyD88-independent toll-like receptor signaling pathway	3.55951	6.65136	8.18225	0.0161125	0.203478	2
ENSCAFG00845017527		NA		lncRNA			2.41127	5.49867	8.16864	0.01618	0.203949	2
ENSCAFG00845012976		NA		lncRNA			1.44955	3.63581	8.13839	0.0163312	0.204707	2
ENSCAFG00845011656	PAPPA	481692	pappalysin 1 [Source:HGNC Symbol;Acc:HGNC:8602]	protein_coding	GO:0006508,GO:0008237,GO:0004222,GO:0005576,GO:0008237,GO:0004175	proteolysis,metallopeptidase activity,metalloendopeptidase activity,extracellular region,metallopeptidase activity,endopeptidase activity	2.19526	7.06836	8.13113	0.0163678	0.205038	2
ENSCAFG00845022530	ZNF281	490250	zinc finger protein 281 [Source:HGNC Symbol;Acc:HGNC:13075]	protein_coding	GO:0005634,GO:0003700,GO:0003700,GO:0043565,GO:0045893,GO:0001227,GO:0045892,GO:0000976,GO:0000978,GO:0010629,GO:0048863,GO:0005654,GO:1990837,GO:0001227,GO:0000122,GO:0010172	nucleus,DNA-binding transcription factor activity,DNA-binding transcription factor activity,sequence-specific DNA binding,positive regulation of transcription, DNA-templated,DNA-binding transcription repressor activity, RNA polymerase II-specific,negative regulation of transcription, DNA-templated,transcription cis-regulatory region binding,RNA polymerase II cis-regulatory region sequence-specifi…	1.31957	6.21305	8.11036	0.0164728	0.20559	2
ENSCAFG00845010148	POLH	474915	DNA polymerase eta [Source:HGNC Symbol;Acc:HGNC:9181]	protein_coding	GO:0006281,GO:0003684,GO:0003887,GO:0000731,GO:0006290,GO:0006301,GO:0010225,GO:0071494,GO:0005654,GO:0005829	DNA repair,damaged DNA binding,DNA-directed DNA polymerase activity,DNA synthesis involved in DNA repair,pyrimidine dimer repair,postreplication repair,response to UV-C,cellular response to UV-C,nucleoplasm,cytosol	0.624566	4.28283	8.09381	0.0165572	0.205782	2
ENSCAFG00845028983	KCNJ15	487759	potassium inwardly rectifying channel subfamily J member 15 [Source:HGNC Symbol;Acc:HGNC:6261]	protein_coding	GO:0016021,GO:0016020,GO:0006813,GO:0005242	integral component of membrane,membrane,potassium ion transport,inward rectifier potassium channel activity	1.80884	4.59688	8.07596	0.0166487	0.206164	2
ENSCAFG00845030692	ALAS1	476600	5'-aminolevulinate synthase 1 [Source:HGNC Symbol;Acc:HGNC:396]	protein_coding	GO:0003824,GO:0030170,GO:0033014,GO:0009058,GO:0016740,GO:0005759,GO:0003870,GO:0006778,GO:0005829,GO:0005654,GO:0042802,GO:0005739	catalytic activity,pyridoxal phosphate binding,tetrapyrrole biosynthetic process,biosynthetic process,transferase activity,mitochondrial matrix,5-aminolevulinate synthase activity,porphyrin-containing compound metabolic process,cytosol,nucleoplasm,identical protein binding,mitochondrion	1.3437	7.5645	8.05902	0.0167362	0.206457	2
ENSCAFG00845018347	NLRP3	490576	NLR family pyrin domain containing 3 [Source:HGNC Symbol;Acc:HGNC:16400]	protein_coding	GO:0005515	protein binding	2.48591	6.45854	8.01624	0.0169594	0.207593	2
ENSCAFG00845002422		609365		protein_coding	GO:0009986	cell surface	1.29683	9.27851	8.00723	0.0170069	0.207644	2
ENSCAFG00845022513	UPB1	486398	beta-ureidopropionase 1 [Source:HGNC Symbol;Acc:HGNC:16297]	protein_coding	GO:0006807,GO:0003837,GO:0042803,GO:0006248,GO:0006249,GO:0033396,GO:0046050,GO:0046079,GO:0046135,GO:0051260,GO:0051289,GO:0005829	nitrogen compound metabolic process,beta-ureidopropionase activity,protein homodimerization activity,CMP catabolic process,dCMP catabolic process,beta-alanine biosynthetic process via 3-ureidopropionate,UMP catabolic process,dUMP catabolic process,pyrimidine nucleoside catabolic process,protein homooligomerization,protein homotetramerization,cytosol	1.23081	2.59261	8.00215	0.0170337	0.207721	2
ENSCAFG00845028505	DUSP5	486884	dual specificity phosphatase 5 [Source:HGNC Symbol;Acc:HGNC:3071]	protein_coding	GO:0016791,GO:0004725,GO:0006470,GO:0008138,GO:0016311,GO:0017017,GO:0035335,GO:0035970	phosphatase activity,protein tyrosine phosphatase activity,protein dephosphorylation,protein tyrosine/serine/threonine phosphatase activity,dephosphorylation,MAP kinase tyrosine/serine/threonine phosphatase activity,peptidyl-tyrosine dephosphorylation,peptidyl-threonine dephosphorylation	1.65239	4.58991	7.99792	0.0170561	0.207785	2
ENSCAFG00845010699	LST1	607208		protein_coding	GO:0016020,GO:0006955,GO:0000902	membrane,immune response,cell morphogenesis	2.06181	2.31809	7.98709	0.0171136	0.20798	2
ENSCAFG00845019683		608536		protein_coding	GO:0010468,GO:0030234,GO:0019899,GO:0006306,GO:0005737,GO:0048863,GO:0001701,GO:0005634,GO:0000792,GO:0007283,GO:0001890,GO:0000794,GO:0006306,GO:0060718,GO:0007141,GO:0043046,GO:0035098,GO:0071514,GO:0010529,GO:0032259,GO:0008047,GO:0032776,GO:1905642,GO:1905643	regulation of gene expression,enzyme regulator activity,enzyme binding,DNA methylation,cytoplasm,stem cell differentiation,in utero embryonic development,nucleus,heterochromatin,spermatogenesis,placenta development,condensed nuclear chromosome,DNA methylation,chorionic trophoblast cell differentiation,male meiosis I,DNA methylation involved in gamete generation,ESC/E(Z) complex,genetic imprinting…	2.01505	2.42535	7.96395	0.0172372	0.208267	2
ENSCAFG00845012038	RBM25	610314	RNA binding motif protein 25 [Source:HGNC Symbol;Acc:HGNC:23244]	protein_coding	GO:0003676,GO:0006397,GO:0016607,GO:0003729,GO:0000381,GO:0042981	nucleic acid binding,mRNA processing,nuclear speck,mRNA binding,regulation of alternative mRNA splicing, via spliceosome,regulation of apoptotic process	0.58964	7.36241	7.95063	0.0173089	0.208267	2
ENSCAFG00845025087	SLCO5A1	477907	solute carrier organic anion transporter family member 5A1 [Source:HGNC Symbol;Acc:HGNC:19046]	protein_coding	GO:0005515,GO:0016020,GO:0022857,GO:0055085,GO:0005886,GO:0043231	protein binding,membrane,transmembrane transporter activity,transmembrane transport,plasma membrane,intracellular membrane-bounded organelle	1.75537	3.68181	7.94472	0.0173408	0.208267	2
ENSCAFG00845030596	CFP	491859	complement factor properdin [Source:HGNC Symbol;Acc:HGNC:8864]	protein_coding	GO:0006957,GO:0005615,GO:0030141	complement activation, alternative pathway,extracellular space,secretory granule	2.30032	4.44868	7.94116	0.01736	0.208267	2
ENSCAFG00845028310	CD209	485000	CD209 molecule [Source:NCBI gene (formerly Entrezgene);Acc:485000]	protein_coding			3.66595	4.3672	7.93828	0.0173756	0.208267	2
ENSCAFG00845030024	CASP8	488473	caspase 8 [Source:NCBI gene (formerly Entrezgene);Acc:488473]	protein_coding	GO:0005515,GO:0042981,GO:0006508,GO:0008234,GO:0004197,GO:0006915,GO:0008233,GO:0031625,GO:0035877,GO:0042802,GO:0097110,GO:0097153,GO:0097199,GO:0032731,GO:0034612,GO:0036462,GO:0043123,GO:0043124,GO:0045651,GO:0045862,GO:0051603,GO:0060546,GO:0071260,GO:0097190,GO:0097191,GO:0097194,GO:0097202,GO:0005654,GO:0005829,GO:0031264,GO:0031265,GO:0032991,GO:0097342	protein binding,regulation of apoptotic process,proteolysis,cysteine-type peptidase activity,cysteine-type endopeptidase activity,apoptotic process,peptidase activity,ubiquitin protein ligase binding,death effector domain binding,identical protein binding,scaffold protein binding,cysteine-type endopeptidase activity involved in apoptotic process,cysteine-type endopeptidase activity involved in ap…	1.17192	5.25364	7.93107	0.0174147	0.208267	2
ENSCAFG00845013638	ARHGAP15	476138	Rho GTPase activating protein 15 [Source:HGNC Symbol;Acc:HGNC:21030]	protein_coding	GO:0007165,GO:0005096,GO:0008360,GO:0005515,GO:0005543	signal transduction,GTPase activator activity,regulation of cell shape,protein binding,phospholipid binding	1.52745	9.40648	7.92739	0.0174347	0.208267	2
ENSCAFG00845014724	GCH1	609393	GTP cyclohydrolase 1 [Source:HGNC Symbol;Acc:HGNC:4193]	protein_coding	GO:0003934,GO:0046654,GO:0005737,GO:0005634,GO:0031410,GO:0005829,GO:0005525,GO:0008270,GO:0003924,GO:0006729,GO:0042803,GO:0042802,GO:0034612,GO:0032991,GO:0008217,GO:0042416,GO:0005654,GO:0031965,GO:0032496,GO:0034341,GO:0050884,GO:0014916,GO:0003934,GO:0051019,GO:0010460,GO:0042559,GO:0051000,GO:2000121	GTP cyclohydrolase I activity,tetrahydrofolate biosynthetic process,cytoplasm,nucleus,cytoplasmic vesicle,cytosol,GTP binding,zinc ion binding,GTPase activity,tetrahydrobiopterin biosynthetic process,protein homodimerization activity,identical protein binding,response to tumor necrosis factor,protein-containing complex,regulation of blood pressure,dopamine biosynthetic process,nucleoplasm,nuclear…	1.22105	6.00193	7.89944	0.0175875	0.208579	2
ENSCAFG00845018834	ANGPTL6	611293	angiopoietin like 6 [Source:HGNC Symbol;Acc:HGNC:23140]	protein_coding			1.10046	1.83425	7.87912	0.0176996	0.209204	2
ENSCAFG00845013172	CKAP4	481295	cytoskeleton associated protein 4 [Source:HGNC Symbol;Acc:HGNC:16991]	protein_coding	GO:0005783,GO:0005811,GO:0005791,GO:0005829,GO:0016607,GO:0036464	endoplasmic reticulum,lipid droplet,rough endoplasmic reticulum,cytosol,nuclear speck,cytoplasmic ribonucleoprotein granule	1.19871	5.07895	7.87413	0.0177273	0.209364	2
ENSCAFG00845024728	ADAM17	475662	ADAM metallopeptidase domain 17 [Source:NCBI gene (formerly Entrezgene);Acc:475662]	protein_coding	GO:0006508,GO:0008237,GO:0004222,GO:0004175,GO:0005112,GO:0005138,GO:0005178,GO:0030165,GO:1902945,GO:0001666,GO:0001934,GO:0006509,GO:0007155,GO:0007173,GO:0007220,GO:0008284,GO:0010820,GO:0016485,GO:0030307,GO:0030335,GO:0030512,GO:0032496,GO:0032722,GO:0033627,GO:0035313,GO:0035624,GO:0042987,GO:0043536,GO:0045737,GO:0045741,GO:0050830,GO:0071403,GO:1900087,GO:1903265,GO:1905564,GO:0005737,GO:…	proteolysis,metallopeptidase activity,metalloendopeptidase activity,endopeptidase activity,Notch binding,interleukin-6 receptor binding,integrin binding,PDZ domain binding,metalloendopeptidase activity involved in amyloid precursor protein catabolic process,response to hypoxia,positive regulation of protein phosphorylation,membrane protein ectodomain proteolysis,cell adhesion,epidermal growth fac…	1.11226	6.63548	7.86821	0.0177602	0.20963	2
ENSCAFG00845012845	STX11	484019	syntaxin 11 [Source:HGNC Symbol;Acc:HGNC:11429]	protein_coding	GO:0016020,GO:0005794,GO:0006886,GO:0016192,GO:0005484	membrane,Golgi apparatus,intracellular protein transport,vesicle-mediated transport,SNAP receptor activity	1.27387	3.57376	7.86538	0.017776	0.209694	2
ENSCAFG00845021592	ITGB2	403770	integrin subunit beta 2 [Source:HGNC Symbol;Acc:HGNC:6155]	protein_coding	GO:0007155,GO:0008305,GO:0038023,GO:0007160,GO:0007229	cell adhesion,integrin complex,signaling receptor activity,cell-matrix adhesion,integrin-mediated signaling pathway	1.41486	5.79656	7.84408	0.017895	0.210366	2
ENSCAFG00845013534	BCAT1	486633	branched chain amino acid transaminase 1 [Source:HGNC Symbol;Acc:HGNC:976]	protein_coding	GO:0003824,GO:0004084,GO:0009081	catalytic activity,branched-chain-amino-acid transaminase activity,branched-chain amino acid metabolic process	2.21828	6.22073	7.82012	0.0180301	0.210732	2
ENSCAFG00845031015	ZDHHC9	492126	zinc finger DHHC-type palmitoyltransferase 9 [Source:HGNC Symbol;Acc:HGNC:18475]	protein_coding	GO:0016409,GO:0043849,GO:0018230,GO:0018345,GO:0002178,GO:0005783,GO:0005794,GO:0005829,GO:0031228	palmitoyltransferase activity,Ras palmitoyltransferase activity,peptidyl-L-cysteine S-palmitoylation,protein palmitoylation,palmitoyltransferase complex,endoplasmic reticulum,Golgi apparatus,cytosol,intrinsic component of Golgi membrane	1.43955	6.35632	7.81056	0.0180843	0.21109	2
ENSCAFG00845027879	CD69	477698	CD69 molecule [Source:HGNC Symbol;Acc:HGNC:1694]	protein_coding	GO:0042802,GO:0032991	identical protein binding,protein-containing complex	2.99009	4.02431	7.78958	0.018204	0.211537	2
ENSCAFG00845030758	FERMT3	483766	FERM domain containing kindlin 3 [Source:HGNC Symbol;Acc:HGNC:23151]	protein_coding	GO:0007229,GO:0007229,GO:0030335,GO:0005178,GO:0033622,GO:0033622,GO:0034446,GO:0002102,GO:0007159,GO:0070527,GO:0033632,GO:0033632	integrin-mediated signaling pathway,integrin-mediated signaling pathway,positive regulation of cell migration,integrin binding,integrin activation,integrin activation,substrate adhesion-dependent cell spreading,podosome,leukocyte cell-cell adhesion,platelet aggregation,regulation of cell-cell adhesion mediated by integrin,regulation of cell-cell adhesion mediated by integrin	1.12093	5.02025	7.78084	0.0182542	0.211633	2
ENSCAFG00845019127		NA		lncRNA			2.06574	-0.537894	7.77455	0.0182904	0.211664	2
ENSCAFG00845004665	NCF2	480036	neutrophil cytosolic factor 2 [Source:NCBI gene (formerly Entrezgene);Acc:480036]	protein_coding	GO:0005515,GO:0016176,GO:0006909,GO:0045730,GO:0043020,GO:0008022,GO:0016175,GO:0031267,GO:0042554,GO:0001669,GO:0005737,GO:0005829,GO:0016020	protein binding,superoxide-generating NADPH oxidase activator activity,phagocytosis,respiratory burst,NADPH oxidase complex,protein C-terminus binding,superoxide-generating NAD(P)H oxidase activity,small GTPase binding,superoxide anion generation,acrosomal vesicle,cytoplasm,cytosol,membrane	1.80936	5.09543	7.77166	0.018307	0.211664	2
ENSCAFG00845026108	ARHGAP4	492245	Rho GTPase activating protein 4 [Source:HGNC Symbol;Acc:HGNC:674]	protein_coding	GO:0005515,GO:0007165,GO:0005737	protein binding,signal transduction,cytoplasm	1.21088	3.54726	7.75589	0.0183983	0.211872	2
ENSCAFG00845004084	RHOH	488833	ras homolog family member H [Source:HGNC Symbol;Acc:HGNC:686]	protein_coding	GO:0005525,GO:0003924,GO:0019210,GO:0030217,GO:0043124,GO:0045576,GO:0045582,GO:0001772,GO:0005737,GO:0005886	GTP binding,GTPase activity,kinase inhibitor activity,T cell differentiation,negative regulation of I-kappaB kinase/NF-kappaB signaling,mast cell activation,positive regulation of T cell differentiation,immunological synapse,cytoplasm,plasma membrane	2.32803	5.21093	7.74805	0.0184438	0.21201	2
ENSCAFG00845020734	MTMR4	480570	myotubularin related protein 4 [Source:HGNC Symbol;Acc:HGNC:7452]	protein_coding	GO:0046872,GO:0016791,GO:0004725,GO:0006470,GO:0016311,GO:0007179,GO:0004722	metal ion binding,phosphatase activity,protein tyrosine phosphatase activity,protein dephosphorylation,dephosphorylation,transforming growth factor beta receptor signaling pathway,protein serine/threonine phosphatase activity	0.613285	5.53114	7.73574	0.0185157	0.212594	2
ENSCAFG00845007973	USP15	474424	ubiquitin specific peptidase 15 [Source:HGNC Symbol;Acc:HGNC:12613]	protein_coding	GO:0003824,GO:0006511,GO:0004843,GO:0016579,GO:0004197,GO:0005160,GO:0042802,GO:0046332,GO:0061649,GO:1990380,GO:0007179,GO:0030509,GO:0035520,GO:0035616,GO:0060389,GO:1900246,GO:1905035,GO:1990167,GO:0005634,GO:0005737,GO:0005829,GO:0005886	catalytic activity,ubiquitin-dependent protein catabolic process,thiol-dependent deubiquitinase,protein deubiquitination,cysteine-type endopeptidase activity,transforming growth factor beta receptor binding,identical protein binding,SMAD binding,ubiquitin modification-dependent histone binding,Lys48-specific deubiquitinase activity,transforming growth factor beta receptor signaling pathway,BMP si…	0.750306	5.74804	7.70998	0.018667	0.213644	2
ENSCAFG00845008249	MAPK14	403856	mitogen-activated protein kinase 14 [Source:NCBI gene (formerly Entrezgene);Acc:403856]	protein_coding	GO:0005524,GO:0006468,GO:0004672,GO:0004707,GO:0038066,GO:0005737,GO:0005634,GO:0004707,GO:0010628,GO:0006357,GO:0035556,GO:0045663,GO:0019903,GO:0010831,GO:0038066,GO:1901741,GO:0098586,GO:0030316,GO:0005829,GO:0019899,GO:0060045,GO:0006468,GO:0004672,GO:0098978,GO:0000902,GO:0006355,GO:0030278,GO:0045944,GO:0006974,GO:0005739,GO:0002021,GO:0032868,GO:0016607,GO:0004674,GO:0000165,GO:0016301,GO:…	ATP binding,protein phosphorylation,protein kinase activity,MAP kinase activity,p38MAPK cascade,cytoplasm,nucleus,MAP kinase activity,positive regulation of gene expression,regulation of transcription by RNA polymerase II,intracellular signal transduction,positive regulation of myoblast differentiation,protein phosphatase binding,positive regulation of myotube differentiation,p38MAPK cascade,posi…	0.869547	8.27272	7.69519	0.0187546	0.213929	2
ENSCAFG00845013209	UBASH3B	489355	ubiquitin associated and SH3 domain containing B [Source:HGNC Symbol;Acc:HGNC:29884]	protein_coding	GO:0005515,GO:0042802,GO:0051279,GO:0030168,GO:0006469,GO:0070527,GO:0045671,GO:0043393,GO:0051219,GO:0004725,GO:0009968,GO:0035335,GO:0038063,GO:0038065,GO:0045779,GO:0090331,GO:0045670	protein binding,identical protein binding,regulation of release of sequestered calcium ion into cytosol,platelet activation,negative regulation of protein kinase activity,platelet aggregation,negative regulation of osteoclast differentiation,regulation of protein binding,phosphoprotein binding,protein tyrosine phosphatase activity,negative regulation of signal transduction,peptidyl-tyrosine depho…	1.21914	7.85919	7.68737	0.0188011	0.213929	2
ENSCAFG00845022448		NA		protein_coding	GO:0005516	calmodulin binding	2.29914	-0.235994	7.67623	0.0188677	0.214125	2
ENSCAFG00845002030	IL2RA	403870	interleukin 2 receptor subunit alpha [Source:NCBI gene (formerly Entrezgene);Acc:403870]	protein_coding	GO:0004911,GO:0019976	interleukin-2 receptor activity,interleukin-2 binding	2.01868	4.29175	7.66616	0.018928	0.214125	2
ENSCAFG00845020354	CISH	484757	cytokine inducible SH2 containing protein [Source:HGNC Symbol;Acc:HGNC:1984]	protein_coding	GO:0035556,GO:0007205,GO:0005886	intracellular signal transduction,protein kinase C-activating G protein-coupled receptor signaling pathway,plasma membrane	2.33843	4.43609	7.63079	0.0191418	0.215143	2
ENSCAFG00845023363	PLEK	442956	pleckstrin [Source:NCBI gene (formerly Entrezgene);Acc:442956]	protein_coding	GO:0035556,GO:0005080,GO:0042803,GO:0043325,GO:0002244,GO:0002576,GO:0006904,GO:0007229,GO:0010572,GO:0010920,GO:0010925,GO:0030030,GO:0030836,GO:0030845,GO:0030866,GO:0031529,GO:0031532,GO:0032233,GO:0033625,GO:0045744,GO:0046488,GO:0060305,GO:0070493,GO:0070527,GO:0070528,GO:0070560,GO:0005737,GO:0032587	intracellular signal transduction,protein kinase C binding,protein homodimerization activity,phosphatidylinositol-3,4-bisphosphate binding,hematopoietic progenitor cell differentiation,platelet degranulation,vesicle docking involved in exocytosis,integrin-mediated signaling pathway,positive regulation of platelet activation,negative regulation of inositol phosphate biosynthetic process,positive r…	2.8142	7.23973	7.62517	0.0191761	0.215409	2
ENSCAFG00845020731	RIPOR2	488247	RHO family interacting cell polarization regulator 2 [Source:HGNC Symbol;Acc:HGNC:13872]	protein_coding	GO:0007605,GO:0048741,GO:0007605,GO:0042802,GO:0045184,GO:0051491,GO:0035024,GO:0071260,GO:0032420,GO:0090023,GO:0051260,GO:1990869,GO:2000114,GO:0007162,GO:0060088,GO:1905872,GO:2000391,GO:2001107	sensory perception of sound,skeletal muscle fiber development,sensory perception of sound,identical protein binding,establishment of protein localization,positive regulation of filopodium assembly,negative regulation of Rho protein signal transduction,cellular response to mechanical stimulus,stereocilium,positive regulation of neutrophil chemotaxis,protein homooligomerization,cellular response to…	1.15523	8.02041	7.61	0.0192689	0.215967	2
ENSCAFG00845006252		100684301		lncRNA			1.46743	6.04479	7.60658	0.0192898	0.215967	2
ENSCAFG00845020506	XRCC4	488923	X-ray repair cross complementing 4 [Source:HGNC Symbol;Acc:HGNC:12831]	protein_coding	GO:0003677,GO:0005634,GO:0006310,GO:0006302,GO:0008022,GO:0042802,GO:0070975,GO:0006303,GO:0010165,GO:0051103,GO:0051351,GO:1990166,GO:0005654,GO:0005829,GO:0005958,GO:0032807,GO:0035861,GO:0070419	DNA binding,nucleus,DNA recombination,double-strand break repair,protein C-terminus binding,identical protein binding,FHA domain binding,double-strand break repair via nonhomologous end joining,response to X-ray,DNA ligation involved in DNA repair,positive regulation of ligase activity,protein localization to site of double-strand break,nucleoplasm,cytosol,DNA-dependent protein kinase-DNA ligase …	0.736638	6.15378	7.5823	0.0194397	0.216079	2
ENSCAFG00845004716	GMFG	611578	glia maturation factor gamma [Source:HGNC Symbol;Acc:HGNC:4374]	protein_coding	GO:0003779,GO:0071933,GO:0034316,GO:2000249,GO:0071846	actin binding,Arp2/3 complex binding,negative regulation of Arp2/3 complex-mediated actin nucleation,regulation of actin cytoskeleton reorganization,actin filament debranching	1.3806	4.60366	7.57325	0.0194959	0.216358	2
ENSCAFG00845030902	LIF	403449	LIF interleukin 6 family cytokine [Source:NCBI gene (formerly Entrezgene);Acc:403449]	protein_coding	GO:0005576,GO:0005125,GO:0006955,GO:0005146,GO:0005102,GO:0008083,GO:0001974,GO:0007260,GO:0007566,GO:0008284,GO:0008285,GO:0010628,GO:0019827,GO:0030324,GO:0033138,GO:0033141,GO:0033630,GO:0042531,GO:0043410,GO:0045595,GO:0045651,GO:0045835,GO:0045944,GO:0046697,GO:0046888,GO:0048286,GO:0048644,GO:0048666,GO:0048711,GO:0048861,GO:0048863,GO:0050731,GO:0060135,GO:0060426,GO:0060463,GO:0060707,GO:…	extracellular region,cytokine activity,immune response,leukemia inhibitory factor receptor binding,signaling receptor binding,growth factor activity,blood vessel remodeling,tyrosine phosphorylation of STAT protein,embryo implantation,positive regulation of cell population proliferation,negative regulation of cell population proliferation,positive regulation of gene expression,stem cell population…	4.05679	4.45679	7.56869	0.0195243	0.216534	2
ENSCAFG00845028958	CYP24A1	485935	cytochrome P450 family 24 subfamily A member 1 [Source:HGNC Symbol;Acc:HGNC:2602]	protein_coding	GO:0004497,GO:0020037,GO:0005506,GO:0016705,GO:0005654,GO:0005739,GO:0001649,GO:0033280,GO:0042359,GO:0008403,GO:0008403,GO:0030342,GO:0062180,GO:0062181,GO:0070643,GO:0042369	monooxygenase activity,heme binding,iron ion binding,oxidoreductase activity, acting on paired donors, with incorporation or reduction of molecular oxygen,nucleoplasm,mitochondrion,osteoblast differentiation,response to vitamin D,vitamin D metabolic process,25-hydroxycholecalciferol-24-hydroxylase activity,25-hydroxycholecalciferol-24-hydroxylase activity,1-alpha,25-dihydroxyvitamin D3 24-hydroxy…	1.56483	-1.8755	7.53922	0.0197091	0.216761	2
ENSCAFG00845011516	IL37,IL37	100686137,100686057	,	protein_coding,protein_coding	GO:0005125,GO:0006955,GO:0006954,GO:0005615,GO:0005149	cytokine activity,immune response,inflammatory response,extracellular space,interleukin-1 receptor binding	2.52305	4.64657	7.53686	0.019724	0.216761	2
ENSCAFG00845024871		119865809		snoRNA	GO:0006396,GO:0005730	RNA processing,nucleolus	1.23363	0.16725	7.50425	0.019931	0.217285	2
ENSCAFG00845017615	MMP9	403885	matrix metallopeptidase 9 [Source:NCBI gene (formerly Entrezgene);Acc:403885]	protein_coding	GO:0008270,GO:0006508,GO:0008237,GO:0004222,GO:0031012,GO:0001503,GO:0050900,GO:0030574,GO:0004175,GO:0008233,GO:0042802,GO:0001501,GO:0001934,GO:0007566,GO:0030198,GO:0030335,GO:0034614,GO:0035987,GO:0043065,GO:0043066,GO:0043388,GO:0045742,GO:0051549,GO:0071276,GO:0071492,GO:0090200,GO:1900122,GO:1904645,GO:1904707,GO:2000697,GO:2001243,GO:2001258,GO:2001268,GO:0005615	zinc ion binding,proteolysis,metallopeptidase activity,metalloendopeptidase activity,extracellular matrix,ossification,leukocyte migration,collagen catabolic process,endopeptidase activity,peptidase activity,identical protein binding,skeletal system development,positive regulation of protein phosphorylation,embryo implantation,extracellular matrix organization,positive regulation of cell migratio…	4.4608	5.27841	7.49319	0.0200019	0.217285	2
ENSCAFG00845010486	IL18R1,IL18R1	611442,611438	interleukin 18 receptor 1 [Source:HGNC Symbol;Acc:HGNC:5988],interleukin 18 receptor 1 [Source:HGNC Symbol;Acc:HGNC:5988]	protein_coding,protein_coding	GO:0007165,GO:0003953,GO:0042007,GO:0042008,GO:0030101,GO:0032729,GO:0035655,GO:0045063,GO:0051092,GO:0120163,GO:1901224,GO:2000556,GO:0045092,GO:0004908	signal transduction,NAD+ nucleosidase activity,interleukin-18 binding,interleukin-18 receptor activity,natural killer cell activation,positive regulation of interferon-gamma production,interleukin-18-mediated signaling pathway,T-helper 1 cell differentiation,positive regulation of NF-kappaB transcription factor activity,negative regulation of cold-induced thermogenesis,positive regulation of NIK/…	1.36324	5.51369	7.48851	0.0200319	0.217285	2
ENSCAFG00845004605	CRISPLD2	489677	cysteine rich secretory protein LCCL domain containing 2 [Source:HGNC Symbol;Acc:HGNC:25248]	protein_coding	GO:0005576,GO:0005539,GO:0008201,GO:0030198,GO:0060325,GO:0030133,GO:0031012	extracellular region,glycosaminoglycan binding,heparin binding,extracellular matrix organization,face morphogenesis,transport vesicle,extracellular matrix	1.88997	7.48859	7.48627	0.0200463	0.217285	2
ENSCAFG00845028112	RASA2	485692	RAS p21 protein activator 2 [Source:HGNC Symbol;Acc:HGNC:9872]	protein_coding	GO:0007165,GO:0005096,GO:0035556,GO:0005543,GO:0043087,GO:0046580	signal transduction,GTPase activator activity,intracellular signal transduction,phospholipid binding,regulation of GTPase activity,negative regulation of Ras protein signal transduction	0.796077	7.71807	7.48462	0.020057	0.217285	2
ENSCAFG00845012267	ZNF207	119881612	zinc finger protein 207 [Source:HGNC Symbol;Acc:HGNC:12998]	protein_coding	GO:0008017,GO:0008201,GO:0000070,GO:0007094,GO:0008608,GO:0050821,GO:0051983,GO:0090307,GO:0000776,GO:0005634,GO:0005654,GO:0005730,GO:1990047	microtubule binding,heparin binding,mitotic sister chromatid segregation,mitotic spindle assembly checkpoint signaling,attachment of spindle microtubules to kinetochore,protein stabilization,regulation of chromosome segregation,mitotic spindle assembly,kinetochore,nucleus,nucleoplasm,nucleolus,spindle matrix	0.545934	7.316	7.47375	0.0201271	0.217285	2
ENSCAFG00845029799	MYD88	477024	MYD88 innate immune signal transduction adaptor [Source:HGNC Symbol;Acc:HGNC:7562]	protein_coding	GO:0005515,GO:0007165,GO:0003953,GO:0043123,GO:0070976,GO:0002755,GO:0005149,GO:0051607,GO:0006909,GO:0005634,GO:0005737,GO:0032731,GO:0071260,GO:0070555,GO:0042802,GO:0010468,GO:0010628,GO:0005829,GO:0050830,GO:0032757,GO:0032755,GO:0051092,GO:0005886,GO:0042127,GO:0032760,GO:0043123,GO:0006954,GO:0007166,GO:0050727,GO:0002269,GO:0002283,GO:0070944,GO:1900227,GO:0032494,GO:0032496,GO:0043123,GO:…	protein binding,signal transduction,NAD+ nucleosidase activity,positive regulation of I-kappaB kinase/NF-kappaB signaling,TIR domain binding,MyD88-dependent toll-like receptor signaling pathway,interleukin-1 receptor binding,defense response to virus,phagocytosis,nucleus,cytoplasm,positive regulation of interleukin-1 beta production,cellular response to mechanical stimulus,response to interleukin…	1.18072	5.01234	7.44713	0.0203001	0.218221	2
ENSCAFG00845030351	CASP7	486896	caspase 7 [Source:HGNC Symbol;Acc:HGNC:1508]	protein_coding	GO:0006508,GO:0008234,GO:0004197,GO:0005634,GO:0005829,GO:0006508,GO:0006915,GO:0004197,GO:0007507,GO:0006915,GO:0009411,GO:0008233,GO:0016485,GO:0051402,GO:0004190,GO:0097194,GO:0097153,GO:0097200,GO:0072734	proteolysis,cysteine-type peptidase activity,cysteine-type endopeptidase activity,nucleus,cytosol,proteolysis,apoptotic process,cysteine-type endopeptidase activity,heart development,apoptotic process,response to UV,peptidase activity,protein processing,neuron apoptotic process,aspartic-type endopeptidase activity,execution phase of apoptosis,cysteine-type endopeptidase activity involved in apopt…	1.02841	5.48656	7.44053	0.0203433	0.218569	2
ENSCAFG00845017665	SLC6A14	492085		protein_coding	GO:0016021	integral component of membrane	3.25597	3.2735	7.43192	0.0203998	0.21857	2
ENSCAFG00845009518	HSPA5	480726	heat shock protein family A (Hsp70) member 5 [Source:HGNC Symbol;Acc:HGNC:5238]	protein_coding	GO:0005524,GO:0016887,GO:0005524,GO:0005737,GO:0005634,GO:0005739,GO:0005829,GO:0005788,GO:0043231,GO:0030496,GO:0008180,GO:0005793,GO:0032991,GO:0043066,GO:0030335,GO:0009986,GO:0019899,GO:0005886,GO:0019904,GO:0031625,GO:0043022,GO:0034663,GO:0005783,GO:0071353,GO:0031398,GO:0051603,GO:0042149,GO:0030512,GO:0005789,GO:1901998,GO:0031204,GO:0006983,GO:0016887,GO:0051787,GO:0021589,GO:0021680,GO:…	ATP binding,ATPase,ATP binding,cytoplasm,nucleus,mitochondrion,cytosol,endoplasmic reticulum lumen,intracellular membrane-bounded organelle,midbody,COP9 signalosome,endoplasmic reticulum-Golgi intermediate compartment,protein-containing complex,negative regulation of apoptotic process,positive regulation of cell migration,cell surface,enzyme binding,plasma membrane,protein domain specific binding…	1.01479	7.07142	7.43184	0.0204003	0.21857	2
ENSCAFG00845001039		NA		lncRNA			2.10481	-0.0212477	7.43063	0.0204083	0.21857	2
ENSCAFG00845007967	GAB2	485167	GRB2 associated binding protein 2 [Source:HGNC Symbol;Acc:HGNC:14458]	protein_coding	GO:0005737,GO:0005886,GO:0008284,GO:0005068,GO:0030316	cytoplasm,plasma membrane,positive regulation of cell population proliferation,transmembrane receptor protein tyrosine kinase adaptor activity,osteoclast differentiation	1.00006	9.51924	7.42767	0.0204278	0.218663	2
ENSCAFG00845002210	CHD1	488891	chromodomain helicase DNA binding protein 1 [Source:HGNC Symbol;Acc:HGNC:1915]	protein_coding	GO:0005524,GO:0070615,GO:0000228,GO:0005634,GO:0035064,GO:0016569,GO:0043923,GO:0005737	ATP binding,nucleosome-dependent ATPase activity,nuclear chromosome,nucleus,methylated histone binding,covalent chromatin modification,positive regulation by host of viral transcription,cytoplasm	0.623445	7.01272	7.37765	0.0207602	0.22082	2
ENSCAFG00845024028	FAM71F2	608767	family with sequence similarity 71 member F2 [Source:HGNC Symbol;Acc:HGNC:27998]	protein_coding			2.02025	-0.999194	7.36388	0.0208529	0.221108	2
ENSCAFG00845011550	ITGAM	489928	integrin subunit alpha M [Source:HGNC Symbol;Acc:HGNC:6149]	protein_coding	GO:0007155,GO:0008305,GO:0031072,GO:0010668,GO:0032930,GO:0043315,GO:0005615,GO:0005886,GO:0009986,GO:0044853	cell adhesion,integrin complex,heat shock protein binding,ectodermal cell differentiation,positive regulation of superoxide anion generation,positive regulation of neutrophil degranulation,extracellular space,plasma membrane,cell surface,plasma membrane raft	2.13221	6.18869	7.30415	0.0212607	0.224258	2
ENSCAFG00845009539	PKIB,PKIB,PKIB	100683903,476279,476278	sphingomyelin phosphodiesterase acid like 3A [Source:HGNC Symbol;Acc:HGNC:17389],sphingomyelin phosphodiesterase acid like 3A [Source:HGNC Symbol;Acc:HGNC:17389],sphingomyelin phosphodiesterase acid like 3A [Source:HGNC Symbol;Acc:HGNC:17389]	protein_coding,protein_coding,protein_coding	GO:0008289,GO:0004862,GO:0006469,GO:0016787,GO:0005615,GO:0004767,GO:0006685,GO:0005615,GO:0008270,GO:0009143,GO:0008081	lipid binding,cAMP-dependent protein kinase inhibitor activity,negative regulation of protein kinase activity,hydrolase activity,extracellular space,sphingomyelin phosphodiesterase activity,sphingomyelin catabolic process,extracellular space,zinc ion binding,nucleoside triphosphate catabolic process,phosphoric diester hydrolase activity	2.64425	7.35023	7.2948	0.0213254	0.224472	2
ENSCAFG00845010365	SHMT2	607458	serine hydroxymethyltransferase 2 [Source:HGNC Symbol;Acc:HGNC:10852]	protein_coding	GO:0003824,GO:0030170,GO:0004372,GO:0019264,GO:0035999,GO:0005737,GO:0005634,GO:0005739,GO:0005743,GO:0004372,GO:0006730,GO:0051289,GO:0070536,GO:0070552,GO:0005759,GO:0030170,GO:0003682,GO:0042645,GO:0015630,GO:1903715,GO:0051262,GO:0070129,GO:0004372,GO:0002082,GO:0006544,GO:0006563,GO:0034340,GO:0035999,GO:0046653	catalytic activity,pyridoxal phosphate binding,glycine hydroxymethyltransferase activity,glycine biosynthetic process from serine,tetrahydrofolate interconversion,cytoplasm,nucleus,mitochondrion,mitochondrial inner membrane,glycine hydroxymethyltransferase activity,one-carbon metabolic process,protein homotetramerization,protein K63-linked deubiquitination,BRISC complex,mitochondrial matrix,pyrid…	1.18946	3.18857	7.27972	0.0214303	0.225107	2
ENSCAFG00845025535	FNDC3B	488169	fibronectin type III domain containing 3B [Source:HGNC Symbol;Acc:HGNC:24670]	protein_coding	GO:0005515	protein binding	1.48393	10.0127	7.25816	0.0215813	0.225753	2
ENSCAFG00845017455	U2AF1	478422		protein_coding	GO:0046872,GO:0003723,GO:0003676,GO:0000398,GO:0089701,GO:0050733,GO:0016607	metal ion binding,RNA binding,nucleic acid binding,mRNA splicing, via spliceosome,U2AF complex,RS domain binding,nuclear speck	0.998166	5.79306	7.23074	0.0217752	0.226038	2
ENSCAFG00845011706	NFKBIE	102155642	NFKB inhibitor epsilon [Source:HGNC Symbol;Acc:HGNC:7799]	protein_coding	GO:0005515,GO:0005829,GO:0005654,GO:0001650	protein binding,cytosol,nucleoplasm,fibrillar center	1.34247	4.79889	7.17301	0.0221904	0.228061	2
ENSCAFG00845001488	TNFRSF1B	487437	TNF receptor superfamily member 1B [Source:HGNC Symbol;Acc:HGNC:11917]	protein_coding	GO:0005515,GO:0016020,GO:0006954,GO:0005031,GO:0031625,GO:0016020,GO:0071222,GO:0050728,GO:0006954,GO:0007166,GO:0008630,GO:0050779,GO:0097191,GO:0005031,GO:0043120,GO:0002718,GO:0002724,GO:0003176,GO:0003177,GO:0003332,GO:0010614,GO:0031641,GO:0031643,GO:0042129,GO:0048714,GO:0051044,GO:0060548,GO:0150077,GO:0150079,GO:0150098,GO:1901215,GO:1902339,GO:2001141,GO:0045121	protein binding,membrane,inflammatory response,tumor necrosis factor-activated receptor activity,ubiquitin protein ligase binding,membrane,cellular response to lipopolysaccharide,negative regulation of inflammatory response,inflammatory response,cell surface receptor signaling pathway,intrinsic apoptotic signaling pathway in response to DNA damage,RNA destabilization,extrinsic apoptotic signaling…	1.69419	6.46694	7.15282	0.0223378	0.228934	2
ENSCAFG00845030863	ATP13A3	478607	ATPase 13A3 [Source:HGNC Symbol;Acc:HGNC:24113]	protein_coding	GO:0016021,GO:0005524,GO:0000166,GO:0006812,GO:0019829,GO:0140603,GO:0005215	integral component of membrane,ATP binding,nucleotide binding,cation transport,ATPase-coupled cation transmembrane transporter activity,ATP hydrolysis activity,transporter activity	1.02788	7.58621	7.14069	0.022427	0.229383	2
ENSCAFG00845008036	IL23A	481110	interleukin 23 subunit alpha [Source:HGNC Symbol;Acc:HGNC:15488]	protein_coding	GO:0005576,GO:0005125,GO:0006955,GO:0045519,GO:0001916,GO:0002230,GO:0002827,GO:0010536,GO:0032693,GO:0032725,GO:0032729,GO:0032733,GO:0032735,GO:0032740,GO:0032760,GO:0032819,GO:0042098,GO:0042102,GO:0042104,GO:0042509,GO:0042531,GO:0043382,GO:0045672,GO:0045944,GO:0050829,GO:0051135,GO:0051142,GO:0090023,GO:2000318,GO:2000330,GO:0005615,GO:0070743	extracellular region,cytokine activity,immune response,interleukin-23 receptor binding,positive regulation of T cell mediated cytotoxicity,positive regulation of defense response to virus by host,positive regulation of T-helper 1 type immune response,positive regulation of activation of Janus kinase activity,negative regulation of interleukin-10 production,positive regulation of granulocyte macro…	1.52336	2.59704	7.12552	0.0225391	0.230032	2
ENSCAFG00845027609		100855935		protein_coding	GO:0003677,GO:0005634,GO:0003824,GO:0003697,GO:0006289,GO:0016788,GO:0004519,GO:0004518	DNA binding,nucleus,catalytic activity,single-stranded DNA binding,nucleotide-excision repair,hydrolase activity, acting on ester bonds,endonuclease activity,nuclease activity	0.698214	6.40072	7.1248	0.0225444	0.230032	2
ENSCAFG00845013492	ARHGAP45	612358	Rho GTPase activating protein 45 [Source:HGNC Symbol;Acc:HGNC:17102]	protein_coding	GO:0007165,GO:0035556	signal transduction,intracellular signal transduction	0.909603	4.7138	7.11012	0.0226536	0.230314	2
ENSCAFG00845013441	TTC39C	480172	tetratricopeptide repeat domain 39C [Source:HGNC Symbol;Acc:HGNC:26595]	protein_coding	GO:0005515	protein binding	1.8221	6.51263	7.08925	0.0228098	0.230314	2
ENSCAFG00845029201	PI15	487003	peptidase inhibitor 15 [Source:HGNC Symbol;Acc:HGNC:8946]	protein_coding	GO:0005576	extracellular region	2.30901	5.22327	7.08713	0.0228258	0.230314	2
ENSCAFG00845009101	CHD1L	475820	chromodomain helicase DNA binding protein 1 like [Source:HGNC Symbol;Acc:HGNC:1916]	protein_coding	GO:0005524,GO:0003678,GO:0006281,GO:0006338,GO:0000166,GO:0070615,GO:0005634,GO:0006974,GO:0016887,GO:0006338,GO:0005829,GO:0005886,GO:0005654	ATP binding,DNA helicase activity,DNA repair,chromatin remodeling,nucleotide binding,nucleosome-dependent ATPase activity,nucleus,cellular response to DNA damage stimulus,ATPase,chromatin remodeling,cytosol,plasma membrane,nucleoplasm	1.25459	6.5122	7.07534	0.0229148	0.230314	2
ENSCAFG00845029791	GGH	100856436	gamma-glutamyl hydrolase [Source:HGNC Symbol;Acc:HGNC:4248]	protein_coding	GO:0016787,GO:0008242,GO:0005615,GO:0034722	hydrolase activity,omega peptidase activity,extracellular space,gamma-glutamyl-peptidase activity	1.62398	7.13732	7.06947	0.0229592	0.230515	2
ENSCAFG00845025664		608424		protein_coding	GO:0009409,GO:0014850,GO:0050728,GO:0090336	response to cold,response to muscle activity,negative regulation of inflammatory response,positive regulation of brown fat cell differentiation	1.58985	4.26313	7.05942	0.0230355	0.230981	2
ENSCAFG00845001127	PIK3R5	612805	phosphoinositide-3-kinase regulatory subunit 5 [Source:HGNC Symbol;Acc:HGNC:30035]	protein_coding	GO:0046935,GO:0005944,GO:0005829,GO:0034451	1-phosphatidylinositol-3-kinase regulator activity,phosphatidylinositol 3-kinase complex, class IB,cytosol,centriolar satellite	1.33327	6.5835	7.04182	0.0231699	0.230981	2
ENSCAFG00845020698	HCLS1	100684969	hematopoietic cell-specific Lyn substrate 1 [Source:HGNC Symbol;Acc:HGNC:4844]	protein_coding	GO:0005515,GO:0003779,GO:0030041,GO:0005737,GO:0005634,GO:0030218,GO:0009725,GO:0008284,GO:0051091,GO:0005829,GO:0005886,GO:0061629,GO:0000122,GO:0045944,GO:0014068,GO:0044877,GO:0019901,GO:0050731,GO:0051897,GO:0005667,GO:0045651,GO:0033138,GO:0017124,GO:0042531,GO:0042307,GO:0071345,GO:0030833,GO:0030854,GO:2000107	protein binding,actin binding,actin filament polymerization,cytoplasm,nucleus,erythrocyte differentiation,response to hormone,positive regulation of cell population proliferation,positive regulation of DNA-binding transcription factor activity,cytosol,plasma membrane,RNA polymerase II-specific DNA-binding transcription factor binding,negative regulation of transcription by RNA polymerase II,posit…	1.40358	5.45183	7.03404	0.0232296	0.230981	2
ENSCAFG00845030908	OSM	611921	oncostatin M [Source:HGNC Symbol;Acc:HGNC:8506]	protein_coding	GO:0005576,GO:0005125,GO:0006955,GO:0005147,GO:0038165,GO:0008083,GO:0008284,GO:0014068,GO:0032740,GO:0033138,GO:0042531,GO:0043410,GO:0045944,GO:0046888,GO:0050729,GO:0050731,GO:0051897	extracellular region,cytokine activity,immune response,oncostatin-M receptor binding,oncostatin-M-mediated signaling pathway,growth factor activity,positive regulation of cell population proliferation,positive regulation of phosphatidylinositol 3-kinase signaling,positive regulation of interleukin-17 production,positive regulation of peptidyl-serine phosphorylation,positive regulation of tyrosine…	2.8232	4.43108	7.03304	0.0232373	0.230981	2
ENSCAFG00845016131	SPP1	478471	secreted phosphoprotein 1 [Source:HGNC Symbol;Acc:HGNC:11255]	protein_coding	GO:0007155,GO:0001503,GO:0005615,GO:0005794,GO:0045893,GO:0007155,GO:0033280,GO:0005178,GO:0006710,GO:0071394,GO:2000866	cell adhesion,ossification,extracellular space,Golgi apparatus,positive regulation of transcription, DNA-templated,cell adhesion,response to vitamin D,integrin binding,androgen catabolic process,cellular response to testosterone stimulus,positive regulation of estradiol secretion	3.70557	6.17509	7.02352	0.0233107	0.230981	2
ENSCAFG00845015213		608975		protein_coding			1.99055	5.151	7.0215	0.0233263	0.230981	2
ENSCAFG00845005205	RNF19B	478146	ring finger protein 19B [Source:HGNC Symbol;Acc:HGNC:26886]	protein_coding	GO:0004842,GO:0016567,GO:0005783,GO:0061630,GO:0043130,GO:0051865,GO:0005829,GO:0042267,GO:0044194	ubiquitin-protein transferase activity,protein ubiquitination,endoplasmic reticulum,ubiquitin protein ligase activity,ubiquitin binding,protein autoubiquitination,cytosol,natural killer cell mediated cytotoxicity,cytolytic granule	1.55041	5.41512	7.01659	0.0233643	0.230981	2
ENSCAFG00845012294	TRIB1	482039	tribbles pseudokinase 1 [Source:NCBI gene (formerly Entrezgene);Acc:482039]	protein_coding	GO:0005524,GO:0006468,GO:0004672	ATP binding,protein phosphorylation,protein kinase activity	1.36999	6.17402	7.01458	0.0233798	0.230981	2
ENSCAFG00845025327	B4GALT5	485920	beta-1,4-galactosyltransferase 5 [Source:HGNC Symbol;Acc:HGNC:928]	protein_coding	GO:0005975,GO:0016757,GO:0006486,GO:0040019,GO:0031647,GO:0021955,GO:0010706,GO:0022010,GO:0030311,GO:0003945,GO:0008489,GO:0042551	carbohydrate metabolic process,glycosyltransferase activity,protein glycosylation,positive regulation of embryonic development,regulation of protein stability,central nervous system neuron axonogenesis,ganglioside biosynthetic process via lactosylceramide,central nervous system myelination,poly-N-acetyllactosamine biosynthetic process,N-acetyllactosamine synthase activity,UDP-galactose:glucosylce…	1.41983	8.02193	7.01425	0.0233824	0.230981	2
ENSCAFG00845003156	FYB1	479355	FYN binding protein 1 [Source:HGNC Symbol;Acc:HGNC:4036]	protein_coding	GO:0005886,GO:0005515,GO:0008289,GO:0006955,GO:0015629,GO:0007229,GO:0032991,GO:0005886,GO:0072659	plasma membrane,protein binding,lipid binding,immune response,actin cytoskeleton,integrin-mediated signaling pathway,protein-containing complex,plasma membrane,protein localization to plasma membrane	1.35903	7.23296	7.00853	0.0234268	0.231066	2
ENSCAFG00845019624	QPCT	403861	glutaminyl-peptide cyclotransferase [Source:HGNC Symbol;Acc:HGNC:9753]	protein_coding	GO:0016603,GO:0008235,GO:0008270,GO:0017186	glutaminyl-peptide cyclotransferase activity,metalloexopeptidase activity,zinc ion binding,peptidyl-pyroglutamic acid biosynthetic process, using glutaminyl-peptide cyclotransferase	1.16817	3.6561	6.994	0.0235399	0.231066	2
ENSCAFG00845011569	MAP3K8	487085	mitogen-activated protein kinase kinase kinase 8 [Source:HGNC Symbol;Acc:HGNC:6860]	protein_coding	GO:0005524,GO:0006468,GO:0004672,GO:0005829	ATP binding,protein phosphorylation,protein kinase activity,cytosol	1.43625	5.8556	6.99259	0.0235509	0.231066	2
ENSCAFG00845030401	HSH2D	484852	hematopoietic SH2 domain containing [Source:HGNC Symbol;Acc:HGNC:24920]	protein_coding	GO:0007165,GO:0030674,GO:0002903,GO:0042110,GO:0051902,GO:0005739,GO:0005829	signal transduction,protein-macromolecule adaptor activity,negative regulation of B cell apoptotic process,T cell activation,negative regulation of mitochondrial depolarization,mitochondrion,cytosol	1.45454	2.42433	6.98303	0.0236258	0.231352	2
ENSCAFG00845024319	KPNA2	480469		protein_coding	GO:0005515,GO:0005737,GO:0061608,GO:0006606	protein binding,cytoplasm,nuclear import signal receptor activity,protein import into nucleus	1.14603	4.89794	6.95524	0.0238451	0.232306	2
ENSCAFG00845024451	IL1RAP	488126	interleukin 1 receptor accessory protein [Source:HGNC Symbol;Acc:HGNC:5995]	protein_coding	GO:0007165,GO:0003953,GO:0004908,GO:0002114,GO:0019221,GO:0032736,GO:0032753,GO:0032754,GO:0032755,GO:0038172,GO:0051092,GO:0051965,GO:0099151,GO:0099545,GO:0099560,GO:1905606,GO:0098978	signal transduction,NAD+ nucleosidase activity,interleukin-1 receptor activity,interleukin-33 receptor activity,cytokine-mediated signaling pathway,positive regulation of interleukin-13 production,positive regulation of interleukin-4 production,positive regulation of interleukin-5 production,positive regulation of interleukin-6 production,interleukin-33-mediated signaling pathway,positive regulat…	1.72647	8.19784	6.92396	0.0240948	0.233287	2
ENSCAFG00845006117	RELB	484454	RELB proto-oncogene, NF-kB subunit [Source:HGNC Symbol;Acc:HGNC:9956]	protein_coding	GO:0003677,GO:0006355,GO:0005634,GO:0005737,GO:0003700,GO:0006357,GO:0005813,GO:0032922,GO:0019901,GO:0032991,GO:0045892,GO:0000978,GO:0017053,GO:0005829,GO:0005654,GO:0042802,GO:0005634,GO:0000785,GO:0003677,GO:0010628,GO:0043011,GO:0019882,GO:0038061,GO:0042088,GO:0045063,GO:0030098,GO:0032688	DNA binding,regulation of transcription, DNA-templated,nucleus,cytoplasm,DNA-binding transcription factor activity,regulation of transcription by RNA polymerase II,centrosome,circadian regulation of gene expression,protein kinase binding,protein-containing complex,negative regulation of transcription, DNA-templated,RNA polymerase II cis-regulatory region sequence-specific DNA binding,transcriptio…	1.11104	5.56074	6.91656	0.0241543	0.233579	2
ENSCAFG00845020197	WDFY4	486770	WDFY family member 4 [Source:HGNC Symbol;Acc:HGNC:29323]	protein_coding	GO:0005515,GO:0019882,GO:0036037,GO:0098586	protein binding,antigen processing and presentation,CD8-positive, alpha-beta T cell activation,cellular response to virus	1.23033	8.07769	6.89157	0.0243567	0.234415	2
ENSCAFG00845027621	ICAM3	100683931	intercellular adhesion molecule 3 [Source:HGNC Symbol;Acc:HGNC:5346]	protein_coding	GO:0016020,GO:0098609,GO:0005178	membrane,cell-cell adhesion,integrin binding	1.2586	3.28305	6.87086	0.024526	0.235271	2
ENSCAFG00845005879	TNIP1	489178	TNFAIP3 interacting protein 1 [Source:HGNC Symbol;Acc:HGNC:16903]	protein_coding	GO:0002755,GO:0050727,GO:0070373,GO:0043124,GO:0042802,GO:0051019,GO:0007159,GO:0009101,GO:1903003,GO:0005654,GO:0005829	MyD88-dependent toll-like receptor signaling pathway,regulation of inflammatory response,negative regulation of ERK1 and ERK2 cascade,negative regulation of I-kappaB kinase/NF-kappaB signaling,identical protein binding,mitogen-activated protein kinase binding,leukocyte cell-cell adhesion,glycoprotein biosynthetic process,positive regulation of protein deubiquitination,nucleoplasm,cytosol	2.00349	7.48378	6.86443	0.0245788	0.235557	2
ENSCAFG00845021139	RAB1A	403774	RAB1A, member RAS onco family [Source:NCBI gene (formerly Entrezgene);Acc:403774]	protein_coding	GO:0005525,GO:0003924,GO:0006897,GO:0042470,GO:0006914,GO:0003924,GO:0042742,GO:0000045,GO:0006888,GO:0032757,GO:0007030,GO:0016477,GO:0032402,GO:0005794,GO:0034446,GO:0047496,GO:0019068,GO:0030252,GO:0090110,GO:1903020	GTP binding,GTPase activity,endocytosis,melanosome,autophagy,GTPase activity,defense response to bacterium,autophagosome assembly,endoplasmic reticulum to Golgi vesicle-mediated transport,positive regulation of interleukin-8 production,Golgi organization,cell migration,melanosome transport,Golgi apparatus,substrate adhesion-dependent cell spreading,vesicle transport along microtubule,virion assem…	0.65875	7.79624	6.82731	0.0248866	0.235673	2
ENSCAFG00845003068	PANK3	489133	pantothenate kinase 3 [Source:HGNC Symbol;Acc:HGNC:19365]	protein_coding	GO:0005524,GO:0015937,GO:0004594,GO:0019842,GO:0042803,GO:1905502,GO:0016310,GO:0005737,GO:0005829	ATP binding,coenzyme A biosynthetic process,pantothenate kinase activity,vitamin binding,protein homodimerization activity,acetyl-CoA binding,phosphorylation,cytoplasm,cytosol	1.35392	8.28166	6.81222	0.0250131	0.235806	2
ENSCAFG00845015232		NA		protein_coding	GO:0005975,GO:0003824,GO:0016491,GO:0016616,GO:0019752,GO:0004459	carbohydrate metabolic process,catalytic activity,oxidoreductase activity,oxidoreductase activity, acting on the CH-OH group of donors, NAD or NADP as acceptor,carboxylic acid metabolic process,L-lactate dehydrogenase activity	1.53745	1.9613	6.76182	0.025441	0.236649	2
ENSCAFG00845003842		NA		lncRNA			2.00544	4.24027	6.76136	0.025445	0.236649	2
ENSCAFG00845014410	CAPG	483082	capping actin protein, gelsolin like [Source:HGNC Symbol;Acc:HGNC:1474]	protein_coding	GO:0051015,GO:0051016,GO:0005737,GO:0005634,GO:0005814,GO:0005730,GO:0044877,GO:0072686,GO:0005654,GO:0019904,GO:0090543	actin filament binding,barbed-end actin filament capping,cytoplasm,nucleus,centriole,nucleolus,protein-containing complex binding,mitotic spindle,nucleoplasm,protein domain specific binding,Flemming body	0.846298	5.19802	6.75205	0.0255251	0.236663	2
ENSCAFG00845020598		NA		lncRNA			1.7508	-1.27124	6.73113	0.025706	0.237687	2
ENSCAFG00845012654		NA		lncRNA			1.29168	5.261	6.725	0.0257593	0.237866	2
ENSCAFG00845011748	HIVEP2	484014	HIVEP zinc finger 2 [Source:HGNC Symbol;Acc:HGNC:4921]	protein_coding	GO:0005654	nucleoplasm	0.800236	9.00963	6.70387	0.0259441	0.238317	2
ENSCAFG00845009357	PXT1	106559581	peroxisomal testis enriched protein 1 [Source:HGNC Symbol;Acc:HGNC:18312]	protein_coding			1.20011	-0.0168074	6.70012	0.0259771	0.238341	2
ENSCAFG00845028125	PROKR2	485779	prokineticin receptor 2 [Source:HGNC Symbol;Acc:HGNC:15836]	protein_coding	GO:0007186,GO:0016021,GO:0004930,GO:0004983,GO:0005886,GO:0007623	G protein-coupled receptor signaling pathway,integral component of membrane,G protein-coupled receptor activity,neuropeptide Y receptor activity,plasma membrane,circadian rhythm	1.31138	-0.383185	6.69864	0.0259901	0.238353	2
ENSCAFG00845010347	CSF3	608246	colony stimulating factor 3 [Source:HGNC Symbol;Acc:HGNC:2438]	protein_coding	GO:0005576,GO:0005125,GO:0006955,GO:0045639,GO:0005130,GO:0019899,GO:0014068,GO:0030838,GO:0032092,GO:0033138,GO:0045944,GO:0050731,GO:0051091,GO:0051897,GO:0071345,GO:2000251	extracellular region,cytokine activity,immune response,positive regulation of myeloid cell differentiation,granulocyte colony-stimulating factor receptor binding,enzyme binding,positive regulation of phosphatidylinositol 3-kinase signaling,positive regulation of actin filament polymerization,positive regulation of protein binding,positive regulation of peptidyl-serine phosphorylation,positive reg…	7.89657	6.30687	6.67556	0.0261943	0.239331	2
ENSCAFG00845028659	DOK2	486133	docking protein 2 [Source:HGNC Symbol;Acc:HGNC:2991]	protein_coding	GO:0007169,GO:0005068,GO:0007265	transmembrane receptor protein tyrosine kinase signaling pathway,transmembrane receptor protein tyrosine kinase adaptor activity,Ras protein signal transduction	1.231	3.69732	6.65852	0.0263463	0.239987	2
ENSCAFG00845014476	DNAH17	475921	dynein axonemal heavy chain 17 [Source:HGNC Symbol;Acc:HGNC:2946]	protein_coding	GO:0005524,GO:0030286,GO:0007018,GO:0008569,GO:0036158,GO:0051959,GO:0045505,GO:0036126,GO:0005930,GO:0036157	ATP binding,dynein complex,microtubule-based movement,ATP-dependent microtubule motor activity, minus-end-directed,outer dynein arm assembly,dynein light intermediate chain binding,dynein intermediate chain binding,sperm flagellum,axoneme,outer dynein arm	2.47873	4.98971	6.64234	0.0264915	0.240312	2
ENSCAFG00845002176		489841		protein_coding			1.94588	4.81673	6.64179	0.0264965	0.240312	2
ENSCAFG00845026107	PTPN6	486717	protein tyrosine phosphatase non-receptor type 6 [Source:HGNC Symbol;Acc:HGNC:9658]	protein_coding	GO:0016791,GO:0004725,GO:0006470,GO:0016311,GO:0001784,GO:0005001,GO:0017124,GO:0019901,GO:0042169,GO:0050839,GO:0140031,GO:0002244,GO:0002924,GO:0008284,GO:0014068,GO:0018108,GO:0030154,GO:0030220,GO:0032715,GO:0032720,GO:0033007,GO:0033277,GO:0033630,GO:0035335,GO:0035556,GO:0035855,GO:0042130,GO:0042267,GO:0043407,GO:0043409,GO:0045577,GO:0050732,GO:0050853,GO:0050860,GO:0051279,GO:0070372,GO:…	phosphatase activity,protein tyrosine phosphatase activity,protein dephosphorylation,dephosphorylation,phosphotyrosine residue binding,transmembrane receptor protein tyrosine phosphatase activity,SH3 domain binding,protein kinase binding,SH2 domain binding,cell adhesion molecule binding,phosphorylation-dependent protein binding,hematopoietic progenitor cell differentiation,negative regulation of …	1.0469	4.62453	6.64	0.0265127	0.240312	2
ENSCAFG00845009774	CSF2	403923	colony stimulating factor 2 [Source:NCBI gene (formerly Entrezgene);Acc:403923]	protein_coding	GO:0005576,GO:0008083,GO:0006955,GO:0005129,GO:0005125,GO:0005615,GO:0045892,GO:0008284,GO:0043231,GO:0010628,GO:0010744,GO:0043011,GO:0042531,GO:0030225,GO:0032747,GO:0071803,GO:0097011,GO:0097028,GO:2001240	extracellular region,growth factor activity,immune response,granulocyte macrophage colony-stimulating factor receptor binding,cytokine activity,extracellular space,negative regulation of transcription, DNA-templated,positive regulation of cell population proliferation,intracellular membrane-bounded organelle,positive regulation of gene expression,positive regulation of macrophage derived foam cel…	3.63145	0.780411	6.61824	0.0267098	0.241127	2
ENSCAFG00845021095	PLSCR1	100688853		protein_coding	GO:0017128,GO:0017121	phospholipid scramblase activity,plasma membrane phospholipid scrambling	1.10444	-0.0870865	6.60668	0.0268152	0.241342	2
ENSCAFG00845006596		NA		protein_coding	GO:0061608,GO:0006606	nuclear import signal receptor activity,protein import into nucleus	1.3516	2.65971	6.59301	0.0269406	0.241593	2
ENSCAFG00845023265	ACSL1	475631	acyl-CoA synthetase long chain family member 1 [Source:HGNC Symbol;Acc:HGNC:3569]	protein_coding	GO:0005739,GO:0005783,GO:0120162,GO:0008610,GO:0001676,GO:0044539,GO:0004467,GO:0033211,GO:0071902,GO:0015908	mitochondrion,endoplasmic reticulum,positive regulation of cold-induced thermogenesis,lipid biosynthetic process,long-chain fatty acid metabolic process,long-chain fatty acid import into cell,long-chain fatty acid-CoA ligase activity,adiponectin-activated signaling pathway,positive regulation of protein serine/threonine kinase activity,fatty acid transport	0.992562	7.3874	6.57328	0.0271227	0.242582	2
ENSCAFG00845028629		NA		protein_coding	GO:0005975,GO:0003824,GO:0016491,GO:0016616,GO:0019752,GO:0004459	carbohydrate metabolic process,catalytic activity,oxidoreductase activity,oxidoreductase activity, acting on the CH-OH group of donors, NAD or NADP as acceptor,carboxylic acid metabolic process,L-lactate dehydrogenase activity	2.1204	0.586182	6.55416	0.0273007	0.243279	2
ENSCAFG00845001249	HBEGF	607007	heparin binding EGF like growth factor [Source:HGNC Symbol;Acc:HGNC:3059]	protein_coding	GO:0005154,GO:0008083,GO:0008201,GO:0008201,GO:0048661,GO:0030335,GO:0060326,GO:0016477,GO:0005615,GO:0008284,GO:0009986,GO:0050731,GO:0007173,GO:0008016,GO:0005154,GO:0007173,GO:0035313,GO:0051549,GO:0051897,GO:0090303,GO:0005887	epidermal growth factor receptor binding,growth factor activity,heparin binding,heparin binding,positive regulation of smooth muscle cell proliferation,positive regulation of cell migration,cell chemotaxis,cell migration,extracellular space,positive regulation of cell population proliferation,cell surface,positive regulation of peptidyl-tyrosine phosphorylation,epidermal growth factor receptor si…	2.40519	4.6336	6.54335	0.0274018	0.243542	2
ENSCAFG00845005962	FMNL1	490927	formin like 1 [Source:HGNC Symbol;Acc:HGNC:1212]	protein_coding	GO:0003779,GO:0007010,GO:0008360,GO:0030036,GO:0016043,GO:0022604,GO:0031267,GO:0032794,GO:0030866,GO:0005829	actin binding,cytoskeleton organization,regulation of cell shape,actin cytoskeleton organization,cellular component organization,regulation of cell morphogenesis,small GTPase binding,GTPase activating protein binding,cortical actin cytoskeleton organization,cytosol	1.01091	5.19168	6.52602	0.0275651	0.244056	2
ENSCAFG00845013082	PLA2G7	403848	phospholipase A2 group VII [Source:NCBI gene (formerly Entrezgene);Acc:403848]	protein_coding	GO:0016042,GO:0003847,GO:0005543,GO:0047499,GO:0034374,GO:0034440,GO:0034441,GO:0034638,GO:0046469,GO:0062234,GO:0090026,GO:0034362,GO:0034364	lipid catabolic process,1-alkyl-2-acetylglycerophosphocholine esterase activity,phospholipid binding,calcium-independent phospholipase A2 activity,low-density lipoprotein particle remodeling,lipid oxidation,plasma lipoprotein particle oxidation,phosphatidylcholine catabolic process,platelet activating factor metabolic process,platelet activating factor catabolic process,positive regulation of mon…	1.49177	6.57165	6.52235	0.0275998	0.24412	2
ENSCAFG00845003852	MT2A	403768	metallothionein 1H [Source:NCBI gene (formerly Entrezgene);Acc:403768]	protein_coding	GO:0046872	metal ion binding	2.53159	3.65005	6.52109	0.0276117	0.24412	2
ENSCAFG00845001713		NA		lncRNA			2.43176	3.06838	6.51723	0.0276483	0.24412	2
ENSCAFG00845014799		NA		lncRNA			1.69793	2.14233	6.51508	0.0276688	0.24412	2
ENSCAFG00845028646	TKT	476588	transketolase [Source:HGNC Symbol;Acc:HGNC:11834]	protein_coding	GO:0003824,GO:0000287,GO:0005509,GO:0006098,GO:0042803,GO:0005654,GO:0016604,GO:0040008,GO:0004802,GO:0046166	catalytic activity,magnesium ion binding,calcium ion binding,pentose-phosphate shunt,protein homodimerization activity,nucleoplasm,nuclear body,regulation of growth,transketolase activity,glyceraldehyde-3-phosphate biosynthetic process	1.12441	7.76807	6.47718	0.0280314	0.245287	2
ENSCAFG00845027587	PLCB2	100856190	phospholipase C beta 2 [Source:HGNC Symbol;Acc:HGNC:9055]	protein_coding	GO:0007165,GO:0005509,GO:0035556,GO:0006629,GO:0016042,GO:0004435,GO:0008081,GO:0004629,GO:0004435,GO:0046488,GO:0005737,GO:0050913	signal transduction,calcium ion binding,intracellular signal transduction,lipid metabolic process,lipid catabolic process,phosphatidylinositol phospholipase C activity,phosphoric diester hydrolase activity,phospholipase C activity,phosphatidylinositol phospholipase C activity,phosphatidylinositol metabolic process,cytoplasm,sensory perception of bitter taste	0.951044	4.75206	6.46889	0.0281116	0.245776	2
ENSCAFG00845026791	SORCS1	477816	sortilin related VPS10 domain containing receptor 1 [Source:HGNC Symbol;Acc:HGNC:16697]	protein_coding	GO:0016021,GO:0005515,GO:0016020	integral component of membrane,protein binding,membrane	1.24949	6.75627	6.42212	0.0285688	0.247739	2
ENSCAFG00845011521	CENPL	611220	centromere protein L [Source:HGNC Symbol;Acc:HGNC:17879]	protein_coding			1.15047	0.966094	6.40546	0.0287338	0.247857	2
ENSCAFG00845026193	CEBPB	100856480	CCAAT enhancer binding protein beta [Source:HGNC Symbol;Acc:HGNC:1834]	protein_coding	GO:0006355,GO:0003700,GO:0000976,GO:0000977,GO:0000978,GO:0000979,GO:0000981,GO:0001228,GO:0003677,GO:0003682,GO:0019900,GO:0035035,GO:0042802,GO:0042826,GO:0043565,GO:0044389,GO:1990837,GO:0001541,GO:0001892,GO:0006357,GO:0030182,GO:0032496,GO:0032675,GO:0032753,GO:0033598,GO:0034976,GO:0042130,GO:0042742,GO:0043524,GO:0045444,GO:0045600,GO:0045669,GO:0045670,GO:0045892,GO:0045893,GO:0045944,GO:…	regulation of transcription, DNA-templated,DNA-binding transcription factor activity,transcription cis-regulatory region binding,RNA polymerase II transcription regulatory region sequence-specific DNA binding,RNA polymerase II cis-regulatory region sequence-specific DNA binding,RNA polymerase II core promoter sequence-specific DNA binding,DNA-binding transcription factor activity, RNA polymerase …	1.18601	5.25512	6.39936	0.0287945	0.24789	2
ENSCAFG00845024257	CD47	478552	CD47 molecule [Source:NCBI gene (formerly Entrezgene);Acc:478552]	protein_coding	GO:0005887,GO:0050729,GO:0070053,GO:0022409,GO:0050766,GO:0098632,GO:0008284,GO:0032649,GO:0032653,GO:0032655,GO:0032675,GO:0032680,GO:0050870,GO:0071349,GO:1904669,GO:0009986	integral component of plasma membrane,positive regulation of inflammatory response,thrombospondin receptor activity,positive regulation of cell-cell adhesion,positive regulation of phagocytosis,cell-cell adhesion mediator activity,positive regulation of cell population proliferation,regulation of interferon-gamma production,regulation of interleukin-10 production,regulation of interleukin-12 prod…	0.602793	8.37248	6.37654	0.029023	0.248483	2
ENSCAFG00845021493	SLC1A2	403750	solute carrier family 1 member 2 [Source:NCBI gene (formerly Entrezgene);Acc:403750]	protein_coding	GO:0016021,GO:0015293,GO:0005313,GO:0005314,GO:0008509,GO:0015501,GO:0033229,GO:0006750,GO:0007399,GO:0007632,GO:0009410,GO:0009416,GO:0009611,GO:0010259,GO:0015813,GO:0021537,GO:0030534,GO:0031668,GO:0035264,GO:0043200,GO:0046326,GO:0070207,GO:0070779,GO:0071314,GO:0098656,GO:0098712,GO:0098810,GO:0005886,GO:0005887,GO:0009986,GO:0016020,GO:0030424,GO:0030673,GO:0031982,GO:0044297,GO:0044306,GO:…	integral component of membrane,symporter activity,L-glutamate transmembrane transporter activity,high-affinity glutamate transmembrane transporter activity,anion transmembrane transporter activity,glutamate:sodium symporter activity,cysteine transmembrane transporter activity,glutathione biosynthetic process,nervous system development,visual behavior,response to xenobiotic stimulus,response to li…	1.28346	3.62184	6.35733	0.0292171	0.249195	2
ENSCAFG00845021181	AFF2	492193	AF4/FMR2 family member 2 [Source:HGNC Symbol;Acc:HGNC:3776]	protein_coding	GO:0005634,GO:0010468,GO:0016607,GO:0043484,GO:0043484,GO:0005634,GO:0010468,GO:0010629,GO:0007611,GO:0002151,GO:0035063	nucleus,regulation of gene expression,nuclear speck,regulation of RNA splicing,regulation of RNA splicing,nucleus,regulation of gene expression,negative regulation of gene expression,learning or memory,G-quadruplex RNA binding,nuclear speck organization	0.986897	5.21949	6.33596	0.0294347	0.250243	2
ENSCAFG00845000999	POU2F2	484478	POU class 2 homeobox 2 [Source:HGNC Symbol;Acc:HGNC:9213]	protein_coding	GO:0003677,GO:0006355,GO:0005634,GO:0003700,GO:0000981,GO:0032755,GO:0000976,GO:0098586,GO:0045893,GO:0005634,GO:0043565,GO:0003677,GO:0006355,GO:0000978,GO:0001228,GO:0003700,GO:0045944,GO:0019904,GO:0002335,GO:0048469	DNA binding,regulation of transcription, DNA-templated,nucleus,DNA-binding transcription factor activity,DNA-binding transcription factor activity, RNA polymerase II-specific,positive regulation of interleukin-6 production,transcription cis-regulatory region binding,cellular response to virus,positive regulation of transcription, DNA-templated,nucleus,sequence-specific DNA binding,DNA binding,reg…	1.76495	3.27223	6.31258	0.0296752	0.251407	2
ENSCAFG00845006658	EREG	611946	epiregulin [Source:HGNC Symbol;Acc:HGNC:3443]	protein_coding	GO:0005154,GO:0005615,GO:0008285,GO:0008284,GO:0032755,GO:0007267,GO:0045892,GO:0045860,GO:0019221,GO:0048146,GO:0045840,GO:0005154,GO:0045740,GO:0001819,GO:0001819,GO:0045089,GO:0042327,GO:0007173,GO:0009299,GO:0043616,GO:0051151	epidermal growth factor receptor binding,extracellular space,negative regulation of cell population proliferation,positive regulation of cell population proliferation,positive regulation of interleukin-6 production,cell-cell signaling,negative regulation of transcription, DNA-templated,positive regulation of protein kinase activity,cytokine-mediated signaling pathway,positive regulation of fibrob…	2.07717	5.11723	6.29973	0.0298084	0.252113	2
ENSCAFG00845002644	HEATR1	479192	HEAT repeat containing 1 [Source:HGNC Symbol;Acc:HGNC:25517]	protein_coding	GO:0045943,GO:2000234,GO:0001650,GO:0005730,GO:0005739	positive regulation of transcription by RNA polymerase I,positive regulation of rRNA processing,fibrillar center,nucleolus,mitochondrion	0.565616	6.59112	6.26716	0.0301492	0.253723	2
ENSCAFG00845016434	AGFG1	477396	ArfGAP with FG repeats 1 [Source:HGNC Symbol;Acc:HGNC:5175]	protein_coding	GO:0005096,GO:0043231	GTPase activator activity,intracellular membrane-bounded organelle	0.643035	7.23387	6.24498	0.030384	0.254741	2
ENSCAFG00845029978	TOP1	477229	DNA topoisomerase I [Source:HGNC Symbol;Acc:HGNC:11986]	protein_coding	GO:0003677,GO:0003917,GO:0006265,GO:0005694,GO:0005634,GO:0003677,GO:0005730,GO:0005654,GO:0000932,GO:0003917,GO:0006265,GO:0032922,GO:0005737,GO:0006338,GO:0000978,GO:0003682,GO:0019904,GO:0000228,GO:0007623,GO:0001650,GO:0005524,GO:0009410,GO:0006260,GO:0032993,GO:0040016,GO:0004674,GO:0003690,GO:0043204,GO:0003697,GO:0097100,GO:0018105	DNA binding,DNA topoisomerase type I (single strand cut, ATP-independent) activity,DNA topological change,chromosome,nucleus,DNA binding,nucleolus,nucleoplasm,P-body,DNA topoisomerase type I (single strand cut, ATP-independent) activity,DNA topological change,circadian regulation of gene expression,cytoplasm,chromatin remodeling,RNA polymerase II cis-regulatory region sequence-specific DNA bindin…	0.765655	8.18516	6.22331	0.0306155	0.254965	2
ENSCAFG00845015903	PDE1B	100856025	phosphodiesterase 1B [Source:HGNC Symbol;Acc:HGNC:8775]	protein_coding	GO:0007165,GO:0004114,GO:0008081,GO:0004115,GO:0047555,GO:0007626,GO:0008542,GO:0001975,GO:0007165,GO:0097011,GO:0036006,GO:0030224,GO:0042428,GO:0001505,GO:0042053	signal transduction,3',5'-cyclic-nucleotide phosphodiesterase activity,phosphoric diester hydrolase activity,3',5'-cyclic-AMP phosphodiesterase activity,3',5'-cyclic-GMP phosphodiesterase activity,locomotory behavior,visual learning,response to amphetamine,signal transduction,cellular response to granulocyte macrophage colony-stimulating factor stimulus,cellular response to macrophage colony-stim…	2.97263	1.67372	6.2139	0.0307168	0.254965	2
ENSCAFG00845010374	ABCA1	481651	ATP binding cassette subfamily A member 1 [Source:HGNC Symbol;Acc:HGNC:29]	protein_coding	GO:0016021,GO:0005524,GO:0055085,GO:0140359,GO:0005102,GO:0005548,GO:0008320,GO:0019905,GO:0031210,GO:0031267,GO:0034185,GO:0034186,GO:0034188,GO:0046623,GO:0051117,GO:0090554,GO:0090556,GO:0120020,GO:0140328,GO:0002790,GO:0006497,GO:0006911,GO:0007040,GO:0007186,GO:0007189,GO:0008203,GO:0009306,GO:0010875,GO:0016197,GO:0023061,GO:0032367,GO:0032489,GO:0033344,GO:0033700,GO:0034380,GO:0034616,GO:…	integral component of membrane,ATP binding,transmembrane transport,ABC-type transporter activity,signaling receptor binding,phospholipid transporter activity,protein transmembrane transporter activity,syntaxin binding,phosphatidylcholine binding,small GTPase binding,apolipoprotein binding,apolipoprotein A-I binding,apolipoprotein A-I receptor activity,sphingolipid floppase activity,ATPase binding…	1.01716	9.21689	6.18823	0.0309948	0.255936	2
ENSCAFG00845014740	PRSS57	485099	serine protease 57 [Source:HGNC Symbol;Acc:HGNC:31397]	protein_coding	GO:0006508,GO:0004252	proteolysis,serine-type endopeptidase activity	1.61003	0.343124	6.1796	0.031089	0.25638	2
ENSCAFG00845025081	DAPP1	478491	dual adaptor of phosphotyrosine and 3-phosphoinositides 1 [Source:HGNC Symbol;Acc:HGNC:16500]	protein_coding	GO:0005886,GO:0005547,GO:0043325	plasma membrane,phosphatidylinositol-3,4,5-trisphosphate binding,phosphatidylinositol-3,4-bisphosphate binding	1.13844	4.81107	6.16467	0.0312528	0.256918	2
ENSCAFG00845011308	IL1A	403782	interleukin 1 alpha [Source:NCBI gene (formerly Entrezgene);Acc:403782]	protein_coding	GO:0005576,GO:0005125,GO:0006955,GO:0006954,GO:0005615,GO:0005149,GO:0005507,GO:0001819,GO:0002248,GO:0006883,GO:0008285,GO:0010575,GO:0010628,GO:0019221,GO:0032743,GO:0034605,GO:0035234,GO:0045766,GO:0045840,GO:0045944,GO:0046688,GO:0050714,GO:0097192,GO:0005829	extracellular region,cytokine activity,immune response,inflammatory response,extracellular space,interleukin-1 receptor binding,copper ion binding,positive regulation of cytokine production,connective tissue replacement involved in inflammatory response wound healing,cellular sodium ion homeostasis,negative regulation of cell population proliferation,positive regulation of vascular endothelial gr…	3.93131	5.69951	6.14929	0.0314227	0.257756	2
ENSCAFG00845013917	ITGAL	489905	integrin subunit alpha L [Source:HGNC Symbol;Acc:HGNC:6148]	protein_coding	GO:0007155,GO:0008305,GO:0030369,GO:0050839,GO:0002291,GO:0007157,GO:0007159,GO:0007160,GO:0035683,GO:0043113,GO:0009986,GO:0034687	cell adhesion,integrin complex,ICAM-3 receptor activity,cell adhesion molecule binding,T cell activation via T cell receptor contact with antigen bound to MHC molecule on antigen presenting cell,heterophilic cell-cell adhesion via plasma membrane cell adhesion molecules,leukocyte cell-cell adhesion,cell-matrix adhesion,memory T cell extravasation,receptor clustering,cell surface,integrin alphaL-b…	1.33283	6.00009	6.12099	0.0317381	0.258607	2
ENSCAFG00845025852	VMP1	119881609	vacuole membrane protein 1 [Source:HGNC Symbol;Acc:HGNC:29559]	protein_coding	GO:0017128,GO:0000045,GO:0006914,GO:0007566,GO:0016240,GO:0034329,GO:0042953,GO:0098609,GO:0140056,GO:1901896,GO:1990456,GO:0000407,GO:0005730,GO:0005783,GO:0005789	phospholipid scramblase activity,autophagosome assembly,autophagy,embryo implantation,autophagosome membrane docking,cell junction assembly,lipoprotein transport,cell-cell adhesion,organelle localization by membrane tethering,positive regulation of ATPase-coupled calcium transmembrane transporter activity,mitochondrion-endoplasmic reticulum membrane tethering,phagophore assembly site,nucleolus,en…	1.16284	8.78893	6.10839	0.0318797	0.258998	2
ENSCAFG00845001064	DDAH1	490182	dimethylarginine dimethylaminohydrolase 1 [Source:HGNC Symbol;Acc:HGNC:2715]	protein_coding	GO:0016403,GO:0000052,GO:0006527,GO:0045429,GO:0016403,GO:0008285,GO:0003073,GO:0016403,GO:0000052,GO:0006527,GO:0043116,GO:0045429,GO:1900038	dimethylargininase activity,citrulline metabolic process,arginine catabolic process,positive regulation of nitric oxide biosynthetic process,dimethylargininase activity,negative regulation of cell population proliferation,regulation of systemic arterial blood pressure,dimethylargininase activity,citrulline metabolic process,arginine catabolic process,negative regulation of vascular permeability,p…	2.04844	5.62496	6.08477	0.0321473	0.260015	2
ENSCAFG00845013952	RAP1B	608981	RAP1B, member of RAS oncogene family [Source:HGNC Symbol;Acc:HGNC:9857]	protein_coding	GO:0007165,GO:0016020,GO:0005525,GO:0003924,GO:0032486,GO:0019003,GO:0044877,GO:0007264,GO:0008283,GO:0033625,GO:0045955,GO:0061028,GO:0070374,GO:0071320,GO:1901888,GO:2000114,GO:2000301,GO:0005811,GO:0005829,GO:0005911	signal transduction,membrane,GTP binding,GTPase activity,Rap protein signal transduction,GDP binding,protein-containing complex binding,small GTPase mediated signal transduction,cell population proliferation,positive regulation of integrin activation,negative regulation of calcium ion-dependent exocytosis,establishment of endothelial barrier,positive regulation of ERK1 and ERK2 cascade,cellular r…	0.778088	8.0803	6.08397	0.0321564	0.260015	2
ENSCAFG00845022799	NOCT	483818	nocturnin [Source:HGNC Symbol;Acc:HGNC:14254]	protein_coding	GO:0003824,GO:0007623,GO:0004535,GO:0032922,GO:0005737,GO:0005634,GO:0005739,GO:0048471,GO:0004535,GO:0003729,GO:0032922,GO:0010629,GO:0007623,GO:0000932,GO:0032496,GO:0042752,GO:0045668,GO:0045600,GO:0048255,GO:0033962,GO:0045995,GO:0000290,GO:0019178,GO:0102757,GO:0006739,GO:0009991	catalytic activity,circadian rhythm,poly(A)-specific ribonuclease activity,circadian regulation of gene expression,cytoplasm,nucleus,mitochondrion,perinuclear region of cytoplasm,poly(A)-specific ribonuclease activity,mRNA binding,circadian regulation of gene expression,negative regulation of gene expression,circadian rhythm,P-body,response to lipopolysaccharide,regulation of circadian rhythm,neg…	2.69035	7.2557	6.07751	0.0322301	0.260298	2
ENSCAFG00845011205	MICAL1	481958	microtubule associated monooxygenase, calponin and LIM domain containing 1 [Source:HGNC Symbol;Acc:HGNC:20619]	protein_coding	GO:0005515,GO:0005737,GO:0003779,GO:0071949,GO:0016709,GO:0030042,GO:0019417,GO:0005737,GO:0003779,GO:0017124,GO:0030496,GO:0016174,GO:0019901,GO:0043066,GO:0043154,GO:0031267,GO:0001933,GO:0071949,GO:0045171,GO:1990026,GO:0004497,GO:0016709,GO:0019417,GO:0030042,GO:1903305	protein binding,cytoplasm,actin binding,FAD binding,oxidoreductase activity, acting on paired donors, with incorporation or reduction of molecular oxygen, NAD(P)H as one donor, and incorporation of one atom of oxygen,actin filament depolymerization,sulfur oxidation,cytoplasm,actin binding,SH3 domain binding,midbody,NAD(P)H oxidase H2O2-forming activity,protein kinase binding,negative regulation o…	0.756096	3.55181	6.07195	0.0322938	0.2605	2
ENSCAFG00845027439		NA		lncRNA			2.10378	-1.46516	6.05832	0.0324502	0.261063	2
ENSCAFG00845003433	CCL22	100686212	C-C motif chemokine ligand 22 [Source:HGNC Symbol;Acc:HGNC:10621]	protein_coding	GO:0005576,GO:0006955,GO:0006954,GO:0005615,GO:0008009,GO:0060326	extracellular region,immune response,inflammatory response,extracellular space,chemokine activity,cell chemotaxis	3.21864	-0.296185	6.00471	0.0330749	0.262776	2
ENSCAFG00845026900	MAPK6	478311	mitogen-activated protein kinase 6 [Source:HGNC Symbol;Acc:HGNC:6879]	protein_coding	GO:0005524,GO:0006468,GO:0004672,GO:0004707,GO:0005634,GO:0004707,GO:0019901,GO:0005737,GO:0046982,GO:0005829,GO:0032991,GO:0004672,GO:0006468,GO:0060999,GO:0032156	ATP binding,protein phosphorylation,protein kinase activity,MAP kinase activity,nucleus,MAP kinase activity,protein kinase binding,cytoplasm,protein heterodimerization activity,cytosol,protein-containing complex,protein kinase activity,protein phosphorylation,positive regulation of dendritic spine development,septin cytoskeleton	0.955852	5.83716	6.00195	0.0331075	0.262803	2
ENSCAFG00845013929	METTL1	607590	methyltransferase 1, tRNA methylguanosine [Source:HGNC Symbol;Acc:HGNC:7030]	protein_coding	GO:0006400,GO:0008176	tRNA modification,tRNA (guanine-N7-)-methyltransferase activity	1.5656	2.80042	5.98826	0.0332695	0.263092	2
ENSCAFG00845017366	DLA-79	483594	MHC class Ib [Source:NCBI gene (formerly Entrezgene);Acc:483594]	protein_coding			2.08049	5.15794	5.97888	0.0333811	0.263468	2
ENSCAFG00845008744		NA		protein_coding	GO:0005576,GO:0030414,GO:0008047,GO:0032496,GO:0034612,GO:0050872,GO:0005615	extracellular region,peptidase inhibitor activity,enzyme activator activity,response to lipopolysaccharide,response to tumor necrosis factor,white fat cell differentiation,extracellular space	3.58236	3.13289	5.96967	0.033491	0.263734	2
ENSCAFG00845029387	FCER1G	403798	Fc fragment of IgE receptor Ig [Source:NCBI gene (formerly Entrezgene);Acc:403798]	protein_coding	GO:0016020,GO:0007166,GO:0004888,GO:0032998,GO:0019767,GO:0042802,GO:0038095,GO:0005887,GO:0009986	membrane,cell surface receptor signaling pathway,transmembrane signaling receptor activity,Fc-epsilon receptor I complex,IgE receptor activity,identical protein binding,Fc-epsilon receptor signaling pathway,integral component of plasma membrane,cell surface	1.5277	4.54218	5.96242	0.033578	0.263734	2
ENSCAFG00845018106	SYK	484196	spleen associated tyrosine kinase [Source:HGNC Symbol;Acc:HGNC:11491]	protein_coding	GO:0005524,GO:0005737,GO:0006468,GO:0035556,GO:0004672,GO:0004713,GO:0004715,GO:0004715,GO:0031623,GO:0045087,GO:0007229,GO:0042742,GO:0001784,GO:0019901,GO:0005737,GO:0032753,GO:0032009,GO:0030593,GO:0002283,GO:0035556,GO:0005634,GO:0032991,GO:0046777,GO:0018108,GO:0032760,GO:0120162,GO:0043280,GO:0005524,GO:0004674,GO:0005102,GO:0043410,GO:0050731,GO:0045780,GO:0001819,GO:0033630,GO:0007166,GO:…	ATP binding,cytoplasm,protein phosphorylation,intracellular signal transduction,protein kinase activity,protein tyrosine kinase activity,non-membrane spanning protein tyrosine kinase activity,non-membrane spanning protein tyrosine kinase activity,receptor internalization,innate immune response,integrin-mediated signaling pathway,defense response to bacterium,phosphotyrosine residue binding,protei…	1.67896	7.55107	5.96216	0.033581	0.263734	2
ENSCAFG00845017310	COX17	503668	cytochrome c oxidase copper chaperone COX17 [Source:NCBI gene (formerly Entrezgene);Acc:503668]	protein_coding	GO:0005507,GO:0016531,GO:0005758,GO:1903136,GO:0008284,GO:0033617,GO:1904960,GO:0005737	copper ion binding,copper chaperone activity,mitochondrial intermembrane space,cuprous ion binding,positive regulation of cell population proliferation,mitochondrial cytochrome c oxidase assembly,positive regulation of cytochrome-c oxidase activity,cytoplasm	1.44478	2.44405	5.95927	0.0336157	0.263904	2
ENSCAFG00845004191	RABGGTB	612683		protein_coding	GO:0003824,GO:0018344,GO:0004663	catalytic activity,protein geranylgeranylation,Rab geranylgeranyltransferase activity	0.773512	4.77662	5.95492	0.0336681	0.264008	2
ENSCAFG00845004286	IL4R	489957	interleukin 4 receptor [Source:HGNC Symbol;Acc:HGNC:6015]	protein_coding	GO:0016021,GO:0005515,GO:0016020,GO:0004896,GO:0002532,GO:0005886,GO:0005654,GO:0120162,GO:0034451,GO:0042832,GO:0043235,GO:0002639,GO:0016064,GO:0043306,GO:0045626,GO:0045630,GO:1901741,GO:0032722,GO:0043032	integral component of membrane,protein binding,membrane,cytokine receptor activity,production of molecular mediator involved in inflammatory response,plasma membrane,nucleoplasm,positive regulation of cold-induced thermogenesis,centriolar satellite,defense response to protozoan,receptor complex,positive regulation of immunoglobulin production,immunoglobulin mediated immune response,positive regul…	1.11251	5.96118	5.95216	0.0337014	0.264166	2
ENSCAFG00845013886	CYP27B1	481133	cytochrome P450 family 27 subfamily B member 1 [Source:HGNC Symbol;Acc:HGNC:2606]	protein_coding	GO:0004497,GO:0020037,GO:0005506,GO:0016705,GO:0008285,GO:0032496,GO:0006816,GO:0005737,GO:0030308,GO:0030500,GO:0033280,GO:0034341,GO:0030282,GO:0004498,GO:0062185,GO:0010956,GO:0010980,GO:0036378,GO:0042359,GO:0042369,GO:0043627,GO:0045618,GO:0046697,GO:0055074,GO:0070314,GO:0070564	monooxygenase activity,heme binding,iron ion binding,oxidoreductase activity, acting on paired donors, with incorporation or reduction of molecular oxygen,negative regulation of cell population proliferation,response to lipopolysaccharide,calcium ion transport,cytoplasm,negative regulation of cell growth,regulation of bone mineralization,response to vitamin D,response to interferon-gamma,bone min…	3.12713	1.30214	5.94189	0.0338255	0.264319	2
ENSCAFG00845028960		NA		lncRNA			1.82976	6.98829	5.93642	0.0338918	0.264633	2
ENSCAFG00845020975	GIT2	477520	GIT ArfGAP 2 [Source:HGNC Symbol;Acc:HGNC:4273]	protein_coding	GO:0005515,GO:0005096,GO:0005654	protein binding,GTPase activator activity,nucleoplasm	0.575462	7.0531	5.92996	0.0339703	0.264736	2
ENSCAFG00845028286	TNFSF13B	485545	TNF superfamily member 13b [Source:NCBI gene (formerly Entrezgene);Acc:485545]	protein_coding	GO:0005515,GO:0016020,GO:0006955,GO:0005164,GO:0030890,GO:0005737,GO:0005886,GO:0005925,GO:0043231,GO:0048471	protein binding,membrane,immune response,tumor necrosis factor receptor binding,positive regulation of B cell proliferation,cytoplasm,plasma membrane,focal adhesion,intracellular membrane-bounded organelle,perinuclear region of cytoplasm	1.47272	4.3246	5.92778	0.033997	0.264759	2
ENSCAFG00845008434		100885891		miRNA			1.21847	-1.75372	5.91747	0.0341229	0.26503	2
ENSCAFG00845011120	DGAT2	485185	diacylglycerol O-acyltransferase 2 [Source:HGNC Symbol;Acc:HGNC:16940]	protein_coding	GO:0016747,GO:0005789,GO:0005811,GO:0004144,GO:0006651,GO:0005829,GO:0043231,GO:0016020,GO:0042803,GO:0048471,GO:0005739,GO:0016021,GO:0005783,GO:0019432,GO:0042632,GO:0030176,GO:0003846,GO:0006640,GO:0035336,GO:0046339,GO:0019915,GO:0034383,GO:0035356,GO:0055089,GO:0060613,GO:0071400,GO:0097006,GO:1990578	acyltransferase activity, transferring groups other than amino-acyl groups,endoplasmic reticulum membrane,lipid droplet,diacylglycerol O-acyltransferase activity,diacylglycerol biosynthetic process,cytosol,intracellular membrane-bounded organelle,membrane,protein homodimerization activity,perinuclear region of cytoplasm,mitochondrion,integral component of membrane,endoplasmic reticulum,triglyceri…	1.56913	6.71536	5.91431	0.0341616	0.26503	2
ENSCAFG00845018471		608930		protein_coding	GO:0005615,GO:0004867	extracellular space,serine-type endopeptidase inhibitor activity	1.94934	7.00527	5.89653	0.0343804	0.265518	2
ENSCAFG00845003562	GNG2	610817	G protein subunit gamma 2 [Source:HGNC Symbol;Acc:HGNC:4404]	protein_coding	GO:0007186,GO:0031681,GO:0005834	G protein-coupled receptor signaling pathway,G-protein beta-subunit binding,heterotrimeric G-protein complex	1.42144	7.43933	5.89105	0.0344482	0.265797	2
ENSCAFG00845027227	EEF1AKMT4	488105	EEF1A lysine methyltransferase 4 [Source:HGNC Symbol;Acc:HGNC:53611]	protein_coding	GO:0008168,GO:0008168,GO:0016279	methyltransferase activity,methyltransferase activity,protein-lysine N-methyltransferase activity	1.43494	0.443578	5.88895	0.0344741	0.265852	2
ENSCAFG00845001707		NA		lncRNA			2.39219	0.712905	5.85507	0.0348972	0.267579	2
ENSCAFG00845012110	CCRL2	484788	C-C motif chemokine receptor like 2 [Source:HGNC Symbol;Acc:HGNC:1612]	protein_coding	GO:0007186,GO:0016021,GO:0006935,GO:0004930,GO:0004950,GO:0042379,GO:0048020,GO:0005887	G protein-coupled receptor signaling pathway,integral component of membrane,chemotaxis,G protein-coupled receptor activity,chemokine receptor activity,chemokine receptor binding,CCR chemokine receptor binding,integral component of plasma membrane	1.66452	2.58683	5.85214	0.034934	0.267579	2
ENSCAFG00845014578	PGS1	475920	phosphatidylglycerophosphate synthase 1 [Source:HGNC Symbol;Acc:HGNC:30029]	protein_coding	GO:0003824,GO:0008444,GO:0032049,GO:0005783	catalytic activity,CDP-diacylglycerol-glycerol-3-phosphate 3-phosphatidyltransferase activity,cardiolipin biosynthetic process,endoplasmic reticulum	1.58102	6.47018	5.84972	0.0349645	0.267579	2
ENSCAFG00845006581	MARCHF1	612618	membrane associated ring-CH-type finger 1 [Source:HGNC Symbol;Acc:HGNC:26077]	protein_coding	GO:0008270	zinc ion binding	1.0828	7.03678	5.84403	0.0350363	0.267783	2
ENSCAFG00845012142	SH3BP2	488797	SH3 domain binding protein 2 [Source:HGNC Symbol;Acc:HGNC:10825]	protein_coding	GO:0007165,GO:0001784	signal transduction,phosphotyrosine residue binding	1.00349	4.99516	5.83697	0.0351257	0.268061	2
ENSCAFG00845018543	MSRB1	611032	methionine sulfoxide reductase B1 [Source:NCBI gene (formerly Entrezgene);Acc:611032]	protein_coding	GO:0033743,GO:0003779,GO:0008270,GO:0070191,GO:0030041,GO:0030091,GO:0045087,GO:0005634,GO:0005737,GO:0015629	peptide-methionine (R)-S-oxide reductase activity,actin binding,zinc ion binding,methionine-R-sulfoxide reductase activity,actin filament polymerization,protein repair,innate immune response,nucleus,cytoplasm,actin cytoskeleton	1.30516	5.53782	5.82921	0.0352244	0.268504	2
ENSCAFG00845003698		484309		protein_coding			2.1218	5.53662	5.82259	0.0353087	0.268625	2
ENSCAFG00845021970		NA		lncRNA			0.834559	0.944517	5.80866	0.035487	0.269294	2
ENSCAFG00845020299	NABP1	478847	nucleic acid binding protein 1 [Source:HGNC Symbol;Acc:HGNC:26232]	protein_coding	GO:0005634,GO:0006281,GO:0006974,GO:0010212,GO:0000724,GO:0005829,GO:0005654,GO:0003723,GO:0044818,GO:0035861,GO:0070876,GO:0000781,GO:0003697	nucleus,DNA repair,cellular response to DNA damage stimulus,response to ionizing radiation,double-strand break repair via homologous recombination,cytosol,nucleoplasm,RNA binding,mitotic G2/M transition checkpoint,site of double-strand break,SOSS complex,chromosome, telomeric region,single-stranded DNA binding	1.21217	6.28251	5.80376	0.03555	0.26967	2
ENSCAFG00845005230	SF3B3	479659	splicing factor 3b subunit 3 [Source:HGNC Symbol;Acc:HGNC:10770]	protein_coding	GO:0005634,GO:0005515,GO:0003676,GO:0044877,GO:0000398,GO:0042177,GO:0005654,GO:0005689,GO:0005730,GO:0071005,GO:0071013	nucleus,protein binding,nucleic acid binding,protein-containing complex binding,mRNA splicing, via spliceosome,negative regulation of protein catabolic process,nucleoplasm,U12-type spliceosomal complex,nucleolus,U2-type precatalytic spliceosome,catalytic step 2 spliceosome	0.601062	6.61676	5.80042	0.035593	0.269694	2
ENSCAFG00845030320	SLAMF1	403642	signaling lymphocytic activation molecule family member 1 [Source:NCBI gene (formerly Entrezgene);Acc:403642]	protein_coding	GO:0016021,GO:0038023,GO:0046649,GO:0009986,GO:0042169,GO:0042802,GO:0001779,GO:0001787,GO:0002232,GO:0002277,GO:0002725,GO:0010759,GO:0031338,GO:0032689,GO:0032695,GO:0032715,GO:0032720,GO:0032729,GO:0042104,GO:0046330,GO:0050790,GO:0070374,GO:2000349,GO:2000510,GO:2000556,GO:0009897,GO:0045335	integral component of membrane,signaling receptor activity,lymphocyte activation,cell surface,SH2 domain binding,identical protein binding,natural killer cell differentiation,natural killer cell proliferation,leukocyte chemotaxis involved in inflammatory response,myeloid dendritic cell activation involved in immune response,negative regulation of T cell cytokine production,positive regulation of …	1.83172	2.67651	5.79846	0.0356182	0.269759	2
ENSCAFG00845030136	ALDH1A2	478319	aldehyde dehydrogenase 1 family member A2 [Source:NCBI gene (formerly Entrezgene);Acc:478319]	protein_coding	GO:0016491,GO:0016620,GO:0001758,GO:0004028,GO:0001568,GO:0001936,GO:0002138,GO:0003007,GO:0008284,GO:0008285,GO:0009855,GO:0009952,GO:0009954,GO:0010628,GO:0014032,GO:0016331,GO:0021915,GO:0030182,GO:0030324,GO:0030326,GO:0030900,GO:0030902,GO:0031016,GO:0031076,GO:0034097,GO:0035115,GO:0035799,GO:0042573,GO:0042574,GO:0042904,GO:0043010,GO:0043065,GO:0048384,GO:0048566,GO:0048738,GO:0051289,GO:…	oxidoreductase activity,oxidoreductase activity, acting on the aldehyde or oxo group of donors, NAD or NADP as acceptor,retinal dehydrogenase activity,3-chloroallyl aldehyde dehydrogenase activity,blood vessel development,regulation of endothelial cell proliferation,retinoic acid biosynthetic process,heart morphogenesis,positive regulation of cell population proliferation,negative regulation of c…	1.4575	5.39887	5.79591	0.0356512	0.269759	2
ENSCAFG00845000969	IL11	611309	interleukin 11 [Source:HGNC Symbol;Acc:HGNC:5966]	protein_coding	GO:0008083,GO:0008284,GO:0005737,GO:0045944,GO:0033138,GO:0043410,GO:0046888,GO:0050731,GO:0005125,GO:0005142	growth factor activity,positive regulation of cell population proliferation,cytoplasm,positive regulation of transcription by RNA polymerase II,positive regulation of peptidyl-serine phosphorylation,positive regulation of MAPK cascade,negative regulation of hormone secretion,positive regulation of peptidyl-tyrosine phosphorylation,cytokine activity,interleukin-11 receptor binding	3.36829	1.22019	5.78525	0.035789	0.27047	2
ENSCAFG00845015457	GK	480872		protein_coding	GO:0005975,GO:0006072,GO:0016773,GO:0004370,GO:0006071,GO:0019217,GO:0042593	carbohydrate metabolic process,glycerol-3-phosphate metabolic process,phosphotransferase activity, alcohol group as acceptor,glycerol kinase activity,glycerol metabolic process,regulation of fatty acid metabolic process,glucose homeostasis	1.43084	7.86028	5.77422	0.0359325	0.270948	2
ENSCAFG00845029806	CDV3	100685602	CDV3 homolog [Source:HGNC Symbol;Acc:HGNC:26928]	protein_coding	GO:0005829,GO:0005886	cytosol,plasma membrane	0.866346	6.56139	5.77117	0.0359722	0.270948	2
ENSCAFG00845003789	SLC7A5	489667	solute carrier family 7 member 5 [Source:NCBI gene (formerly Entrezgene);Acc:489667]	protein_coding	GO:0016021,GO:0016020,GO:0022857,GO:0055085,GO:0006865,GO:0016021,GO:0005829,GO:0005886,GO:0043231,GO:0010629,GO:0042908,GO:0016324,GO:0089718,GO:0032729,GO:0032740,GO:0032753,GO:0015807,GO:0015171,GO:0015173,GO:0015175,GO:0015179,GO:0015190,GO:0015196,GO:0015349,GO:0015823,GO:0070327,GO:0098713,GO:1903801,GO:1904556,GO:0031528,GO:1990184	integral component of membrane,membrane,transmembrane transporter activity,transmembrane transport,amino acid transport,integral component of membrane,cytosol,plasma membrane,intracellular membrane-bounded organelle,negative regulation of gene expression,xenobiotic transport,apical plasma membrane,amino acid import across plasma membrane,positive regulation of interferon-gamma production,positive…	2.22711	4.53852	5.77081	0.0359769	0.270948	2
ENSCAFG00845018948	RIPK2	477936		protein_coding	GO:0005524,GO:0005737,GO:0042981,GO:0006468,GO:0004674,GO:0004672,GO:0043065,GO:0045087,GO:0002250,GO:0032755,GO:0043065,GO:0042098,GO:0051092,GO:0032760,GO:0071222,GO:0007249,GO:0032874,GO:0043123,GO:0043330,GO:0046330,GO:0050830,GO:0070374,GO:0070431,GO:0071224,GO:1904417,GO:0032729,GO:0031663,GO:0050852,GO:0071223,GO:0032743,GO:0046641,GO:0001961,GO:0002827,GO:0032722,GO:0033091,GO:0034142,GO:…	ATP binding,cytoplasm,regulation of apoptotic process,protein phosphorylation,protein serine/threonine kinase activity,protein kinase activity,positive regulation of apoptotic process,innate immune response,adaptive immune response,positive regulation of interleukin-6 production,positive regulation of apoptotic process,T cell proliferation,positive regulation of NF-kappaB transcription factor act…	0.914532	5.36205	5.76497	0.0360532	0.270948	2
ENSCAFG00845008551	HIVEP3	100684978	HIVEP zinc finger 3 [Source:HGNC Symbol;Acc:HGNC:13561]	protein_coding	GO:0045893,GO:0005634,GO:0003677,GO:0035914	positive regulation of transcription, DNA-templated,nucleus,DNA binding,skeletal muscle cell differentiation	1.78928	6.61329	5.75207	0.0362226	0.271314	2
ENSCAFG00845012779	MEMO1	483029	mediator of cell motility 1 [Source:HGNC Symbol;Acc:HGNC:14014]	protein_coding	GO:0032886	regulation of microtubule-based process	0.692189	7.46312	5.72743	0.0365487	0.272646	2
ENSCAFG00845023141	RPL22L1	488163		protein_coding	GO:0003735,GO:0006412,GO:0005840	structural constituent of ribosome,translation,ribosome	1.25719	3.93339	5.72134	0.0366298	0.272865	2
ENSCAFG00845002083	CORO1A	489949	coronin 1A [Source:HGNC Symbol;Acc:HGNC:2252]	protein_coding	GO:0005515,GO:0051015,GO:0001845,GO:0030595,GO:0005737,GO:0005886,GO:0003779,GO:0006909,GO:0030036,GO:0030027,GO:0042803,GO:0032991,GO:0001891,GO:0005884,GO:0051015,GO:0045335,GO:0032956,GO:0042802,GO:0008022,GO:0006816,GO:0045202,GO:0098978,GO:0005911,GO:0005769,GO:0016477,GO:0030424,GO:0031252,GO:0050870,GO:0042102,GO:0071353,GO:0001772,GO:0043524,GO:0043029,GO:0030335,GO:0008092,GO:0007015,GO:…	protein binding,actin filament binding,phagolysosome assembly,leukocyte chemotaxis,cytoplasm,plasma membrane,actin binding,phagocytosis,actin cytoskeleton organization,lamellipodium,protein homodimerization activity,protein-containing complex,phagocytic cup,actin filament,actin filament binding,phagocytic vesicle,regulation of actin cytoskeleton organization,identical protein binding,protein C-te…	1.47714	5.78998	5.72118	0.036632	0.272865	2
ENSCAFG00845014816		NA		lncRNA			1.80443	3.57467	5.7097	0.0367855	0.273807	2
ENSCAFG00845028635	DCLK1	486009		protein_coding	GO:0006355,GO:0007283,GO:0046983,GO:0048477	regulation of transcription, DNA-templated,spermatogenesis,protein dimerization activity,oogenesis	1.48804	-0.59744	5.70209	0.0368877	0.273963	2
ENSCAFG00845026179	CDKN2D	611216	cyclin dependent kinase inhibitor 2D [Source:HGNC Symbol;Acc:HGNC:1790]	protein_coding	GO:0005515,GO:0004861,GO:0019901,GO:0000079,GO:0000731,GO:0007605,GO:0008285,GO:0009411,GO:0030308,GO:0032526,GO:0033280,GO:0042326,GO:0043154,GO:0048102,GO:1902230,GO:1902807,GO:2000045,GO:0005634,GO:0005654,GO:0005737,GO:0005829,GO:0097129	protein binding,cyclin-dependent protein serine/threonine kinase inhibitor activity,protein kinase binding,regulation of cyclin-dependent protein serine/threonine kinase activity,DNA synthesis involved in DNA repair,sensory perception of sound,negative regulation of cell population proliferation,response to UV,negative regulation of cell growth,response to retinoic acid,response to vitamin D,nega…	1.35345	2.95398	5.68644	0.0370991	0.275129	2
ENSCAFG00845018765	ARMC6	484811	armadillo repeat containing 6 [Source:HGNC Symbol;Acc:HGNC:25049]	protein_coding	GO:0005515,GO:0002244,GO:0005829	protein binding,hematopoietic progenitor cell differentiation,cytosol	0.951798	2.79663	5.68515	0.0371165	0.275157	2
ENSCAFG00845003052	DDX21	476891	DExD-box helicase 21 [Source:HGNC Symbol;Acc:HGNC:2744]	protein_coding	GO:0005524,GO:0003723,GO:0003676,GO:0004386,GO:0003724,GO:0003725,GO:0019843,GO:0030515,GO:0035198,GO:0042802,GO:0097322,GO:0002735,GO:0006366,GO:0009615,GO:0043123,GO:0043330,GO:0062176,GO:0005654,GO:0005694,GO:0005730,GO:0005829	ATP binding,RNA binding,nucleic acid binding,helicase activity,RNA helicase activity,double-stranded RNA binding,rRNA binding,snoRNA binding,miRNA binding,identical protein binding,7SK snRNA binding,positive regulation of myeloid dendritic cell cytokine production,transcription by RNA polymerase II,response to virus,positive regulation of I-kappaB kinase/NF-kappaB signaling,response to exogenous …	1.31995	5.16662	5.67574	0.0372443	0.275802	2
ENSCAFG00845020413	SIN3A	612991	protein tyrosine phosphatase non-receptor type 9 [Source:HGNC Symbol;Acc:HGNC:9661]	protein_coding	GO:0016791,GO:0004725,GO:0006470,GO:0016311,GO:0005737,GO:0004725,GO:0010977,GO:0035335,GO:0044306,GO:1903078	phosphatase activity,protein tyrosine phosphatase activity,protein dephosphorylation,dephosphorylation,cytoplasm,protein tyrosine phosphatase activity,negative regulation of neuron projection development,peptidyl-tyrosine dephosphorylation,neuron projection terminus,positive regulation of protein localization to plasma membrane	0.64028	6.69399	5.66792	0.037351	0.276288	2
ENSCAFG00845016546		NA		protein_coding	GO:0016620	oxidoreductase activity, acting on the aldehyde or oxo group of donors, NAD or NADP as acceptor	1.52128	-1.80553	5.65228	0.0375654	0.277309	2
ENSCAFG00845025601	LPCAT3	486715	lysophosphatidylcholine acyltransferase 3 [Source:HGNC Symbol;Acc:HGNC:30244]	protein_coding	GO:0047184,GO:0106262,GO:0106263,GO:0034378,GO:0034379,GO:0036150,GO:0036151,GO:0036152,GO:0036335,GO:0045540,GO:0045797,GO:0050728,GO:0090158,GO:0097006,GO:1901310,GO:1903573,GO:1905885,GO:0005789	1-acylglycerophosphocholine O-acyltransferase activity,1-acylglycerophosphoethanolamine O-acyltransferase activity,1-acylglycerophosphoserine O-acyltransferase activity,chylomicron assembly,very-low-density lipoprotein particle assembly,phosphatidylserine acyl-chain remodeling,phosphatidylcholine acyl-chain remodeling,phosphatidylethanolamine acyl-chain remodeling,intestinal stem cell homeostasis…	0.562153	5.38634	5.64586	0.0376538	0.277513	2
ENSCAFG00845007235	CAMP	442947	cathelicidin antimicrobial peptide [Source:NCBI gene (formerly Entrezgene);Acc:442947]	protein_coding	GO:0005576,GO:0006952,GO:0042742,GO:0002227,GO:0019731,GO:0045087,GO:0050829,GO:0050830,GO:0051873,GO:0061844,GO:0005615,GO:0042581	extracellular region,defense response,defense response to bacterium,innate immune response in mucosa,antibacterial humoral response,innate immune response,defense response to Gram-negative bacterium,defense response to Gram-positive bacterium,killing by host of symbiont cells,antimicrobial humoral immune response mediated by antimicrobial peptide,extracellular space,specific granule	4.15378	0.685315	5.64368	0.0376839	0.277519	2
ENSCAFG00845029903	GNL3	100685258	G protein nucleolar 3 [Source:HGNC Symbol;Acc:HGNC:29931]	protein_coding	GO:0005525,GO:0048027,GO:0017145,GO:0019827,GO:0032206,GO:0033235,GO:1902895,GO:1904816,GO:0005654,GO:0005694,GO:0005730,GO:0016604,GO:0030496	GTP binding,mRNA 5'-UTR binding,stem cell division,stem cell population maintenance,positive regulation of telomere maintenance,positive regulation of protein sumoylation,positive regulation of pri-miRNA transcription by RNA polymerase II,positive regulation of protein localization to chromosome, telomeric region,nucleoplasm,chromosome,nucleolus,nuclear body,midbody	1.01122	4.04496	5.63584	0.0377923	0.277523	2
ENSCAFG00845024274		NA		lncRNA			1.63992	-2.97439	5.63252	0.0378384	0.27766	2
ENSCAFG00845009878	IKZF1	483231	IKAROS family zinc finger 1 [Source:HGNC Symbol;Acc:HGNC:13176]	protein_coding	GO:0003677,GO:0019904,GO:0030098,GO:0030218,GO:0005634,GO:0005654,GO:0005721,GO:0005829,GO:0032991	DNA binding,protein domain specific binding,lymphocyte differentiation,erythrocyte differentiation,nucleus,nucleoplasm,pericentric heterochromatin,cytosol,protein-containing complex	1.08932	6.21704	5.62742	0.0379093	0.278079	2
ENSCAFG00845003702		490690		protein_coding	GO:0005975,GO:0005737,GO:0003824,GO:0016491,GO:0016616,GO:0019752,GO:0004459	carbohydrate metabolic process,cytoplasm,catalytic activity,oxidoreductase activity,oxidoreductase activity, acting on the CH-OH group of donors, NAD or NADP as acceptor,carboxylic acid metabolic process,L-lactate dehydrogenase activity	1.34519	2.52999	5.61147	0.0381319	0.278903	2
ENSCAFG00845027000	MRPS22,MRPS22	609331,477924	mitochondrial ribosomal protein S22 [Source:HGNC Symbol;Acc:HGNC:14508],mitochondrial ribosomal protein S22 [Source:HGNC Symbol;Acc:HGNC:14508]	protein_coding,protein_coding			0.549512	5.1937	5.59819	0.0383186	0.279561	2
ENSCAFG00845012360	PARVG	481214	parvin gamma [Source:HGNC Symbol;Acc:HGNC:14654]	protein_coding	GO:0005515,GO:0007155,GO:0003779,GO:0031532	protein binding,cell adhesion,actin binding,actin cytoskeleton reorganization	0.935391	4.04726	5.58938	0.0384429	0.280165	2
ENSCAFG00845020171	MAPKAPK3	484756	MAPK activated protein kinase 3 [Source:HGNC Symbol;Acc:HGNC:6888]	protein_coding	GO:0005524,GO:0006468,GO:0004672,GO:0004674,GO:0034097,GO:0005654,GO:0002224,GO:0018105,GO:0032496,GO:0044351	ATP binding,protein phosphorylation,protein kinase activity,protein serine/threonine kinase activity,response to cytokine,nucleoplasm,toll-like receptor signaling pathway,peptidyl-serine phosphorylation,response to lipopolysaccharide,macropinocytosis	1.11348	6.05781	5.5837	0.0385234	0.280502	2
ENSCAFG00845026938	GRB2	483312	growth factor receptor bound protein 2 [Source:HGNC Symbol;Acc:HGNC:4566]	protein_coding	GO:0005515,GO:0005737,GO:0005634,GO:0005768,GO:0017124,GO:0008180,GO:0019903,GO:0031532,GO:0005654,GO:0042802,GO:0005886,GO:0046875,GO:0005730,GO:0019904,GO:0005911,GO:0016020,GO:0030154,GO:0019901,GO:0030838,GO:0048646,GO:0005154,GO:0060670,GO:0001784,GO:0007173,GO:0043408,GO:0031623,GO:0012506,GO:0042770,GO:0071479,GO:2000379,GO:0008286,GO:0030674,GO:0043560,GO:0005168,GO:0070436	protein binding,cytoplasm,nucleus,endosome,SH3 domain binding,COP9 signalosome,protein phosphatase binding,actin cytoskeleton reorganization,nucleoplasm,identical protein binding,plasma membrane,ephrin receptor binding,nucleolus,protein domain specific binding,cell-cell junction,membrane,cell differentiation,protein kinase binding,positive regulation of actin filament polymerization,anatomical st…	0.74483	7.27645	5.57308	0.0386744	0.281143	2
ENSCAFG00845017019	LOXL2	486118	lysyl oxidase like 2 [Source:HGNC Symbol;Acc:HGNC:6666]	protein_coding	GO:0016020,GO:0005507,GO:0005044,GO:0016641,GO:0005634,GO:0005615,GO:0005783,GO:0000122,GO:0005509,GO:0004720,GO:0005507,GO:0018057,GO:0002040,GO:0045892,GO:0001837,GO:0000785,GO:0005654,GO:0043542,GO:0070492,GO:0001935,GO:0006464,GO:0010718,GO:0030199,GO:0046688,GO:0070828	membrane,copper ion binding,scavenger receptor activity,oxidoreductase activity, acting on the CH-NH2 group of donors, oxygen as acceptor,nucleus,extracellular space,endoplasmic reticulum,negative regulation of transcription by RNA polymerase II,calcium ion binding,protein-lysine 6-oxidase activity,copper ion binding,peptidyl-lysine oxidation,sprouting angiogenesis,negative regulation of transcri…	0.970541	4.89318	5.57023	0.0387149	0.281236	2
ENSCAFG00845027592	MIER1	479536	MIER1 transcriptional regulator [Source:HGNC Symbol;Acc:HGNC:29657]	protein_coding	GO:0006355,GO:0017053,GO:0042826,GO:0005634,GO:0042826,GO:0004407,GO:0032991,GO:0017053,GO:0005654,GO:0016575,GO:0031937	regulation of transcription, DNA-templated,transcription repressor complex,histone deacetylase binding,nucleus,histone deacetylase binding,histone deacetylase activity,protein-containing complex,transcription repressor complex,nucleoplasm,histone deacetylation,positive regulation of chromatin silencing	0.592712	7.35376	5.56902	0.0387322	0.28125	2
ENSCAFG00845016469	NOP56	612871	NOP56 ribonucleoprotein [Source:HGNC Symbol;Acc:HGNC:15911]	protein_coding	GO:0001650,GO:1990226,GO:0070761,GO:0030515,GO:0005732	fibrillar center,histone methyltransferase binding,pre-snoRNP complex,snoRNA binding,sno(s)RNA-containing ribonucleoprotein complex	0.794669	4.74199	5.56331	0.0388139	0.281428	2
ENSCAFG00845018509	PTPRJ	483617	protein tyrosine phosphatase receptor type J [Source:HGNC Symbol;Acc:HGNC:9673]	protein_coding	GO:0005515,GO:0016791,GO:0004725,GO:0006470,GO:0016311,GO:0005886,GO:0009986,GO:0004725,GO:0008285,GO:0045785,GO:0019901,GO:0051897,GO:0030308,GO:0043407,GO:0051898,GO:0043116,GO:0010642,GO:0005911,GO:0030336,GO:0051894,GO:0030155,GO:0042059,GO:0008013,GO:0045295,GO:0051019,GO:0035335,GO:0045296,GO:0050918,GO:0001772,GO:0050860,GO:0070097,GO:0016791,GO:0005161,GO:0048008	protein binding,phosphatase activity,protein tyrosine phosphatase activity,protein dephosphorylation,dephosphorylation,plasma membrane,cell surface,protein tyrosine phosphatase activity,negative regulation of cell population proliferation,positive regulation of cell adhesion,protein kinase binding,positive regulation of protein kinase B signaling,negative regulation of cell growth,negative regula…	0.848098	7.24447	5.55621	0.0389157	0.281428	2
ENSCAFG00845029905	PITPNB	609712	phosphatidylinositol transfer protein beta [Source:HGNC Symbol;Acc:HGNC:9002]	protein_coding	GO:0005548,GO:0015914,GO:0006890,GO:0120019,GO:0008526,GO:0031210,GO:0035091,GO:0015914,GO:0008525	phospholipid transporter activity,phospholipid transport,retrograde vesicle-mediated transport, Golgi to endoplasmic reticulum,phosphatidylcholine transfer activity,phosphatidylinositol transfer activity,phosphatidylcholine binding,phosphatidylinositol binding,phospholipid transport,phosphatidylcholine transporter activity	0.789627	7.46556	5.55251	0.0389689	0.281428	2
ENSCAFG00845008662	DNPH1	481810	2'-deoxynucleoside 5'-phosphate N-hydrolase 1 [Source:HGNC Symbol;Acc:HGNC:21218]	protein_coding	GO:0070694,GO:0009159,GO:0005634,GO:0030855,GO:0042802,GO:0070694,GO:0009159	deoxyribonucleoside 5'-monophosphate N-glycosidase activity,deoxyribonucleoside monophosphate catabolic process,nucleus,epithelial cell differentiation,identical protein binding,deoxyribonucleoside 5'-monophosphate N-glycosidase activity,deoxyribonucleoside monophosphate catabolic process	1.46061	0.910994	5.55112	0.0389888	0.281428	2
ENSCAFG00845029952	USF1	488646	upstream transcription factor 1 [Source:HGNC Symbol;Acc:HGNC:12593]	protein_coding	GO:0046983,GO:0005654,GO:0042802,GO:0019899,GO:0045893,GO:1990837,GO:0042826,GO:0043565,GO:0045944,GO:0003677,GO:0003700,GO:0042803,GO:0005634,GO:0000981,GO:0043425,GO:0019901,GO:0005667,GO:0044877,GO:0000785,GO:0001666,GO:0046982,GO:0000432,GO:0055088,GO:0032869,GO:0006357,GO:0009411,GO:0019086	protein dimerization activity,nucleoplasm,identical protein binding,enzyme binding,positive regulation of transcription, DNA-templated,sequence-specific double-stranded DNA binding,histone deacetylase binding,sequence-specific DNA binding,positive regulation of transcription by RNA polymerase II,DNA binding,DNA-binding transcription factor activity,protein homodimerization activity,nucleus,DNA-bi…	0.529342	5.05211	5.53525	0.0392181	0.282144	2
ENSCAFG00845019530		612538		protein_coding	GO:0031419,GO:0015889	cobalamin binding,cobalamin transport	1.73695	0.0700647	5.53477	0.039225	0.282144	2
ENSCAFG00845007348	RAC2	481271	Rac family small GTPase 2 [Source:HGNC Symbol;Acc:HGNC:9802]	protein_coding	GO:0005525,GO:0003924,GO:0019887,GO:0006935,GO:0007015,GO:0007186,GO:0008284,GO:0010592,GO:0010810,GO:0030031,GO:0030036,GO:0042129,GO:0043304,GO:0060263,GO:0060753,GO:0071593,GO:0090023,GO:1902622,GO:0005635,GO:0005737,GO:0005829,GO:0005884,GO:0016020,GO:0030027	GTP binding,GTPase activity,protein kinase regulator activity,chemotaxis,actin filament organization,G protein-coupled receptor signaling pathway,positive regulation of cell population proliferation,positive regulation of lamellipodium assembly,regulation of cell-substrate adhesion,cell projection assembly,actin cytoskeleton organization,regulation of T cell proliferation,regulation of mast cell …	1.25797	4.81471	5.53251	0.0392578	0.282144	2
ENSCAFG00845005378	PTGS2	442942	prostaglandin-endoperoxide synthase 2 [Source:NCBI gene (formerly Entrezgene);Acc:442942]	protein_coding	GO:0006954,GO:0008217,GO:0006979,GO:0020037,GO:0004601,GO:0001516,GO:0004666,GO:0019371,GO:0019899,GO:0042803,GO:0007566,GO:0031394,GO:0031622,GO:0033138,GO:0042127,GO:0043066,GO:0043154,GO:0046697,GO:0050873,GO:0071456,GO:0071471,GO:0071498,GO:0090336,GO:0150077,GO:1902219,GO:0005637,GO:0005640,GO:0005737,GO:0005783,GO:0043005	inflammatory response,regulation of blood pressure,response to oxidative stress,heme binding,peroxidase activity,prostaglandin biosynthetic process,prostaglandin-endoperoxide synthase activity,cyclooxygenase pathway,enzyme binding,protein homodimerization activity,embryo implantation,positive regulation of prostaglandin biosynthetic process,positive regulation of fever generation,positive regulat…	3.9121	6.98823	5.51626	0.0394945	0.283037	2
ENSCAFG00845003069	ZC3H12C	489416	zinc finger CCCH-type containing 12C [Source:HGNC Symbol;Acc:HGNC:29362]	protein_coding	GO:0046872	metal ion binding	0.700355	7.16851	5.5146	0.0395189	0.283111	2
ENSCAFG00845013771	SMOX	485787	spermine oxidase [Source:HGNC Symbol;Acc:HGNC:15862]	protein_coding	GO:0016491,GO:0046592,GO:0006598,GO:0046208,GO:0005654,GO:0005829,GO:0031965,GO:0043231	oxidoreductase activity,polyamine oxidase activity,polyamine catabolic process,spermine catabolic process,nucleoplasm,cytosol,nuclear membrane,intracellular membrane-bounded organelle	0.882482	3.50269	5.50744	0.0396237	0.283361	2
ENSCAFG00845015140	NME1	480558	non-metastatic cells 1, protein (NM23A) expressed in [Source:NCBI gene (formerly Entrezgene);Acc:480558]	protein_coding	GO:0004550,GO:0006165,GO:0006183,GO:0006228,GO:0006241	nucleoside diphosphate kinase activity,nucleoside diphosphate phosphorylation,GTP biosynthetic process,UTP biosynthetic process,CTP biosynthetic process	1.15765	3.73997	5.50479	0.0396627	0.283401	2
ENSCAFG00845027927	GPCPD1	485778	glycerophosphocholine phosphodiesterase 1 [Source:HGNC Symbol;Acc:HGNC:26957]	protein_coding	GO:0030246,GO:0006629,GO:2001070,GO:0008081,GO:0047389,GO:0046475,GO:0007519,GO:0005737	carbohydrate binding,lipid metabolic process,starch binding,phosphoric diester hydrolase activity,glycerophosphocholine phosphodiesterase activity,glycerophospholipid catabolic process,skeletal muscle tissue development,cytoplasm	0.513302	8.01118	5.49773	0.0397665	0.28368	2
ENSCAFG00845013808	RNF24	607703	ring finger protein 24 [Source:HGNC Symbol;Acc:HGNC:13779]	protein_coding	GO:0008270,GO:0005794	zinc ion binding,Golgi apparatus	0.652329	7.07327	5.49632	0.0397874	0.283729	2
ENSCAFG00845016105		NA		protein_coding			1.18166	4.08725	5.49238	0.0398455	0.283943	2
ENSCAFG00845002159		487141		protein_coding	GO:0042010,GO:0035723	interleukin-15 receptor activity,interleukin-15-mediated signaling pathway	0.875894	3.96536	5.48184	0.0400017	0.284245	2
ENSCAFG00845014208	HAUS6	100856608	HAUS augmin like complex subunit 6 [Source:HGNC Symbol;Acc:HGNC:25948]	protein_coding	GO:0051225,GO:0070652,GO:0007098,GO:0005813,GO:0005829,GO:0016607,GO:0034451,GO:1990498	spindle assembly,HAUS complex,centrosome cycle,centrosome,cytosol,nuclear speck,centriolar satellite,mitotic spindle microtubule	0.583645	5.39093	5.47415	0.0401161	0.284357	2
ENSCAFG00845013096	ARL5B	100856369	ADP ribosylation factor like GTPase 5B [Source:HGNC Symbol;Acc:HGNC:23052]	protein_coding	GO:0005525,GO:0003924,GO:1903292	GTP binding,GTPase activity,protein localization to Golgi membrane	1.13126	7.21617	5.4655	0.0402452	0.284586	2
ENSCAFG00845028743	NOP2	611645	NOP2 nucleolar protein [Source:HGNC Symbol;Acc:HGNC:7867]	protein_coding	GO:0003723,GO:0006396,GO:0008168,GO:0008757,GO:0001510,GO:0008284,GO:0005730,GO:1901796,GO:0000027	RNA binding,RNA processing,methyltransferase activity,S-adenosylmethionine-dependent methyltransferase activity,RNA methylation,positive regulation of cell population proliferation,nucleolus,regulation of signal transduction by p53 class mediator,ribosomal large subunit assembly	1.30484	3.28033	5.46417	0.0402651	0.284599	2
ENSCAFG00845015271	TREML2	481791	triggering receptor expressed on myeloid cells like 2 [Source:HGNC Symbol;Acc:HGNC:21092]	protein_coding	GO:0009986,GO:0038023,GO:0042110	cell surface,signaling receptor activity,T cell activation	1.59748	2.2793	5.43919	0.0406411	0.286217	2
ENSCAFG00845017579		NA		protein_coding	GO:0008199,GO:0006826,GO:0006879	ferric iron binding,iron ion transport,cellular iron ion homeostasis	0.922718	1.90038	5.43702	0.040674	0.286317	2
ENSCAFG00845030821		NA		protein_coding			1.28159	-1.64456	5.42112	0.0409158	0.287255	2
ENSCAFG00845028589	TMEM40	100684197	transmembrane protein 40 [Source:HGNC Symbol;Acc:HGNC:25620]	protein_coding			1.45119	0.232549	5.42079	0.0409208	0.287255	2
ENSCAFG00845010877	IL1R2	481330	interleukin 1 receptor type 2 [Source:HGNC Symbol;Acc:HGNC:5994]	protein_coding	GO:0004908,GO:0004910,GO:0005737,GO:1900016,GO:0010955,GO:0032690,GO:2000660,GO:0004908,GO:0019966	interleukin-1 receptor activity,interleukin-1, type II, blocking receptor activity,cytoplasm,negative regulation of cytokine production involved in inflammatory response,negative regulation of protein processing,negative regulation of interleukin-1 alpha production,negative regulation of interleukin-1-mediated signaling pathway,interleukin-1 receptor activity,interleukin-1 binding	3.67814	6.94248	5.4171	0.0409771	0.287287	2
ENSCAFG00845004189		479238		protein_coding	GO:0000287,GO:0005737,GO:0004427,GO:0006796	magnesium ion binding,cytoplasm,inorganic diphosphatase activity,phosphate-containing compound metabolic process	1.07127	6.59104	5.4099	0.0410874	0.287311	2
ENSCAFG00845001359	IL20	609203	interleukin 20 [Source:HGNC Symbol;Acc:HGNC:6002]	protein_coding	GO:0005125,GO:0045517,GO:0045518,GO:0045672,GO:0005615	cytokine activity,interleukin-20 receptor binding,interleukin-22 receptor binding,positive regulation of osteoclast differentiation,extracellular space	3.69302	-0.431622	5.3832	0.0414995	0.288789	2
ENSCAFG00845002673	LPIN2	607640	lipin 2 [Source:HGNC Symbol;Acc:HGNC:14450]	protein_coding			0.547929	7.05639	5.38209	0.0415167	0.288789	2
ENSCAFG00845005138	TUT7	476301	terminal uridylyl transferase 7 [Source:HGNC Symbol;Acc:HGNC:25817]	protein_coding	GO:0008270,GO:0003676,GO:0035198,GO:0050265,GO:0070569,GO:0010526,GO:0010586,GO:0031054,GO:0031123,GO:0071076,GO:0005654,GO:0005737,GO:0005829	zinc ion binding,nucleic acid binding,miRNA binding,RNA uridylyltransferase activity,uridylyltransferase activity,negative regulation of transposition, RNA-mediated,miRNA metabolic process,pre-miRNA processing,RNA 3'-end processing,RNA 3' uridylation,nucleoplasm,cytoplasm,cytosol	0.598725	7.32987	5.36741	0.0417455	0.289145	2
ENSCAFG00845021841	NOC3L	100856584	NOC3 like DNA replication regulator [Source:HGNC Symbol;Acc:HGNC:24034]	protein_coding	GO:0045444,GO:0005654,GO:0005730,GO:0005739,GO:0016607	fat cell differentiation,nucleoplasm,nucleolus,mitochondrion,nuclear speck	0.636838	4.75522	5.36711	0.0417502	0.289145	2
ENSCAFG00845000474		612424		protein_coding			4.23798	2.6281	5.36455	0.0417903	0.289145	2
ENSCAFG00845008176	FNDC7	490129	fibronectin type III domain containing 7 [Source:HGNC Symbol;Acc:HGNC:26668]	protein_coding	GO:0005515	protein binding	1.5209	-0.566872	5.36104	0.0418453	0.289356	2
ENSCAFG00845014216		NA		lncRNA			1.48964	3.49377	5.35987	0.0418638	0.289356	2
ENSCAFG00845003749	ATF3	612911	activating transcription factor 3 [Source:HGNC Symbol;Acc:HGNC:785]	protein_coding	GO:0003677,GO:0006355,GO:0005634,GO:0003700,GO:0006357,GO:0000976,GO:0000977,GO:0000978,GO:0001227,GO:0001228,GO:0042802,GO:0042803,GO:0046982,GO:1990837,GO:0000122,GO:0006094,GO:0010628,GO:0030968,GO:0034198,GO:0035914,GO:0045892,GO:0045944,GO:0070373,GO:1903984,GO:1990440,GO:0005654,GO:0005730,GO:1990622	DNA binding,regulation of transcription, DNA-templated,nucleus,DNA-binding transcription factor activity,regulation of transcription by RNA polymerase II,transcription cis-regulatory region binding,RNA polymerase II transcription regulatory region sequence-specific DNA binding,RNA polymerase II cis-regulatory region sequence-specific DNA binding,DNA-binding transcription repressor activity, RNA p…	1.06717	5.27806	5.34876	0.0420385	0.290167	2
ENSCAFG00845029606	TANK	608092	TRAF family member associated NFKB activator [Source:HGNC Symbol;Acc:HGNC:11562]	protein_coding	GO:0007249,GO:0006974,GO:0004843,GO:0071356,GO:0071347,GO:0032991,GO:0071479,GO:0005829,GO:0031625,GO:0043124,GO:0007249,GO:0035800,GO:1903003,GO:2000158	I-kappaB kinase/NF-kappaB signaling,cellular response to DNA damage stimulus,thiol-dependent deubiquitinase,cellular response to tumor necrosis factor,cellular response to interleukin-1,protein-containing complex,cellular response to ionizing radiation,cytosol,ubiquitin protein ligase binding,negative regulation of I-kappaB kinase/NF-kappaB signaling,I-kappaB kinase/NF-kappaB signaling,deubiquiti…	0.978727	8.03943	5.33773	0.0422129	0.290578	2
ENSCAFG00845014770	PAG1	610895	phosphoprotein membrane anchor with glycosphingolipid microdomains 1 [Source:HGNC Symbol;Acc:HGNC:30043]	protein_coding	GO:0005886,GO:0035556,GO:0045121,GO:0050868,GO:0042169,GO:0050863	plasma membrane,intracellular signal transduction,membrane raft,negative regulation of T cell activation,SH2 domain binding,regulation of T cell activation	1.12145	7.81155	5.33052	0.0423275	0.290928	2
ENSCAFG00845003275		488725		protein_coding	GO:0005515,GO:0016567,GO:0006446,GO:0031463	protein binding,protein ubiquitination,regulation of translational initiation,Cul3-RING ubiquitin ligase complex	1.24149	6.23312	5.33001	0.0423356	0.290928	2
ENSCAFG00845010157	KCNH4	607649	potassium voltage-gated channel subfamily H member 4 [Source:HGNC Symbol;Acc:HGNC:6253]	protein_coding	GO:0016020,GO:0006811,GO:0055085,GO:0005249,GO:0006813,GO:0005216	membrane,ion transport,transmembrane transport,voltage-gated potassium channel activity,potassium ion transport,ion channel activity	1.59319	0.0960456	5.32339	0.0424409	0.290984	2
ENSCAFG00845023356	ARL17A	480487		protein_coding	GO:0005525,GO:0003924,GO:0005794	GTP binding,GTPase activity,Golgi apparatus	0.868115	4.64448	5.32211	0.0424614	0.290984	2
ENSCAFG00845008268	ATP6V1C1	475061	ATPase H+ transporting V1 subunit C1 [Source:HGNC Symbol;Acc:HGNC:856]	protein_coding	GO:0015078,GO:1902600,GO:0033180,GO:0046961,GO:0005886	proton transmembrane transporter activity,proton transmembrane transport,proton-transporting V-type ATPase, V1 domain,proton-transporting ATPase activity, rotational mechanism,plasma membrane	0.593722	6.02618	5.32209	0.0424618	0.290984	2
ENSCAFG00845001231	VASH2	608015	vasohibin 2 [Source:HGNC Symbol;Acc:HGNC:25723]	protein_coding	GO:0005737,GO:0045765,GO:0003779,GO:0006508,GO:0004181,GO:0008017,GO:0005737,GO:0060711,GO:0000768,GO:0001938,GO:0045766,GO:0045766,GO:0060674,GO:0060716,GO:0140253,GO:0061564	cytoplasm,regulation of angiogenesis,actin binding,proteolysis,metallocarboxypeptidase activity,microtubule binding,cytoplasm,labyrinthine layer development,syncytium formation by plasma membrane fusion,positive regulation of endothelial cell proliferation,positive regulation of angiogenesis,positive regulation of angiogenesis,placenta blood vessel development,labyrinthine layer blood vessel deve…	2.18557	4.89648	5.29735	0.042859	0.292398	2
ENSCAFG00845030471	RAB8A,RAB8A	609879,403773	RAB8A, member RAS onco family [Source:NCBI gene (formerly Entrezgene);Acc:403773],RAB8A, member RAS onco family [Source:NCBI gene (formerly Entrezgene);Acc:403773]	protein_coding,protein_coding	GO:0005525,GO:0003924	GTP binding,GTPase activity	0.642944	8.26644	5.29683	0.0428675	0.292398	2
ENSCAFG00845015226	KPNB1	491042		protein_coding	GO:0005515,GO:0006886,GO:0006606,GO:0031267,GO:0051879,GO:0061608,GO:0061676,GO:0006610,GO:0010494,GO:0032991	protein binding,intracellular protein transport,protein import into nucleus,small GTPase binding,Hsp90 protein binding,nuclear import signal receptor activity,importin-alpha family protein binding,ribosomal protein import into nucleus,cytoplasmic stress granule,protein-containing complex	0.618472	6.5171	5.28244	0.0431006	0.292705	2
ENSCAFG00845017007	PLA1A	100686158	phospholipase A1 member A [Source:HGNC Symbol;Acc:HGNC:17661]	protein_coding	GO:0004806,GO:0006629,GO:0052689,GO:0008970,GO:0002080	triglyceride lipase activity,lipid metabolic process,carboxylic ester hydrolase activity,phospholipase A1 activity,acrosomal membrane	1.005	5.14145	5.27582	0.0432084	0.292918	2
ENSCAFG00845022999	UNC13D	483319	unc-13 homolog D [Source:HGNC Symbol;Acc:HGNC:23147]	protein_coding	GO:0031267,GO:0002432,GO:0002467,GO:0006909,GO:0043304,GO:0043320,GO:0045921,GO:0051607,GO:1900026,GO:1903307,GO:0005764,GO:0005829,GO:0033093,GO:0043231,GO:0070382	small GTPase binding,granuloma formation,germinal center formation,phagocytosis,regulation of mast cell degranulation,natural killer cell degranulation,positive regulation of exocytosis,defense response to virus,positive regulation of substrate adhesion-dependent cell spreading,positive regulation of regulated secretory pathway,lysosome,cytosol,Weibel-Palade body,intracellular membrane-bounded or…	0.677979	3.86341	5.27288	0.0432565	0.293009	2
ENSCAFG00845002591	IQGAP1	479050	IQ motif containing GTPase activating protein 1 [Source:HGNC Symbol;Acc:HGNC:6110]	protein_coding	GO:0005515,GO:0007165,GO:0043087,GO:0005078,GO:0005509,GO:0005516,GO:0005547,GO:0019901,GO:0019903,GO:0019904,GO:0031267,GO:0043539,GO:0044548,GO:0060090,GO:0001817,GO:0007173,GO:0007346,GO:0008543,GO:0010761,GO:0016477,GO:0035305,GO:0036120,GO:0043410,GO:0044344,GO:0045860,GO:0048008,GO:0071277,GO:0071364,GO:1990138,GO:0001726,GO:0005634,GO:0005737,GO:0005874,GO:0005886,GO:0005911,GO:0005925,GO:…	protein binding,signal transduction,regulation of GTPase activity,MAP-kinase scaffold activity,calcium ion binding,calmodulin binding,phosphatidylinositol-3,4,5-trisphosphate binding,protein kinase binding,protein phosphatase binding,protein domain specific binding,small GTPase binding,protein serine/threonine kinase activator activity,S100 protein binding,molecular adaptor activity,regulation of…	0.743488	9.45855	5.27051	0.0432951	0.293009	2
ENSCAFG00845029168	ETS2	487761	ETS proto-oncogene 2, transcription factor [Source:HGNC Symbol;Acc:HGNC:3489]	protein_coding	GO:0006355,GO:0003700,GO:0043565,GO:0019904,GO:0005829,GO:0005886,GO:0005654,GO:1990837,GO:0043565,GO:0061629,GO:0045944,GO:0000978,GO:0001227,GO:0000122,GO:0000977,GO:0007498,GO:0001712,GO:0090009	regulation of transcription, DNA-templated,DNA-binding transcription factor activity,sequence-specific DNA binding,protein domain specific binding,cytosol,plasma membrane,nucleoplasm,sequence-specific double-stranded DNA binding,sequence-specific DNA binding,RNA polymerase II-specific DNA-binding transcription factor binding,positive regulation of transcription by RNA polymerase II,RNA polymerase…	1.14713	7.00516	5.26833	0.0433307	0.293009	2
ENSCAFG00845019240		NA		protein_coding			2.0886	-3.29808	5.26519	0.0433822	0.293239	2
ENSCAFG00845022596	SULF2	477254	sulfatase 2 [Source:NCBI gene (formerly Entrezgene);Acc:477254]	protein_coding	GO:0003824,GO:0005509,GO:0005794,GO:0005783,GO:0008484,GO:0009986,GO:0008449,GO:0001822,GO:0002063,GO:0003094,GO:0009611,GO:0010575,GO:0014846,GO:0030201,GO:0032836,GO:0035860,GO:0040037,GO:0048706,GO:0051216,GO:0060348,GO:0060384,GO:0090263,GO:0097421,GO:2000345,GO:0005886	catalytic activity,calcium ion binding,Golgi apparatus,endoplasmic reticulum,sulfuric ester hydrolase activity,cell surface,N-acetylglucosamine-6-sulfatase activity,kidney development,chondrocyte development,glomerular filtration,response to wounding,positive regulation of vascular endothelial growth factor production,esophagus smooth muscle contraction,heparan sulfate proteoglycan metabolic proc…	0.614167	5.06006	5.25664	0.0435226	0.293894	2
ENSCAFG00845011038	TBK1	481145	TANK binding kinase 1 [Source:HGNC Symbol;Acc:HGNC:11584]	protein_coding	GO:0005524,GO:0006468,GO:0004672,GO:0003676,GO:0004674,GO:0019903,GO:0042802,GO:0051219,GO:0002218,GO:0010468,GO:0010629,GO:0016239,GO:0018105,GO:0018107,GO:0031323,GO:0032479,GO:0032727,GO:0032728,GO:0043123,GO:0044565,GO:0045087,GO:0045944,GO:0050830,GO:0060340,GO:1904417,GO:0005654,GO:0005737,GO:0043231	ATP binding,protein phosphorylation,protein kinase activity,nucleic acid binding,protein serine/threonine kinase activity,protein phosphatase binding,identical protein binding,phosphoprotein binding,activation of innate immune response,regulation of gene expression,negative regulation of gene expression,positive regulation of macroautophagy,peptidyl-serine phosphorylation,peptidyl-threonine phosp…	0.489949	6.14887	5.25277	0.0435864	0.294112	2
ENSCAFG00845009549	GIMAP6	482796	GTPase, IMAP family member 6 [Source:HGNC Symbol;Acc:HGNC:21918]	protein_coding	GO:0005525,GO:0005829	GTP binding,cytosol	1.40248	4.08352	5.24703	0.043681	0.294161	2
ENSCAFG00845013447		490143		protein_coding	GO:0016021,GO:0022857,GO:0055085	integral component of membrane,transmembrane transporter activity,transmembrane transport	0.465054	6.41606	5.23124	0.043943	0.2955	2
ENSCAFG00845009569	GIMAP2	482797	GTPase, IMAP family member 2 [Source:HGNC Symbol;Acc:HGNC:21789]	protein_coding	GO:0005525,GO:0005811,GO:0042802	GTP binding,lipid droplet,identical protein binding	1.65666	2.23126	5.2308	0.0439503	0.2955	2
ENSCAFG00845001701		NA		lncRNA			2.2613	-1.14089	5.22726	0.0440093	0.295767	2
ENSCAFG00845022184	TCERG1	478052	transcription elongation regulator 1 [Source:HGNC Symbol;Acc:HGNC:15630]	protein_coding	GO:0005515,GO:0070064	protein binding,proline-rich region binding	0.592259	6.85943	5.20553	0.0443736	0.297161	2
ENSCAFG00845020773	MAST2	482513	microtubule associated serine/threonine kinase 2 [Source:HGNC Symbol;Acc:HGNC:19035]	protein_coding	GO:0005524,GO:0005515,GO:0000287,GO:0006468,GO:0004674,GO:0004672,GO:0032655,GO:0019902	ATP binding,protein binding,magnesium ion binding,protein phosphorylation,protein serine/threonine kinase activity,protein kinase activity,regulation of interleukin-12 production,phosphatase binding	0.685293	5.8859	5.19732	0.0445121	0.297521	2
ENSCAFG00845016302		NA		lncRNA			1.45373	4.68627	5.18111	0.0447873	0.298139	2
ENSCAFG00845010834	PRPF40A	119864507	pre-mRNA processing factor 40 homolog A [Source:HGNC Symbol;Acc:HGNC:16463]	protein_coding	GO:0005515,GO:0045292	protein binding,mRNA cis splicing, via spliceosome	0.58486	6.73662	5.15617	0.0452147	0.299619	2
ENSCAFG00845009230	TECPR1	489868	tectonin beta-propeller repeat containing 1 [Source:HGNC Symbol;Acc:HGNC:22214]	protein_coding	GO:0016021,GO:0006914,GO:0005765,GO:0000421,GO:0005654,GO:0043231,GO:0032266,GO:0097352	integral component of membrane,autophagy,lysosomal membrane,autophagosome membrane,nucleoplasm,intracellular membrane-bounded organelle,phosphatidylinositol-3-phosphate binding,autophagosome maturation	0.800148	4.62362	5.1499	0.0453229	0.30014	2
ENSCAFG00845028939	MYO9B	484844	myosin IXB [Source:HGNC Symbol;Acc:HGNC:7609]	protein_coding	GO:0005524,GO:0005515,GO:0007165,GO:0005096,GO:0007266,GO:0035556,GO:0003774,GO:0016459,GO:0000146,GO:0030048	ATP binding,protein binding,signal transduction,GTPase activator activity,Rho protein signal transduction,intracellular signal transduction,motor activity,myosin complex,microfilament motor activity,actin filament-based movement	0.750381	7.43452	5.13828	0.0455243	0.300911	2
ENSCAFG00845015474	TBL1XR1	488176	TBL1X receptor 1 [Source:HGNC Symbol;Acc:HGNC:29529]	protein_coding	GO:0005515,GO:0000976,GO:0003714,GO:0008013,GO:0042393,GO:0047485,GO:0000122,GO:0045893,GO:0045944,GO:0090263,GO:0000118,GO:0005634,GO:0017053,GO:0072686	protein binding,transcription cis-regulatory region binding,transcription corepressor activity,beta-catenin binding,histone binding,protein N-terminus binding,negative regulation of transcription by RNA polymerase II,positive regulation of transcription, DNA-templated,positive regulation of transcription by RNA polymerase II,positive regulation of canonical Wnt signaling pathway,histone deacetyla…	0.66472	9.40486	5.11509	0.0459296	0.301885	2
ENSCAFG00845006976		NA		protein_coding	GO:0016491,GO:0016616,GO:0019752	oxidoreductase activity,oxidoreductase activity, acting on the CH-OH group of donors, NAD or NADP as acceptor,carboxylic acid metabolic process	1.33149	0.551689	5.09327	0.0463149	0.303432	2
ENSCAFG00845000499	IL7R	612582	interleukin 7 receptor [Source:HGNC Symbol;Acc:HGNC:6024]	protein_coding	GO:0005515,GO:0016020,GO:0004896,GO:0008284,GO:0004896,GO:0048535,GO:0005829,GO:0005886,GO:0005654,GO:0000902,GO:0001915,GO:0008361,GO:0010628,GO:0030217,GO:0033089,GO:0042100,GO:0048872,GO:0070233,GO:0050830,GO:1904894,GO:0009897	protein binding,membrane,cytokine receptor activity,positive regulation of cell population proliferation,cytokine receptor activity,lymph node development,cytosol,plasma membrane,nucleoplasm,cell morphogenesis,negative regulation of T cell mediated cytotoxicity,regulation of cell size,positive regulation of gene expression,T cell differentiation,positive regulation of T cell differentiation in th…	2.08119	4.56396	5.08887	0.0463931	0.303664	2
ENSCAFG00845025903	MED12L	100683791	mediator complex subunit 12L [Source:HGNC Symbol;Acc:HGNC:16050]	protein_coding	GO:0006357,GO:0003712,GO:0016592,GO:0008013	regulation of transcription by RNA polymerase II,transcription coregulator activity,mediator complex,beta-catenin binding	0.999769	6.51382	5.08062	0.0465401	0.303777	2
ENSCAFG00845000652		NA		protein_coding			0.926237	9.57952	5.07645	0.0466145	0.303913	2
ENSCAFG00845000321	GTPBP4	478021	GTP binding protein 4 [Source:HGNC Symbol;Acc:HGNC:21535]	protein_coding	GO:0005525,GO:0005829,GO:0005654,GO:0031965,GO:0005634,GO:0005730,GO:0000463,GO:0003924,GO:0005525,GO:0000079,GO:0008156,GO:0008285,GO:0022408,GO:0030336,GO:0031397,GO:0033342,GO:0050821,GO:0005737,GO:0048471	GTP binding,cytosol,nucleoplasm,nuclear membrane,nucleus,nucleolus,maturation of LSU-rRNA from tricistronic rRNA transcript (SSU-rRNA, 5.8S rRNA, LSU-rRNA),GTPase activity,GTP binding,regulation of cyclin-dependent protein serine/threonine kinase activity,negative regulation of DNA replication,negative regulation of cell population proliferation,negative regulation of cell-cell adhesion,negative …	1.1973	4.48306	5.06798	0.0467664	0.304034	2
ENSCAFG00845030812	FHIP2A	486899	FHF complex subunit HOOK interacting protein 2A [Source:HGNC Symbol;Acc:HGNC:29320]	protein_coding			0.502121	6.28939	5.06054	0.0469003	0.304408	2
ENSCAFG00845014735	DLST	100856446	dihydrolipoamide S-succinyltransferase [Source:HGNC Symbol;Acc:HGNC:2911]	protein_coding	GO:0016746,GO:0006099,GO:0004149,GO:0045252,GO:0106077,GO:0005634,GO:0005654,GO:0005739,GO:0005829,GO:0034451	acyltransferase activity,tricarboxylic acid cycle,dihydrolipoyllysine-residue succinyltransferase activity,oxoglutarate dehydrogenase complex,histone succinylation,nucleus,nucleoplasm,mitochondrion,cytosol,centriolar satellite	0.969797	5.99251	5.0549	0.0470021	0.304775	2
ENSCAFG00845013738	GLRX	609246	glutaredoxin [Source:HGNC Symbol;Acc:HGNC:4330]	protein_coding	GO:0004362,GO:0097573,GO:0047485,GO:0045838,GO:2000651,GO:0005634,GO:0005737	glutathione-disulfide reductase (NADPH) activity,glutathione oxidoreductase activity,protein N-terminus binding,positive regulation of membrane potential,positive regulation of sodium ion transmembrane transporter activity,nucleus,cytoplasm	1.82164	6.3718	5.05296	0.0470371	0.304905	2
ENSCAFG00845001785	CD53	100855953	CD53 molecule [Source:HGNC Symbol;Acc:HGNC:1686]	protein_coding	GO:0016021,GO:0042802,GO:1901741,GO:0001772,GO:0005886,GO:0005911	integral component of membrane,identical protein binding,positive regulation of myoblast fusion,immunological synapse,plasma membrane,cell-cell junction	1.50566	5.06388	5.03018	0.0474515	0.305927	2
ENSCAFG00845017611	AANAT	483331	aralkylamine N-acetyltransferase [Source:HGNC Symbol;Acc:HGNC:19]	protein_coding	GO:0008080,GO:0048471,GO:0071320,GO:0005829,GO:0007623,GO:0006474,GO:0004059,GO:0004060,GO:0030187	N-acetyltransferase activity,perinuclear region of cytoplasm,cellular response to cAMP,cytosol,circadian rhythm,N-terminal protein amino acid acetylation,aralkylamine N-acetyltransferase activity,arylamine N-acetyltransferase activity,melatonin biosynthetic process	1.21179	-0.227474	5.02337	0.0475761	0.306533	2
ENSCAFG00845015591		NA		protein_coding	GO:0005515	protein binding	1.04062	4.38371	5.02246	0.0475927	0.306542	2
ENSCAFG00845022142	RNASEH2B	607281	ribonuclease H2 subunit B [Source:HGNC Symbol;Acc:HGNC:25671]	protein_coding	GO:0032299,GO:0005654,GO:0001701,GO:0010629,GO:0006401,GO:0048146,GO:0009259,GO:0010389,GO:2000001,GO:0032299	ribonuclease H2 complex,nucleoplasm,in utero embryonic development,negative regulation of gene expression,RNA catabolic process,positive regulation of fibroblast proliferation,ribonucleotide metabolic process,regulation of G2/M transition of mitotic cell cycle,regulation of DNA damage checkpoint,ribonuclease H2 complex	0.60553	5.56727	5.01543	0.0477219	0.306886	2
ENSCAFG00845010733		482806		protein_coding	GO:0005524	ATP binding	0.797572	4.57224	5.0116	0.0477926	0.307023	2
ENSCAFG00845031013	SASH3	492125	SAM and SH3 domain containing 3 [Source:HGNC Symbol;Acc:HGNC:15975]	protein_coding	GO:0005515,GO:0002639,GO:0002726,GO:0002821,GO:0030890,GO:0032729,GO:0032733,GO:0032743,GO:0032753,GO:0032760,GO:0042102,GO:0043372,GO:0046622,GO:0048873,GO:0051251,GO:0005634,GO:0005737	protein binding,positive regulation of immunoglobulin production,positive regulation of T cell cytokine production,positive regulation of adaptive immune response,positive regulation of B cell proliferation,positive regulation of interferon-gamma production,positive regulation of interleukin-10 production,positive regulation of interleukin-2 production,positive regulation of interleukin-4 product…	1.13047	4.81603	5.0053	0.0479088	0.307189	2
ENSCAFG00845021334	NOL6	481582	nucleolar protein 6 [Source:HGNC Symbol;Acc:HGNC:19910]	protein_coding	GO:0000794,GO:0005654,GO:0005730,GO:0005739	condensed nuclear chromosome,nucleoplasm,nucleolus,mitochondrion	1.21639	3.56902	5.00126	0.0479838	0.307311	2
ENSCAFG00845002671		476484		protein_coding	GO:1903575	cornified envelope assembly	2.73405	-0.0725252	5.00008	0.0480055	0.307342	2
ENSCAFG00845013354		NA		protein_coding	GO:0004298,GO:0051603,GO:0005839	threonine-type endopeptidase activity,proteolysis involved in cellular protein catabolic process,proteasome core complex	1.57856	-2.39043	4.99224	0.0481513	0.307563	2
ENSCAFG00845021270	ELL,ELL	484820,476667	elongation factor for RNA polymerase II [Source:HGNC Symbol;Acc:HGNC:23114],elongation factor for RNA polymerase II [Source:HGNC Symbol;Acc:HGNC:23114]	protein_coding,protein_coding	GO:0006366,GO:0006368,GO:0008023,GO:0042795,GO:0016607,GO:0015030,GO:0005829,GO:0005654,GO:0001701,GO:0016604,GO:0019902,GO:0035327,GO:0032968,GO:0042795,GO:0042796,GO:0045945,GO:0008023,GO:0035363,GO:0008654,GO:0004512,GO:0006021	transcription by RNA polymerase II,transcription elongation from RNA polymerase II promoter,transcription elongation factor complex,snRNA transcription by RNA polymerase II,nuclear speck,Cajal body,cytosol,nucleoplasm,in utero embryonic development,nuclear body,phosphatase binding,transcriptionally active chromatin,positive regulation of transcription elongation from RNA polymerase II promoter,sn…	1.05757	7.13714	4.99045	0.0481845	0.307563	2
ENSCAFG00845030719	ATP6V1E1	477740		protein_coding	GO:1902600,GO:0046961,GO:0033178,GO:0005737,GO:0005768,GO:0005829,GO:0005902,GO:0016324	proton transmembrane transport,proton-transporting ATPase activity, rotational mechanism,proton-transporting two-sector ATPase complex, catalytic domain,cytoplasm,endosome,cytosol,microvillus,apical plasma membrane	0.718119	5.86923	4.98841	0.0482226	0.307563	2
ENSCAFG00845030784	BLOC1S6,BLOC1S6	478289,478288	,	protein_coding,protein_coding	GO:0016491	oxidoreductase activity	1.49128	8.3823	4.98532	0.0482803	0.307738	2
ENSCAFG00845014811		NA		lncRNA			1.59798	2.64734	4.97717	0.0484327	0.307836	2
ENSCAFG00845030357	KLHL15	119868409	kelch like family member 15 [Source:HGNC Symbol;Acc:HGNC:29347]	protein_coding	GO:0005515,GO:0016567,GO:0031463,GO:0006511,GO:0071630,GO:2000042,GO:0005634	protein binding,protein ubiquitination,Cul3-RING ubiquitin ligase complex,ubiquitin-dependent protein catabolic process,nuclear protein quality control by the ubiquitin-proteasome system,negative regulation of double-strand break repair via homologous recombination,nucleus	0.523661	5.49187	4.96926	0.0485812	0.308355	2
ENSCAFG00845007276	SRPK1	474887	SRSF protein kinase 1 [Source:HGNC Symbol;Acc:HGNC:11305]	protein_coding	GO:0005524,GO:0006468,GO:0004672,GO:0005524,GO:0005737,GO:0005634,GO:0004674,GO:0000287,GO:0016607,GO:0007059,GO:0035556,GO:0000785,GO:0005829,GO:0005886,GO:0005654,GO:0006468,GO:0045070,GO:0045071,GO:0050684	ATP binding,protein phosphorylation,protein kinase activity,ATP binding,cytoplasm,nucleus,protein serine/threonine kinase activity,magnesium ion binding,nuclear speck,chromosome segregation,intracellular signal transduction,chromatin,cytosol,plasma membrane,nucleoplasm,protein phosphorylation,positive regulation of viral genome replication,negative regulation of viral genome replication,regulatio…	0.603413	5.98016	4.96567	0.0486488	0.308612	2
ENSCAFG00845010707		106559817		protein_coding	GO:0003677,GO:0000786,GO:0046982	DNA binding,nucleosome,protein heterodimerization activity	1.31444	-1.39727	4.95869	0.0487806	0.308759	2
ENSCAFG00845014805		NA		lncRNA			1.54744	4.05246	4.95062	0.0489335	0.308793	2
ENSCAFG00845025026	BTG3	487695	BTG anti-proliferation factor 3 [Source:HGNC Symbol;Acc:HGNC:1132]	protein_coding	GO:0045930,GO:0005737	negative regulation of mitotic cell cycle,cytoplasm	1.09672	4.5151	4.93531	0.0492252	0.30947	2
ENSCAFG00845013265		478090		protein_coding			0.41403	6.80838	4.9279	0.049367	0.309784	2
ENSCAFG00845003037		NA		protein_coding			1.21063	-1.83864	4.9238	0.0494459	0.30999	2
ENSCAFG00845004940		NA		lncRNA			1.48732	2.21821	4.91425	0.0496299	0.310053	2
ENSCAFG00845010015	UTP4	489738	UTP4 small subunit processome component [Source:HGNC Symbol;Acc:HGNC:1983]	protein_coding	GO:0005515,GO:0005730,GO:0005694,GO:0006355,GO:0001650,GO:0030490,GO:0034455	protein binding,nucleolus,chromosome,regulation of transcription, DNA-templated,fibrillar center,maturation of SSU-rRNA,t-UTP complex	1.11362	4.98359	4.90959	0.04972	0.310053	2
ENSCAFG00845001655	GAS7	608189		protein_coding	GO:0005515	protein binding	1.09144	7.0427	4.90819	0.0497471	0.310053	2
ENSCAFG00845005023		488770		protein_coding	GO:0042981,GO:0043066	regulation of apoptotic process,negative regulation of apoptotic process	3.46715	6.5761	40.0934	6.73586e-05	0.0524127	3
ENSCAFG00845022313	OAS2	611051	2'-5'-oligoadenylate synthetase 2 [Source:NCBI gene (formerly Entrezgene);Acc:611051]	protein_coding	GO:0016779,GO:0003725,GO:0051607,GO:0005524,GO:0001730,GO:0048471,GO:0051607,GO:0032760,GO:0003725,GO:0009617,GO:0042742,GO:0060337,GO:0032728,GO:0001730,GO:0070106,GO:0070106,GO:0006401,GO:1903487	nucleotidyltransferase activity,double-stranded RNA binding,defense response to virus,ATP binding,2'-5'-oligoadenylate synthetase activity,perinuclear region of cytoplasm,defense response to virus,positive regulation of tumor necrosis factor production,double-stranded RNA binding,response to bacterium,defense response to bacterium,type I interferon signaling pathway,positive regulation of interfe…	2.70585	7.41039	32.1283	0.000169539	0.0952764	3
ENSCAFG00845001935	RCC1L	607700	neutrophil cytosolic factor 1 [Source:HGNC Symbol;Acc:HGNC:7660]	protein_coding	GO:0005515,GO:0005737,GO:0016176,GO:0035091,GO:0016020,GO:0005829,GO:0035091,GO:0042554,GO:0006612,GO:0017124,GO:0045893,GO:0016175,GO:0043325,GO:0014068,GO:0034614,GO:0045741,GO:0046330,GO:0071276,GO:1900745,GO:0005886,GO:0019898,GO:0043020	protein binding,cytoplasm,superoxide-generating NADPH oxidase activator activity,phosphatidylinositol binding,membrane,cytosol,phosphatidylinositol binding,superoxide anion generation,protein targeting to membrane,SH3 domain binding,positive regulation of transcription, DNA-templated,superoxide-generating NAD(P)H oxidase activity,phosphatidylinositol-3,4-bisphosphate binding,positive regulation o…	2.65195	5.2545	23.2839	0.000598298	0.149001	3
ENSCAFG00845014245	PLIN2	100856329	perilipin 2 [Source:HGNC Symbol;Acc:HGNC:248]	protein_coding	GO:0015909,GO:0019915,GO:0005634,GO:0005737,GO:0005811,GO:0005829,GO:0005886	long-chain fatty acid transport,lipid storage,nucleus,cytoplasm,lipid droplet,cytosol,plasma membrane	2.58859	7.40949	22.8632	0.000640585	0.150694	3
ENSCAFG00845020576	RAB8B	610601	RAB8B, member RAS oncogene family [Source:HGNC Symbol;Acc:HGNC:30273]	protein_coding	GO:0005525,GO:0003924,GO:0005778,GO:0019003,GO:0045335,GO:0005654,GO:0043231,GO:0016604,GO:0005102,GO:0019882,GO:0045046	GTP binding,GTPase activity,peroxisomal membrane,GDP binding,phagocytic vesicle,nucleoplasm,intracellular membrane-bounded organelle,nuclear body,signaling receptor binding,antigen processing and presentation,protein import into peroxisome membrane	2.09822	8.50688	21.3406	0.000826546	0.15448	3
ENSCAFG00845000405		NA		protein_coding	GO:0006915,GO:0006974,GO:0006919,GO:0001836	apoptotic process,cellular response to DNA damage stimulus,activation of cysteine-type endopeptidase activity involved in apoptotic process,release of cytochrome c from mitochondria	2.41539	1.14324	18.7811	0.00130769	0.15448	3
ENSCAFG00845002651		102156541		protein_coding	GO:0042113,GO:0002764	B cell activation,immune response-regulating signaling pathway	1.98942	5.01673	18.6527	0.00133963	0.15448	3
ENSCAFG00845000742	MALT1	476188	MALT1 paracaspase [Source:HGNC Symbol;Acc:HGNC:6819]	protein_coding	GO:0006508,GO:0004197,GO:0051092,GO:0005737,GO:0005634,GO:0005829,GO:0006508,GO:0045087,GO:0004842,GO:0007250,GO:0032991,GO:0051168,GO:0071222,GO:0032743,GO:0004175,GO:0043621,GO:0051092,GO:0042802,GO:0002020,GO:0050852,GO:0001923,GO:0009620,GO:0042098,GO:0042113,GO:0042981,GO:0050856,GO:0050870,GO:0019209,GO:0008233,GO:0002726,GO:0031663,GO:0032731,GO:0043280,GO:0051603,GO:2000321,GO:0001650,GO:…	proteolysis,cysteine-type endopeptidase activity,positive regulation of NF-kappaB transcription factor activity,cytoplasm,nucleus,cytosol,proteolysis,innate immune response,ubiquitin-protein transferase activity,activation of NF-kappaB-inducing kinase activity,protein-containing complex,nuclear export,cellular response to lipopolysaccharide,positive regulation of interleukin-2 production,endopept…	1.23583	6.7054	17.4479	0.0016893	0.15448	3
ENSCAFG00845018182	TRIM25	491103	tripartite motif containing 25 [Source:HGNC Symbol;Acc:HGNC:12932]	protein_coding	GO:0046872,GO:0005515,GO:0003713,GO:0039552,GO:0061630,GO:0006511,GO:0006513,GO:0030433,GO:0032880,GO:0043123,GO:0043627,GO:0045087,GO:0046596,GO:0046597,GO:0051091,GO:0051092,GO:1902186,GO:1902187,GO:1990830,GO:0005634,GO:0005654,GO:0005737,GO:0005829,GO:0010494,GO:0016604	metal ion binding,protein binding,transcription coactivator activity,RIG-I binding,ubiquitin protein ligase activity,ubiquitin-dependent protein catabolic process,protein monoubiquitination,ubiquitin-dependent ERAD pathway,regulation of protein localization,positive regulation of I-kappaB kinase/NF-kappaB signaling,response to estrogen,innate immune response,regulation of viral entry into host ce…	0.956074	6.26092	16.4349	0.00207032	0.15448	3
ENSCAFG00845008986	PLAU	403426	plasminogen activator, urokinase [Source:NCBI gene (formerly Entrezgene);Acc:403426]	protein_coding	GO:0006508,GO:0008236,GO:0004252,GO:0031639,GO:0001666,GO:0010469,GO:0014909,GO:0014910,GO:0030335,GO:0033628,GO:0042127,GO:0042730,GO:2000097,GO:0005615,GO:0009986	proteolysis,serine-type peptidase activity,serine-type endopeptidase activity,plasminogen activation,response to hypoxia,regulation of signaling receptor activity,smooth muscle cell migration,regulation of smooth muscle cell migration,positive regulation of cell migration,regulation of cell adhesion mediated by integrin,regulation of cell population proliferation,fibrinolysis,regulation of smooth…	2.00806	4.76534	16.3015	0.00212784	0.15448	3
ENSCAFG00845028738		NA		lncRNA			2.00874	-2.43568	15.6149	0.00245575	0.15448	3
ENSCAFG00845022393	ADORA2A	403960	adenosine A2a receptor [Source:NCBI gene (formerly Entrezgene);Acc:403960]	protein_coding	GO:0007186,GO:0016021,GO:0004930,GO:0001609,GO:0001973,GO:0019899,GO:0042802,GO:0001963,GO:0001975,GO:0007189,GO:0007626,GO:0032230,GO:0042755,GO:0046636,GO:0050728,GO:0060080,GO:2001235,GO:0005886,GO:0005887,GO:0016020	G protein-coupled receptor signaling pathway,integral component of membrane,G protein-coupled receptor activity,G protein-coupled adenosine receptor activity,G protein-coupled adenosine receptor signaling pathway,enzyme binding,identical protein binding,synaptic transmission, dopaminergic,response to amphetamine,adenylate cyclase-activating G protein-coupled receptor signaling pathway,locomotory …	1.95632	4.18152	15.4338	0.00255203	0.15448	3
ENSCAFG00845018858	ELMO2	119865677	engulfment and cell motility 2 [Source:HGNC Symbol;Acc:HGNC:17233]	protein_coding	GO:0007010,GO:0098609,GO:0016477,GO:0030971,GO:0060326,GO:0005829,GO:0016020	cytoskeleton organization,cell-cell adhesion,cell migration,receptor tyrosine kinase binding,cell chemotaxis,cytosol,membrane	1.08442	5.68768	15.0136	0.0027935	0.15448	3
[truncated: 2,371 more rows]
