# Supplementary material for: Phenotypic and Transcriptional Changes of Pulmonary Immune Responses in Dogs Following Canine Distemper Virus Infection
Source: Int J Mol Sci. 2022 Sep 2;23(17):10019. doi: 10.3390/ijms231710019 (PMC9456005; doi:10.3390/ijms231710019)
Supplement: Supplementary file 1 [file ijms-23-10019-s001.zip › Supplementary_Table_S2_Chludzinski et al_10.08.2022.xlsx]

## Sheet: Sheet 1
	Supplementary Table S2: Enrichment analysis using gene ontology terms annotated to biological function
GO.BiologicalFunction.Cluster	GO.BiologicalFunction.ID	GO.BiologicalFunction.Description	GO.BiologicalFunction.GeneRatio	GO.BiologicalFunction.BgRatio	GO.BiologicalFunction.pvalue	GO.BiologicalFunction.p.adjust	GO.BiologicalFunction.qvalue	GO.BiologicalFunction.geneID	GO.BiologicalFunction.Count
1	GO:0000278	mitotic cell cycle	34/143	358/7437	2.65269e-15	2.44489e-12	2.09193e-12	KIF4A/KIF14/TTK/CLSPN/CENPK/CDC25C/FBXO5/BUB1B/DLGAP5/ESPL1/UBE2C/TPX2/BLM/MCM4/TICRR/DDIAS/CDCA5/PLK4/ANLN/E2F8/NDC80/DSN1/CCNB3/NCAPH/NEK2/ORC1/CDC6/CCNA2/CENPA/KIF22/ZNF655/CCNB2/CDC7/PKHD1	34
1	GO:1903047	mitotic cell cycle process	31/143	294/7437	3.0504e-15	2.44489e-12	2.09193e-12	KIF4A/KIF14/TTK/CLSPN/CENPK/CDC25C/FBXO5/BUB1B/DLGAP5/ESPL1/UBE2C/TPX2/BLM/MCM4/TICRR/CDCA5/ANLN/NDC80/DSN1/CCNB3/NCAPH/NEK2/ORC1/CDC6/CCNA2/CENPA/KIF22/ZNF655/CCNB2/CDC7/PKHD1	31
1	GO:0022402	cell cycle process	38/143	487/7437	2.83069e-14	1.51253e-11	1.29417e-11	IL12B/KIF4A/KIF14/TTK/CLSPN/CENPK/CDKN3/ASPM/CDC25C/FBXO5/BUB1B/PRR11/DLGAP5/ESPL1/UBE2C/TPX2/BLM/MCM4/TICRR/DDIAS/CDCA5/PLK4/ANLN/E2F8/NDC80/DSN1/CCNB3/NCAPH/NEK2/ORC1/CDC6/CCNA2/CENPA/KIF22/ZNF655/CCNB2/CDC7/PKHD1	38
1	GO:0000070	mitotic sister chromatid segregation	15/143	82/7437	2.87278e-11	1.15127e-08	9.8506e-09	KIF4A/KIF14/TTK/CENPK/FBXO5/BUB1B/ESPL1/UBE2C/CDCA5/NDC80/DSN1/NCAPH/NEK2/CDC6/KIF22	15
1	GO:0051726	regulation of cell cycle	29/143	384/7437	1.27093e-10	4.07459e-08	3.48635e-08	IL12B/KIF14/TTK/CLSPN/CDKN3/ASPM/CDC25C/FBXO5/BUB1B/PRR11/DLGAP5/UBE2C/TPX2/BLM/PCLAF/TICRR/DDIAS/PLK4/E2F8/NDC80/CCNB3/NEK2/ORC1/CDC6/CCNA2/ZNF655/CCNB2/CDC7/PKHD1	29
1	GO:0000819	sister chromatid segregation	15/143	95/7437	2.57145e-10	6.87007e-08	5.87825e-08	KIF4A/KIF14/TTK/CENPK/FBXO5/BUB1B/ESPL1/UBE2C/CDCA5/NDC80/DSN1/NCAPH/NEK2/CDC6/KIF22	15
1	GO:0002252	immune effector process	23/143	251/7437	3.13383e-10	7.17647e-08	6.14043e-08	OASL/DHX58/OAS1/NLRC5/LOC488947/IFIH1/BST2/IL12B/IFI35/RNASEL/DNASE1L3/SAMHD1/DTX3L/LOC477518/C1R/CRTAM/EXO1/KLRD1/PLCL2/LIG4/C6/IL23R/EOMES	23
1	GO:0051301	cell division	19/143	174/7437	6.59805e-10	1.32208e-07	1.13122e-07	KIF4A/KIF14/ASPM/CDC25C/FBXO5/TPX2/BLM/CDCA5/PLK4/ANLN/E2F8/NDC80/MIS18A/SPC24/DSN1/CCNB3/NCAPH/CDC6/CENPA	19
1	GO:0010389	regulation of G2/M transition of mitotic cell cycle	10/143	38/7437	1.50413e-09	2.44195e-07	2.08941e-07	KIF14/CLSPN/CDC25C/FBXO5/BLM/TICRR/CCNB3/ORC1/CDC6/CDC7	10
1	GO:0044839	cell cycle G2/M phase transition	12/143	62/7437	1.52336e-09	2.44195e-07	2.08941e-07	KIF14/CLSPN/CDC25C/FBXO5/BLM/TICRR/CCNB3/ORC1/CDC6/CCNA2/CCNB2/CDC7	12
1	GO:0007059	chromosome segregation	17/143	145/7437	1.86411e-09	2.71652e-07	2.32435e-07	KIF4A/KIF14/TTK/CENPK/FBXO5/BUB1B/DLGAP5/ESPL1/UBE2C/CDCA5/NDC80/MIS18A/DSN1/NCAPH/NEK2/CDC6/KIF22	17
1	GO:1901990	regulation of mitotic cell cycle phase transition	15/143	110/7437	2.14246e-09	2.86198e-07	2.4488e-07	KIF14/TTK/CLSPN/CDC25C/FBXO5/BUB1B/UBE2C/BLM/TICRR/NDC80/CCNB3/ORC1/CDC6/ZNF655/CDC7	15
1	GO:0006955	immune response	31/143	495/7437	2.81837e-09	3.47526e-07	2.97355e-07	OASL/DHX58/OAS1/NLRC5/LOC488947/IFIH1/PARP9/BST2/TRAFD1/IL12B/IFI35/DNASE1L3/SAMHD1/LOC477518/C1R/CRTAM/DLA-12/DLA88/EXO1/KLRD1/PLCL2/LIG4/PDCD1LG2/C6/IFNAR2/CTSS/C9/CYSLTR1/CCL5/IL23R/EOMES	31
1	GO:0140014	mitotic nuclear division	16/143	132/7437	3.53017e-09	4.01729e-07	3.43733e-07	KIF4A/KIF14/TTK/CENPK/FBXO5/BUB1B/ESPL1/UBE2C/TPX2/CDCA5/NDC80/DSN1/NCAPH/NEK2/CDC6/KIF22	16
1	GO:0051607	defense response to virus	13/143	82/7437	4.06646e-09	4.01729e-07	3.43733e-07	OASL/DHX58/OAS1/NLRC5/LOC488947/IFIH1/BST2/IL12B/RNASEL/SAMHD1/DTX3L/LOC477518/IL23R	13
1	GO:0140546	defense response to symbiont	13/143	82/7437	4.06646e-09	4.01729e-07	3.43733e-07	OASL/DHX58/OAS1/NLRC5/LOC488947/IFIH1/BST2/IL12B/RNASEL/SAMHD1/DTX3L/LOC477518/IL23R	13
1	GO:0000086	G2/M transition of mitotic cell cycle	11/143	54/7437	4.26038e-09	4.01729e-07	3.43733e-07	KIF14/CLSPN/CDC25C/FBXO5/BLM/TICRR/CCNB3/ORC1/CDC6/CCNA2/CDC7	11
1	GO:0044772	mitotic cell cycle phase transition	17/143	158/7437	7.05352e-09	6.28155e-07	5.3747e-07	KIF14/TTK/CLSPN/CDC25C/FBXO5/BUB1B/UBE2C/BLM/TICRR/NDC80/CCNB3/ORC1/CDC6/CCNA2/ZNF655/CCNB2/CDC7	17
1	GO:0098813	nuclear chromosome segregation	15/143	121/7437	8.21635e-09	6.932e-07	5.93125e-07	KIF4A/KIF14/TTK/CENPK/FBXO5/BUB1B/ESPL1/UBE2C/CDCA5/NDC80/DSN1/NCAPH/NEK2/CDC6/KIF22	15
1	GO:1902749	regulation of cell cycle G2/M phase transition	10/143	46/7437	1.1375e-08	8.82029e-07	7.54692e-07	KIF14/CLSPN/CDC25C/FBXO5/BLM/TICRR/CCNB3/ORC1/CDC6/CDC7	10
1	GO:1901987	regulation of cell cycle phase transition	15/143	124/7437	1.1555e-08	8.82029e-07	7.54692e-07	KIF14/TTK/CLSPN/CDC25C/FBXO5/BUB1B/UBE2C/BLM/TICRR/NDC80/CCNB3/ORC1/CDC6/ZNF655/CDC7	15
1	GO:0048285	organelle fission	19/143	208/7437	1.34005e-08	9.7641e-07	8.35448e-07	KIF4A/KIF14/TTK/CENPK/ASPM/FBXO5/BUB1B/ESPL1/UBE2C/TPX2/CDCA5/NDC80/DSN1/NCAPH/NEK2/CDC6/KIF22/CCNB2/MTFR2	19
1	GO:0000280	nuclear division	18/143	187/7437	1.4654e-08	1.02132e-06	8.73874e-07	KIF4A/KIF14/TTK/CENPK/ASPM/FBXO5/BUB1B/ESPL1/UBE2C/TPX2/CDCA5/NDC80/DSN1/NCAPH/NEK2/CDC6/KIF22/CCNB2	18
1	GO:0009615	response to virus	14/143	109/7437	1.67405e-08	1.11813e-06	9.56705e-07	OASL/DHX58/EIF2AK2/OAS1/NLRC5/LOC488947/IFIH1/BST2/IL12B/RNASEL/SAMHD1/DTX3L/LOC477518/IL23R	14
1	GO:0051276	chromosome organization	28/143	450/7437	2.20313e-08	1.41265e-06	1.20871e-06	KIF4A/DTX3L/KIF14/TTK/CENPK/FBXO5/BUB1B/TOP2A/DLGAP5/ESPL1/UBE2C/BLM/MCM4/CDCA5/NDC80/ASF1B/SMCHD1/MIS18A/DSN1/NCAPH/NEK2/LIG4/CDC6/CCNA2/GFI1/CENPA/KIF22/ATAD2	28
1	GO:0010564	regulation of cell cycle process	20/143	240/7437	2.59025e-08	1.59699e-06	1.36643e-06	KIF14/TTK/CLSPN/CDC25C/FBXO5/BUB1B/UBE2C/TPX2/BLM/TICRR/PLK4/E2F8/NDC80/CCNB3/NEK2/ORC1/CDC6/ZNF655/CDC7/PKHD1	20
1	GO:0044770	cell cycle phase transition	17/143	173/7437	2.79475e-08	1.65925e-06	1.41971e-06	KIF14/TTK/CLSPN/CDC25C/FBXO5/BUB1B/UBE2C/BLM/TICRR/NDC80/CCNB3/ORC1/CDC6/CCNA2/ZNF655/CCNB2/CDC7	17
1	GO:0007346	regulation of mitotic cell cycle	17/143	174/7437	3.04715e-08	1.7445e-06	1.49265e-06	KIF14/TTK/CLSPN/CDC25C/FBXO5/BUB1B/DLGAP5/UBE2C/BLM/TICRR/DDIAS/NDC80/CCNB3/ORC1/CDC6/ZNF655/CDC7	17
1	GO:0031347	regulation of defense response	17/143	182/7437	5.955e-08	3.29168e-06	2.81647e-06	DHX58/NLRC5/LOC488947/PARP9/TRAFD1/IL12B/IFI35/DNASE1L3/SAMHD1/CASP12/DTX3L/CASP4/PTGES/CRTAM/PBK/KLRD1/IL23R	17
1	GO:0006261	DNA-dependent DNA replication	11/143	70/7437	7.40459e-08	3.95652e-06	3.38533e-06	SAMHD1/FBXO5/BLM/MCM4/TICRR/E2F8/TRAIP/ORC1/CDC6/CDC7/RFC2	11
1	GO:0006260	DNA replication	13/143	106/7437	9.77728e-08	5.0558e-06	4.32591e-06	SAMHD1/FBXO5/BLM/MCM4/TICRR/E2F8/TRAIP/LIG4/ORC1/CDC6/CCNA2/CDC7/RFC2	13
1	GO:0006952	defense response	28/143	484/7437	1.05085e-07	5.2641e-06	4.50413e-06	OASL/DHX58/OAS1/NLRC5/LOC488947/IFIH1/PARP9/BST2/TRAFD1/IL12B/IFI35/RNASEL/DNASE1L3/SAMHD1/CASP12/DTX3L/CASP4/LOC477518/PTGES/CRTAM/PBK/KLRD1/C6/IFNAR2/CXCR3/CYSLTR1/CCL5/IL23R	28
1	GO:0045087	innate immune response	18/143	214/7437	1.1929e-07	5.79459e-06	4.95804e-06	OASL/DHX58/OAS1/NLRC5/LOC488947/IFIH1/PARP9/BST2/TRAFD1/IL12B/IFI35/SAMHD1/LOC477518/CRTAM/KLRD1/C6/IFNAR2/IL23R	18
1	GO:0051707	response to other organism	25/143	400/7437	1.30086e-07	6.13317e-06	5.24774e-06	OASL/DHX58/EIF2AK2/OAS1/NLRC5/LOC488947/IFIH1/PARP9/BST2/TRAFD1/IL12B/IFI35/RNASEL/SAMHD1/DTX3L/LOC477518/CRTAM/KLRD1/RGS1/TICAM2/GFI1/PDCD1LG2/C6/IFNAR2/IL23R	25
1	GO:0043207	response to external biotic stimulus	25/143	401/7437	1.36529e-07	6.25305e-06	5.35031e-06	OASL/DHX58/EIF2AK2/OAS1/NLRC5/LOC488947/IFIH1/PARP9/BST2/TRAFD1/IL12B/IFI35/RNASEL/SAMHD1/DTX3L/LOC477518/CRTAM/KLRD1/RGS1/TICAM2/GFI1/PDCD1LG2/C6/IFNAR2/IL23R	25
1	GO:1901991	negative regulation of mitotic cell cycle phase transition	10/143	63/7437	2.69882e-07	1.19785e-05	1.02492e-05	TTK/CLSPN/FBXO5/BUB1B/BLM/TICRR/NDC80/ORC1/CDC6/ZNF655	10
1	GO:0009607	response to biotic stimulus	25/143	416/7437	2.76484e-07	1.19785e-05	1.02492e-05	OASL/DHX58/EIF2AK2/OAS1/NLRC5/LOC488947/IFIH1/PARP9/BST2/TRAFD1/IL12B/IFI35/RNASEL/SAMHD1/DTX3L/LOC477518/CRTAM/KLRD1/RGS1/TICAM2/GFI1/PDCD1LG2/C6/IFNAR2/IL23R	25
1	GO:0010948	negative regulation of cell cycle process	12/143	98/7437	3.16972e-07	1.33712e-05	1.14408e-05	TTK/CLSPN/FBXO5/BUB1B/BLM/TICRR/E2F8/NDC80/NEK2/ORC1/CDC6/ZNF655	12
1	GO:0002831	regulation of response to biotic stimulus	12/143	99/7437	3.5481e-07	1.45836e-05	1.24782e-05	DHX58/NLRC5/LOC488947/PARP9/TRAFD1/IL12B/IFI35/SAMHD1/DTX3L/CRTAM/KLRD1/IL23R	12
1	GO:0045786	negative regulation of cell cycle	16/143	185/7437	4.34126e-07	1.73976e-05	1.48859e-05	IL12B/TTK/CLSPN/CDKN3/FBXO5/BUB1B/PRR11/BLM/TICRR/DDIAS/E2F8/NDC80/NEK2/ORC1/CDC6/ZNF655	16
1	GO:0006259	DNA metabolic process	22/143	342/7437	4.99848e-07	1.95428e-05	1.67215e-05	APAF1/DNASE1L3/SAMHD1/DTX3L/GZMA/PARPBP/TOP2A/BLM/PCLAF/MCM4/TICRR/SMCHD1/EXO1/MIS18A/SESN2/TRAIP/NEK2/LIG4/ORC1/CDC6/CDC7/RFC2	22
1	GO:1901988	negative regulation of cell cycle phase transition	10/143	70/7437	7.46905e-07	2.85069e-05	2.43914e-05	TTK/CLSPN/FBXO5/BUB1B/BLM/TICRR/NDC80/ORC1/CDC6/ZNF655	10
1	GO:0098542	defense response to other organism	20/143	296/7437	8.09087e-07	3.0162e-05	2.58076e-05	OASL/DHX58/OAS1/NLRC5/LOC488947/IFIH1/PARP9/BST2/TRAFD1/IL12B/IFI35/RNASEL/SAMHD1/DTX3L/LOC477518/CRTAM/KLRD1/C6/IFNAR2/IL23R	20
1	GO:0045930	negative regulation of mitotic cell cycle	11/143	89/7437	9.14674e-07	3.33232e-05	2.85125e-05	TTK/CLSPN/FBXO5/BUB1B/BLM/TICRR/DDIAS/NDC80/ORC1/CDC6/ZNF655	11
1	GO:0045088	regulation of innate immune response	9/143	62/7437	2.38198e-06	8.48516e-05	7.26018e-05	DHX58/NLRC5/PARP9/TRAFD1/IL12B/IFI35/SAMHD1/CRTAM/KLRD1	9
1	GO:0045071	negative regulation of viral genome replication	6/143	23/7437	3.50799e-06	0.000122246	0.000104597	OASL/EIF2AK2/OAS1/LOC488947/RNASEL/LOC477518	6
1	GO:0044419	biological process involved in interspecies interaction between organisms	25/143	482/7437	4.20332e-06	0.00014336	0.000122663	OASL/DHX58/EIF2AK2/OAS1/NLRC5/LOC488947/IFIH1/PARP9/BST2/TRAFD1/IL12B/IFI35/RNASEL/SAMHD1/DTX3L/LOC477518/CRTAM/KLRD1/RGS1/TICAM2/GFI1/PDCD1LG2/C6/IFNAR2/IL23R	25
1	GO:0007093	mitotic cell cycle checkpoint	8/143	52/7437	5.65657e-06	0.000188906	0.000161634	TTK/CLSPN/BUB1B/BLM/TICRR/NDC80/ORC1/CDC6	8
1	GO:0051304	chromosome separation	7/143	42/7437	1.28898e-05	0.000421682	0.000360805	TTK/FBXO5/BUB1B/ESPL1/UBE2C/NDC80/CDC6	7
1	GO:0090329	regulation of DNA-dependent DNA replication	6/143	29/7437	1.50092e-05	0.000481193	0.000411725	FBXO5/BLM/TICRR/E2F8/CDC7/RFC2	6
1	GO:0080134	regulation of response to stress	22/143	422/7437	1.58599e-05	0.000498498	0.000426531	DHX58/EIF2AK2/NLRC5/LOC488947/PARP9/TRAFD1/IL12B/IFI35/DNASE1L3/SAMHD1/CASP12/DTX3L/CASP4/PTGES/FBXO5/PARPBP/CRTAM/DDIAS/PBK/KLRD1/SESN2/IL23R	22
1	GO:0044818	mitotic G2/M transition checkpoint	5/143	18/7437	1.71632e-05	0.000529088	0.000452705	CLSPN/BLM/TICRR/ORC1/CDC6	5
1	GO:0030071	regulation of mitotic metaphase/anaphase transition	6/143	30/7437	1.84665e-05	0.000538215	0.000460515	TTK/FBXO5/BUB1B/UBE2C/NDC80/CDC6	6
1	GO:0048525	negative regulation of viral process	6/143	30/7437	1.84665e-05	0.000538215	0.000460515	OASL/EIF2AK2/OAS1/LOC488947/RNASEL/LOC477518	6
1	GO:1902099	regulation of metaphase/anaphase transition of cell cycle	6/143	30/7437	1.84665e-05	0.000538215	0.000460515	TTK/FBXO5/BUB1B/UBE2C/NDC80/CDC6	6
1	GO:0007051	spindle organization	9/143	80/7437	2.03025e-05	0.000581159	0.000497258	KIF4A/ASPM/FBXO5/DLGAP5/ESPL1/TPX2/NDC80/NEK2/CCNB2	9
1	GO:0007091	metaphase/anaphase transition of mitotic cell cycle	6/143	31/7437	2.25386e-05	0.000622922	0.000532992	TTK/FBXO5/BUB1B/UBE2C/NDC80/CDC6	6
1	GO:0044784	metaphase/anaphase transition of cell cycle	6/143	31/7437	2.25386e-05	0.000622922	0.000532992	TTK/FBXO5/BUB1B/UBE2C/NDC80/CDC6	6
1	GO:0032069	regulation of nuclease activity	4/143	10/7437	2.51608e-05	0.000672213	0.000575167	OASL/OAS1/GZMA/LOC477518	4
1	GO:0071459	protein localization to chromosome, centromeric region	4/143	10/7437	2.51608e-05	0.000672213	0.000575167	TTK/BUB1B/NDC80/CENPA	4
1	GO:0010965	regulation of mitotic sister chromatid separation	6/143	32/7437	2.73041e-05	0.000694578	0.000594303	TTK/FBXO5/BUB1B/UBE2C/NDC80/CDC6	6
1	GO:0045069	regulation of viral genome replication	6/143	32/7437	2.73041e-05	0.000694578	0.000594303	OASL/EIF2AK2/OAS1/LOC488947/RNASEL/LOC477518	6
1	GO:0051306	mitotic sister chromatid separation	6/143	32/7437	2.73041e-05	0.000694578	0.000594303	TTK/FBXO5/BUB1B/UBE2C/NDC80/CDC6	6
1	GO:0006275	regulation of DNA replication	7/143	47/7437	2.77311e-05	0.000694578	0.000594303	FBXO5/BLM/TICRR/E2F8/CCNA2/CDC7/RFC2	7
1	GO:0019221	cytokine-mediated signaling pathway	12/143	151/7437	3.05789e-05	0.000754123	0.000645252	NLRC5/PARP9/IL12B/SAMHD1/IL12RB2/TRAIP/TICAM2/GFI1/VRK2/IFNAR2/CCL5/IL23R	12
1	GO:1905818	regulation of chromosome separation	6/143	33/7437	3.28474e-05	0.000797795	0.000682619	TTK/FBXO5/BUB1B/UBE2C/NDC80/CDC6	6
1	GO:0002833	positive regulation of response to biotic stimulus	7/143	49/7437	3.66807e-05	0.000877598	0.000750902	DHX58/NLRC5/PARP9/IL12B/IFI35/CRTAM/KLRD1	7
1	GO:0033045	regulation of sister chromatid segregation	6/143	34/7437	3.92598e-05	0.000925493	0.000791882	TTK/FBXO5/BUB1B/UBE2C/NDC80/CDC6	6
1	GO:0045824	negative regulation of innate immune response	5/143	22/7437	4.95771e-05	0.00115177	0.000985492	DHX58/NLRC5/TRAFD1/SAMHD1/KLRD1	5
1	GO:0001959	regulation of cytokine-mediated signaling pathway	7/143	52/7437	5.44446e-05	0.00124375	0.00106419	NLRC5/PARP9/SAMHD1/TRAIP/TICAM2/GFI1/VRK2	7
1	GO:0051983	regulation of chromosome segregation	6/143	36/7437	5.5088e-05	0.00124375	0.00106419	TTK/FBXO5/BUB1B/UBE2C/NDC80/CDC6	6
1	GO:0051383	kinetochore organization	4/143	12/7437	5.75523e-05	0.00128134	0.00109636	CENPK/DLGAP5/NDC80/CENPA	4
1	GO:0010972	negative regulation of G2/M transition of mitotic cell cycle	5/143	23/7437	6.23741e-05	0.00136967	0.00117193	CLSPN/BLM/TICRR/ORC1/CDC6	5
1	GO:0060759	regulation of response to cytokine stimulus	7/143	54/7437	6.97987e-05	0.00151199	0.00129371	NLRC5/PARP9/SAMHD1/TRAIP/TICAM2/GFI1/VRK2	7
1	GO:0090068	positive regulation of cell cycle process	9/143	94/7437	7.41375e-05	0.00158457	0.00135581	KIF14/CDC25C/FBXO5/UBE2C/PLK4/E2F8/NDC80/CDC6/CDC7	9
1	GO:0045089	positive regulation of innate immune response	6/143	38/7437	7.56476e-05	0.00159103	0.00136134	NLRC5/PARP9/IL12B/IFI35/CRTAM/KLRD1	6
1	GO:0032101	regulation of response to external stimulus	17/143	307/7437	7.64251e-05	0.00159103	0.00136134	DHX58/NLRC5/LOC488947/PARP9/TRAFD1/IL12B/IFI35/DNASE1L3/SAMHD1/CASP12/DTX3L/CASP4/PTGES/CRTAM/PBK/KLRD1/IL23R	17
1	GO:0034508	centromere complex assembly	4/143	13/7437	8.18928e-05	0.001683	0.00144003	CENPK/DLGAP5/MIS18A/CENPA	4
1	GO:0000075	cell cycle checkpoint	8/143	77/7437	0.00010552	0.00214113	0.00183202	TTK/CLSPN/BUB1B/BLM/TICRR/NDC80/ORC1/CDC6	8
1	GO:0006270	DNA replication initiation	4/143	15/7437	0.000151721	0.00304011	0.00260122	MCM4/TICRR/ORC1/CDC6	4
1	GO:0044774	mitotic DNA integrity checkpoint	5/143	28/7437	0.000168606	0.00329604	0.0028202	CLSPN/BLM/TICRR/ORC1/CDC6	5
1	GO:0050688	regulation of defense response to virus	5/143	28/7437	0.000168606	0.00329604	0.0028202	DHX58/LOC488947/IL12B/DTX3L/IL23R	5
1	GO:1902850	microtubule cytoskeleton organization involved in mitosis	7/143	63/7437	0.000188791	0.00364617	0.00311978	KIF4A/DLGAP5/TPX2/NDC80/NEK2/CENPA/PKHD1	7
1	GO:1902750	negative regulation of cell cycle G2/M phase transition	5/143	29/7437	0.000200605	0.00382822	0.00327555	CLSPN/BLM/TICRR/ORC1/CDC6	5
1	GO:0000910	cytokinesis	7/143	67/7437	0.00027836	0.00524955	0.00449169	KIF4A/KIF14/PLK4/ANLN/E2F8/CDC6/CENPA	7
1	GO:0019079	viral genome replication	6/143	48/7437	0.000287149	0.00535233	0.00457963	OASL/EIF2AK2/OAS1/LOC488947/RNASEL/LOC477518	6
1	GO:0050776	regulation of immune response	13/143	225/7437	0.00037065	0.00682933	0.0058434	DHX58/NLRC5/PARP9/TRAFD1/IL12B/IFI35/SAMHD1/C1R/CRTAM/KLRD1/PLCL2/C6/IL23R	13
1	GO:0051321	meiotic cell cycle	8/143	93/7437	0.000394441	0.00715923	0.00612567	TTK/ASPM/CDC25C/FBXO5/BUB1B/ESPL1/CCNB3/CCNB2	8
1	GO:0050777	negative regulation of immune response	6/143	51/7437	0.000401953	0.00715923	0.00612567	DHX58/NLRC5/TRAFD1/IL12B/SAMHD1/KLRD1	6
1	GO:0051225	spindle assembly	6/143	51/7437	0.000401953	0.00715923	0.00612567	KIF4A/ASPM/FBXO5/TPX2/NEK2/CCNB2	6
1	GO:1903900	regulation of viral life cycle	6/143	53/7437	0.000496499	0.00874603	0.00748339	OASL/EIF2AK2/OAS1/LOC488947/RNASEL/LOC477518	6
1	GO:0044786	cell cycle DNA replication	4/143	21/7437	0.000608116	0.0104818	0.0089686	FBXO5/MCM4/E2F8/CDC7	4
1	GO:0071357	cellular response to type I interferon	4/143	21/7437	0.000608116	0.0104818	0.0089686	NLRC5/LOC488947/SAMHD1/IFNAR2	4
1	GO:0002832	negative regulation of response to biotic stimulus	5/143	37/7437	0.000650772	0.0110977	0.00949559	DHX58/NLRC5/TRAFD1/SAMHD1/KLRD1	5
1	GO:0031348	negative regulation of defense response	7/143	78/7437	0.000709416	0.0119705	0.0102423	DHX58/NLRC5/TRAFD1/IL12B/SAMHD1/PBK/KLRD1	7
1	GO:0045841	negative regulation of mitotic metaphase/anaphase transition	4/143	22/7437	0.000732236	0.012054	0.0103138	TTK/FBXO5/BUB1B/NDC80	4
1	GO:1902100	negative regulation of metaphase/anaphase transition of cell cycle	4/143	22/7437	0.000732236	0.012054	0.0103138	TTK/FBXO5/BUB1B/NDC80	4
1	GO:0050792	regulation of viral process	6/143	57/7437	0.000736925	0.012054	0.0103138	OASL/EIF2AK2/OAS1/LOC488947/RNASEL/LOC477518	6
1	GO:0019835	cytolysis	3/143	10/7437	0.000756612	0.012251	0.0104824	C6/PRF1/C9	3
1	GO:0051052	regulation of DNA metabolic process	9/143	128/7437	0.000764719	0.0122584	0.0104887	APAF1/DTX3L/GZMA/PARPBP/BLM/TICRR/MIS18A/NEK2/RFC2	9
1	GO:0045787	positive regulation of cell cycle	9/143	129/7437	0.000808849	0.0126111	0.0107905	KIF14/CDC25C/FBXO5/UBE2C/PLK4/E2F8/NDC80/CDC6/CDC7	9
1	GO:0002682	regulation of immune system process	19/143	445/7437	0.000823929	0.0126111	0.0107905	DHX58/NLRC5/LOC488947/PARP9/TRAFD1/IL12B/IFI35/DNASE1L3/SAMHD1/DTX3L/C1R/CRTAM/CYRIB/KLRD1/PLCL2/PDCD1LG2/C6/CXCR3/IL23R	19
1	GO:0001910	regulation of leukocyte mediated cytotoxicity	4/143	23/7437	0.00087326	0.0126111	0.0107905	IL12B/DNASE1L3/CRTAM/KLRD1	4
1	GO:0001961	positive regulation of cytokine-mediated signaling pathway	4/143	23/7437	0.00087326	0.0126111	0.0107905	NLRC5/PARP9/TICAM2/GFI1	4
1	GO:0033046	negative regulation of sister chromatid segregation	4/143	23/7437	0.00087326	0.0126111	0.0107905	TTK/FBXO5/BUB1B/NDC80	4
1	GO:0033048	negative regulation of mitotic sister chromatid segregation	4/143	23/7437	0.00087326	0.0126111	0.0107905	TTK/FBXO5/BUB1B/NDC80	4
1	GO:0034340	response to type I interferon	4/143	23/7437	0.00087326	0.0126111	0.0107905	NLRC5/LOC488947/SAMHD1/IFNAR2	4
1	GO:0051445	regulation of meiotic cell cycle	4/143	23/7437	0.00087326	0.0126111	0.0107905	TTK/ASPM/CDC25C/FBXO5	4
1	GO:0051985	negative regulation of chromosome segregation	4/143	23/7437	0.00087326	0.0126111	0.0107905	TTK/FBXO5/BUB1B/NDC80	4
1	GO:1905819	negative regulation of chromosome separation	4/143	23/7437	0.00087326	0.0126111	0.0107905	TTK/FBXO5/BUB1B/NDC80	4
1	GO:2000816	negative regulation of mitotic sister chromatid separation	4/143	23/7437	0.00087326	0.0126111	0.0107905	TTK/FBXO5/BUB1B/NDC80	4
1	GO:1903046	meiotic cell cycle process	7/143	81/7437	0.000890107	0.0127397	0.0109005	TTK/ASPM/CDC25C/FBXO5/BUB1B/ESPL1/CCNB2	7
1	GO:0065004	protein-DNA complex assembly	6/143	60/7437	0.000969837	0.013758	0.0117717	CENPK/DLGAP5/MCM4/ASF1B/MIS18A/CENPA	6
1	GO:0002717	positive regulation of natural killer cell mediated immunity	3/143	11/7437	0.00102574	0.0141447	0.0121027	IL12B/CRTAM/KLRD1	3
1	GO:0010971	positive regulation of G2/M transition of mitotic cell cycle	3/143	11/7437	0.00102574	0.0141447	0.0121027	CDC25C/FBXO5/CDC7	3
1	GO:0045954	positive regulation of natural killer cell mediated cytotoxicity	3/143	11/7437	0.00102574	0.0141447	0.0121027	IL12B/CRTAM/KLRD1	3
1	GO:0033047	regulation of mitotic sister chromatid segregation	4/143	24/7437	0.0010324	0.0141447	0.0121027	TTK/FBXO5/BUB1B/NDC80	4
1	GO:0006974	cellular response to DNA damage stimulus	15/143	316/7437	0.00105084	0.0142754	0.0122145	SAMHD1/DTX3L/CLSPN/FBXO5/PARPBP/BLM/PCLAF/MCM4/DDIAS/SMCHD1/EXO1/SESN2/TRAIP/LIG4/CDC7	15
1	GO:0006302	double-strand break repair	8/143	108/7437	0.00107077	0.0144239	0.0123416	SAMHD1/DTX3L/PARPBP/BLM/MCM4/SMCHD1/LIG4/CDC7	8
1	GO:0033044	regulation of chromosome organization	8/143	109/7437	0.00113714	0.0151903	0.0129973	TTK/FBXO5/BUB1B/UBE2C/NDC80/NEK2/LIG4/CDC6	8
1	GO:0045839	negative regulation of mitotic nuclear division	4/143	25/7437	0.00121086	0.0157805	0.0135023	TTK/FBXO5/BUB1B/NDC80	4
1	GO:0060760	positive regulation of response to cytokine stimulus	4/143	25/7437	0.00121086	0.0157805	0.0135023	NLRC5/PARP9/TICAM2/GFI1	4
1	GO:0097194	execution phase of apoptosis	4/143	25/7437	0.00121086	0.0157805	0.0135023	APAF1/DNASE1L3/CASP12/CASP4	4
1	GO:0043903	regulation of biological process involved in symbiotic interaction	6/143	63/7437	0.00125566	0.0162324	0.013889	OASL/EIF2AK2/OAS1/LOC488947/RNASEL/LOC477518	6
1	GO:0034097	response to cytokine	14/143	289/7437	0.00127575	0.0163602	0.0139983	EIF2AK2/NLRC5/LOC488947/PARP9/IL12B/SAMHD1/IL12RB2/TRAIP/TICAM2/GFI1/VRK2/IFNAR2/CCL5/IL23R	14
1	GO:0002230	positive regulation of defense response to virus by host	3/143	12/7437	0.00134846	0.0168874	0.0144494	IL12B/DTX3L/IL23R	3
1	GO:0046006	regulation of activated T cell proliferation	3/143	12/7437	0.00134846	0.0168874	0.0144494	IL12B/CRTAM/PDCD1LG2	3
1	GO:1902751	positive regulation of cell cycle G2/M phase transition	3/143	12/7437	0.00134846	0.0168874	0.0144494	CDC25C/FBXO5/CDC7	3
1	GO:0002443	leukocyte mediated immunity	8/143	115/7437	0.00160762	0.0198859	0.017015	IL12B/DNASE1L3/C1R/CRTAM/EXO1/KLRD1/LIG4/C6	8
1	GO:0001906	cell killing	5/143	45/7437	0.0016127	0.0198859	0.017015	IL12B/DNASE1L3/CRTAM/KLRD1/C9	5
1	GO:0050778	positive regulation of immune response	10/143	171/7437	0.00162851	0.0199275	0.0170506	NLRC5/PARP9/IL12B/IFI35/C1R/CRTAM/KLRD1/PLCL2/C6/IL23R	10
1	GO:0000132	establishment of mitotic spindle orientation	3/143	13/7437	0.00172844	0.0208267	0.01782	NDC80/CENPA/PKHD1	3
1	GO:0050798	activated T cell proliferation	3/143	13/7437	0.00172844	0.0208267	0.01782	IL12B/CRTAM/PDCD1LG2	3
1	GO:0071345	cellular response to cytokine stimulus	13/143	266/7437	0.00175942	0.0208267	0.01782	NLRC5/LOC488947/PARP9/IL12B/SAMHD1/IL12RB2/TRAIP/TICAM2/GFI1/VRK2/IFNAR2/CCL5/IL23R	13
1	GO:0002683	negative regulation of immune system process	9/143	144/7437	0.0017598	0.0208267	0.01782	DHX58/NLRC5/TRAFD1/IL12B/SAMHD1/CRTAM/KLRD1/PLCL2/PDCD1LG2	9
1	GO:0002449	lymphocyte mediated immunity	7/143	91/7437	0.00176696	0.0208267	0.01782	IL12B/C1R/CRTAM/EXO1/KLRD1/LIG4/C6	7
1	GO:0031341	regulation of cell killing	4/143	28/7437	0.00187424	0.02193	0.018764	IL12B/DNASE1L3/CRTAM/KLRD1	4
1	GO:0051302	regulation of cell division	6/143	69/7437	0.00201638	0.0234222	0.0200408	KIF14/ASPM/BLM/PLK4/E2F8/CDC6	6
1	GO:0040001	establishment of mitotic spindle localization	3/143	14/7437	0.00216902	0.0245093	0.0209709	NDC80/CENPA/PKHD1	3
1	GO:0042269	regulation of natural killer cell mediated cytotoxicity	3/143	14/7437	0.00216902	0.0245093	0.0209709	IL12B/CRTAM/KLRD1	3
1	GO:0051294	establishment of spindle orientation	3/143	14/7437	0.00216902	0.0245093	0.0209709	NDC80/CENPA/PKHD1	3
1	GO:0031349	positive regulation of defense response	6/143	70/7437	0.00217113	0.0245093	0.0209709	NLRC5/PARP9/IL12B/IFI35/CRTAM/KLRD1	6
1	GO:0002460	adaptive immune response based on somatic recombination of immune receptors built from immunoglobulin superfamily domains	7/143	95/7437	0.00226368	0.0253753	0.021712	IL12B/C1R/EXO1/KLRD1/LIG4/C6/IL23R	7
1	GO:0140013	meiotic nuclear division	6/143	71/7437	0.00233468	0.0259895	0.0222375	TTK/ASPM/FBXO5/BUB1B/ESPL1/CCNB2	6
1	GO:0007017	microtubule-based process	16/143	378/7437	0.00236248	0.0261177	0.0223471	KIF4A/KIF14/ASPM/CENPE/FBXO5/DLGAP5/ESPL1/TPX2/PLK4/NDC80/NEK2/CENPA/KIF22/CCNB2/PKHD1/KIF15	16
1	GO:0051784	negative regulation of nuclear division	4/143	30/7437	0.0024351	0.026736	0.0228762	TTK/FBXO5/BUB1B/NDC80	4
1	GO:0002366	leukocyte activation involved in immune response	7/143	97/7437	0.00254933	0.0277999	0.0237865	IL12B/IFI35/DNASE1L3/EXO1/PLCL2/LIG4/EOMES	7
1	GO:0002455	humoral immune response mediated by circulating immunoglobulin	3/143	15/7437	0.00267335	0.0285692	0.0244447	C1R/EXO1/C6	3
1	GO:0002715	regulation of natural killer cell mediated immunity	3/143	15/7437	0.00267335	0.0285692	0.0244447	IL12B/CRTAM/KLRD1	3
1	GO:0050691	regulation of defense response to virus by host	3/143	15/7437	0.00267335	0.0285692	0.0244447	IL12B/DTX3L/IL23R	3
1	GO:0002263	cell activation involved in immune response	7/143	98/7437	0.00270218	0.0286861	0.0245448	IL12B/IFI35/DNASE1L3/EXO1/PLCL2/LIG4/EOMES	7
1	GO:0000079	regulation of cyclin-dependent protein serine/threonine kinase activity	4/143	31/7437	0.00275462	0.0288605	0.024694	BLM/CCNB3/CCNA2/CCNB2	4
1	GO:0001909	leukocyte mediated cytotoxicity	4/143	31/7437	0.00275462	0.0288605	0.024694	IL12B/DNASE1L3/CRTAM/KLRD1	4
1	GO:0007052	mitotic spindle organization	5/143	51/7437	0.00282794	0.0294363	0.0251867	KIF4A/DLGAP5/TPX2/NDC80/NEK2	5
1	GO:0071103	DNA conformation change	6/143	74/7437	0.00288131	0.0297983	0.0254964	TOP2A/BLM/MCM4/ASF1B/MIS18A/NCAPH	6
1	GO:1904029	regulation of cyclin-dependent protein kinase activity	4/143	32/7437	0.00310175	0.0318725	0.0272711	BLM/CCNB3/CCNA2/CCNB2	4
1	GO:0001912	positive regulation of leukocyte mediated cytotoxicity	3/143	16/7437	0.00324429	0.0327081	0.0279861	IL12B/CRTAM/KLRD1	3
1	GO:0006471	protein ADP-ribosylation	3/143	16/7437	0.00324429	0.0327081	0.0279861	PARP9/PARP12/PARP15	3
1	GO:0051293	establishment of spindle localization	3/143	16/7437	0.00324429	0.0327081	0.0279861	NDC80/CENPA/PKHD1	3
1	GO:0002684	positive regulation of immune system process	13/143	286/7437	0.00332047	0.033267	0.0284643	DHX58/NLRC5/PARP9/IL12B/IFI35/C1R/CRTAM/CYRIB/KLRD1/PLCL2/PDCD1LG2/C6/IL23R	13
1	GO:0031570	DNA integrity checkpoint	5/143	53/7437	0.00335045	0.0333588	0.0285429	CLSPN/BLM/TICRR/ORC1/CDC6	5
1	GO:1901992	positive regulation of mitotic cell cycle phase transition	4/143	33/7437	0.00347759	0.034411	0.0294432	CDC25C/FBXO5/UBE2C/CDC7	4
1	GO:0071824	protein-DNA complex subunit organization	6/143	77/7437	0.00351862	0.0346033	0.0296077	CENPK/DLGAP5/MCM4/ASF1B/MIS18A/CENPA	6
1	GO:0051653	spindle localization	3/143	17/7437	0.00388448	0.0379684	0.032487	NDC80/CENPA/PKHD1	3
1	GO:0031297	replication fork processing	3/143	18/7437	0.00459634	0.0436853	0.0373786	SAMHD1/BLM/TRAIP	3
1	GO:0051642	centrosome localization	3/143	18/7437	0.00459634	0.0436853	0.0373786	ASPM/DLGAP5/PKHD1	3
1	GO:0061842	microtubule organizing center localization	3/143	18/7437	0.00459634	0.0436853	0.0373786	ASPM/DLGAP5/PKHD1	3
1	GO:0062208	positive regulation of pattern recognition receptor signaling pathway	3/143	18/7437	0.00459634	0.0436853	0.0373786	DHX58/IFI35/TICAM2	3
1	GO:0000226	microtubule cytoskeleton organization	12/143	263/7437	0.00460563	0.0436853	0.0373786	KIF4A/ASPM/FBXO5/DLGAP5/ESPL1/TPX2/PLK4/NDC80/NEK2/CENPA/CCNB2/PKHD1	12
1	GO:0034502	protein localization to chromosome	4/143	36/7437	0.00478836	0.0451514	0.038633	TTK/BUB1B/NDC80/CENPA	4
1	GO:0006310	DNA recombination	7/143	109/7437	0.00488843	0.0458254	0.0392097	SAMHD1/PARPBP/BLM/MCM4/EXO1/LIG4/CDC7	7
1	GO:0032465	regulation of cytokinesis	4/143	37/7437	0.00528988	0.0490155	0.0419393	KIF14/PLK4/E2F8/CDC6	4
1	GO:1901989	positive regulation of cell cycle phase transition	4/143	37/7437	0.00528988	0.0490155	0.0419393	CDC25C/FBXO5/UBE2C/CDC7	4
1	GO:0007080	mitotic metaphase plate congression	3/143	19/7437	0.00538207	0.0490196	0.0419428	KIF14/NDC80/KIF22	3
1	GO:0031343	positive regulation of cell killing	3/143	19/7437	0.00538207	0.0490196	0.0419428	IL12B/CRTAM/KLRD1	3
1	GO:0042267	natural killer cell mediated cytotoxicity	3/143	19/7437	0.00538207	0.0490196	0.0419428	IL12B/CRTAM/KLRD1	3
2	GO:0006955	immune response	54/227	495/7437	3.37381e-17	8.71118e-14	6.58426e-14	RSAD2/OAS3/CD274/LCP2/LY9/LOC484960/HMGB2/TCIRG1/TNFAIP3/CD40/VAV1/TNF/APBB1IP/PTK2B/MMP12/PTPRC/LOC611538/PDE4B/RAB20/IL1R1/NCKAP1L/NFKB2/IL6/CD48/PTPN2/ICAM1/DOCK2/PRKCD/IL1RN/CFP/GCH1/LIF/MYD88/ITGAM/TNFRSF1B/IL23A/OSM/RELB/CSF2/IL1A/ITGAL/CCL22/FCER1G/CYP27B1/TNFSF13B/CCRL2/SLAMF1/RIPK2/CORO1A/DDX21/CAMP/RAC2/IL7R/SASH3	54
2	GO:0045321	leukocyte activation	38/227	296/7437	1.8947e-14	1.73087e-11	1.30826e-11	RSAD2/CD274/LCP2/LY9/TCIRG1/TNFAIP3/CD40/VAV1/TNF/APBB1IP/PTK2B/LOC611538/PRDM1/NCKAP1L/IL6/PTPN2/ICAM1/DOCK2/PRKCD/PELI1/IL2RA/MYD88/ITGAM/TNFRSF1B/IL23A/HSH2D/RELB/CSF2/CEBPB/ITGAL/FCER1G/SLAMF1/RIPK2/CORO1A/RAC2/PAG1/IL7R/SASH3	38
2	GO:0001775	cell activation	40/227	329/7437	2.28181e-14	1.73087e-11	1.30826e-11	RSAD2/CD274/LCP2/LY9/TCIRG1/TNFAIP3/CD40/VAV1/TNF/APBB1IP/PTK2B/LOC611538/PRDM1/NCKAP1L/NFKB2/IL6/PTPN2/ICAM1/DOCK2/PRKCD/PELI1/UBASH3B/IL2RA/MYD88/ITGAM/TNFRSF1B/IL23A/HSH2D/RELB/CSF2/CEBPB/ITGAL/FCER1G/SLAMF1/RIPK2/CORO1A/RAC2/PAG1/IL7R/SASH3	40
2	GO:0006952	defense response	49/227	484/7437	2.68144e-14	1.73087e-11	1.30826e-11	RSAD2/OAS3/DDX60/ISG20/ACOD1/PIK3AP1/LOC484960/HMGB2/AOAH/TCIRG1/TNFAIP3/CD40/VAV1/TNF/MMP12/JAK2/LOC611538/PTAFR/RAB20/IL1R1/IL6/PTPN2/PRKCD/IL1RN/NLRP3/CFP/GCH1/IL2RA/MYD88/TNFRSF1B/IL23A/OSM/RELB/TNIP1/RAB1A/CEBPB/CD47/IL1A/CCL22/FCER1G/IL4R/CYP27B1/CCRL2/SLAMF1/RIPK2/CORO1A/CAMP/PTGS2/IL7R	49
2	GO:0002460	adaptive immune response based on somatic recombination of immune receptors built from immunoglobulin superfamily domains	22/227	95/7437	4.78347e-14	2.47018e-11	1.86706e-11	RSAD2/CD274/LY9/LOC484960/TCIRG1/TNFAIP3/CD40/TNF/IL1R1/NFKB2/IL6/ICAM1/PRKCD/MYD88/TNFRSF1B/IL23A/RELB/FCER1G/SLAMF1/RIPK2/IL7R/SASH3	22
2	GO:0002252	immune effector process	34/227	251/7437	1.08463e-13	4.66752e-11	3.5279e-11	RSAD2/OAS3/DDX60/ISG20/LY9/LOC484960/TCIRG1/CD40/VAV1/TNF/APBB1IP/PTK2B/MMP12/LOC611538/IL1R1/IL6/ICAM1/DOCK2/PRKCD/CFP/MYD88/ITGAM/TNFRSF1B/IL23A/RELB/ITGAL/FCER1G/SLAMF1/RIPK2/CORO1A/DDX21/RAC2/IL7R/SASH3	34
2	GO:0046649	lymphocyte activation	34/227	254/7437	1.54559e-13	5.25853e-11	3.97461e-11	RSAD2/CD274/LY9/TCIRG1/TNFAIP3/CD40/VAV1/APBB1IP/PTK2B/LOC611538/PRDM1/NCKAP1L/IL6/PTPN2/ICAM1/DOCK2/PRKCD/PELI1/IL2RA/MYD88/TNFRSF1B/IL23A/HSH2D/RELB/CEBPB/ITGAL/FCER1G/SLAMF1/RIPK2/CORO1A/RAC2/PAG1/IL7R/SASH3	34
2	GO:0042110	T cell activation	29/227	184/7437	1.62929e-13	5.25853e-11	3.97461e-11	RSAD2/CD274/LY9/TCIRG1/VAV1/APBB1IP/LOC611538/PRDM1/NCKAP1L/IL6/PTPN2/ICAM1/DOCK2/PELI1/IL2RA/TNFRSF1B/IL23A/HSH2D/RELB/CEBPB/ITGAL/FCER1G/SLAMF1/RIPK2/CORO1A/RAC2/PAG1/IL7R/SASH3	29
2	GO:0001816	cytokine production	34/227	262/7437	3.87074e-13	1.11047e-10	8.39339e-11	RSAD2/CD274/LY9/HMGB2/TNFAIP3/CD40/TNF/MMP12/LOC611538/PDE4B/PANX1/IL1R1/NCKAP1L/IL6/PELI1/NLRP3/CASP8/MYD88/TNFRSF1B/IL23A/OSM/IL1RAP/RELB/RAB1A/CSF2/CEBPB/FCER1G/SLAMF1/RIPK2/DDX21/IQGAP1/SULF2/MAST2/SASH3	34
2	GO:0002684	positive regulation of immune system process	35/227	286/7437	9.7539e-13	2.51846e-10	1.90355e-10	RSAD2/DDX60/CD274/LCP2/LOC484960/HMGB2/CD40/VAV1/TNF/PTK2B/MMP12/PTPRC/PDE4B/IL1R1/NCKAP1L/PTPN2/ICAM1/PELI1/CFP/CASP8/IL2RA/RIPOR2/LIF/MYD88/ITGAM/IL23A/HCLS1/FCER1G/SLAMF1/RIPK2/CORO1A/DDX21/RAC2/IL7R/SASH3	35
2	GO:0034097	response to cytokine	35/227	289/7437	1.32981e-12	3.12142e-10	2.3593e-10	CD274/TCIRG1/HAS2/CD40/TNF/PTK2B/UGCG/MMP12/JAK2/IL2RG/RAB20/IL1R1/PID1/IL6/PTPN2/ICAM1/IL1RN/IL10RB/EBI3/CASP8/GCH1/RIPOR2/MYD88/HSPA5/HCLS1/OSM/RELB/CSF2/PDE1B/CCL22/FCER1G/CYP27B1/RIPK2/CORO1A/TANK	35
2	GO:0002682	regulation of immune system process	44/227	445/7437	1.65105e-12	3.33476e-10	2.52054e-10	RSAD2/DDX60/CD274/LCP2/LOC484960/HMGB2/TNFAIP3/CD40/VAV1/TNF/PTK2B/MMP12/PTPRC/LOC611538/PRDM1/PDE4B/IL1R1/NCKAP1L/CD48/PTPN2/ICAM1/INHBA/PELI1/CFP/CASP8/UBASH3B/IL2RA/RIPOR2/LIF/MYD88/ITGAM/TNFRSF1B/IL23A/HCLS1/CEBPB/FCER1G/SLAMF1/RIPK2/CORO1A/DDX21/RAC2/PAG1/IL7R/SASH3	44
2	GO:0001817	regulation of cytokine production	33/227	260/7437	1.679e-12	3.33476e-10	2.52054e-10	RSAD2/CD274/LY9/HMGB2/TNFAIP3/CD40/TNF/MMP12/LOC611538/PDE4B/PANX1/IL1R1/NCKAP1L/PELI1/NLRP3/CASP8/MYD88/TNFRSF1B/IL23A/OSM/IL1RAP/RELB/RAB1A/CSF2/CEBPB/FCER1G/SLAMF1/RIPK2/DDX21/IQGAP1/SULF2/MAST2/SASH3	33
2	GO:0002250	adaptive immune response	23/227	124/7437	1.88176e-12	3.47051e-10	2.62315e-10	RSAD2/CD274/LY9/LOC484960/TCIRG1/TNFAIP3/CD40/TNF/IL1R1/NFKB2/IL6/CD48/ICAM1/PRKCD/MYD88/TNFRSF1B/IL23A/RELB/FCER1G/SLAMF1/RIPK2/IL7R/SASH3	23
2	GO:0001819	positive regulation of cytokine production	27/227	177/7437	2.67127e-12	4.59815e-10	3.47547e-10	RSAD2/CD274/LY9/HMGB2/CD40/TNF/MMP12/LOC611538/PDE4B/PANX1/IL1R1/PELI1/NLRP3/CASP8/MYD88/IL23A/OSM/IL1RAP/RAB1A/CSF2/CEBPB/FCER1G/SLAMF1/RIPK2/DDX21/SULF2/SASH3	27
2	GO:0006954	inflammatory response	31/227	236/7437	3.39969e-12	5.48624e-10	4.14672e-10	PIK3AP1/LOC484960/HMGB2/AOAH/TCIRG1/TNFAIP3/CD40/TNF/JAK2/PTAFR/IL1R1/IL6/PTPN2/IL1RN/NLRP3/IL2RA/MYD88/TNFRSF1B/IL23A/OSM/RELB/TNIP1/CEBPB/CD47/IL1A/CCL22/FCER1G/IL4R/CCRL2/SLAMF1/PTGS2	31
2	GO:0002520	immune system development	36/227	356/7437	1.25405e-10	1.90468e-08	1.43963e-08	RSAD2/CD274/LY9/HMGB2/TCIRG1/TNFAIP3/CD40/VAV1/TNF/PTK2B/JAK2/LOC611538/PRDM1/NCKAP1L/NFKB2/IL6/PICALM/PTPN2/DOCK2/INHBA/CASP8/UBASH3B/IL2RA/XRCC4/LIF/IL23A/HCLS1/RELB/CSF2/CEBPB/PDE1B/FCER1G/SLAMF1/RIPK2/IL7R/SASH3	36
2	GO:0002443	leukocyte mediated immunity	20/227	115/7437	1.90759e-10	2.73633e-08	2.06823e-08	RSAD2/LOC484960/TCIRG1/CD40/VAV1/TNF/IL1R1/ICAM1/PRKCD/MYD88/ITGAM/TNFRSF1B/IL23A/FCER1G/SLAMF1/CORO1A/DDX21/RAC2/IL7R/SASH3	20
2	GO:0071345	cellular response to cytokine stimulus	30/227	266/7437	3.74808e-10	5.09344e-08	3.84982e-08	TCIRG1/HAS2/CD40/TNF/PTK2B/UGCG/MMP12/JAK2/IL2RG/RAB20/IL1R1/PID1/IL6/PTPN2/ICAM1/IL1RN/IL10RB/EBI3/RIPOR2/MYD88/HSPA5/HCLS1/OSM/CSF2/PDE1B/CCL22/FCER1G/RIPK2/CORO1A/TANK	30
2	GO:0032101	regulation of response to external stimulus	32/227	307/7437	7.05e-10	8.77361e-08	6.63145e-08	DDX60/PIK3AP1/HMGB2/AOAH/TNFAIP3/VAV1/TNF/PTK2B/MMP12/JAK2/IL1R1/NCKAP1L/PTPN2/PRKCD/NLRP3/UBASH3B/IL2RA/RIPOR2/MYD88/TNFRSF1B/IL23A/OSM/TRIB1/TNIP1/CEBPB/CD47/FCER1G/CYP27B1/SLAMF1/RIPK2/RAC2/PTGS2	32
2	GO:0009607	response to biotic stimulus	38/227	416/7437	7.13578e-10	8.77361e-08	6.63145e-08	RSAD2/OAS3/DDX60/CD274/ISG20/LOC484960/HMGB2/TNFAIP3/CD40/VAV1/TNF/MMP12/LOC611538/PDE4B/RAB20/PTPN2/PRKCD/PELI1/NLRP3/CFP/GCH1/MYD88/HSPA5/IL23A/TRIB1/RELB/RAB1A/CEBPB/ABCA1/CCL22/FCER1G/CYP27B1/SLAMF1/RIPK2/CORO1A/DDX21/CAMP/IL7R	38
2	GO:0050776	regulation of immune response	27/227	225/7437	7.6536e-10	8.98254e-08	6.78937e-08	RSAD2/CD274/LCP2/LOC484960/HMGB2/TNFAIP3/CD40/VAV1/TNF/MMP12/PTPRC/LOC611538/PDE4B/IL1R1/NCKAP1L/CD48/PTPN2/CFP/ITGAM/TNFRSF1B/IL23A/FCER1G/SLAMF1/RIPK2/RAC2/IL7R/SASH3	27
2	GO:0051707	response to other organism	37/227	400/7437	8.69302e-10	9.75886e-08	7.37614e-08	RSAD2/OAS3/DDX60/CD274/ISG20/LOC484960/HMGB2/TNFAIP3/CD40/VAV1/TNF/MMP12/LOC611538/PDE4B/RAB20/PTPN2/PRKCD/PELI1/NLRP3/CFP/GCH1/MYD88/IL23A/TRIB1/RELB/RAB1A/CEBPB/ABCA1/CCL22/FCER1G/CYP27B1/SLAMF1/RIPK2/CORO1A/DDX21/CAMP/IL7R	37
2	GO:0043207	response to external biotic stimulus	37/227	401/7437	9.32755e-10	1.00349e-07	7.58477e-08	RSAD2/OAS3/DDX60/CD274/ISG20/LOC484960/HMGB2/TNFAIP3/CD40/VAV1/TNF/MMP12/LOC611538/PDE4B/RAB20/PTPN2/PRKCD/PELI1/NLRP3/CFP/GCH1/MYD88/IL23A/TRIB1/RELB/RAB1A/CEBPB/ABCA1/CCL22/FCER1G/CYP27B1/SLAMF1/RIPK2/CORO1A/DDX21/CAMP/IL7R	37
2	GO:0044419	biological process involved in interspecies interaction between organisms	41/227	482/7437	1.2042e-09	1.22647e-07	9.27012e-08	RSAD2/OAS3/DDX60/CD274/ISG20/LOC484960/HMGB2/TNFAIP3/CD40/VAV1/TNF/MMP12/LOC611538/PDE4B/RAB20/PTPN2/ICAM1/PRKCD/PELI1/NLRP3/CFP/GCH1/MYD88/CHD1/IL23A/TRIB1/RELB/TNIP1/RAB1A/CEBPB/ABCA1/CCL22/FCER1G/CYP27B1/SLAMF1/RIPK2/CORO1A/DDX21/CAMP/USF1/IL7R	41
2	GO:0002521	leukocyte differentiation	26/227	214/7437	1.23502e-09	1.22647e-07	9.27012e-08	RSAD2/LY9/TCIRG1/VAV1/TNF/PTK2B/LOC611538/PRDM1/NCKAP1L/IL6/PTPN2/DOCK2/CASP8/UBASH3B/LIF/IL23A/HCLS1/RELB/CSF2/CEBPB/PDE1B/FCER1G/SLAMF1/RIPK2/IL7R/SASH3	26
2	GO:0002449	lymphocyte mediated immunity	17/227	91/7437	1.47356e-09	1.40916e-07	1.0651e-07	RSAD2/LOC484960/TCIRG1/CD40/VAV1/TNF/IL1R1/ICAM1/PRKCD/MYD88/TNFRSF1B/IL23A/FCER1G/SLAMF1/CORO1A/IL7R/SASH3	17
2	GO:0070661	leukocyte proliferation	18/227	105/7437	2.04851e-09	1.88902e-07	1.42779e-07	CD274/TCIRG1/CD40/NCKAP1L/DOCK2/PRKCD/PELI1/IL2RA/MYD88/TNFRSF1B/IL23A/CEBPB/SLAMF1/RIPK2/CORO1A/RAC2/IL7R/SASH3	18
2	GO:0002366	leukocyte activation involved in immune response	17/227	97/7437	4.11702e-09	3.66557e-07	2.77058e-07	LY9/CD40/APBB1IP/PTK2B/LOC611538/IL6/ICAM1/DOCK2/MYD88/ITGAM/IL23A/RELB/ITGAL/FCER1G/RIPK2/CORO1A/RAC2	17
2	GO:0002263	cell activation involved in immune response	17/227	98/7437	4.84761e-09	3.88053e-07	2.93306e-07	LY9/CD40/APBB1IP/PTK2B/LOC611538/IL6/ICAM1/DOCK2/MYD88/ITGAM/IL23A/RELB/ITGAL/FCER1G/RIPK2/CORO1A/RAC2	17
2	GO:0032943	mononuclear cell proliferation	17/227	98/7437	4.84761e-09	3.88053e-07	2.93306e-07	CD274/CD40/NCKAP1L/DOCK2/PRKCD/PELI1/IL2RA/MYD88/TNFRSF1B/IL23A/CEBPB/SLAMF1/RIPK2/CORO1A/RAC2/IL7R/SASH3	17
2	GO:0046651	lymphocyte proliferation	17/227	98/7437	4.84761e-09	3.88053e-07	2.93306e-07	CD274/CD40/NCKAP1L/DOCK2/PRKCD/PELI1/IL2RA/MYD88/TNFRSF1B/IL23A/CEBPB/SLAMF1/RIPK2/CORO1A/RAC2/IL7R/SASH3	17
2	GO:0098542	defense response to other organism	30/227	296/7437	4.95962e-09	3.88053e-07	2.93306e-07	RSAD2/OAS3/DDX60/ISG20/LOC484960/HMGB2/TNFAIP3/CD40/VAV1/TNF/MMP12/LOC611538/RAB20/PTPN2/PRKCD/CFP/GCH1/MYD88/IL23A/RELB/RAB1A/CEBPB/CCL22/FCER1G/CYP27B1/SLAMF1/RIPK2/CORO1A/CAMP/IL7R	30
2	GO:0051240	positive regulation of multicellular organismal process	40/227	492/7437	7.41236e-09	5.62903e-07	4.25465e-07	RSAD2/CD274/LY9/HMGB2/HRH2/CD40/TNF/PTK2B/MMP12/TNFRSF12A/LOC611538/PDE4B/PANX1/IL1R1/NCKAP1L/INHBA/PELI1/NLRP3/CASP8/GCH1/LIF/MYD88/TNFRSF1B/IL23A/HCLS1/OSM/IL1RAP/RAB1A/CSF2/CEBPB/ABCA1/FCER1G/CYP27B1/SLAMF1/RIPK2/DDX21/PTGS2/SULF2/IL7R/SASH3	40
2	GO:0002819	regulation of adaptive immune response	14/227	66/7437	7.73168e-09	5.70377e-07	4.31114e-07	RSAD2/CD274/TNFAIP3/CD40/TNF/IL1R1/CD48/TNFRSF1B/IL23A/FCER1G/SLAMF1/RIPK2/IL7R/SASH3	14
2	GO:0007155	cell adhesion	40/227	494/7437	8.3279e-09	5.97296e-07	4.5146e-07	CD274/HAS2/VCAN/VAV1/TNF/APBB1IP/PTK2B/SULF1/MMP12/JAK2/TNFRSF12A/LOC102152131/NCKAP1L/PTPN2/ICAM1/PRKCD/PELI1/BCL2L11/PVR/ITGB2/UBASH3B/IL2RA/RIPOR2/LIF/ITGAM/IL23A/SPP1/IL1RAP/TNIP1/RAB1A/CEBPB/CD47/ITGAL/SLAMF1/RIPK2/CORO1A/RAC2/PAG1/IL7R/SASH3	40
2	GO:0022610	biological adhesion	40/227	498/7437	1.04895e-08	7.31996e-07	5.53272e-07	CD274/HAS2/VCAN/VAV1/TNF/APBB1IP/PTK2B/SULF1/MMP12/JAK2/TNFRSF12A/LOC102152131/NCKAP1L/PTPN2/ICAM1/PRKCD/PELI1/BCL2L11/PVR/ITGB2/UBASH3B/IL2RA/RIPOR2/LIF/ITGAM/IL23A/SPP1/IL1RAP/TNIP1/RAB1A/CEBPB/CD47/ITGAL/SLAMF1/RIPK2/CORO1A/RAC2/PAG1/IL7R/SASH3	40
2	GO:0007159	leukocyte cell-cell adhesion	19/227	131/7437	1.29358e-08	8.78956e-07	6.6435e-07	CD274/HAS2/TNF/NCKAP1L/PTPN2/ICAM1/PELI1/IL2RA/IL23A/TNIP1/CEBPB/ITGAL/SLAMF1/RIPK2/CORO1A/RAC2/PAG1/IL7R/SASH3	19
2	GO:0002822	regulation of adaptive immune response based on somatic recombination of immune receptors built from immunoglobulin superfamily domains	13/227	59/7437	1.65244e-08	1.094e-06	8.2689e-07	RSAD2/CD274/TNFAIP3/CD40/TNF/IL1R1/TNFRSF1B/IL23A/FCER1G/SLAMF1/RIPK2/IL7R/SASH3	13
2	GO:0048534	hematopoietic or lymphoid organ development	31/227	333/7437	2.06079e-08	1.32462e-06	1.0012e-06	RSAD2/LY9/HMGB2/TCIRG1/VAV1/TNF/PTK2B/JAK2/LOC611538/PRDM1/NCKAP1L/NFKB2/IL6/PICALM/PTPN2/DOCK2/INHBA/CASP8/UBASH3B/LIF/IL23A/HCLS1/RELB/CSF2/CEBPB/PDE1B/FCER1G/SLAMF1/RIPK2/IL7R/SASH3	31
2	GO:0050865	regulation of cell activation	23/227	195/7437	2.10339e-08	1.32462e-06	1.0012e-06	CD274/TNFAIP3/CD40/PRDM1/NCKAP1L/PTPN2/PRKCD/PELI1/UBASH3B/IL2RA/MYD88/ITGAM/TNFRSF1B/IL23A/CEBPB/FCER1G/SLAMF1/RIPK2/CORO1A/RAC2/PAG1/IL7R/SASH3	23
2	GO:0030155	regulation of cell adhesion	26/227	246/7437	2.41968e-08	1.47211e-06	1.11268e-06	CD274/HAS2/VAV1/TNF/APBB1IP/PTK2B/MMP12/JAK2/NCKAP1L/PTPN2/PRKCD/PELI1/UBASH3B/IL2RA/RIPOR2/LIF/IL23A/CEBPB/CD47/SLAMF1/RIPK2/CORO1A/RAC2/PAG1/IL7R/SASH3	26
2	GO:0030097	hemopoiesis	30/227	317/7437	2.45162e-08	1.47211e-06	1.11268e-06	RSAD2/LY9/HMGB2/TCIRG1/VAV1/TNF/PTK2B/JAK2/LOC611538/PRDM1/NCKAP1L/IL6/PICALM/PTPN2/DOCK2/INHBA/CASP8/UBASH3B/LIF/IL23A/HCLS1/RELB/CSF2/CEBPB/PDE1B/FCER1G/SLAMF1/RIPK2/IL7R/SASH3	30
2	GO:0031347	regulation of defense response	22/227	182/7437	2.76901e-08	1.6249e-06	1.22817e-06	PIK3AP1/HMGB2/AOAH/TNFAIP3/VAV1/TNF/MMP12/JAK2/IL1R1/PTPN2/NLRP3/IL2RA/MYD88/TNFRSF1B/IL23A/OSM/TNIP1/CEBPB/CD47/FCER1G/RIPK2/PTGS2	22
2	GO:0032944	regulation of mononuclear cell proliferation	14/227	75/7437	4.38637e-08	2.4004e-06	1.81432e-06	CD274/CD40/NCKAP1L/PELI1/IL2RA/MYD88/TNFRSF1B/IL23A/CEBPB/SLAMF1/RIPK2/CORO1A/RAC2/SASH3	14
2	GO:0050670	regulation of lymphocyte proliferation	14/227	75/7437	4.38637e-08	2.4004e-06	1.81432e-06	CD274/CD40/NCKAP1L/PELI1/IL2RA/MYD88/TNFRSF1B/IL23A/CEBPB/SLAMF1/RIPK2/CORO1A/RAC2/SASH3	14
2	GO:0050778	positive regulation of immune response	21/227	171/7437	4.40932e-08	2.4004e-06	1.81432e-06	RSAD2/CD274/LCP2/LOC484960/HMGB2/CD40/VAV1/TNF/MMP12/PTPRC/PDE4B/IL1R1/NCKAP1L/PTPN2/CFP/ITGAM/IL23A/FCER1G/SLAMF1/RIPK2/SASH3	21
2	GO:0050727	regulation of inflammatory response	17/227	113/7437	4.46239e-08	2.4004e-06	1.81432e-06	PIK3AP1/AOAH/TNFAIP3/TNF/JAK2/IL1R1/PTPN2/NLRP3/IL2RA/MYD88/TNFRSF1B/OSM/TNIP1/CEBPB/CD47/FCER1G/PTGS2	17
2	GO:0097696	receptor signaling pathway via STAT	12/227	54/7437	5.40191e-08	2.79612e-06	2.11342e-06	CD40/PTK2B/SOCS3/JAK2/IL6/PTPN2/LIF/IL23A/HCLS1/OSM/CSF2/IL7R	12
2	GO:1903131	mononuclear cell differentiation	21/227	173/7437	5.41464e-08	2.79612e-06	2.11342e-06	RSAD2/LY9/TCIRG1/VAV1/PTK2B/LOC611538/PRDM1/NCKAP1L/IL6/PTPN2/DOCK2/IL23A/RELB/CSF2/CEBPB/PDE1B/FCER1G/SLAMF1/RIPK2/IL7R/SASH3	21
2	GO:0010628	positive regulation of gene expression	31/227	353/7437	8.00253e-08	4.05148e-06	3.06227e-06	RSAD2/CD274/LY9/HMGB2/CD40/TNF/FGF23/MMP12/LOC611538/PRDM1/PDE4B/PANX1/IL1R1/PELI1/NLRP3/CASP8/MYD88/IL23A/OSM/IL1RAP/RELB/RAB1A/CSF2/CEBPB/FCER1G/SLAMF1/RIPK2/DDX21/SULF2/IL7R/SASH3	31
2	GO:0070663	regulation of leukocyte proliferation	14/227	79/7437	8.73334e-08	4.26685e-06	3.22505e-06	CD274/CD40/NCKAP1L/PELI1/IL2RA/MYD88/TNFRSF1B/IL23A/CEBPB/SLAMF1/RIPK2/CORO1A/RAC2/SASH3	14
2	GO:0008284	positive regulation of cell population proliferation	28/227	298/7437	8.75844e-08	4.26685e-06	3.22505e-06	CD274/HMGB2/HAS2/TNFAIP3/CD40/TNF/FGF23/PTK2B/SULF1/MMP12/AREG/NCKAP1L/PID1/PELI1/IL2RA/LIF/MYD88/IL23A/HCLS1/OSM/CSF2/HBEGF/SLAMF1/RIPK2/CORO1A/RAC2/IL7R/SASH3	28
2	GO:0002694	regulation of leukocyte activation	21/227	178/7437	8.92473e-08	4.26734e-06	3.22543e-06	CD274/TNFAIP3/CD40/PRDM1/NCKAP1L/PTPN2/PELI1/IL2RA/MYD88/ITGAM/TNFRSF1B/IL23A/CEBPB/FCER1G/SLAMF1/RIPK2/CORO1A/RAC2/PAG1/IL7R/SASH3	21
2	GO:0018108	peptidyl-tyrosine phosphorylation	15/227	92/7437	9.51889e-08	4.46869e-06	3.37761e-06	CD40/PTK2B/JAK2/PTPN1/PTPRC/AREG/PTPN2/PRKCD/LIF/IL23A/HCLS1/OSM/CSF2/HBEGF/RIPK2	15
2	GO:0002699	positive regulation of immune effector process	14/227	80/7437	1.03026e-07	4.75022e-06	3.59041e-06	RSAD2/DDX60/CD40/VAV1/TNF/IL1R1/ITGAM/IL23A/FCER1G/SLAMF1/RIPK2/DDX21/RAC2/SASH3	14
2	GO:0002703	regulation of leukocyte mediated immunity	14/227	81/7437	1.2122e-07	5.49107e-06	4.15037e-06	RSAD2/CD40/VAV1/TNF/IL1R1/ITGAM/TNFRSF1B/IL23A/FCER1G/SLAMF1/DDX21/RAC2/IL7R/SASH3	14
2	GO:0018212	peptidyl-tyrosine modification	15/227	94/7437	1.27906e-07	5.6293e-06	4.25485e-06	CD40/PTK2B/JAK2/PTPN1/PTPRC/AREG/PTPN2/PRKCD/LIF/IL23A/HCLS1/OSM/CSF2/HBEGF/RIPK2	15
2	GO:0035710	CD4-positive, alpha-beta T cell activation	10/227	38/7437	1.28632e-07	5.6293e-06	4.25485e-06	RSAD2/CD274/LY9/TCIRG1/NCKAP1L/IL6/IL23A/RELB/RIPK2/SASH3	10
2	GO:0006909	phagocytosis	14/227	82/7437	1.42266e-07	6.089e-06	4.60231e-06	VAV1/TNF/IL2RG/RAB20/NCKAP1L/DOCK2/ITGB2/NCF2/MYD88/CD47/ABCA1/FCER1G/CORO1A/RAC2	14
2	GO:0002285	lymphocyte activation involved in immune response	13/227	70/7437	1.43853e-07	6.089e-06	4.60231e-06	LY9/CD40/APBB1IP/PTK2B/LOC611538/IL6/ICAM1/IL23A/RELB/ITGAL/FCER1G/RIPK2/CORO1A	13
2	GO:0002824	positive regulation of adaptive immune response based on somatic recombination of immune receptors built from immunoglobulin superfamily domains	10/227	39/7437	1.68409e-07	6.90555e-06	5.21949e-06	RSAD2/CD274/CD40/TNF/IL1R1/IL23A/FCER1G/SLAMF1/RIPK2/SASH3	10
2	GO:0030099	myeloid cell differentiation	18/227	138/7437	1.68493e-07	6.90555e-06	5.21949e-06	HMGB2/TCIRG1/TNF/PTK2B/JAK2/NCKAP1L/PTPN2/INHBA/CASP8/UBASH3B/LIF/IL23A/HCLS1/RELB/CSF2/CEBPB/PDE1B/FCER1G	18
2	GO:0042098	T cell proliferation	13/227	71/7437	1.71391e-07	6.91456e-06	5.2263e-06	CD274/NCKAP1L/DOCK2/PELI1/IL2RA/TNFRSF1B/IL23A/CEBPB/SLAMF1/RIPK2/CORO1A/RAC2/SASH3	13
2	GO:0042129	regulation of T cell proliferation	12/227	60/7437	1.8739e-07	7.44372e-06	5.62626e-06	CD274/NCKAP1L/PELI1/IL2RA/TNFRSF1B/IL23A/CEBPB/SLAMF1/RIPK2/CORO1A/RAC2/SASH3	12
2	GO:0009617	response to bacterium	21/227	186/7437	1.91042e-07	7.47378e-06	5.64898e-06	CD274/HMGB2/TNFAIP3/TNF/LOC611538/PDE4B/PRKCD/PELI1/NLRP3/GCH1/MYD88/IL23A/TRIB1/RAB1A/CEBPB/ABCA1/FCER1G/CYP27B1/RIPK2/CAMP/IL7R	21
2	GO:0050730	regulation of peptidyl-tyrosine phosphorylation	14/227	84/7437	1.94515e-07	7.49608e-06	5.66584e-06	CD40/PTK2B/PTPN1/PTPRC/AREG/PTPN2/PRKCD/LIF/IL23A/HCLS1/OSM/CSF2/HBEGF/RIPK2	14
2	GO:0030217	T cell differentiation	16/227	113/7437	2.67294e-07	9.95541e-06	7.5247e-06	RSAD2/LY9/TCIRG1/VAV1/LOC611538/PRDM1/NCKAP1L/IL6/PTPN2/DOCK2/IL23A/RELB/FCER1G/RIPK2/IL7R/SASH3	16
2	GO:0002705	positive regulation of leukocyte mediated immunity	11/227	51/7437	2.73106e-07	9.95541e-06	7.5247e-06	RSAD2/CD40/VAV1/TNF/IL1R1/ITGAM/IL23A/FCER1G/SLAMF1/DDX21/SASH3	11
2	GO:0050731	positive regulation of peptidyl-tyrosine phosphorylation	12/227	62/7437	2.74053e-07	9.95541e-06	7.5247e-06	CD40/PTK2B/PTPN1/PTPRC/AREG/LIF/IL23A/HCLS1/OSM/CSF2/HBEGF/RIPK2	12
2	GO:0051249	regulation of lymphocyte activation	19/227	158/7437	2.79128e-07	9.95541e-06	7.5247e-06	CD274/TNFAIP3/CD40/PRDM1/NCKAP1L/PTPN2/PELI1/IL2RA/MYD88/TNFRSF1B/IL23A/CEBPB/SLAMF1/RIPK2/CORO1A/RAC2/PAG1/IL7R/SASH3	19
2	GO:0002286	T cell activation involved in immune response	10/227	41/7437	2.81466e-07	9.95541e-06	7.5247e-06	LY9/APBB1IP/LOC611538/IL6/ICAM1/IL23A/RELB/ITGAL/FCER1G/RIPK2	10
2	GO:0002821	positive regulation of adaptive immune response	10/227	41/7437	2.81466e-07	9.95541e-06	7.5247e-06	RSAD2/CD274/CD40/TNF/IL1R1/IL23A/FCER1G/SLAMF1/RIPK2/SASH3	10
2	GO:0046631	alpha-beta T cell activation	12/227	63/7437	3.29512e-07	1.1455e-05	8.65818e-06	RSAD2/CD274/LY9/TCIRG1/PRDM1/NCKAP1L/IL6/DOCK2/IL23A/RELB/RIPK2/SASH3	12
2	GO:0032946	positive regulation of mononuclear cell proliferation	11/227	52/7437	3.37174e-07	1.1455e-05	8.65818e-06	CD274/CD40/NCKAP1L/PELI1/IL2RA/MYD88/IL23A/SLAMF1/RIPK2/CORO1A/SASH3	11
2	GO:0050671	positive regulation of lymphocyte proliferation	11/227	52/7437	3.37174e-07	1.1455e-05	8.65818e-06	CD274/CD40/NCKAP1L/PELI1/IL2RA/MYD88/IL23A/SLAMF1/RIPK2/CORO1A/SASH3	11
2	GO:0022407	regulation of cell-cell adhesion	18/227	147/7437	4.42998e-07	1.48548e-05	1.12279e-05	CD274/HAS2/TNF/NCKAP1L/PTPN2/PRKCD/PELI1/UBASH3B/IL2RA/IL23A/CEBPB/CD47/SLAMF1/RIPK2/CORO1A/PAG1/IL7R/SASH3	18
2	GO:0032103	positive regulation of response to external stimulus	17/227	132/7437	4.5247e-07	1.49779e-05	1.13209e-05	DDX60/HMGB2/VAV1/TNF/PTK2B/MMP12/NCKAP1L/RIPOR2/IL23A/OSM/CEBPB/CD47/FCER1G/SLAMF1/RIPK2/RAC2/PTGS2	17
2	GO:0002573	myeloid leukocyte differentiation	13/227	77/7437	4.60722e-07	1.5058e-05	1.13815e-05	TCIRG1/TNF/PTPN2/CASP8/UBASH3B/LIF/IL23A/HCLS1/RELB/CSF2/CEBPB/PDE1B/FCER1G	13
2	GO:0032496	response to lipopolysaccharide	14/227	91/7437	5.41493e-07	1.74767e-05	1.32096e-05	CD274/HMGB2/TNFAIP3/TNF/PDE4B/PELI1/NLRP3/GCH1/MYD88/TRIB1/CEBPB/ABCA1/CYP27B1/RIPK2	14
2	GO:0050863	regulation of T cell activation	16/227	119/7437	5.51137e-07	1.75684e-05	1.32789e-05	CD274/PRDM1/NCKAP1L/PTPN2/PELI1/IL2RA/TNFRSF1B/IL23A/CEBPB/SLAMF1/RIPK2/CORO1A/RAC2/PAG1/IL7R/SASH3	16
2	GO:0070665	positive regulation of leukocyte proliferation	11/227	55/7437	6.16073e-07	1.93988e-05	1.46624e-05	CD274/CD40/NCKAP1L/PELI1/IL2RA/MYD88/IL23A/SLAMF1/RIPK2/CORO1A/SASH3	11
2	GO:0050900	leukocyte migration	17/227	136/7437	6.96851e-07	2.16779e-05	1.6385e-05	VAV1/TNF/PTK2B/PDE4B/IL1R1/NCKAP1L/ICAM1/RIPOR2/MMP9/MYD88/IL23A/ITGAL/CCL22/FCER1G/SLAMF1/CORO1A/RAC2	17
2	GO:0030098	lymphocyte differentiation	18/227	152/7437	7.32831e-07	2.25258e-05	1.70259e-05	RSAD2/LY9/TCIRG1/VAV1/PTK2B/LOC611538/PRDM1/NCKAP1L/IL6/PTPN2/DOCK2/IL23A/RELB/FCER1G/SLAMF1/RIPK2/IL7R/SASH3	18
2	GO:0007260	tyrosine phosphorylation of STAT protein	8/227	27/7437	8.95784e-07	2.72108e-05	2.0567e-05	CD40/JAK2/PTPN2/LIF/IL23A/HCLS1/OSM/CSF2	8
2	GO:0097530	granulocyte migration	11/227	58/7437	1.08139e-06	3.24669e-05	2.45398e-05	VAV1/PDE4B/IL1R1/NCKAP1L/RIPOR2/MYD88/IL23A/CCL22/FCER1G/SLAMF1/RAC2	11
2	GO:1990266	neutrophil migration	10/227	47/7437	1.10685e-06	3.28493e-05	2.48288e-05	VAV1/PDE4B/IL1R1/NCKAP1L/RIPOR2/MYD88/IL23A/CCL22/FCER1G/RAC2	10
2	GO:0002697	regulation of immune effector process	17/227	141/7437	1.16799e-06	3.42699e-05	2.59026e-05	RSAD2/DDX60/CD40/VAV1/TNF/MMP12/IL1R1/ITGAM/TNFRSF1B/IL23A/FCER1G/SLAMF1/RIPK2/DDX21/RAC2/IL7R/SASH3	17
2	GO:0002237	response to molecule of bacterial origin	14/227	97/7437	1.20482e-06	3.49532e-05	2.6419e-05	CD274/HMGB2/TNFAIP3/TNF/PDE4B/PELI1/NLRP3/GCH1/MYD88/TRIB1/CEBPB/ABCA1/CYP27B1/RIPK2	14
2	GO:1903037	regulation of leukocyte cell-cell adhesion	15/227	115/7437	1.86518e-06	5.35099e-05	4.04449e-05	CD274/HAS2/TNF/NCKAP1L/PTPN2/PELI1/IL2RA/IL23A/CEBPB/SLAMF1/RIPK2/CORO1A/PAG1/IL7R/SASH3	15
2	GO:0045087	innate immune response	21/227	214/7437	1.9898e-06	5.6458e-05	4.26732e-05	OAS3/LOC484960/HMGB2/TNFAIP3/CD40/VAV1/MMP12/LOC611538/RAB20/PTPN2/CFP/GCH1/MYD88/RELB/CCL22/FCER1G/CYP27B1/SLAMF1/RIPK2/CORO1A/CAMP	21
2	GO:0007259	receptor signaling pathway via JAK-STAT	10/227	51/7437	2.45377e-06	6.88657e-05	5.20514e-05	CD40/PTK2B/SOCS3/JAK2/PTPN2/LIF/IL23A/HCLS1/OSM/CSF2	10
2	GO:0043067	regulation of programmed cell death	34/227	477/7437	2.5323e-06	7.02212e-05	5.3076e-05	CD274/ASNS/BIRC3/HMGB2/ALDH1A3/TNFAIP3/CD40/TNF/PTK2B/SOCS3/JAK2/TNFRSF12A/PTPN1/SERPINB2/NCKAP1L/PTPN2/ICAM1/PRKCD/INHBA/PELI1/BCL2L11/CASP8/HSPA5/HCLS1/HSH2D/CSF2/CEBPB/FCER1G/RIPK2/CORO1A/CDKN2D/PTGS2/ATF3/IL7R	34
2	GO:0002706	regulation of lymphocyte mediated immunity	11/227	63/7437	2.55646e-06	7.02212e-05	5.3076e-05	RSAD2/CD40/VAV1/TNF/IL1R1/TNFRSF1B/IL23A/FCER1G/SLAMF1/IL7R/SASH3	11
2	GO:0045637	regulation of myeloid cell differentiation	12/227	76/7437	2.69676e-06	7.32951e-05	5.53994e-05	HMGB2/TNF/PTK2B/NCKAP1L/PTPN2/INHBA/CASP8/UBASH3B/LIF/IL23A/HCLS1/CEBPB	12
2	GO:0019221	cytokine-mediated signaling pathway	17/227	151/7437	3.05726e-06	8.22276e-05	6.21509e-05	TNF/PTK2B/UGCG/MMP12/JAK2/IL2RG/IL1R1/IL6/PTPN2/IL1RN/IL10RB/EBI3/MYD88/OSM/CCL22/FCER1G/RIPK2	17
2	GO:0048872	homeostasis of number of cells	14/227	105/7437	3.18214e-06	8.47039e-05	6.40226e-05	HMGB2/TCIRG1/TNFAIP3/JAK2/PDE4B/NCKAP1L/PTPN2/INHBA/IL2RA/HCLS1/FCER1G/CORO1A/IL7R/SASH3	14
2	GO:0042981	regulation of apoptotic process	33/227	465/7437	3.9889e-06	0.000105095	7.94352e-05	CD274/ASNS/BIRC3/HMGB2/ALDH1A3/TNFAIP3/CD40/TNF/PTK2B/SOCS3/JAK2/TNFRSF12A/PTPN1/SERPINB2/NCKAP1L/PTPN2/ICAM1/PRKCD/INHBA/BCL2L11/CASP8/HSPA5/HCLS1/HSH2D/CSF2/CEBPB/FCER1G/RIPK2/CORO1A/CDKN2D/PTGS2/ATF3/IL7R	33
2	GO:0098609	cell-cell adhesion	24/227	281/7437	4.30573e-06	0.000112297	8.48784e-05	CD274/HAS2/TNF/NCKAP1L/PTPN2/ICAM1/PRKCD/PELI1/PVR/UBASH3B/IL2RA/IL23A/IL1RAP/TNIP1/CEBPB/CD47/ITGAL/SLAMF1/RIPK2/CORO1A/RAC2/PAG1/IL7R/SASH3	24
2	GO:0002708	positive regulation of lymphocyte mediated immunity	9/227	43/7437	4.47769e-06	0.000115096	8.69939e-05	RSAD2/CD40/VAV1/TNF/IL1R1/IL23A/FCER1G/SLAMF1/SASH3	9
2	GO:1903706	regulation of hemopoiesis	16/227	139/7437	4.50219e-06	0.000115096	8.69939e-05	HMGB2/TNF/PTK2B/PRDM1/NCKAP1L/PTPN2/INHBA/CASP8/UBASH3B/LIF/IL23A/HCLS1/CEBPB/RIPK2/IL7R/SASH3	16
2	GO:0043367	CD4-positive, alpha-beta T cell differentiation	8/227	33/7437	4.78096e-06	0.000120728	9.12509e-05	RSAD2/LY9/NCKAP1L/IL6/IL23A/RELB/RIPK2/SASH3	8
2	GO:0032270	positive regulation of cellular protein metabolic process	34/227	491/7437	4.81602e-06	0.000120728	9.12509e-05	LCP2/BIRC3/TNFAIP3/CD40/TNF/FGF23/PTK2B/TRIB3/PTPN1/PTPRC/AREG/FGD2/PSME2/PICALM/PRKCD/INHBA/PELI1/NLRP3/CASP8/LIF/HSPA5/TNFRSF1B/IL23A/PIK3R5/HCLS1/OSM/TRIB1/TNIP1/CSF2/HBEGF/RIPK2/GNL3/PTGS2/TANK	34
2	GO:0045785	positive regulation of cell adhesion	17/227	157/7437	5.2278e-06	0.00012979	9.81006e-05	CD274/HAS2/VAV1/TNF/APBB1IP/PTK2B/JAK2/NCKAP1L/IL2RA/LIF/IL23A/CD47/SLAMF1/RIPK2/CORO1A/IL7R/SASH3	17
2	GO:0032770	positive regulation of monooxygenase activity	5/227	10/7437	5.63893e-06	0.000138664	0.000104808	TNF/FGF23/PTK2B/GCH1/CYP27B1	5
2	GO:0097529	myeloid leukocyte migration	12/227	82/7437	6.12565e-06	0.000149212	0.00011278	VAV1/PTK2B/PDE4B/IL1R1/NCKAP1L/RIPOR2/MYD88/IL23A/CCL22/FCER1G/SLAMF1/RAC2	12
2	GO:0042509	regulation of tyrosine phosphorylation of STAT protein	7/227	25/7437	6.76524e-06	0.000163251	0.000123392	CD40/PTPN2/LIF/IL23A/HCLS1/OSM/CSF2	7
2	GO:0042742	defense response to bacterium	12/227	83/7437	6.97042e-06	0.000166645	0.000125957	HMGB2/TNF/LOC611538/PRKCD/MYD88/IL23A/RAB1A/CEBPB/FCER1G/RIPK2/CAMP/IL7R	12
2	GO:0010648	negative regulation of cell communication	32/227	459/7437	8.2466e-06	0.000195346	0.00014765	HMGB2/TNFAIP3/TNF/SULF1/SOCS3/MMP12/PTPN1/PDE4B/PID1/PTPN2/ICAM1/PRKCD/RASA3/IL1RN/NLRP3/DUSP5/CASP8/UBASH3B/CISH/RIPOR2/LIF/HSPA5/OSM/TRIB1/TNIP1/CSF2/RAP1B/CDKN2D/PTGS2/ATF3/TANK/SULF2	32
2	GO:0002696	positive regulation of leukocyte activation	14/227	114/7437	8.49664e-06	0.000199439	0.000150744	CD274/CD40/NCKAP1L/PELI1/IL2RA/MYD88/ITGAM/IL23A/FCER1G/SLAMF1/RIPK2/CORO1A/IL7R/SASH3	14
2	GO:0023057	negative regulation of signaling	32/227	461/7437	9.02444e-06	0.00020992	0.000158666	HMGB2/TNFAIP3/TNF/SULF1/SOCS3/MMP12/PTPN1/PDE4B/PID1/PTPN2/ICAM1/PRKCD/RASA3/IL1RN/NLRP3/DUSP5/CASP8/UBASH3B/CISH/RIPOR2/LIF/HSPA5/OSM/TRIB1/TNIP1/CSF2/RAP1B/CDKN2D/PTGS2/ATF3/TANK/SULF2	32
2	GO:1901701	cellular response to oxygen-containing compound	27/227	356/7437	9.91067e-06	0.000228476	0.000172691	CD274/HMGB2/TNFAIP3/TNF/PTK2B/JAK2/TRIB3/PTPN1/SLC39A14/RAB31/PDE4B/PID1/PTPN2/ICAM1/PRKCD/NLRP3/GCH1/MYD88/SPP1/TRIB1/CEBPB/ABCA1/RAP1B/CYP27B1/RIPK2/USF1/AANAT	27
2	GO:0043069	negative regulation of programmed cell death	24/227	298/7437	1.17933e-05	0.000269471	0.000203677	ASNS/BIRC3/HMGB2/TNFAIP3/TNF/PTK2B/SOCS3/PTPN1/SERPINB2/NCKAP1L/ICAM1/PRKCD/PELI1/CASP8/HSPA5/HCLS1/HSH2D/CSF2/CEBPB/FCER1G/CORO1A/CDKN2D/PTGS2/IL7R	24
2	GO:0050867	positive regulation of cell activation	14/227	118/7437	1.27241e-05	0.000287284	0.00021714	CD274/CD40/NCKAP1L/PELI1/IL2RA/MYD88/ITGAM/IL23A/FCER1G/SLAMF1/RIPK2/CORO1A/IL7R/SASH3	14
2	GO:0031401	positive regulation of protein modification process	27/227	361/7437	1.27954e-05	0.000287284	0.00021714	LCP2/BIRC3/CD40/TNF/FGF23/PTK2B/TRIB3/PTPN1/PTPRC/AREG/FGD2/PRKCD/INHBA/PELI1/LIF/HSPA5/IL23A/PIK3R5/HCLS1/OSM/TNIP1/CSF2/HBEGF/RIPK2/GNL3/PTGS2/TANK	27
2	GO:0046632	alpha-beta T cell differentiation	9/227	49/7437	1.3907e-05	0.000309532	0.000233956	RSAD2/LY9/PRDM1/NCKAP1L/IL6/IL23A/RELB/RIPK2/SASH3	9
2	GO:0009719	response to endogenous stimulus	32/227	471/7437	1.4026e-05	0.000309532	0.000233956	HMGB2/HAS2/TNF/FGF23/SULF1/UGCG/JAK2/TRIB3/PTPN1/SLC39A14/RAB31/PDE4B/PID1/HIVEP1/PTPN2/ICAM1/PRKCD/EBI3/MTMR4/MYD88/HSPA5/HCLS1/CEBPB/RAP1B/FCER1G/CYP27B1/RIPK2/CORO1A/USF1/IQGAP1/SULF2/AANAT	32
2	GO:0071216	cellular response to biotic stimulus	11/227	75/7437	1.47285e-05	0.00032228	0.000243592	CD274/HMGB2/TNFAIP3/TNF/PDE4B/NLRP3/MYD88/HSPA5/TRIB1/ABCA1/RIPK2	11
2	GO:0060548	negative regulation of cell death	25/227	323/7437	1.53027e-05	0.000330982	0.000250169	ASNS/BIRC3/HMGB2/TNFAIP3/TNF/PTK2B/SOCS3/PTPN1/SERPINB2/NCKAP1L/ICAM1/PRKCD/PELI1/CASP8/HSPA5/TNFRSF1B/HCLS1/HSH2D/CSF2/CEBPB/FCER1G/CORO1A/CDKN2D/PTGS2/IL7R	25
2	GO:0002274	myeloid leukocyte activation	10/227	62/7437	1.53826e-05	0.000330982	0.000250169	LCP2/TNF/DOCK2/PRKCD/MYD88/ITGAM/RELB/CSF2/FCER1G/RAC2	10
2	GO:0071621	granulocyte chemotaxis	9/227	50/7437	1.65149e-05	0.00035241	0.000266365	VAV1/PDE4B/NCKAP1L/RIPOR2/IL23A/CCL22/FCER1G/SLAMF1/RAC2	9
2	GO:0009968	negative regulation of signal transduction	30/227	433/7437	1.83904e-05	0.000389214	0.000294184	HMGB2/TNFAIP3/TNF/SULF1/SOCS3/MMP12/PTPN1/PDE4B/PID1/PTPN2/ICAM1/PRKCD/RASA3/IL1RN/NLRP3/DUSP5/CASP8/UBASH3B/CISH/RIPOR2/LIF/HSPA5/TRIB1/TNIP1/CSF2/CDKN2D/PTGS2/ATF3/TANK/SULF2	30
2	GO:0060326	cell chemotaxis	14/227	122/7437	1.87135e-05	0.000392831	0.000296917	HMGB2/VAV1/PTK2B/PDE4B/NCKAP1L/PRKCD/RIPOR2/IL23A/CCL22/FCER1G/CCRL2/SLAMF1/CORO1A/RAC2	14
2	GO:0033993	response to lipid	19/227	210/7437	2.01674e-05	0.000419937	0.000317405	CD274/HMGB2/TNFAIP3/TNF/PTK2B/PDE4B/PID1/PELI1/NLRP3/GCH1/CYP24A1/MYD88/SPP1/TRIB1/CEBPB/ABCA1/CYP27B1/RIPK2/CDKN2D	19
2	GO:0042531	positive regulation of tyrosine phosphorylation of STAT protein	6/227	20/7437	2.04903e-05	0.000420966	0.000318183	CD40/LIF/IL23A/HCLS1/OSM/CSF2	6
2	GO:0071222	cellular response to lipopolysaccharide	10/227	64/7437	2.05429e-05	0.000420966	0.000318183	CD274/HMGB2/TNFAIP3/TNF/PDE4B/NLRP3/MYD88/TRIB1/ABCA1/RIPK2	10
2	GO:1901700	response to oxygen-containing compound	31/227	459/7437	2.18061e-05	0.00043068	0.000325525	CD274/HMGB2/TNFAIP3/TNF/PTK2B/JAK2/TRIB3/PTPN1/SLC39A14/RAB31/PDE4B/PANX1/PID1/PTPN2/ICAM1/PRKCD/PELI1/NLRP3/GCH1/CYP24A1/MYD88/SPP1/TRIB1/CEBPB/ABCA1/RAP1B/CYP27B1/RIPK2/CDKN2D/USF1/AANAT	31
2	GO:0002367	cytokine production involved in immune response	8/227	40/7437	2.20177e-05	0.00043068	0.000325525	RSAD2/TNF/IL1R1/TNFRSF1B/FCER1G/SLAMF1/DDX21/SASH3	8
2	GO:0002718	regulation of cytokine production involved in immune response	8/227	40/7437	2.20177e-05	0.00043068	0.000325525	RSAD2/TNF/IL1R1/TNFRSF1B/FCER1G/SLAMF1/DDX21/SASH3	8
2	GO:0030593	neutrophil chemotaxis	8/227	40/7437	2.20177e-05	0.00043068	0.000325525	VAV1/PDE4B/NCKAP1L/RIPOR2/IL23A/CCL22/FCER1G/RAC2	8
2	GO:0045639	positive regulation of myeloid cell differentiation	8/227	40/7437	2.20177e-05	0.00043068	0.000325525	HMGB2/TNF/NCKAP1L/INHBA/CASP8/LIF/IL23A/HCLS1	8
2	GO:0070555	response to interleukin-1	8/227	40/7437	2.20177e-05	0.00043068	0.000325525	HAS2/CD40/IL1R1/IL1RN/MYD88/CCL22/RIPK2/TANK	8
2	GO:1902105	regulation of leukocyte differentiation	13/227	108/7437	2.23256e-05	0.000433418	0.000327595	TNF/PRDM1/NCKAP1L/PTPN2/CASP8/UBASH3B/LIF/IL23A/HCLS1/CEBPB/RIPK2/IL7R/SASH3	13
2	GO:0034612	response to tumor necrosis factor	11/227	79/7437	2.4406e-05	0.00047027	0.000355449	HAS2/CD40/TNF/PTK2B/JAK2/PID1/PTPN2/CASP8/GCH1/CCL22/TANK	11
2	GO:0022409	positive regulation of cell-cell adhesion	12/227	94/7437	2.55501e-05	0.00048867	0.000369356	CD274/HAS2/TNF/NCKAP1L/IL2RA/IL23A/CD47/SLAMF1/RIPK2/CORO1A/IL7R/SASH3	12
2	GO:0002456	T cell mediated immunity	8/227	41/7437	2.66441e-05	0.000503376	0.000380472	RSAD2/IL1R1/ICAM1/TNFRSF1B/IL23A/SLAMF1/IL7R/SASH3	8
2	GO:0007584	response to nutrient	5/227	13/7437	2.6709e-05	0.000503376	0.000380472	CYP24A1/SPP1/CYP27B1/CDKN2D/USF1	5
2	GO:0071219	cellular response to molecule of bacterial origin	10/227	66/7437	2.71242e-05	0.000507497	0.000383587	CD274/HMGB2/TNFAIP3/TNF/PDE4B/NLRP3/MYD88/TRIB1/ABCA1/RIPK2	10
2	GO:1902622	regulation of neutrophil migration	6/227	21/7437	2.79597e-05	0.000519367	0.000392558	IL1R1/NCKAP1L/RIPOR2/MYD88/IL23A/RAC2	6
2	GO:0080134	regulation of response to stress	29/227	422/7437	2.9919e-05	0.000551792	0.000417066	PIK3AP1/HMGB2/AOAH/TNFAIP3/VAV1/TNF/PTK2B/MMP12/JAK2/PTPN1/PCNA/IL1R1/PTPN2/PRKCD/NLRP3/GCH1/UBASH3B/IL2RA/MYD88/TNFRSF1B/IL23A/OSM/TNIP1/CEBPB/CD47/FCER1G/RIPK2/CDKN2D/PTGS2	29
2	GO:0002292	T cell differentiation involved in immune response	7/227	31/7437	3.16486e-05	0.00056694	0.000428516	LY9/LOC611538/IL6/IL23A/RELB/FCER1G/RIPK2	7
2	GO:0032729	positive regulation of interferon-gamma production	7/227	31/7437	3.16486e-05	0.00056694	0.000428516	TNF/PDE4B/IL1R1/IL23A/SLAMF1/RIPK2/SASH3	7
2	GO:0002761	regulation of myeloid leukocyte differentiation	8/227	42/7437	3.20578e-05	0.00056694	0.000428516	TNF/PTPN2/CASP8/UBASH3B/LIF/IL23A/HCLS1/CEBPB	8
2	GO:0032609	interferon-gamma production	8/227	42/7437	3.20578e-05	0.00056694	0.000428516	CD274/TNF/PDE4B/IL1R1/IL23A/SLAMF1/RIPK2/SASH3	8
2	GO:0032649	regulation of interferon-gamma production	8/227	42/7437	3.20578e-05	0.00056694	0.000428516	CD274/TNF/PDE4B/IL1R1/IL23A/SLAMF1/RIPK2/SASH3	8
2	GO:0042102	positive regulation of T cell proliferation	8/227	42/7437	3.20578e-05	0.00056694	0.000428516	CD274/NCKAP1L/IL2RA/IL23A/SLAMF1/RIPK2/CORO1A/SASH3	8
2	GO:0050766	positive regulation of phagocytosis	6/227	22/7437	3.74712e-05	0.000658168	0.000497469	TNF/IL2RG/NCKAP1L/DOCK2/CD47/FCER1G	6
2	GO:1903039	positive regulation of leukocyte cell-cell adhesion	11/227	83/7437	3.91562e-05	0.000683117	0.000516327	CD274/HAS2/TNF/NCKAP1L/IL2RA/IL23A/SLAMF1/RIPK2/CORO1A/IL7R/SASH3	11
2	GO:0002221	pattern recognition receptor signaling pathway	10/227	69/7437	4.0349e-05	0.000688278	0.000520228	RSAD2/DDX60/PIK3AP1/TNFAIP3/CD40/LOC611538/PELI1/MYD88/TNIP1/RIPK2	10
2	GO:0032768	regulation of monooxygenase activity	5/227	14/7437	4.05183e-05	0.000688278	0.000520228	TNF/FGF23/PTK2B/GCH1/CYP27B1	5
2	GO:0042088	T-helper 1 type immune response	5/227	14/7437	4.05183e-05	0.000688278	0.000520228	IL1R1/IL23A/RELB/SLAMF1/RIPK2	5
2	GO:1902624	positive regulation of neutrophil migration	5/227	14/7437	4.05183e-05	0.000688278	0.000520228	IL1R1/NCKAP1L/RIPOR2/IL23A/RAC2	5
2	GO:1901698	response to nitrogen compound	24/227	323/7437	4.45806e-05	0.000752334	0.000568644	TNFAIP3/TNF/JAK2/TRIB3/PTPN1/SLC39A14/RAB31/PDE4B/PANX1/PID1/PTPN2/ICAM1/PRKCD/PELI1/MYD88/HSPA5/CEBPB/PDE1B/RAP1B/FCER1G/RIPK2/DDX21/USF1/AANAT	24
2	GO:0031349	positive regulation of defense response	10/227	70/7437	4.58335e-05	0.000768455	0.000580829	HMGB2/VAV1/TNF/MMP12/OSM/CEBPB/CD47/FCER1G/RIPK2/PTGS2	10
2	GO:0002709	regulation of T cell mediated immunity	7/227	33/7437	4.88081e-05	0.000807836	0.000610595	RSAD2/IL1R1/TNFRSF1B/IL23A/SLAMF1/IL7R/SASH3	7
2	GO:0071347	cellular response to interleukin-1	7/227	33/7437	4.88081e-05	0.000807836	0.000610595	HAS2/CD40/IL1R1/IL1RN/MYD88/CCL22/TANK	7
2	GO:0051251	positive regulation of lymphocyte activation	12/227	101/7437	5.28207e-05	0.000868682	0.000656584	CD274/CD40/NCKAP1L/PELI1/IL2RA/MYD88/IL23A/SLAMF1/RIPK2/CORO1A/IL7R/SASH3	12
2	GO:0002720	positive regulation of cytokine production involved in immune response	6/227	24/7437	6.42178e-05	0.00104943	0.000793203	RSAD2/IL1R1/FCER1G/SLAMF1/DDX21/SASH3	6
2	GO:0010243	response to organonitrogen compound	22/227	289/7437	6.56145e-05	0.00106551	0.000805357	TNFAIP3/TNF/JAK2/TRIB3/PTPN1/SLC39A14/RAB31/PDE4B/PANX1/PID1/PTPN2/ICAM1/PRKCD/MYD88/HSPA5/CEBPB/PDE1B/RAP1B/FCER1G/RIPK2/USF1/AANAT	22
2	GO:0043066	negative regulation of apoptotic process	22/227	291/7437	7.27405e-05	0.00116963	0.000884056	ASNS/BIRC3/HMGB2/TNFAIP3/TNF/PTK2B/SOCS3/PTPN1/SERPINB2/NCKAP1L/ICAM1/PRKCD/HSPA5/HCLS1/HSH2D/CSF2/CEBPB/FCER1G/CORO1A/CDKN2D/PTGS2/IL7R	22
2	GO:0001776	leukocyte homeostasis	7/227	35/7437	7.29322e-05	0.00116963	0.000884056	TCIRG1/TNFAIP3/PDE4B/NCKAP1L/IL2RA/FCER1G/CORO1A	7
2	GO:0002440	production of molecular mediator of immune response	10/227	74/7437	7.45969e-05	0.00118895	0.000898652	RSAD2/CD40/TNF/IL1R1/XRCC4/TNFRSF1B/FCER1G/SLAMF1/DDX21/SASH3	10
2	GO:0030595	leukocyte chemotaxis	11/227	90/7437	8.36488e-05	0.00132504	0.00100152	VAV1/PTK2B/PDE4B/NCKAP1L/RIPOR2/IL23A/CCL22/FCER1G/SLAMF1/CORO1A/RAC2	11
2	GO:1902107	positive regulation of leukocyte differentiation	9/227	61/7437	8.53682e-05	0.00133588	0.00100971	TNF/NCKAP1L/CASP8/LIF/IL23A/HCLS1/RIPK2/IL7R/SASH3	9
2	GO:1903708	positive regulation of hemopoiesis	9/227	61/7437	8.53682e-05	0.00133588	0.00100971	TNF/NCKAP1L/CASP8/LIF/IL23A/HCLS1/RIPK2/IL7R/SASH3	9
2	GO:0001932	regulation of protein phosphorylation	27/227	405/7437	9.66747e-05	0.0015037	0.00113656	LCP2/TNFAIP3/CD40/TNF/FGF23/PTK2B/TRIB3/PTPN1/PTPRC/AREG/FGD2/PID1/PTPN2/PRKCD/INHBA/DUSP5/UBASH3B/LIF/IL23A/PIK3R5/HCLS1/OSM/TRIB1/CSF2/HBEGF/RIPK2/PTGS2	27
2	GO:0002369	T cell cytokine production	5/227	17/7437	0.000116173	0.00177491	0.00134154	RSAD2/IL1R1/TNFRSF1B/SLAMF1/SASH3	5
2	GO:0002724	regulation of T cell cytokine production	5/227	17/7437	0.000116173	0.00177491	0.00134154	RSAD2/IL1R1/TNFRSF1B/SLAMF1/SASH3	5
2	GO:0030225	macrophage differentiation	5/227	17/7437	0.000116173	0.00177491	0.00134154	PTPN2/CASP8/LIF/HCLS1/CSF2	5
2	GO:0002224	toll-like receptor signaling pathway	8/227	50/7437	0.000118149	0.00179447	0.00135633	RSAD2/PIK3AP1/TNFAIP3/CD40/PELI1/MYD88/TNIP1/RIPK2	8
2	GO:0002700	regulation of production of molecular mediator of immune response	9/227	65/7437	0.000141538	0.00213714	0.00161534	RSAD2/CD40/TNF/IL1R1/TNFRSF1B/FCER1G/SLAMF1/DDX21/SASH3	9
2	GO:0000165	MAPK cascade	20/227	264/7437	0.000152167	0.00222321	0.00168039	TNF/FGF23/PTK2B/PTPN1/FGD2/PTPN2/ICAM1/PRKCD/DUSP5/MAPK14/LIF/MYD88/PIK3R5/OSM/TRIB1/TNIP1/RAP1B/CCL22/RIPK2/ATF3	20
2	GO:0002726	positive regulation of T cell cytokine production	4/227	10/7437	0.000153599	0.00222321	0.00168039	RSAD2/IL1R1/SLAMF1/SASH3	4
2	GO:0032753	positive regulation of interleukin-4 production	4/227	10/7437	0.000153599	0.00222321	0.00168039	IL1RAP/CEBPB/FCER1G/SASH3	4
2	GO:0033273	response to vitamin	4/227	10/7437	0.000153599	0.00222321	0.00168039	CYP24A1/SPP1/CYP27B1/CDKN2D	4
2	GO:0043372	positive regulation of CD4-positive, alpha-beta T cell differentiation	4/227	10/7437	0.000153599	0.00222321	0.00168039	NCKAP1L/IL23A/RIPK2/SASH3	4
2	GO:0002711	positive regulation of T cell mediated immunity	5/227	18/7437	0.000156882	0.00222321	0.00168039	RSAD2/IL1R1/IL23A/SLAMF1/SASH3	5
2	GO:0032620	interleukin-17 production	5/227	18/7437	0.000156882	0.00222321	0.00168039	LY9/NCKAP1L/MYD88/IL23A/OSM	5
2	GO:0032660	regulation of interleukin-17 production	5/227	18/7437	0.000156882	0.00222321	0.00168039	LY9/NCKAP1L/MYD88/IL23A/OSM	5
2	GO:0043368	positive T cell selection	5/227	18/7437	0.000156882	0.00222321	0.00168039	LY9/IL6/PTPN2/DOCK2/IL23A	5
2	GO:0032635	interleukin-6 production	8/227	52/7437	0.000157133	0.00222321	0.00168039	TNFAIP3/TNF/NCKAP1L/MYD88/IL1RAP/CEBPB/FCER1G/RIPK2	8
2	GO:0032675	regulation of interleukin-6 production	8/227	52/7437	0.000157133	0.00222321	0.00168039	TNFAIP3/TNF/NCKAP1L/MYD88/IL1RAP/CEBPB/FCER1G/RIPK2	8
2	GO:0043086	negative regulation of catalytic activity	16/227	185/7437	0.000157571	0.00222321	0.00168039	TNFAIP3/TNF/TRIB3/PTPN1/PTPRC/SLC39A14/SERPINB2/NCKAP1L/PICALM/PTPN2/PRKCD/DUSP5/UBASH3B/CYP27B1/CDKN2D/PTGS2	16
2	GO:0050830	defense response to Gram-positive bacterium	6/227	28/7437	0.00016226	0.00227693	0.00172099	HMGB2/TNF/MYD88/RIPK2/CAMP/IL7R	6
2	GO:0007249	I-kappaB kinase/NF-kappaB signaling	11/227	97/7437	0.000165789	0.00230931	0.00174547	TNFAIP3/CD40/TNF/PELI1/CASP8/MYD88/RELB/TNIP1/RIPK2/DDX21/TANK	11
2	GO:0045859	regulation of protein kinase activity	18/227	225/7437	0.000166356	0.00230931	0.00174547	LCP2/TNFAIP3/TNF/PTK2B/TRIB3/PTPN1/PTPRC/AREG/FGD2/PTPN2/PRKCD/DUSP5/UBASH3B/IL23A/PIK3R5/TRIB1/HBEGF/RIPK2	18
2	GO:0071887	leukocyte apoptotic process	7/227	40/7437	0.000177569	0.00245179	0.00185316	CD274/BCL2L11/IL2RA/HCLS1/HSH2D/FCER1G/IL7R	7
2	GO:0002687	positive regulation of leukocyte migration	8/227	53/7437	0.000180273	0.00247587	0.00187136	PTK2B/IL1R1/NCKAP1L/ICAM1/RIPOR2/IL23A/SLAMF1/RAC2	8
2	GO:0070372	regulation of ERK1 and ERK2 cascade	11/227	98/7437	0.000181817	0.00248387	0.0018774	FGF23/PTK2B/PTPN1/PTPN2/ICAM1/LIF/TNIP1/RAP1B/CCL22/RIPK2/ATF3	11
2	GO:0071417	cellular response to organonitrogen compound	16/227	188/7437	0.000189968	0.00258157	0.00195125	TNF/JAK2/TRIB3/PTPN1/SLC39A14/RAB31/PDE4B/PID1/PTPN2/ICAM1/PRKCD/CEBPB/RAP1B/RIPK2/USF1/AANAT	16
2	GO:2000514	regulation of CD4-positive, alpha-beta T cell activation	5/227	19/7437	0.000207655	0.0028058	0.00212074	CD274/NCKAP1L/IL23A/RIPK2/SASH3	5
2	GO:0016064	immunoglobulin mediated immune response	7/227	41/7437	0.000208642	0.0028058	0.00212074	LOC484960/TCIRG1/CD40/TNF/PRKCD/MYD88/FCER1G	7
2	GO:1901653	cellular response to peptide	11/227	100/7437	0.000217844	0.00291436	0.00220279	JAK2/TRIB3/PTPN1/SLC39A14/RAB31/PID1/PTPN2/ICAM1/PRKCD/RIPK2/USF1	11
2	GO:0050866	negative regulation of cell activation	9/227	69/7437	0.000225715	0.00299554	0.00226415	CD274/TNFAIP3/PTPN2/PRKCD/PELI1/UBASH3B/IL2RA/CEBPB/PAG1	9
2	GO:0071396	cellular response to lipid	14/227	153/7437	0.000226445	0.00299554	0.00226415	CD274/HMGB2/TNFAIP3/TNF/PTK2B/PDE4B/PID1/NLRP3/MYD88/SPP1/TRIB1/ABCA1/CYP27B1/RIPK2	14
2	GO:0001934	positive regulation of protein phosphorylation	20/227	272/7437	0.000227392	0.00299554	0.00226415	LCP2/CD40/TNF/FGF23/PTK2B/PTPN1/PTPRC/AREG/FGD2/PRKCD/INHBA/LIF/IL23A/PIK3R5/HCLS1/OSM/CSF2/HBEGF/RIPK2/PTGS2	20
2	GO:0002825	regulation of T-helper 1 type immune response	4/227	11/7437	0.000235608	0.00301159	0.00227628	IL1R1/IL23A/SLAMF1/RIPK2	4
2	GO:0006775	fat-soluble vitamin metabolic process	4/227	11/7437	0.000235608	0.00301159	0.00227628	TNF/FGF23/CYP24A1/CYP27B1	4
2	GO:0032633	interleukin-4 production	4/227	11/7437	0.000235608	0.00301159	0.00227628	IL1RAP/CEBPB/FCER1G/SASH3	4
2	GO:0032673	regulation of interleukin-4 production	4/227	11/7437	0.000235608	0.00301159	0.00227628	IL1RAP/CEBPB/FCER1G/SASH3	4
2	GO:0032740	positive regulation of interleukin-17 production	4/227	11/7437	0.000235608	0.00301159	0.00227628	LY9/MYD88/IL23A/OSM	4
2	GO:2000516	positive regulation of CD4-positive, alpha-beta T cell activation	4/227	11/7437	0.000235608	0.00301159	0.00227628	NCKAP1L/IL23A/RIPK2/SASH3	4
2	GO:0050764	regulation of phagocytosis	6/227	30/7437	0.000242995	0.00308776	0.00233385	TNF/IL2RG/NCKAP1L/DOCK2/CD47/FCER1G	6
2	GO:0019724	B cell mediated immunity	7/227	42/7437	0.000243959	0.00308776	0.00233385	LOC484960/TCIRG1/CD40/TNF/PRKCD/MYD88/FCER1G	7
2	GO:0071495	cellular response to endogenous stimulus	27/227	429/7437	0.000250671	0.00315723	0.00238636	HAS2/TNF/FGF23/SULF1/UGCG/JAK2/TRIB3/PTPN1/SLC39A14/RAB31/PDE4B/PID1/HIVEP1/PTPN2/ICAM1/PRKCD/EBI3/MTMR4/HSPA5/CEBPB/RAP1B/RIPK2/CORO1A/USF1/IQGAP1/SULF2/AANAT	27
2	GO:0042113	B cell activation	10/227	86/7437	0.000267037	0.00331503	0.00250563	TCIRG1/TNFAIP3/CD40/PTK2B/NCKAP1L/PTPN2/PRKCD/PELI1/IL7R/SASH3	10
2	GO:0043122	regulation of I-kappaB kinase/NF-kappaB signaling	10/227	86/7437	0.000267037	0.00331503	0.00250563	TNFAIP3/CD40/TNF/PELI1/CASP8/MYD88/TNIP1/RIPK2/DDX21/TANK	10
2	GO:0002262	myeloid cell homeostasis	8/227	56/7437	0.000267051	0.00331503	0.00250563	HMGB2/JAK2/PDE4B/NCKAP1L/PTPN2/INHBA/HCLS1/FCER1G	8
2	GO:0032731	positive regulation of interleukin-1 beta production	5/227	20/7437	0.000270043	0.00332025	0.00250958	TNF/PANX1/NLRP3/CASP8/RIPK2	5
2	GO:0045123	cellular extravasation	5/227	20/7437	0.000270043	0.00332025	0.00250958	TNF/IL1R1/ICAM1/RIPOR2/ITGAL	5
2	GO:0070371	ERK1 and ERK2 cascade	11/227	103/7437	0.000283119	0.00346452	0.00261862	FGF23/PTK2B/PTPN1/PTPN2/ICAM1/LIF/TNIP1/RAP1B/CCL22/RIPK2/ATF3	11
2	GO:0002526	acute inflammatory response	6/227	31/7437	0.000293719	0.00352824	0.00266678	TNF/IL6/NLRP3/IL1A/FCER1G/PTGS2	6
2	GO:0032611	interleukin-1 beta production	6/227	31/7437	0.000293719	0.00352824	0.00266678	TNFAIP3/TNF/PANX1/NLRP3/CASP8/RIPK2	6
2	GO:0032651	regulation of interleukin-1 beta production	6/227	31/7437	0.000293719	0.00352824	0.00266678	TNFAIP3/TNF/PANX1/NLRP3/CASP8/RIPK2	6
2	GO:0007162	negative regulation of cell adhesion	10/227	87/7437	0.000293792	0.00352824	0.00266678	CD274/MMP12/PTPN2/PRKCD/PELI1/UBASH3B/IL2RA/RIPOR2/CEBPB/PAG1	10
2	GO:1901652	response to peptide	12/227	121/7437	0.000302879	0.00362053	0.00273654	TNFAIP3/JAK2/TRIB3/PTPN1/SLC39A14/RAB31/PID1/PTPN2/ICAM1/PRKCD/RIPK2/USF1	12
2	GO:0002673	regulation of acute inflammatory response	4/227	12/7437	0.000344985	0.00403884	0.00305272	TNF/NLRP3/FCER1G/PTGS2	4
2	GO:0046006	regulation of activated T cell proliferation	4/227	12/7437	0.000344985	0.00403884	0.00305272	CD274/IL2RA/IL23A/SLAMF1	4
2	GO:0006801	superoxide metabolic process	5/227	21/7437	0.000345694	0.00403884	0.00305272	CYB5R4/PRKCD/GCH1/NCF2/ITGAM	5
2	GO:0031663	lipopolysaccharide-mediated signaling pathway	5/227	21/7437	0.000345694	0.00403884	0.00305272	TNFAIP3/TNF/MYD88/TRIB1/RIPK2	5
2	GO:0051353	positive regulation of oxidoreductase activity	5/227	21/7437	0.000345694	0.00403884	0.00305272	TNF/FGF23/PTK2B/GCH1/CYP27B1	5
2	GO:0071356	cellular response to tumor necrosis factor	9/227	73/7437	0.000347849	0.00404571	0.00305791	HAS2/CD40/TNF/PTK2B/JAK2/PID1/PTPN2/CCL22/TANK	9
2	GO:0043408	regulation of MAPK cascade	18/227	240/7437	0.000369828	0.00428204	0.00323654	TNF/FGF23/PTK2B/PTPN1/FGD2/PTPN2/ICAM1/PRKCD/DUSP5/LIF/MYD88/PIK3R5/OSM/TNIP1/RAP1B/CCL22/RIPK2/ATF3	18
2	GO:2001233	regulation of apoptotic signaling pathway	13/227	142/7437	0.000376984	0.00434542	0.00328444	HMGB2/TNFAIP3/TNF/TNFRSF12A/PTPN1/PTPN2/ICAM1/PRKCD/INHBA/CSF2/CDKN2D/PTGS2/ATF3	13
2	GO:0002702	positive regulation of production of molecular mediator of immune response	7/227	45/7437	0.000379656	0.00435676	0.00329301	RSAD2/CD40/IL1R1/FCER1G/SLAMF1/DDX21/SASH3	7
2	GO:0042327	positive regulation of phosphorylation	21/227	306/7437	0.000406659	0.00464599	0.00351163	LCP2/CD40/TNF/FGF23/PTK2B/PTPN1/PTPRC/AREG/FGD2/PRKCD/INHBA/MAPK14/LIF/IL23A/PIK3R5/HCLS1/OSM/CSF2/HBEGF/RIPK2/PTGS2	21
2	GO:0008625	extrinsic apoptotic signaling pathway via death domain receptors	6/227	33/7437	0.000419855	0.00475467	0.00359377	HMGB2/TNFAIP3/TNF/ICAM1/CASP8/ATF3	6
2	GO:0050729	positive regulation of inflammatory response	6/227	33/7437	0.000419855	0.00475467	0.00359377	TNF/OSM/CEBPB/CD47/FCER1G/PTGS2	6
2	GO:0042325	regulation of phosphorylation	28/227	467/7437	0.000425002	0.00479185	0.00362187	LCP2/TNFAIP3/CD40/TNF/FGF23/PTK2B/TRIB3/PTPN1/PTPRC/AREG/FGD2/PID1/PTPN2/PRKCD/INHBA/DUSP5/MAPK14/UBASH3B/LIF/IL23A/PIK3R5/HCLS1/OSM/TRIB1/CSF2/HBEGF/RIPK2/PTGS2	28
2	GO:0050870	positive regulation of T cell activation	9/227	75/7437	0.000426849	0.00479185	0.00362187	CD274/NCKAP1L/IL2RA/IL23A/SLAMF1/RIPK2/CORO1A/IL7R/SASH3	9
2	GO:0002683	negative regulation of immune system process	13/227	144/7437	0.000431933	0.00482793	0.00364914	CD274/TNFAIP3/TNF/MMP12/PTPN2/PELI1/UBASH3B/IL2RA/CEBPB/FCER1G/SLAMF1/PAG1/IL7R	13
2	GO:0002260	lymphocyte homeostasis	5/227	22/7437	0.000436348	0.00483541	0.0036548	TCIRG1/TNFAIP3/NCKAP1L/IL2RA/CORO1A	5
2	GO:0032732	positive regulation of interleukin-1 production	5/227	22/7437	0.000436348	0.00483541	0.0036548	TNF/PANX1/NLRP3/CASP8/RIPK2	5
2	GO:0043085	positive regulation of catalytic activity	24/227	376/7437	0.000458595	0.00506022	0.00382472	LCP2/HMGB2/VAV1/TNF/FGF23/PTK2B/TRIB3/PTPN1/PCNA/AREG/FGD2/PSME2/PICALM/PRKCD/NLRP3/CASP8/GCH1/XRCC4/IL23A/PIK3R5/HBEGF/CCL22/CYP27B1/RIPK2	24
2	GO:0006935	chemotaxis	17/227	224/7437	0.000469568	0.0051265	0.00387481	HMGB2/VAV1/PTK2B/PTAFR/PDE4B/NCKAP1L/PTPN2/DOCK2/PRKCD/RIPOR2/IL23A/CCL22/FCER1G/CCRL2/SLAMF1/CORO1A/RAC2	17
2	GO:0042330	taxis	17/227	224/7437	0.000469568	0.0051265	0.00387481	HMGB2/VAV1/PTK2B/PTAFR/PDE4B/NCKAP1L/PTPN2/DOCK2/PRKCD/RIPOR2/IL23A/CCL22/FCER1G/CCRL2/SLAMF1/CORO1A/RAC2	17
2	GO:0022408	negative regulation of cell-cell adhesion	8/227	61/7437	0.000485638	0.0051265	0.00387481	CD274/PTPN2/PRKCD/PELI1/UBASH3B/IL2RA/CEBPB/PAG1	8
2	GO:1903322	positive regulation of protein modification by small protein conjugation or removal	8/227	61/7437	0.000485638	0.0051265	0.00387481	BIRC3/TRIB3/PELI1/HSPA5/TNIP1/RIPK2/GNL3/TANK	8
2	GO:0001893	maternal placenta development	4/227	13/7437	0.000486442	0.0051265	0.00387481	PRDM1/LIF/CYP27B1/PTGS2	4
2	GO:0042119	neutrophil activation	4/227	13/7437	0.000486442	0.0051265	0.00387481	PRKCD/MYD88/ITGAM/FCER1G	4
2	GO:0043029	T cell homeostasis	4/227	13/7437	0.000486442	0.0051265	0.00387481	TCIRG1/NCKAP1L/IL2RA/CORO1A	4
2	GO:0046633	alpha-beta T cell proliferation	4/227	13/7437	0.000486442	0.0051265	0.00387481	CD274/DOCK2/IL23A/RIPK2	4
2	GO:0050798	activated T cell proliferation	4/227	13/7437	0.000486442	0.0051265	0.00387481	CD274/IL2RA/IL23A/SLAMF1	4
2	GO:0070266	necroptotic process	4/227	13/7437	0.000486442	0.0051265	0.00387481	BIRC3/TNF/PELI1/CASP8	4
2	GO:0090023	positive regulation of neutrophil chemotaxis	4/227	13/7437	0.000486442	0.0051265	0.00387481	NCKAP1L/RIPOR2/IL23A/RAC2	4
2	GO:0030316	osteoclast differentiation	6/227	34/7437	0.000496991	0.00518682	0.00392041	TCIRG1/TNF/UBASH3B/IL23A/CEBPB/FCER1G	6
2	GO:1904892	regulation of receptor signaling pathway via STAT	6/227	34/7437	0.000496991	0.00518682	0.00392041	PTK2B/IL6/PTPN2/LIF/IL23A/IL7R	6
2	GO:0010562	positive regulation of phosphorus metabolic process	22/227	333/7437	0.000500201	0.00518682	0.00392041	LCP2/CD40/TNF/FGF23/PTK2B/PTPN1/PTPRC/AREG/FGD2/PID1/PRKCD/INHBA/MAPK14/LIF/IL23A/PIK3R5/HCLS1/OSM/CSF2/HBEGF/RIPK2/PTGS2	22
2	GO:0045937	positive regulation of phosphate metabolic process	22/227	333/7437	0.000500201	0.00518682	0.00392041	LCP2/CD40/TNF/FGF23/PTK2B/PTPN1/PTPRC/AREG/FGD2/PID1/PRKCD/INHBA/MAPK14/LIF/IL23A/PIK3R5/HCLS1/OSM/CSF2/HBEGF/RIPK2/PTGS2	22
2	GO:0002685	regulation of leukocyte migration	9/227	77/7437	0.000520061	0.00537119	0.00405976	PTK2B/IL1R1/NCKAP1L/ICAM1/RIPOR2/MYD88/IL23A/SLAMF1/RAC2	9
2	GO:0070373	negative regulation of ERK1 and ERK2 cascade	5/227	23/7437	0.00054383	0.0055721	0.00421162	PTPN1/PTPN2/LIF/TNIP1/ATF3	5
2	GO:0071622	regulation of granulocyte chemotaxis	5/227	23/7437	0.00054383	0.0055721	0.00421162	NCKAP1L/RIPOR2/IL23A/SLAMF1/RAC2	5
2	GO:0097190	apoptotic signaling pathway	17/227	227/7437	0.000547315	0.00558565	0.00422185	HMGB2/TNFAIP3/TNF/TNFRSF12A/PTPN1/PTPN2/ICAM1/PRKCD/INHBA/ERO1A/CASP8/TNFRSF1B/CSF2/CEBPB/CDKN2D/PTGS2/ATF3	17
2	GO:0097191	extrinsic apoptotic signaling pathway	10/227	94/7437	0.000551157	0.0056027	0.00423475	HMGB2/TNFAIP3/TNF/TNFRSF12A/ICAM1/INHBA/CASP8/TNFRSF1B/CSF2/ATF3	10
2	GO:0032612	interleukin-1 production	6/227	35/7437	0.000584728	0.00585181	0.00442303	TNFAIP3/TNF/PANX1/NLRP3/CASP8/RIPK2	6
2	GO:0032652	regulation of interleukin-1 production	6/227	35/7437	0.000584728	0.00585181	0.00442303	TNFAIP3/TNF/PANX1/NLRP3/CASP8/RIPK2	6
2	GO:0042100	B cell proliferation	6/227	35/7437	0.000584728	0.00585181	0.00442303	CD40/NCKAP1L/PRKCD/PELI1/IL7R/SASH3	6
2	GO:0046634	regulation of alpha-beta T cell activation	6/227	35/7437	0.000584728	0.00585181	0.00442303	CD274/PRDM1/NCKAP1L/IL23A/RIPK2/SASH3	6
2	GO:0072593	reactive oxygen species metabolic process	9/227	79/7437	0.000629362	0.00627418	0.00474227	CYB5R4/VAV1/TNF/PTK2B/PID1/PRKCD/GCH1/NCF2/ITGAM	9
2	GO:1902532	negative regulation of intracellular signal transduction	15/227	189/7437	0.000635262	0.00630864	0.00476832	TNFAIP3/PTPN1/PTPN2/PRKCD/RASA3/NLRP3/DUSP5/CASP8/RIPOR2/LIF/TNIP1/CDKN2D/PTGS2/ATF3/TANK	15
2	GO:0006953	acute-phase response	4/227	14/7437	0.000664811	0.0065257	0.00493239	TNF/IL6/IL1A/PTGS2	4
2	GO:0060135	maternal process involved in female pregnancy	4/227	14/7437	0.000664811	0.0065257	0.00493239	PRDM1/LIF/CYP27B1/PTGS2	4
2	GO:0090382	phagosome maturation	4/227	14/7437	0.000664811	0.0065257	0.00493239	TCIRG1/RAB31/RAB20/CORO1A	4
2	GO:0002763	positive regulation of myeloid leukocyte differentiation	5/227	24/7437	0.000670044	0.0065257	0.00493239	TNF/CASP8/LIF/IL23A/HCLS1	5
2	GO:0045058	T cell selection	5/227	24/7437	0.000670044	0.0065257	0.00493239	LY9/IL6/PTPN2/DOCK2/IL23A	5
2	GO:0006469	negative regulation of protein kinase activity	8/227	64/7437	0.000674811	0.0065257	0.00493239	TNFAIP3/TRIB3/PTPN1/PTPRC/PTPN2/PRKCD/DUSP5/UBASH3B	8
2	GO:2001236	regulation of extrinsic apoptotic signaling pathway	8/227	64/7437	0.000674811	0.0065257	0.00493239	HMGB2/TNFAIP3/TNF/TNFRSF12A/ICAM1/INHBA/CSF2/ATF3	8
2	GO:0033138	positive regulation of peptidyl-serine phosphorylation	6/227	36/7437	0.000684031	0.00659017	0.00498112	TNF/LIF/HCLS1/OSM/RIPK2/PTGS2	6
2	GO:0044092	negative regulation of molecular function	20/227	298/7437	0.000741881	0.00712095	0.0053823	TNFAIP3/TNF/TRIB3/PTPN1/PTPRC/SLC39A14/SERPINB2/NCKAP1L/PICALM/PTPN2/PRKCD/PELI1/NLRP3/DUSP5/UBASH3B/RIPOR2/TRIB1/CYP27B1/CDKN2D/PTGS2	20
2	GO:0002764	immune response-regulating signaling pathway	9/227	81/7437	0.000756777	0.00721032	0.00544985	LCP2/CD40/PTPRC/LOC611538/PDE4B/NCKAP1L/PTPN2/FCER1G/RIPK2	9
2	GO:0002768	immune response-regulating cell surface receptor signaling pathway	9/227	81/7437	0.000756777	0.00721032	0.00544985	LCP2/CD40/PTPRC/LOC611538/PDE4B/NCKAP1L/PTPN2/FCER1G/RIPK2	9
2	GO:1902533	positive regulation of intracellular signal transduction	21/227	322/7437	0.000795173	0.0075483	0.0057053	DDX60/PIK3AP1/CD40/TNF/FGF23/PTK2B/PTPN1/FGD2/PTPN2/ICAM1/PELI1/CASP8/LIF/MYD88/PIK3R5/HCLS1/OSM/RAP1B/CCL22/RIPK2/DDX21	21
2	GO:1901699	cellular response to nitrogen compound	16/227	214/7437	0.000809657	0.00764277	0.00577671	TNF/JAK2/TRIB3/PTPN1/SLC39A14/RAB31/PDE4B/PID1/PTPN2/ICAM1/PRKCD/CEBPB/RAP1B/RIPK2/USF1/AANAT	16
2	GO:0002444	myeloid leukocyte mediated immunity	5/227	25/7437	0.000816965	0.00764277	0.00577671	MYD88/ITGAM/FCER1G/DDX21/RAC2	5
2	GO:0042093	T-helper cell differentiation	5/227	25/7437	0.000816965	0.00764277	0.00577671	LY9/IL6/IL23A/RELB/RIPK2	5
2	GO:0046637	regulation of alpha-beta T cell differentiation	5/227	25/7437	0.000816965	0.00764277	0.00577671	PRDM1/NCKAP1L/IL23A/RIPK2/SASH3	5
2	GO:0002831	regulation of response to biotic stimulus	10/227	99/7437	0.0008316	0.00775159	0.00585896	DDX60/CD274/HMGB2/TNFAIP3/VAV1/MMP12/PTPN2/IL23A/TRIB1/RIPK2	10
2	GO:0030890	positive regulation of B cell proliferation	4/227	15/7437	0.000885006	0.00816102	0.00616843	CD40/NCKAP1L/PELI1/SASH3	4
2	GO:0071624	positive regulation of granulocyte chemotaxis	4/227	15/7437	0.000885006	0.00816102	0.00616843	NCKAP1L/RIPOR2/IL23A/RAC2	4
2	GO:2000351	regulation of endothelial cell apoptotic process	4/227	15/7437	0.000885006	0.00816102	0.00616843	TNFAIP3/CD40/TNF/ICAM1	4
2	GO:0045597	positive regulation of cell differentiation	18/227	260/7437	0.000955402	0.00877882	0.00663538	HMGB2/TNF/TNFRSF12A/NCKAP1L/INHBA/CASP8/MAPK14/LIF/TNFRSF1B/IL23A/HCLS1/CSF2/CEBPB/CYP27B1/RIPK2/PTGS2/IL7R/SASH3	18
2	GO:0045862	positive regulation of proteolysis	11/227	119/7437	0.000975987	0.00893616	0.00675431	TNF/PTK2B/PSME2/PICALM/NLRP3/CASP8/TNFRSF1B/TRIB1/TNIP1/RIPK2/TANK	11
2	GO:0002294	CD4-positive, alpha-beta T cell differentiation involved in immune response	5/227	26/7437	0.000986632	0.00900171	0.00680385	LY9/IL6/IL23A/RELB/RIPK2	5
2	GO:0032940	secretion by cell	18/227	262/7437	0.00104365	0.00948835	0.00717168	RSAD2/RHBDF2/TCIRG1/TNF/RAB31/IL6/INHBA/STX11/LIF/ITGAM/OSM/SPP1/RAB1A/ABCA1/RAP1B/FCER1G/CORO1A/RAC2	18
2	GO:0071375	cellular response to peptide hormone stimulus	9/227	85/7437	0.00107481	0.00973741	0.00735993	JAK2/TRIB3/PTPN1/SLC39A14/RAB31/PID1/PTPN2/PRKCD/USF1	9
2	GO:0006470	protein dephosphorylation	8/227	69/7437	0.00111862	0.0100637	0.00760652	TNF/PTPN1/PTPRC/NCKAP1L/PRKCD/DUSP5/UBASH3B/PTPN9	8
2	GO:0033673	negative regulation of kinase activity	8/227	69/7437	0.00111862	0.0100637	0.00760652	TNFAIP3/TRIB3/PTPN1/PTPRC/PTPN2/PRKCD/DUSP5/UBASH3B	8
2	GO:0043549	regulation of kinase activity	18/227	264/7437	0.00113877	0.0101864	0.00769925	LCP2/TNFAIP3/TNF/PTK2B/TRIB3/PTPN1/PTPRC/AREG/FGD2/PTPN2/PRKCD/DUSP5/UBASH3B/IL23A/PIK3R5/TRIB1/HBEGF/RIPK2	18
2	GO:0036230	granulocyte activation	4/227	16/7437	0.00115198	0.0101864	0.00769925	PRKCD/MYD88/ITGAM/FCER1G	4
2	GO:0046638	positive regulation of alpha-beta T cell differentiation	4/227	16/7437	0.00115198	0.0101864	0.00769925	NCKAP1L/IL23A/RIPK2/SASH3	4
2	GO:0072577	endothelial cell apoptotic process	4/227	16/7437	0.00115198	0.0101864	0.00769925	TNFAIP3/CD40/TNF/ICAM1	4
2	GO:0090022	regulation of neutrophil chemotaxis	4/227	16/7437	0.00115198	0.0101864	0.00769925	NCKAP1L/RIPOR2/IL23A/RAC2	4
2	GO:0031334	positive regulation of protein-containing complex assembly	9/227	86/7437	0.00116923	0.0102684	0.00776125	TNF/PTK2B/WAS/NCKAP1L/GMFG/CSF2/ABCA1/RAP1B/CORO1A	9
2	GO:0071706	tumor necrosis factor superfamily cytokine production	7/227	54/7437	0.00117403	0.0102684	0.00776125	CD274/TNFAIP3/MYD88/IL23A/FCER1G/RIPK2/SASH3	7
2	GO:1903555	regulation of tumor necrosis factor superfamily cytokine production	7/227	54/7437	0.00117403	0.0102684	0.00776125	CD274/TNFAIP3/MYD88/IL23A/FCER1G/RIPK2/SASH3	7
2	GO:0002287	alpha-beta T cell activation involved in immune response	5/227	27/7437	0.00118114	0.0102684	0.00776125	LY9/IL6/IL23A/RELB/RIPK2	5
2	GO:0002293	alpha-beta T cell differentiation involved in immune response	5/227	27/7437	0.00118114	0.0102684	0.00776125	LY9/IL6/IL23A/RELB/RIPK2	5
2	GO:0051250	negative regulation of lymphocyte activation	7/227	55/7437	0.00131097	0.0113588	0.00858546	CD274/TNFAIP3/PTPN2/PELI1/IL2RA/CEBPB/PAG1	7
2	GO:0002690	positive regulation of leukocyte chemotaxis	6/227	41/7437	0.00139056	0.0119681	0.00904595	PTK2B/NCKAP1L/RIPOR2/IL23A/SLAMF1/RAC2	6
2	GO:0030218	erythrocyte differentiation	6/227	41/7437	0.00139056	0.0119681	0.00904595	HMGB2/JAK2/NCKAP1L/PTPN2/INHBA/HCLS1	6
2	GO:0032733	positive regulation of interleukin-10 production	4/227	17/7437	0.00147069	0.0125739	0.00950387	CD274/IL23A/FCER1G/SASH3	4
2	GO:0043370	regulation of CD4-positive, alpha-beta T cell differentiation	4/227	17/7437	0.00147069	0.0125739	0.00950387	NCKAP1L/IL23A/RIPK2/SASH3	4
2	GO:0032869	cellular response to insulin stimulus	8/227	72/7437	0.00148065	0.0126173	0.00953664	TRIB3/PTPN1/SLC39A14/RAB31/PID1/PTPN2/PRKCD/USF1	8
2	GO:0007229	integrin-mediated signaling pathway	6/227	42/7437	0.00158166	0.0134337	0.0101537	VAV1/PTK2B/ITGB2/ITGAM/ITGAL/FCER1G	6
2	GO:0009615	response to virus	10/227	109/7437	0.00174566	0.014778	0.0111698	RSAD2/OAS3/DDX60/ISG20/CD40/TNF/MMP12/MYD88/IL23A/DDX21	10
2	GO:0034101	erythrocyte homeostasis	6/227	43/7437	0.0017921	0.0150723	0.0113923	HMGB2/JAK2/NCKAP1L/PTPN2/INHBA/HCLS1	6
2	GO:0050868	negative regulation of T cell activation	6/227	43/7437	0.0017921	0.0150723	0.0113923	CD274/PTPN2/PELI1/IL2RA/CEBPB/PAG1	6
2	GO:0002886	regulation of myeloid leukocyte mediated immunity	4/227	18/7437	0.00184606	0.0154257	0.0116594	ITGAM/FCER1G/DDX21/RAC2	4
2	GO:0097300	programmed necrotic cell death	4/227	18/7437	0.00184606	0.0154257	0.0116594	BIRC3/TNF/PELI1/CASP8	4
2	GO:1903530	regulation of secretion by cell	13/227	169/7437	0.00192353	0.0160211	0.0121094	RSAD2/RHBDF2/TCIRG1/TNF/IL6/INHBA/LIF/ITGAM/OSM/SPP1/RAP1B/FCER1G/RAC2	13
2	GO:0070227	lymphocyte apoptotic process	5/227	30/7437	0.00193537	0.0160679	0.0121448	CD274/BCL2L11/IL2RA/HSH2D/IL7R	5
2	GO:0043409	negative regulation of MAPK cascade	7/227	59/7437	0.00198801	0.0164521	0.0124351	PTPN1/PTPN2/PRKCD/DUSP5/LIF/TNIP1/ATF3	7
2	GO:0022612	gland morphogenesis	6/227	44/7437	0.00202311	0.0166359	0.0125741	TNFAIP3/TNF/SULF1/IL6/CEBPB/SULF2	6
2	GO:1903038	negative regulation of leukocyte cell-cell adhesion	6/227	44/7437	0.00202311	0.0166359	0.0125741	CD274/PTPN2/PELI1/IL2RA/CEBPB/PAG1	6
2	GO:0060627	regulation of vesicle-mediated transport	13/227	171/7437	0.00213636	0.0175114	0.0132358	TNF/PTPN1/IL2RG/NCKAP1L/PICALM/DOCK2/ITGAM/CD47/RAP1B/FCER1G/SLAMF1/CORO1A/RAC2	13
2	GO:0045580	regulation of T cell differentiation	7/227	60/7437	0.00219337	0.0179218	0.013546	PRDM1/NCKAP1L/PTPN2/IL23A/RIPK2/IL7R/SASH3	7
2	GO:0140352	export from cell	18/227	280/7437	0.00220241	0.0179389	0.0135589	RSAD2/RHBDF2/TCIRG1/TNF/RAB31/IL6/INHBA/STX11/LIF/ITGAM/OSM/SPP1/RAB1A/ABCA1/RAP1B/FCER1G/CORO1A/RAC2	18
2	GO:0001909	leukocyte mediated cytotoxicity	5/227	31/7437	0.00225107	0.0181633	0.0137286	VAV1/MYD88/IL23A/CORO1A/IL7R	5
2	GO:0002275	myeloid cell activation involved in immune response	5/227	31/7437	0.00225107	0.0181633	0.0137286	DOCK2/MYD88/ITGAM/FCER1G/RAC2	5
2	GO:0032760	positive regulation of tumor necrosis factor production	5/227	31/7437	0.00225107	0.0181633	0.0137286	MYD88/IL23A/FCER1G/RIPK2/SASH3	5
2	GO:0032102	negative regulation of response to external stimulus	11/227	132/7437	0.00226596	0.0181933	0.0137512	AOAH/TNFAIP3/TNF/MMP12/PTPN2/PRKCD/NLRP3/UBASH3B/IL2RA/TNFRSF1B/TRIB1	11
2	GO:0001906	cell killing	6/227	45/7437	0.00227595	0.0181933	0.0137512	VAV1/MYD88/IL23A/CORO1A/CAMP/IL7R	6
2	GO:0006911	phagocytosis, engulfment	4/227	19/7437	0.00228297	0.0181933	0.0137512	NCKAP1L/ABCA1/FCER1G/RAC2	4
2	GO:2000107	negative regulation of leukocyte apoptotic process	4/227	19/7437	0.00228297	0.0181933	0.0137512	HCLS1/HSH2D/FCER1G/IL7R	4
2	GO:0023061	signal release	12/227	152/7437	0.00229327	0.0182192	0.0137708	TCIRG1/TNF/IL6/INHBA/STX11/LIF/OSM/SPP1/RAB1A/ABCA1/RAP1B/FCER1G	12
2	GO:0051338	regulation of transferase activity	19/227	304/7437	0.00230411	0.0182491	0.0137934	LCP2/TNFAIP3/TNF/PTK2B/TRIB3/PTPN1/PTPRC/PCNA/AREG/FGD2/PTPN2/PRKCD/DUSP5/UBASH3B/IL23A/PIK3R5/TRIB1/HBEGF/RIPK2	19
2	GO:0044283	small molecule biosynthetic process	16/227	237/7437	0.00235588	0.0186021	0.0140602	ASNS/ALDH1A3/TNF/PTK2B/TRIB3/PTAFR/SLC39A14/PDE4B/PTPN2/UPB1/GCH1/BCAT1/CYP27B1/PTGS2/NME1/ATF3	16
2	GO:0002695	negative regulation of leukocyte activation	7/227	61/7437	0.00241475	0.0190088	0.0143676	CD274/TNFAIP3/PTPN2/PELI1/IL2RA/CEBPB/PAG1	7
2	GO:0044403	biological process involved in symbiotic interaction	11/227	134/7437	0.00255172	0.0200165	0.0151292	RSAD2/ISG20/TNF/ICAM1/MYD88/CHD1/TNIP1/RAB1A/SLAMF1/CAMP/USF1	11
2	GO:0010817	regulation of hormone levels	12/227	154/7437	0.00255826	0.0200165	0.0151292	ALDH1A3/TCIRG1/TNF/SLC39A14/IL6/INHBA/LIF/OSM/SPP1/RAB1A/CYP27B1/AANAT	12
2	GO:0045582	positive regulation of T cell differentiation	5/227	32/7437	0.00260268	0.0202413	0.0152992	NCKAP1L/IL23A/RIPK2/IL7R/SASH3	5
2	GO:1903557	positive regulation of tumor necrosis factor superfamily cytokine production	5/227	32/7437	0.00260268	0.0202413	0.0152992	MYD88/IL23A/FCER1G/RIPK2/SASH3	5
2	GO:0051348	negative regulation of transferase activity	8/227	79/7437	0.00268929	0.0208088	0.0157281	TNFAIP3/TRIB3/PTPN1/PTPRC/PTPN2/PRKCD/DUSP5/UBASH3B	8
2	GO:0010563	negative regulation of phosphorus metabolic process	12/227	155/7437	0.00269983	0.0208088	0.0157281	TNFAIP3/TNF/TRIB3/PTPN1/PTPRC/NCKAP1L/PID1/PTPN2/PRKCD/DUSP5/UBASH3B/IQGAP1	12
2	GO:0045936	negative regulation of phosphate metabolic process	12/227	155/7437	0.00269983	0.0208088	0.0157281	TNFAIP3/TNF/TRIB3/PTPN1/PTPRC/NCKAP1L/PID1/PTPN2/PRKCD/DUSP5/UBASH3B/IQGAP1	12
2	GO:0002437	inflammatory response to antigenic stimulus	4/227	20/7437	0.00278621	0.0209737	0.0158528	HMGB2/TNF/IL1RN/FCER1G	4
2	GO:0042130	negative regulation of T cell proliferation	4/227	20/7437	0.00278621	0.0209737	0.0158528	CD274/PELI1/IL2RA/CEBPB	4
2	GO:0043124	negative regulation of I-kappaB kinase/NF-kappaB signaling	4/227	20/7437	0.00278621	0.0209737	0.0158528	TNFAIP3/CASP8/TNIP1/TANK	4
2	GO:0043299	leukocyte degranulation	4/227	20/7437	0.00278621	0.0209737	0.0158528	ITGAM/FCER1G/CORO1A/RAC2	4
2	GO:0070265	necrotic cell death	4/227	20/7437	0.00278621	0.0209737	0.0158528	BIRC3/TNF/PELI1/CASP8	4
2	GO:0099024	plasma membrane invagination	4/227	20/7437	0.00278621	0.0209737	0.0158528	NCKAP1L/ABCA1/FCER1G/RAC2	4
2	GO:1902041	regulation of extrinsic apoptotic signaling pathway via death domain receptors	4/227	20/7437	0.00278621	0.0209737	0.0158528	HMGB2/TNFAIP3/ICAM1/ATF3	4
2	GO:1904894	positive regulation of receptor signaling pathway via STAT	4/227	20/7437	0.00278621	0.0209737	0.0158528	PTK2B/IL6/IL23A/IL7R	4
2	GO:0002507	tolerance induction	3/227	10/7437	0.00287273	0.0211322	0.0159726	CD274/TNFAIP3/IL2RA	3
2	GO:0002691	regulation of cellular extravasation	3/227	10/7437	0.00287273	0.0211322	0.0159726	IL1R1/ICAM1/RIPOR2	3
2	GO:0014015	positive regulation of gliogenesis	3/227	10/7437	0.00287273	0.0211322	0.0159726	TNF/LIF/TNFRSF1B	3
2	GO:0031649	heat generation	3/227	10/7437	0.00287273	0.0211322	0.0159726	TNF/IL1A/PTGS2	3
2	GO:0032069	regulation of nuclease activity	3/227	10/7437	0.00287273	0.0211322	0.0159726	HMGB2/PCNA/PRKCD	3
2	GO:0046640	regulation of alpha-beta T cell proliferation	3/227	10/7437	0.00287273	0.0211322	0.0159726	CD274/IL23A/RIPK2	3
2	GO:0070498	interleukin-1-mediated signaling pathway	3/227	10/7437	0.00287273	0.0211322	0.0159726	IL1R1/IL1RN/MYD88	3
2	GO:0070670	response to interleukin-4	3/227	10/7437	0.00287273	0.0211322	0.0159726	PTPN2/HSPA5/CORO1A	3
2	GO:0043123	positive regulation of I-kappaB kinase/NF-kappaB signaling	7/227	63/7437	0.0029088	0.021315	0.0161107	CD40/TNF/PELI1/CASP8/MYD88/RIPK2/DDX21	7
2	GO:0009725	response to hormone	15/227	220/7437	0.00291409	0.021315	0.0161107	HMGB2/TNF/UGCG/JAK2/TRIB3/PTPN1/SLC39A14/RAB31/PID1/PTPN2/PRKCD/EBI3/HCLS1/CYP27B1/USF1	15
2	GO:0030968	endoplasmic reticulum unfolded protein response	5/227	33/7437	0.00299247	0.0217038	0.0164046	PTPN1/PTPN2/ERO1A/HSPA5/ATF3	5
2	GO:0051341	regulation of oxidoreductase activity	5/227	33/7437	0.00299247	0.0217038	0.0164046	TNF/FGF23/PTK2B/GCH1/CYP27B1	5
2	GO:2000106	regulation of leukocyte apoptotic process	5/227	33/7437	0.00299247	0.0217038	0.0164046	CD274/HCLS1/HSH2D/FCER1G/IL7R	5
2	GO:0043410	positive regulation of MAPK cascade	13/227	178/7437	0.00303967	0.0219844	0.0166167	TNF/FGF23/PTK2B/PTPN1/FGD2/ICAM1/LIF/MYD88/PIK3R5/OSM/RAP1B/CCL22/RIPK2	13
2	GO:0002253	activation of immune response	9/227	99/7437	0.00312709	0.0224906	0.0169993	LCP2/LOC484960/PTPRC/PDE4B/NCKAP1L/PTPN2/CFP/FCER1G/RIPK2	9
2	GO:1903320	regulation of protein modification by small protein conjugation or removal	9/227	99/7437	0.00312709	0.0224906	0.0169993	BIRC3/TNFAIP3/TRIB3/PELI1/HSPA5/TNIP1/RIPK2/GNL3/TANK	9
2	GO:0030041	actin filament polymerization	8/227	81/7437	0.00314748	0.0225744	0.0170626	PTK2B/WAS/NCKAP1L/PRKCD/GMFG/HCLS1/CORO1A/GAS7	8
2	GO:0008285	negative regulation of cell population proliferation	15/227	222/7437	0.00317681	0.0227217	0.017174	CD274/TNFAIP3/TNF/PTK2B/SULF1/PTPN2/INHBA/PELI1/IL2RA/LIF/TRIB1/CEBPB/CYP27B1/CDKN2D/BTG3	15
2	GO:0046903	secretion	19/227	314/7437	0.0033096	0.0236061	0.0178424	RSAD2/RHBDF2/TCIRG1/HRH2/TNF/RAB31/IL6/INHBA/STX11/LIF/ITGAM/OSM/SPP1/RAB1A/ABCA1/RAP1B/FCER1G/CORO1A/RAC2	19
2	GO:0043434	response to peptide hormone	9/227	100/7437	0.00334737	0.0236422	0.0178697	JAK2/TRIB3/PTPN1/SLC39A14/RAB31/PID1/PTPN2/PRKCD/USF1	9
2	GO:0052548	regulation of endopeptidase activity	9/227	100/7437	0.00334737	0.0236422	0.0178697	TNF/SERPINB2/PSME2/PICALM/NLRP3/CASP8/RIPK2/CDKN2D/PTGS2	9
2	GO:0010324	membrane invagination	4/227	21/7437	0.00336045	0.0236422	0.0178697	NCKAP1L/ABCA1/FCER1G/RAC2	4
2	GO:0045453	bone resorption	4/227	21/7437	0.00336045	0.0236422	0.0178697	TCIRG1/PTK2B/UBASH3B/SPP1	4
2	GO:0046635	positive regulation of alpha-beta T cell activation	4/227	21/7437	0.00336045	0.0236422	0.0178697	NCKAP1L/IL23A/RIPK2/SASH3	4
2	GO:0002688	regulation of leukocyte chemotaxis	6/227	49/7437	0.00353133	0.0247097	0.0186766	PTK2B/NCKAP1L/RIPOR2/IL23A/SLAMF1/RAC2	6
2	GO:0034341	response to interferon-gamma	6/227	49/7437	0.00353133	0.0247097	0.0186766	CD40/RAB20/PTPN2/GCH1/CCL22/CYP27B1	6
2	GO:0032868	response to insulin	8/227	83/7437	0.00366424	0.0255704	0.0193272	TRIB3/PTPN1/SLC39A14/RAB31/PID1/PTPN2/PRKCD/USF1	8
2	GO:0001773	myeloid dendritic cell activation	3/227	11/7437	0.00386166	0.0263778	0.0199374	DOCK2/RELB/CSF2	3
2	GO:0002360	T cell lineage commitment	3/227	11/7437	0.00386166	0.0263778	0.0199374	LY9/IL6/IL23A	3
2	GO:0010939	regulation of necrotic cell death	3/227	11/7437	0.00386166	0.0263778	0.0199374	BIRC3/PELI1/CASP8	3
2	GO:0042554	superoxide anion generation	3/227	11/7437	0.00386166	0.0263778	0.0199374	PRKCD/NCF2/ITGAM	3
2	GO:0070741	response to interleukin-6	3/227	11/7437	0.00386166	0.0263778	0.0199374	PID1/IL6/PTPN2	3
2	GO:0072538	T-helper 17 type immune response	3/227	11/7437	0.00386166	0.0263778	0.0199374	LY9/IL6/IL23A	3
2	GO:0072539	T-helper 17 cell differentiation	3/227	11/7437	0.00386166	0.0263778	0.0199374	LY9/IL6/IL23A	3
2	GO:1902042	negative regulation of extrinsic apoptotic signaling pathway via death domain receptors	3/227	11/7437	0.00386166	0.0263778	0.0199374	HMGB2/TNFAIP3/ICAM1	3
2	GO:0032755	positive regulation of interleukin-6 production	5/227	35/7437	0.00389572	0.0265402	0.0200602	TNF/MYD88/IL1RAP/FCER1G/RIPK2	5
2	GO:0050728	negative regulation of inflammatory response	6/227	50/7437	0.00391275	0.0265861	0.0200949	AOAH/TNFAIP3/PTPN2/NLRP3/IL2RA/TNFRSF1B	6
2	GO:0030888	regulation of B cell proliferation	4/227	22/7437	0.00401024	0.0269647	0.020381	CD40/NCKAP1L/PELI1/SASH3	4
2	GO:0032613	interleukin-10 production	4/227	22/7437	0.00401024	0.0269647	0.020381	CD274/IL23A/FCER1G/SASH3	4
2	GO:0032653	regulation of interleukin-10 production	4/227	22/7437	0.00401024	0.0269647	0.020381	CD274/IL23A/FCER1G/SASH3	4
2	GO:1904035	regulation of epithelial cell apoptotic process	4/227	22/7437	0.00401024	0.0269647	0.020381	TNFAIP3/CD40/TNF/ICAM1	4
2	GO:0052547	regulation of peptidase activity	9/227	103/7437	0.00408225	0.0273217	0.0206509	TNF/SERPINB2/PSME2/PICALM/NLRP3/CASP8/RIPK2/CDKN2D/PTGS2	9
2	GO:0007169	transmembrane receptor protein tyrosine kinase signaling pathway	15/227	228/7437	0.00408451	0.0273217	0.0206509	RHBDF2/FGF23/PTK2B/SULF1/JAK2/PTPN1/SLC39A14/AREG/PID1/PTPN2/PRKCD/UBASH3B/HBEGF/IQGAP1/SULF2	15
2	GO:0030334	regulation of cell migration	19/227	321/7437	0.00421288	0.028083	0.0212263	HAS2/CD40/TNF/RRAS2/FGF23/PTK2B/SULF1/IL1R1/NCKAP1L/ICAM1/ARHGAP4/RIPOR2/MYD88/HSPA5/IL23A/TRIB1/SLAMF1/CORO1A/RAC2	19
2	GO:0045860	positive regulation of protein kinase activity	11/227	143/7437	0.00422007	0.028083	0.0212263	LCP2/TNF/PTK2B/PTPN1/AREG/FGD2/PRKCD/IL23A/PIK3R5/HBEGF/RIPK2	11
2	GO:0051046	regulation of secretion	13/227	185/7437	0.0042334	0.0280993	0.0212386	RSAD2/RHBDF2/TCIRG1/TNF/IL6/INHBA/LIF/ITGAM/OSM/SPP1/RAP1B/FCER1G/RAC2	13
2	GO:0001890	placenta development	6/227	51/7437	0.00432388	0.0285531	0.0215816	PRDM1/LIF/CSF2/CEBPB/CYP27B1/PTGS2	6
2	GO:2000377	regulation of reactive oxygen species metabolic process	6/227	51/7437	0.00432388	0.0285531	0.0215816	TNF/PTK2B/PID1/PRKCD/GCH1/ITGAM	6
2	GO:0002532	production of molecular mediator involved in inflammatory response	4/227	23/7437	0.00474002	0.030842	0.0233116	TNF/MYD88/FCER1G/IL4R	4
2	GO:0006766	vitamin metabolic process	4/227	23/7437	0.00474002	0.030842	0.0233116	TNF/FGF23/CYP24A1/CYP27B1	4
2	GO:0043507	positive regulation of JUN kinase activity	4/227	23/7437	0.00474002	0.030842	0.0233116	TNF/PTPN1/FGD2/RIPK2	4
2	GO:2001238	positive regulation of extrinsic apoptotic signaling pathway	4/227	23/7437	0.00474002	0.030842	0.0233116	TNF/TNFRSF12A/INHBA/ATF3	4
2	GO:0031589	cell-substrate adhesion	10/227	125/7437	0.0047575	0.030842	0.0233116	PTK2B/MMP12/JAK2/TNFRSF12A/BCL2L11/ITGB2/RAB1A/ITGAL/CORO1A/RAC2	10
2	GO:0010950	positive regulation of endopeptidase activity	6/227	52/7437	0.00476605	0.030842	0.0233116	TNF/PSME2/PICALM/NLRP3/CASP8/RIPK2	6
2	GO:0032640	tumor necrosis factor production	6/227	52/7437	0.00476605	0.030842	0.0233116	TNFAIP3/MYD88/IL23A/FCER1G/RIPK2/SASH3	6
2	GO:0032680	regulation of tumor necrosis factor production	6/227	52/7437	0.00476605	0.030842	0.0233116	TNFAIP3/MYD88/IL23A/FCER1G/RIPK2/SASH3	6
2	GO:0030335	positive regulation of cell migration	13/227	188/7437	0.00484935	0.0313026	0.0236597	HAS2/CD40/RRAS2/PTK2B/IL1R1/NCKAP1L/ICAM1/RIPOR2/HSPA5/IL23A/SLAMF1/CORO1A/RAC2	13
2	GO:0001818	negative regulation of cytokine production	8/227	87/7437	0.00489292	0.0314267	0.0237535	CD274/TNFAIP3/TNF/NCKAP1L/NLRP3/IL23A/RELB/SLAMF1	8
2	GO:2001234	negative regulation of apoptotic signaling pathway	8/227	87/7437	0.00489292	0.0314267	0.0237535	HMGB2/TNFAIP3/TNF/PTPN1/ICAM1/CSF2/CDKN2D/PTGS2	8
2	GO:0043254	regulation of protein-containing complex assembly	12/227	167/7437	0.0049524	0.0317298	0.0239827	TNF/PTK2B/WAS/NCKAP1L/PRKCD/SLC39A12/GMFG/HCLS1/CSF2/ABCA1/RAP1B/CORO1A	12
2	GO:0007173	epidermal growth factor receptor signaling pathway	5/227	37/7437	0.00497902	0.0318214	0.0240519	RHBDF2/AREG/PTPN2/HBEGF/IQGAP1	5
2	GO:0046627	negative regulation of insulin receptor signaling pathway	3/227	12/7437	0.00503388	0.0319348	0.0241376	PID1/PTPN2/PRKCD	3
2	GO:0061098	positive regulation of protein tyrosine kinase activity	3/227	12/7437	0.00503388	0.0319348	0.0241376	PTPN1/AREG/HBEGF	3
2	GO:1900077	negative regulation of cellular response to insulin stimulus	3/227	12/7437	0.00503388	0.0319348	0.0241376	PID1/PTPN2/PRKCD	3
2	GO:0033135	regulation of peptidyl-serine phosphorylation	6/227	53/7437	0.00524062	0.0330838	0.0250061	TNF/LIF/HCLS1/OSM/RIPK2/PTGS2	6
2	GO:0048771	tissue remodeling	6/227	53/7437	0.00524062	0.0330838	0.0250061	TCIRG1/PTK2B/UBASH3B/LIF/IL23A/SPP1	6
2	GO:0007167	enzyme linked receptor protein signaling pathway	20/227	353/7437	0.00546112	0.0343792	0.0259852	RHBDF2/FGF23/PTK2B/SULF1/JAK2/PTPN1/SLC39A14/AREG/PID1/HIVEP1/PTPN2/PRKCD/INHBA/MTMR4/UBASH3B/LIF/HSPA5/HBEGF/IQGAP1/SULF2	20
2	GO:0051094	positive regulation of developmental process	23/227	427/7437	0.00547245	0.0343792	0.0259852	HMGB2/CD40/TNF/PTK2B/TNFRSF12A/NCKAP1L/INHBA/CASP8/MAPK14/LIF/TNFRSF1B/IL23A/HCLS1/IL1RAP/CSF2/CEBPB/MAPK6/CYP27B1/RIPK2/PTGS2/IL7R/CD53/SASH3	23
2	GO:0045670	regulation of osteoclast differentiation	4/227	24/7437	0.00555401	0.0346388	0.0261814	TNF/UBASH3B/IL23A/CEBPB	4
2	GO:0061028	establishment of endothelial barrier	4/227	24/7437	0.00555401	0.0346388	0.0261814	TNF/ICAM1/MYD88/RAP1B	4
2	GO:0061097	regulation of protein tyrosine kinase activity	4/227	24/7437	0.00555401	0.0346388	0.0261814	PTPN1/AREG/PTPN2/HBEGF	4
2	GO:0008645	hexose transmembrane transport	5/227	38/7437	0.00559381	0.0348029	0.0263055	LOC489640/TNF/TRIB3/SLC2A3/PID1	5
2	GO:0018193	peptidyl-amino acid modification	23/227	428/7437	0.00562794	0.0349311	0.0264023	SETDB2/CD40/TNF/PTK2B/JAK2/PTPN1/PTPRC/P4HA1/AREG/PTPN2/PRKCD/ERO1A/LIF/IL23A/HCLS1/OSM/CSF2/HBEGF/TOP1/RIPK2/GNL3/PTGS2/MAST2	23
2	GO:0045619	regulation of lymphocyte differentiation	7/227	71/7437	0.00569432	0.0352584	0.0266497	PRDM1/NCKAP1L/PTPN2/IL23A/RIPK2/IL7R/SASH3	7
2	GO:0010952	positive regulation of peptidase activity	6/227	54/7437	0.00574895	0.0354267	0.0267769	TNF/PSME2/PICALM/NLRP3/CASP8/RIPK2	6
2	GO:2001235	positive regulation of apoptotic signaling pathway	6/227	54/7437	0.00574895	0.0354267	0.0267769	TNF/TNFRSF12A/PTPN2/PRKCD/INHBA/ATF3	6
2	GO:0090066	regulation of anatomical structure size	13/227	192/7437	0.00578081	0.0355382	0.0268612	HRH2/VAV1/PTK2B/WAS/TNFRSF12A/HTR7/NCKAP1L/PICALM/PRKCD/GMFG/HCLS1/CORO1A/IL7R	13
2	GO:0045055	regulated exocytosis	7/227	72/7437	0.0061481	0.0377064	0.0285	RAB31/STX11/ITGAM/RAP1B/FCER1G/CORO1A/RAC2	7
2	GO:0030162	regulation of proteolysis	14/227	216/7437	0.00622346	0.0378897	0.0286386	TNF/PTK2B/SERPINB2/PSME2/PICALM/NLRP3/CASP8/TNFRSF1B/TRIB1/TNIP1/RIPK2/CDKN2D/PTGS2/TANK	14
2	GO:0048871	multicellular organismal homeostasis	12/227	172/7437	0.00625061	0.0378897	0.0286386	TCIRG1/HAS2/TNF/PTK2B/UGCG/UBASH3B/SPP1/CEBPB/IL1A/CORO1A/PTGS2/SASH3	12
2	GO:0015749	monosaccharide transmembrane transport	5/227	39/7437	0.00626032	0.0378897	0.0286386	LOC489640/TNF/TRIB3/SLC2A3/PID1	5
2	GO:0034219	carbohydrate transmembrane transport	5/227	39/7437	0.00626032	0.0378897	0.0286386	LOC489640/TNF/TRIB3/SLC2A3/PID1	5
2	GO:2001237	negative regulation of extrinsic apoptotic signaling pathway	5/227	39/7437	0.00626032	0.0378897	0.0286386	HMGB2/TNFAIP3/TNF/ICAM1/CSF2	5
2	GO:0001933	negative regulation of protein phosphorylation	9/227	110/7437	0.00628802	0.0378897	0.0286386	TNFAIP3/TRIB3/PTPN1/PTPRC/PID1/PTPN2/PRKCD/DUSP5/UBASH3B	9
2	GO:0050921	positive regulation of chemotaxis	6/227	55/7437	0.00629237	0.0378897	0.0286386	PTK2B/NCKAP1L/RIPOR2/IL23A/SLAMF1/RAC2	6
2	GO:0044089	positive regulation of cellular component biogenesis	13/227	194/7437	0.00629745	0.0378897	0.0286386	SETDB2/TNF/PTK2B/WAS/NCKAP1L/RIPOR2/GMFG/IL1RAP/CSF2/ABCA1/RAP1B/CORO1A/RAC2	13
2	GO:0032535	regulation of cellular component size	11/227	151/7437	0.006346	0.0378897	0.0286386	VAV1/PTK2B/WAS/TNFRSF12A/NCKAP1L/PICALM/PRKCD/GMFG/HCLS1/CORO1A/IL7R	11
2	GO:0040012	regulation of locomotion	20/227	358/7437	0.00636625	0.0378897	0.0286386	HAS2/CD40/TNF/RRAS2/FGF23/PTK2B/SULF1/IL1R1/NCKAP1L/PTPN2/ICAM1/ARHGAP4/RIPOR2/MYD88/HSPA5/IL23A/TRIB1/SLAMF1/CORO1A/RAC2	20
2	GO:0030279	negative regulation of ossification	3/227	13/7437	0.00639811	0.0378897	0.0286386	FGF23/PTK2B/CHSY1	3
2	GO:0034405	response to fluid shear stress	3/227	13/7437	0.00639811	0.0378897	0.0286386	HAS2/PTK2B/PTGS2	3
2	GO:0043300	regulation of leukocyte degranulation	3/227	13/7437	0.00639811	0.0378897	0.0286386	ITGAM/FCER1G/RAC2	3
2	GO:0045648	positive regulation of erythrocyte differentiation	3/227	13/7437	0.00639811	0.0378897	0.0286386	HMGB2/NCKAP1L/INHBA	3
2	GO:0048010	vascular endothelial growth factor receptor signaling pathway	3/227	13/7437	0.00639811	0.0378897	0.0286386	PTK2B/SULF1/PTPN1	3
2	GO:0046173	polyol biosynthetic process	4/227	25/7437	0.0064563	0.0381469	0.0288329	PTK2B/PTAFR/GCH1/CYP27B1	4
2	GO:0051051	negative regulation of transport	10/227	131/7437	0.00660446	0.0389332	0.0294272	RSAD2/RHBDF2/TNF/PTK2B/PID1/PICALM/LIF/OSM/RAP1B/CORO1A	10
2	GO:0045621	positive regulation of lymphocyte differentiation	5/227	40/7437	0.0069807	0.040964	0.0309623	NCKAP1L/IL23A/RIPK2/IL7R/SASH3	5
2	GO:1903531	negative regulation of secretion by cell	5/227	40/7437	0.0069807	0.040964	0.0309623	RSAD2/RHBDF2/LIF/OSM/RAP1B	5
2	GO:0002429	immune response-activating cell surface receptor signaling pathway	7/227	74/7437	0.00713597	0.0415261	0.0313871	LCP2/PTPRC/PDE4B/NCKAP1L/PTPN2/FCER1G/RIPK2	7
2	GO:0002757	immune response-activating signal transduction	7/227	74/7437	0.00713597	0.0415261	0.0313871	LCP2/PTPRC/PDE4B/NCKAP1L/PTPN2/FCER1G/RIPK2	7
2	GO:0030833	regulation of actin filament polymerization	7/227	74/7437	0.00713597	0.0415261	0.0313871	PTK2B/WAS/NCKAP1L/PRKCD/GMFG/HCLS1/CORO1A	7
2	GO:2000147	positive regulation of cell motility	13/227	197/7437	0.00714082	0.0415261	0.0313871	HAS2/CD40/RRAS2/PTK2B/IL1R1/NCKAP1L/ICAM1/RIPOR2/HSPA5/IL23A/SLAMF1/CORO1A/RAC2	13
2	GO:0051270	regulation of cellular component movement	20/227	362/7437	0.00717604	0.0416371	0.031471	HAS2/CD40/TNF/RRAS2/FGF23/PTK2B/SULF1/PDE4B/IL1R1/NCKAP1L/ICAM1/ARHGAP4/RIPOR2/MYD88/HSPA5/IL23A/TRIB1/SLAMF1/CORO1A/RAC2	20
2	GO:0030101	natural killer cell activation	4/227	26/7437	0.00745079	0.0425618	0.0321699	PRDM1/IL23A/SLAMF1/CORO1A	4
2	GO:0032945	negative regulation of mononuclear cell proliferation	4/227	26/7437	0.00745079	0.0425618	0.0321699	CD274/PELI1/IL2RA/CEBPB	4
2	GO:0043506	regulation of JUN kinase activity	4/227	26/7437	0.00745079	0.0425618	0.0321699	TNF/PTPN1/FGD2/RIPK2	4
2	GO:0050672	negative regulation of lymphocyte proliferation	4/227	26/7437	0.00745079	0.0425618	0.0321699	CD274/PELI1/IL2RA/CEBPB	4
2	GO:0070059	intrinsic apoptotic signaling pathway in response to endoplasmic reticulum stress	4/227	26/7437	0.00745079	0.0425618	0.0321699	PTPN1/PTPN2/ERO1A/CEBPB	4
2	GO:0070664	negative regulation of leukocyte proliferation	4/227	26/7437	0.00745079	0.0425618	0.0321699	CD274/PELI1/IL2RA/CEBPB	4
2	GO:2000379	positive regulation of reactive oxygen species metabolic process	4/227	26/7437	0.00745079	0.0425618	0.0321699	TNF/PID1/PRKCD/ITGAM	4
2	GO:0051092	positive regulation of NF-kappaB transcription factor activity	6/227	57/7437	0.00748991	0.0426908	0.0322674	CD40/TNF/NLRP3/MYD88/IL1RAP/RIPK2	6
2	GO:2000145	regulation of cell motility	19/227	340/7437	0.00774022	0.0438268	0.0331261	HAS2/CD40/TNF/RRAS2/FGF23/PTK2B/SULF1/IL1R1/NCKAP1L/ICAM1/ARHGAP4/RIPOR2/MYD88/HSPA5/IL23A/TRIB1/SLAMF1/CORO1A/RAC2	19
2	GO:0051272	positive regulation of cellular component movement	13/227	199/7437	0.00775121	0.0438268	0.0331261	HAS2/CD40/RRAS2/PTK2B/IL1R1/NCKAP1L/ICAM1/RIPOR2/HSPA5/IL23A/SLAMF1/CORO1A/RAC2	13
2	GO:0030838	positive regulation of actin filament polymerization	5/227	41/7437	0.00775711	0.0438268	0.0331261	PTK2B/WAS/NCKAP1L/GMFG/CORO1A	5
2	GO:0038127	ERBB signaling pathway	5/227	41/7437	0.00775711	0.0438268	0.0331261	RHBDF2/AREG/PTPN2/HBEGF/IQGAP1	5
2	GO:0010942	positive regulation of cell death	12/227	177/7437	0.00780507	0.0440015	0.0332581	CD274/ALDH1A3/CD40/TNF/TNFRSF12A/PICALM/PTPN2/PRKCD/INHBA/BCL2L11/RIPK2/ATF3	12
2	GO:0002063	chondrocyte development	3/227	14/7437	0.00796174	0.0444961	0.0336319	SULF1/CHSY1/SULF2	3
2	GO:0010573	vascular endothelial growth factor production	3/227	14/7437	0.00796174	0.0444961	0.0336319	TNF/IL6/SULF2	3
2	GO:0097028	dendritic cell differentiation	3/227	14/7437	0.00796174	0.0444961	0.0336319	RELB/CSF2/CEBPB	3
2	GO:2000008	regulation of protein localization to cell surface	3/227	14/7437	0.00796174	0.0444961	0.0336319	TNF/PICALM/FCER1G	3
2	GO:0051090	regulation of DNA-binding transcription factor activity	11/227	156/7437	0.00805233	0.0449052	0.0339411	TNFAIP3/CD40/TNF/PELI1/NLRP3/MAPK14/MYD88/HCLS1/TRIB1/IL1RAP/RIPK2	11
2	GO:0008154	actin polymerization or depolymerization	8/227	95/7437	0.00827303	0.045839	0.0346469	PTK2B/WAS/NCKAP1L/PRKCD/GMFG/HCLS1/CORO1A/GAS7	8
2	GO:0032271	regulation of protein polymerization	8/227	95/7437	0.00827303	0.045839	0.0346469	PTK2B/WAS/NCKAP1L/PRKCD/SLC39A12/GMFG/HCLS1/CORO1A	8
2	GO:0043405	regulation of MAP kinase activity	8/227	95/7437	0.00827303	0.045839	0.0346469	TNF/PTPN1/FGD2/PRKCD/DUSP5/PIK3R5/TRIB1/RIPK2	8
2	GO:0040017	positive regulation of locomotion	13/227	201/7437	0.00840218	0.0464549	0.0351125	HAS2/CD40/RRAS2/PTK2B/IL1R1/NCKAP1L/ICAM1/RIPOR2/HSPA5/IL23A/SLAMF1/CORO1A/RAC2	13
2	GO:0001503	ossification	10/227	136/7437	0.00853332	0.0466243	0.0352405	TCIRG1/TNF/FGF23/PTK2B/CHSY1/CYP24A1/MMP9/SPP1/CEBPB/CYP27B1	10
2	GO:0032623	interleukin-2 production	4/227	27/7437	0.00854116	0.0466243	0.0352405	TNFAIP3/PDE4B/RIPK2/SASH3	4
2	GO:0032663	regulation of interleukin-2 production	4/227	27/7437	0.00854116	0.0466243	0.0352405	TNFAIP3/PDE4B/RIPK2/SASH3	4
2	GO:0033627	cell adhesion mediated by integrin	4/227	27/7437	0.00854116	0.0466243	0.0352405	NCKAP1L/ICAM1/ITGB2/LIF	4
2	GO:0042058	regulation of epidermal growth factor receptor signaling pathway	4/227	27/7437	0.00854116	0.0466243	0.0352405	RHBDF2/AREG/PTPN2/HBEGF	4
2	GO:1904019	epithelial cell apoptotic process	4/227	27/7437	0.00854116	0.0466243	0.0352405	TNFAIP3/CD40/TNF/ICAM1	4
4	GO:0044782	cilium organization	65/423	162/7437	1.13047e-39	2.76286e-36	2.656e-36	DNAI3/HOATZ/CFAP221/SPAG17/MEIG1/ROPN1/RSPH1/TEKT4/DNAAF1/TRAF3IP1/MCIDAS/TMEM67/CCDC65/DNAH7/KIF27/FOXJ1/TMEM138/CCDC40/CFAP69/DAW1/ENO4/TEKT3/IFT46/RPGRIP1L/TTC8/TTC26/JHY/SPEF2/CFAP52/KIF19/TCTN1/FAM161B/DNAAF5/INTU/DNAAF6/ZMYND10/DRC1/NME5/WDR35/TEKT1/SPEF1/SPATA6/IQCG/TMEM17/FAM161A/RSPH4A/ONECUT1/RILP/IFT88/RFX3/IFT122/DNAAF4/ARMC2/SLC9A3R1/ARMC9/BBS1/IFT172/CCP110/FHDC1/DYNC2I1/CATIP/CDK10…	65
4	GO:0060271	cilium assembly	56/423	145/7437	3.99765e-33	4.88513e-30	4.69619e-30	DNAI3/HOATZ/CFAP221/SPAG17/MEIG1/RSPH1/TEKT4/DNAAF1/TRAF3IP1/MCIDAS/TMEM67/CCDC65/DNAH7/KIF27/FOXJ1/TMEM138/CCDC40/CFAP69/DAW1/TEKT3/IFT46/RPGRIP1L/TTC8/TTC26/JHY/SPEF2/CFAP52/TCTN1/DNAAF5/INTU/DNAAF6/ZMYND10/DRC1/NME5/WDR35/TEKT1/SPEF1/SPATA6/IQCG/TMEM17/FAM161A/RSPH4A/ONECUT1/RILP/IFT88/RFX3/IFT122/DNAAF4/ARMC2/ARMC9/BBS1/IFT172/FHDC1/CDK10/DCDC2/DYNLL2	56
4	GO:0120031	plasma membrane bounded cell projection assembly	62/423	208/7437	3.38684e-29	1.71654e-26	1.65015e-26	AIF1L/DNAI3/HOATZ/CFAP221/SPAG17/MEIG1/RSPH1/TEKT4/DNAAF1/TRAF3IP1/MCIDAS/TMEM67/CCDC65/DNAH7/KIF27/FOXJ1/TMEM138/CCDC40/CFAP69/DAW1/TEKT3/IFT46/RPGRIP1L/TTC8/TTC26/JHY/SPEF2/CFAP52/TCTN1/DNAAF5/INTU/DNAAF6/ZMYND10/DRC1/NME5/WDR35/TEKT1/SPEF1/SPATA6/IQCG/TMEM17/FAM161A/RSPH4A/ONECUT1/KLF5/RILP/IFT88/RFX3/IFT122/DNAAF4/ARMC2/SLC9A3R1/ARMC9/BBS1/IFT172/FHDC1/CDH13/CDK10/LPAR3/DCDC2/DYNLL2/ABITRAM	62
4	GO:0030031	cell projection assembly	63/423	215/7437	3.41681e-29	1.71654e-26	1.65015e-26	AIF1L/DNAI3/HOATZ/CFAP221/SPAG17/MEIG1/RSPH1/TEKT4/DNAAF1/TRAF3IP1/MCIDAS/TMEM67/CCDC65/DNAH7/KIF27/FOXJ1/RHOV/TMEM138/CCDC40/CFAP69/DAW1/TEKT3/IFT46/RPGRIP1L/TTC8/TTC26/JHY/SPEF2/CFAP52/TCTN1/DNAAF5/INTU/DNAAF6/ZMYND10/DRC1/NME5/WDR35/TEKT1/SPEF1/SPATA6/IQCG/TMEM17/FAM161A/RSPH4A/ONECUT1/KLF5/RILP/IFT88/RFX3/IFT122/DNAAF4/ARMC2/SLC9A3R1/ARMC9/BBS1/IFT172/FHDC1/CDH13/CDK10/LPAR3/DCDC2/DYNLL2/ABIT…	63
4	GO:0003341	cilium movement	40/423	80/7437	3.51173e-29	1.71654e-26	1.65015e-26	DNAI3/HOATZ/CFAP221/SPAG17/MEIG1/ROPN1/TEKT4/ENKUR/DNAH12/DNAAF1/TTLL9/CCDC65/DNAH7/KIF27/CCDC40/CFAP69/DAW1/ENO4/TEKT3/JHY/SPEF2/DNAAF5/DNAAF6/ZMYND10/DRC1/NME5/TEKT1/SPEF1/IQCG/RSPH4A/ZBBX/NEK10/CFAP298/RFX3/DNAAF4/ARMC2/SLC9A3R1/BBS1/DRC7/CATSPER3	40
4	GO:0007018	microtubule-based movement	54/423	159/7437	1.19876e-28	4.88295e-26	4.69409e-26	DNAI3/HOATZ/CFAP221/SPAG17/MEIG1/ROPN1/TEKT4/ENKUR/DNAH12/DNAAF1/TTLL9/TRAF3IP1/CCDC65/DNAH7/KIF27/DYNLRB2/CCDC40/KIF21A/CFAP69/DAW1/ENO4/TEKT3/IFT46/TTC26/JHY/SPEF2/KIF19/DNAAF5/DNAAF6/ZMYND10/DRC1/NME5/WDR35/TEKT1/SPEF1/IQCG/RSPH4A/KATNB1/KIF9/ZBBX/NEK10/CFAP298/IFT88/RFX3/IFT122/DNAAF4/ARMC2/SLC9A3R1/BBS1/IFT172/DRC7/DYNC2I1/IFT27/CATSPER3	54
4	GO:0007017	microtubule-based process	81/423	378/7437	3.90601e-27	1.36375e-24	1.31101e-24	DNAI3/HOATZ/LOC483842/MAP9/CFAP221/SPAG17/MEIG1/EFHC1/ROPN1/RSPH1/TEKT4/ENKUR/DNAH12/DNAAF1/TTLL9/TRAF3IP1/ANKRD53/CCDC65/DNAH7/KIF27/FOXJ1/CAPN6/DYNLRB2/ULK4/CCDC40/KIF21A/CFAP69/DAW1/ENO4/TEKT3/DNAL4/IFT46/TTLL1/TTC26/CCSER2/JHY/SPEF2/KIF19/MAP7/DNAAF5/DNAAF6/ZMYND10/DRC1/NME5/WDR35/TEKT1/SPEF1/IQCG/RSPH4A/KATNB1/STMND1/KIF9/LOC477570/ZBBX/NEK10/LOC608051/CCDC170/CFAP298/CRYAA/IFT88/RFX3/MAP1A/…	81
4	GO:0035082	axoneme assembly	23/423	35/7437	5.73665e-21	1.75255e-18	1.68476e-18	DNAI3/HOATZ/SPAG17/MEIG1/RSPH1/DNAAF1/CCDC65/DNAH7/FOXJ1/CCDC40/CFAP69/DAW1/TTC26/JHY/SPEF2/DNAAF5/DNAAF6/ZMYND10/DRC1/SPEF1/IQCG/DNAAF4/ARMC2	23
4	GO:0001578	microtubule bundle formation	25/423	47/7437	1.74367e-19	4.73504e-17	4.5519e-17	DNAI3/HOATZ/SPAG17/MEIG1/RSPH1/DNAAF1/CCDC65/DNAH7/FOXJ1/CAPN6/CCDC40/CFAP69/DAW1/TTC26/CCSER2/JHY/SPEF2/DNAAF5/DNAAF6/ZMYND10/DRC1/SPEF1/IQCG/DNAAF4/ARMC2	25
4	GO:0070925	organelle assembly	66/423	366/7437	7.55773e-18	1.84711e-15	1.77567e-15	DNAI3/HOATZ/LOC483842/MAP9/CFAP221/SPAG17/MEIG1/RSPH1/TEKT4/DNAAF1/TRAF3IP1/MCIDAS/TMEM67/SPACA1/CCDC65/DNAH7/KIF27/FOXJ1/TMEM138/CCDC40/CFAP69/DAW1/TEKT3/IFT46/RPGRIP1L/TTC8/TTC26/JHY/SPEF2/CFAP52/TCTN1/DNAAF5/INTU/DNAAF6/ZMYND10/DRC1/NME5/WDR35/TEKT1/SPEF1/SPATA6/TNNT3/IQCG/TMEM17/FAM161A/RSPH4A/KIF9/ONECUT1/RILP/IFT88/RFX3/ARHGEF5/IFT122/DNAAF4/ARMC2/ELAPOR1/ARMC9/BBS1/SPICE1/IFT172/CCP110/FHD…	66
4	GO:0001539	cilium or flagellum-dependent cell motility	24/423	59/7437	2.36647e-15	4.81972e-13	4.6333e-13	DNAI3/HOATZ/MEIG1/EFHC1/ROPN1/TEKT4/ENKUR/TTLL9/CCDC65/CCDC40/CFAP69/ENO4/TEKT3/SPEF2/DNAAF6/DRC1/TEKT1/IQCG/RSPH4A/RFX3/ARMC2/BBS1/DRC7/CATSPER3	24
4	GO:0060285	cilium-dependent cell motility	24/423	59/7437	2.36647e-15	4.81972e-13	4.6333e-13	DNAI3/HOATZ/MEIG1/EFHC1/ROPN1/TEKT4/ENKUR/TTLL9/CCDC65/CCDC40/CFAP69/ENO4/TEKT3/SPEF2/DNAAF6/DRC1/TEKT1/IQCG/RSPH4A/RFX3/ARMC2/BBS1/DRC7/CATSPER3	24
4	GO:0000226	microtubule cytoskeleton organization	50/423	263/7437	1.28054e-14	2.40741e-12	2.3143e-12	DNAI3/HOATZ/LOC483842/MAP9/SPAG17/MEIG1/EFHC1/RSPH1/DNAAF1/TRAF3IP1/ANKRD53/CCDC65/DNAH7/FOXJ1/CAPN6/ULK4/CCDC40/CFAP69/DAW1/TTLL1/TTC26/CCSER2/JHY/SPEF2/KIF19/MAP7/DNAAF5/DNAAF6/ZMYND10/DRC1/SPEF1/IQCG/KATNB1/STMND1/LOC477570/LOC608051/CCDC170/MAP1A/DIXDC1/DNAAF4/ARMC2/BBS1/SPICE1/IFT172/WDR73/CCP110/SDCCAG8/TTLL5/TOGARAM1/CLIP3	50
4	GO:0060294	cilium movement involved in cell motility	20/423	55/7437	6.41981e-12	1.12072e-09	1.07737e-09	DNAI3/HOATZ/MEIG1/ROPN1/TEKT4/ENKUR/TTLL9/CCDC40/CFAP69/ENO4/TEKT3/SPEF2/DNAAF6/TEKT1/IQCG/RSPH4A/ARMC2/BBS1/DRC7/CATSPER3	20
4	GO:0070286	axonemal dynein complex assembly	11/423	15/7437	1.97303e-11	3.21473e-09	3.09039e-09	DNAI3/DNAAF1/CCDC65/DNAH7/CCDC40/DAW1/DNAAF5/DNAAF6/ZMYND10/DRC1/DNAAF4	11
4	GO:0003351	epithelial cilium movement involved in extracellular fluid movement	10/423	14/7437	2.60535e-10	3.97967e-08	3.82575e-08	SPAG17/KIF27/CCDC40/DAW1/JHY/NME5/NEK10/RFX3/DNAAF4/SLC9A3R1	10
4	GO:0044458	motile cilium assembly	9/423	11/7437	2.85132e-10	4.0992e-08	3.94065e-08	CFAP221/DNAAF1/MCIDAS/FOXJ1/CCDC40/JHY/INTU/ZMYND10/SPATA6	9
4	GO:0030317	flagellated sperm motility	17/423	50/7437	8.59039e-10	1.105e-07	1.06226e-07	HOATZ/MEIG1/ROPN1/TEKT4/ENKUR/TTLL9/CCDC40/CFAP69/ENO4/TEKT3/SPEF2/DNAAF6/TEKT1/IQCG/ARMC2/DRC7/CATSPER3	17
4	GO:0097722	sperm motility	17/423	50/7437	8.59039e-10	1.105e-07	1.06226e-07	HOATZ/MEIG1/ROPN1/TEKT4/ENKUR/TTLL9/CCDC40/CFAP69/ENO4/TEKT3/SPEF2/DNAAF6/TEKT1/IQCG/ARMC2/DRC7/CATSPER3	17
4	GO:0006858	extracellular transport	10/423	17/7437	4.33345e-09	5.29547e-07	5.09066e-07	SPAG17/KIF27/CCDC40/DAW1/JHY/NME5/NEK10/RFX3/DNAAF4/SLC9A3R1	10
4	GO:0099111	microtubule-based transport	19/423	70/7437	6.34387e-09	7.38306e-07	7.09751e-07	SPAG17/TRAF3IP1/KIF27/CCDC40/DAW1/IFT46/TTC26/JHY/NME5/WDR35/NEK10/IFT88/RFX3/IFT122/DNAAF4/SLC9A3R1/IFT172/DYNC2I1/IFT27	19
4	GO:0042073	intraciliary transport	9/423	17/7437	9.26037e-08	1.02874e-05	9.88954e-06	TRAF3IP1/IFT46/TTC26/WDR35/IFT88/IFT122/IFT172/DYNC2I1/IFT27	9
4	GO:0090596	sensory organ morphogenesis	19/423	89/7437	4.13437e-07	4.39322e-05	4.2233e-05	WHRN/PRRX1/SIX2/SIX1/COL2A1/OTX1/TSHR/TTC8/INTU/FOXI1/SOX9/EYA1/HCN1/CRYAA/FSCN2/SLC9A3R1/IFT172/FZD3/COL8A2	19
4	GO:0098840	protein transport along microtubule	9/423	20/7437	5.48611e-07	5.36322e-05	5.15579e-05	TRAF3IP1/IFT46/TTC26/WDR35/IFT88/IFT122/IFT172/DYNC2I1/IFT27	9
4	GO:0099118	microtubule-based protein transport	9/423	20/7437	5.48611e-07	5.36322e-05	5.15579e-05	TRAF3IP1/IFT46/TTC26/WDR35/IFT88/IFT122/IFT172/DYNC2I1/IFT27	9
4	GO:0035725	sodium ion transmembrane transport	13/423	47/7437	1.29153e-06	0.000121404	0.000116709	FGF14/CNTD1/SLC6A17/SCNN1B/FXYD2/SCNN1G/SLC6A1/SCN7A/SLC6A9/SCN1B/SLC9A3R1/SLC5A1/SCN2A	13
4	GO:0007286	spermatid development	16/423	71/7437	1.59863e-06	0.000144705	0.000139109	MEIG1/ROPN1/RSPH1/SPACA1/DPY19L2/PACRG/HSPA2/CFAP69/TTC26/SPEF2/NME5/IQCG/STRBP/ARMC2/CFTR/CATSPER3	16
4	GO:0006814	sodium ion transport	16/423	72/7437	1.94985e-06	0.000170194	0.000163611	FGF14/CNTD1/SLC6A17/SLC5A5/CNTN1/SCNN1B/FXYD2/SCNN1G/SLC6A1/SCN7A/SLC6A9/SCN1B/SLC9A3R1/SLC5A1/SCN2A/CATSPER3	16
4	GO:0048515	spermatid differentiation	16/423	73/7437	2.36898e-06	0.000199648	0.000191926	MEIG1/ROPN1/RSPH1/SPACA1/DPY19L2/PACRG/HSPA2/CFAP69/TTC26/SPEF2/NME5/IQCG/STRBP/ARMC2/CFTR/CATSPER3	16
4	GO:0042471	ear morphogenesis	12/423	43/7437	2.99816e-06	0.00024425	0.000234804	WHRN/PRRX1/SIX2/SIX1/COL2A1/OTX1/TSHR/FOXI1/SOX9/EYA1/SLC9A3R1/FZD3	12
4	GO:0043583	ear development	16/423	76/7437	4.15523e-06	0.000327593	0.000314923	WHRN/PRRX1/SIX2/CYTL1/SIX1/COL2A1/OTX1/TSHR/RPGRIP1L/TTC8/FOXI1/SOX9/EYA1/IFT88/SLC9A3R1/FZD3	16
4	GO:0003352	regulation of cilium movement	7/423	15/7437	7.91822e-06	0.000604754	0.000581364	DNAAF1/CCDC65/CCDC40/CFAP69/DRC1/CFAP298/BBS1	7
4	GO:0042472	inner ear morphogenesis	10/423	33/7437	9.03215e-06	0.000668926	0.000643054	WHRN/PRRX1/SIX1/COL2A1/OTX1/TSHR/FOXI1/SOX9/SLC9A3R1/FZD3	10
4	GO:0061512	protein localization to cilium	8/423	21/7437	1.08202e-05	0.000777785	0.000747702	ROPN1/TTC26/TCTN1/ZMYND10/WDR35/LZTFL1/IFT122/BBS1	8
4	GO:0048839	inner ear development	14/423	66/7437	1.51753e-05	0.00105967	0.00101868	WHRN/PRRX1/CYTL1/SIX1/COL2A1/OTX1/TSHR/RPGRIP1L/TTC8/FOXI1/SOX9/IFT88/SLC9A3R1/FZD3	14
4	GO:1905515	non-motile cilium assembly	8/423	22/7437	1.61652e-05	0.00109744	0.00105499	RPGRIP1L/TTC8/INTU/TMEM17/IFT88/IFT122/BBS1/IFT172	8
4	GO:0007283	spermatogenesis	22/423	146/7437	2.29997e-05	0.00151922	0.00146046	HOATZ/MEIG1/ROPN1/RSPH1/OVOL1/SPACA1/DPY19L2/PACRG/HSPA2/CFAP69/TTC26/SPEF2/SOX9/NME5/SPATA6/IQCG/STRBP/FOXA3/TSGA10/ARMC2/CFTR/CATSPER3	22
4	GO:0060632	regulation of microtubule-based movement	7/423	18/7437	3.37155e-05	0.00216844	0.00208457	DNAAF1/CCDC65/CCDC40/CFAP69/DRC1/CFAP298/BBS1	7
4	GO:0032886	regulation of microtubule-based process	16/423	91/7437	4.53928e-05	0.00284461	0.00273459	MAP9/DNAAF1/TRAF3IP1/ANKRD53/CCDC65/CCDC40/CFAP69/DRC1/SPEF1/KATNB1/STMND1/CFAP298/MAP1A/DIXDC1/BBS1/CLIP3	16
4	GO:0048232	male gamete generation	22/423	153/7437	4.81764e-05	0.00294358	0.00282973	HOATZ/MEIG1/ROPN1/RSPH1/OVOL1/SPACA1/DPY19L2/PACRG/HSPA2/CFAP69/TTC26/SPEF2/SOX9/NME5/SPATA6/IQCG/STRBP/FOXA3/TSGA10/ARMC2/CFTR/CATSPER3	22
4	GO:0007368	determination of left/right symmetry	11/423	48/7437	5.89337e-05	0.00351302	0.00337715	ENKUR/DNAAF1/FOXJ1/CCDC40/DAW1/RPGRIP1L/DRC1/RFX3/LOC609612/DNAAF4/IFT172	11
4	GO:0007423	sensory organ development	25/423	191/7437	7.39384e-05	0.00430251	0.0041361	WHRN/PRRX1/SIX2/CYTL1/SIX1/COL2A1/OTX1/TSHR/RPGRIP1L/TTC8/INTU/FOXI1/SOX9/EYA1/HCN1/CRYAA/IFT88/FSCN2/SLC9A3R1/BFSP1/IFT172/GJA8/TTLL5/FZD3/COL8A2	25
4	GO:0009855	determination of bilateral symmetry	11/423	50/7437	8.78786e-05	0.00499477	0.00480159	ENKUR/DNAAF1/FOXJ1/CCDC40/DAW1/RPGRIP1L/DRC1/RFX3/LOC609612/DNAAF4/IFT172	11
4	GO:0009799	specification of symmetry	11/423	51/7437	0.000106416	0.00591093	0.00568231	ENKUR/DNAAF1/FOXJ1/CCDC40/DAW1/RPGRIP1L/DRC1/RFX3/LOC609612/DNAAF4/IFT172	11
4	GO:0098743	cell aggregation	5/423	11/7437	0.000201822	0.0109612	0.0105373	ACAN/COL2A1/SOX9/BARX2/BPIFA1	5
4	GO:0048562	embryonic organ morphogenesis	17/423	117/7437	0.000304172	0.0161608	0.0155357	WHRN/PRRX1/DNAAF1/SIX2/SIX1/COL2A1/OTX1/TSHR/CCDC40/FOXI1/SOX9/EYA1/CRYAA/LOC609612/SLC9A3R1/IFT172/FZD3	17
4	GO:0007288	sperm axoneme assembly	5/423	12/7437	0.000329895	0.0171545	0.016491	MEIG1/CFAP69/SPEF2/IQCG/ARMC2	5
4	GO:0007281	germ cell development	16/423	109/7437	0.000404452	0.0205934	0.0197969	MEIG1/ROPN1/RSPH1/SPACA1/DPY19L2/PACRG/HSPA2/CFAP69/TTC26/SPEF2/NME5/IQCG/STRBP/ARMC2/CFTR/CATSPER3	16
4	GO:0097435	supramolecular fiber organization	32/423	301/7437	0.000422201	0.0210584	0.0202439	AIF1L/DNAI3/SORBS2/ANKRD53/ACAN/COL2A1/TTC8/KIF19/LIMA1/EFS/SPEF1/TNNT3/SCIN/KATNB1/STMND1/DES/MYO5B/CRYAA/ARHGEF5/MAP1A/FSCN2/BFSP1/IFT172/WDR73/FHDC1/SSH3/APOA1/CATIP/CTNNA3/CLIP3/RHOBTB1/ABITRAM	32
4	GO:0002064	epithelial cell development	14/423	91/7437	0.00056807	0.0277673	0.0266933	TJP3/WHRN/FOXJ1/TMEM79/SLC9A4/ONECUT1/KLF5/CRYAA/RFX3/SPINT2/SLC9A3R1/BFSP1/BMP5/CLDN3	14
4	GO:0060122	inner ear receptor cell stereocilium organization	5/423	14/7437	0.000758312	0.0363395	0.034934	WHRN/TSHR/TTC8/IFT88/SLC9A3R1	5
4	GO:0030855	epithelial cell differentiation	25/423	224/7437	0.000887673	0.0417207	0.040107	TJP3/WHRN/SIX2/OVOL1/EHF/FOXJ1/SIX1/TTC8/TMEM79/INTU/SOX9/SLC9A4/ZNF703/ONECUT1/KLF5/CRYAA/RFX3/ELF3/SPINT2/SLC9A3R1/BFSP1/NKX6-1/AGR2/BMP5/CLDN3	25
4	GO:0051216	cartilage development	12/423	75/7437	0.000973266	0.0448804	0.0431446	PRRX1/SIX2/CYTL1/ACAN/PITX1/COL2A1/SMPD3/SOX9/BMPR1B/BBS1/BARX2/ITGB8	12
4	GO:0060429	epithelium development	38/423	399/7437	0.00108877	0.0491193	0.0472195	TJP3/WHRN/DNAAF1/SIX2/OVOL1/EHF/FOXJ1/SIX1/COL2A1/PAX1/CCDC40/RPGRIP1L/TTC8/JHY/TMEM79/INTU/SOX9/SLC9A4/ZNF703/ONECUT1/SOX10/KLF5/CA9/CRYAA/RFX3/LOC609612/ELF3/SPINT2/SLC9A3R1/BFSP1/IFT172/FRAS1/NKX6-1/AGR2/BMP5/BTRC/FZD3/CLDN3	38
4	GO:0009887	animal organ morphogenesis	34/423	345/7437	0.00110538	0.0491193	0.0472195	WHRN/PRRX1/DNAAF1/SIX2/FOXJ1/ACAN/SIX1/COL2A1/OTX1/TSHR/PAX1/CCDC40/TTC8/JHY/INTU/FOXI1/SMPD3/SOX9/EYA1/INSR/HCN1/CRYAA/LOC609612/BMPR1B/FSCN2/SLC9A3R1/BBS1/IFT172/TNFRSF11B/FRAS1/BARX2/BTRC/FZD3/COL8A2	34
5	GO:0060562	epithelial tube morphogenesis	17/270	122/7437	1.65985e-06	0.00421269	0.00391898	FGFR2/LZTS2/IFT52/TEAD2/FUZ/RGMA/MTSS1/KLHL3/IRX2/GATA3/LMO4/HNF1B/SEMA4C/DLL1/ESRP2/TIE1/DVL1	17
5	GO:0060560	developmental growth involved in morphogenesis	13/270	78/7437	3.79843e-06	0.00482021	0.00448415	PAK6/FGFR2/LZTS2/MAP3K13/SEMA3G/STK11/HNF1B/SEMA4C/SEMA6C/TTL/PRKN/DVL1/SEMA3F	13
5	GO:0072175	epithelial tube formation	11/270	60/7437	8.29408e-06	0.00606996	0.00564677	FGFR2/IFT52/TEAD2/FUZ/RGMA/IRX2/GATA3/LMO4/HNF1B/SEMA4C/DVL1	11
5	GO:1990138	neuron projection extension	10/270	50/7437	9.56653e-06	0.00606996	0.00564677	PAK6/MAP3K13/SEMA3G/STK11/SEMA4C/SEMA6C/TTL/PRKN/DVL1/SEMA3F	10
5	GO:0048588	developmental cell growth	11/270	64/7437	1.58177e-05	0.00787268	0.0073238	PAK6/MAP3K13/SEMA3G/ADRA1A/STK11/SEMA4C/SEMA6C/TTL/PRKN/DVL1/SEMA3F	11
5	GO:0016331	morphogenesis of embryonic epithelium	11/270	66/7437	2.14207e-05	0.00787268	0.0073238	FGFR2/IFT52/TEAD2/FUZ/RGMA/IRX2/GATA3/LMO4/HNF1B/SEMA4C/DVL1	11
5	GO:0001838	embryonic epithelial tube formation	10/270	55/7437	2.32011e-05	0.00787268	0.0073238	IFT52/TEAD2/FUZ/RGMA/IRX2/GATA3/LMO4/HNF1B/SEMA4C/DVL1	10
5	GO:0035148	tube formation	11/270	67/7437	2.48154e-05	0.00787268	0.0073238	FGFR2/IFT52/TEAD2/FUZ/RGMA/IRX2/GATA3/LMO4/HNF1B/SEMA4C/DVL1	11
5	GO:0035239	tube morphogenesis	26/270	303/7437	3.59226e-05	0.0101302	0.00942391	PLXDC1/FGFR2/LZTS2/DCN/JUP/IFT52/TEAD2/FUZ/RGMA/MTSS1/KLHL3/IRX2/GATA3/LMO4/CITED1/HNF1B/SEMA4C/DLL1/ESRP2/EPHB4/BMPR1A/TIE1/EPN1/ADM2/DVL1/EFNB2	26
5	GO:0040013	negative regulation of locomotion	14/270	111/7437	4.39922e-05	0.0111652	0.0103868	IGFBP5/SEMA3G/DCN/JUP/FUZ/GATA3/DPYSL3/SEMA4C/CCDC125/PBLD/SEMA6C/BMPR1A/TIE1/SEMA3F	14
5	GO:1900182	positive regulation of protein localization to nucleus	7/270	29/7437	6.03928e-05	0.0139343	0.0129628	JUP/STK11/MEPCE/PIK3R2/GLIS2/MAVS/KAT7	7
5	GO:0007167	enzyme linked receptor protein signaling pathway	28/270	353/7437	7.33092e-05	0.0155049	0.0144239	BCL9L/FGFR2/IGFBP5/SH2B1/GDF5/FAM83B/DCN/EFNA3/EFNA4/SREBF1/RGMA/NBL1/STK11/PIK3R2/GATA3/PDCD4/CITED1/PTP4A3/AKT1S1/DLL1/BTC/PBLD/PRLR/BAMBI/NPR1/BMPR1A/TIE1/EFNB2	28
5	GO:0072080	nephron tubule development	7/270	32/7437	0.000118619	0.023158	0.0215434	LZTS2/MTSS1/KLHL3/IRX2/GATA3/HNF1B/DLL1	7
5	GO:0061326	renal tubule development	7/270	33/7437	0.000145941	0.026457	0.0246125	LZTS2/MTSS1/KLHL3/IRX2/GATA3/HNF1B/DLL1	7
5	GO:0048675	axon extension	7/270	34/7437	0.000178149	0.0286496	0.0266522	MAP3K13/SEMA3G/SEMA4C/SEMA6C/TTL/DVL1/SEMA3F	7
5	GO:0002009	morphogenesis of an epithelium	18/270	193/7437	0.000212092	0.0286496	0.0266522	FGFR2/IGFBP5/LZTS2/IFT52/TEAD2/FUZ/RGMA/MTSS1/KLHL3/IRX2/GATA3/LMO4/HNF1B/SEMA4C/DLL1/ESRP2/TIE1/DVL1	18
5	GO:0061333	renal tubule morphogenesis	6/270	25/7437	0.000214155	0.0286496	0.0266522	LZTS2/MTSS1/KLHL3/IRX2/GATA3/HNF1B	6
5	GO:0010558	negative regulation of macromolecule biosynthetic process	31/270	437/7437	0.000236133	0.0286496	0.0266522	AR/IRF2BP1/FGFR2/IGFBP5/MECOM/CRYM/FOXP4/CRY2/PAIP2B/PCGF2/CC2D1A/STN1/SREBF1/BHLHE41/SAMD11/PER2/MEPCE/TFAP4/GATA3/PDCD4/CITED1/ZNF10/HNF1B/CHD3/PER3/GLIS2/NIBAN2/PPM1F/KAT7/THRB/PRKN	31
5	GO:0048729	tissue morphogenesis	19/270	214/7437	0.00026907	0.0286496	0.0266522	FGFR2/IGFBP5/LZTS2/IFT52/TEAD2/FUZ/RGMA/MTSS1/KLHL3/IRX2/GATA3/LMO4/HNF1B/SEMA4C/DLL1/ESRP2/BMPR1A/TIE1/DVL1	19
5	GO:0030516	regulation of axon extension	6/270	26/7437	0.000270016	0.0286496	0.0266522	MAP3K13/SEMA3G/SEMA4C/SEMA6C/TTL/SEMA3F	6
5	GO:0051093	negative regulation of developmental process	23/270	286/7437	0.000270217	0.0286496	0.0266522	CNTN4/IGFBP5/SEMA3G/TOB2/GDF5/DCN/RGMA/BHLHE41/ITPKB/C1QL4/STK11/GATA3/PDCD4/CITED1/HNF1B/SEMA4C/DLL1/PBLD/SEMA6C/BMPR1A/TIE1/EPN1/SEMA3F	23
5	GO:1900180	regulation of protein localization to nucleus	8/270	48/7437	0.000290268	0.0286496	0.0266522	LZTS2/JUP/STK11/MEPCE/PIK3R2/GLIS2/MAVS/KAT7	8
5	GO:0045892	negative regulation of transcription, DNA-templated	27/270	364/7437	0.000299803	0.0286496	0.0266522	IRF2BP1/FGFR2/MECOM/CRYM/FOXP4/CRY2/PCGF2/CC2D1A/SREBF1/BHLHE41/SAMD11/PER2/MEPCE/TFAP4/GATA3/PDCD4/CITED1/ZNF10/HNF1B/CHD3/PER3/GLIS2/NIBAN2/PPM1F/KAT7/THRB/PRKN	27
5	GO:0010977	negative regulation of neuron projection development	7/270	37/7437	0.000310592	0.0286496	0.0266522	SEMA3G/RGMA/DPYSL3/SEMA4C/SEMA6C/EFNB2/SEMA3F	7
5	GO:0009890	negative regulation of biosynthetic process	32/270	464/7437	0.000310611	0.0286496	0.0266522	AR/IRF2BP1/FGFR2/IGFBP5/MECOM/CRYM/FOXP4/CRY2/PAIP2B/PCGF2/CC2D1A/STN1/SREBF1/BHLHE41/SAMD11/PER2/MEPCE/TFAP4/GATA3/PDCD4/CITED1/ZNF10/HNF1B/CHD3/PER3/GLIS2/NIBAN2/SLC27A1/PPM1F/KAT7/THRB/PRKN	32
5	GO:0035295	tube development	27/270	366/7437	0.000327327	0.0286496	0.0266522	PLXDC1/FGFR2/IGFBP5/LZTS2/DCN/JUP/IFT52/TEAD2/FUZ/RGMA/MTSS1/KLHL3/IRX2/GATA3/LMO4/CITED1/HNF1B/SEMA4C/DLL1/ESRP2/EPHB4/BMPR1A/TIE1/EPN1/ADM2/DVL1/EFNB2	27
5	GO:1902679	negative regulation of RNA biosynthetic process	27/270	366/7437	0.000327327	0.0286496	0.0266522	IRF2BP1/FGFR2/MECOM/CRYM/FOXP4/CRY2/PCGF2/CC2D1A/SREBF1/BHLHE41/SAMD11/PER2/MEPCE/TFAP4/GATA3/PDCD4/CITED1/ZNF10/HNF1B/CHD3/PER3/GLIS2/NIBAN2/PPM1F/KAT7/THRB/PRKN	27
5	GO:1903507	negative regulation of nucleic acid-templated transcription	27/270	366/7437	0.000327327	0.0286496	0.0266522	IRF2BP1/FGFR2/MECOM/CRYM/FOXP4/CRY2/PCGF2/CC2D1A/SREBF1/BHLHE41/SAMD11/PER2/MEPCE/TFAP4/GATA3/PDCD4/CITED1/ZNF10/HNF1B/CHD3/PER3/GLIS2/NIBAN2/PPM1F/KAT7/THRB/PRKN	27
5	GO:0010975	regulation of neuron projection development	13/270	118/7437	0.00032736	0.0286496	0.0266522	MAP3K13/SEMA3G/RGMA/STK11/GATA3/DPYSL3/STK25/SEMA4C/ARHGAP44/SEMA6C/DVL1/EFNB2/SEMA3F	13
5	GO:0006575	cellular modified amino acid metabolic process	10/270	76/7437	0.000386738	0.0317523	0.0295386	CRYM/LOC610304/DUOX1/GATM/GATA3/SULT1A1/GSTO2/CLIC5/SLC27A1/GSTP1	10
5	GO:0072073	kidney epithelium development	8/270	50/7437	0.000387834	0.0317523	0.0295386	FGFR2/LZTS2/MTSS1/KLHL3/IRX2/GATA3/HNF1B/DLL1	8
5	GO:2000113	negative regulation of cellular macromolecule biosynthetic process	30/270	432/7437	0.000429954	0.0341007	0.0317232	IRF2BP1/FGFR2/IGFBP5/MECOM/CRYM/FOXP4/CRY2/PAIP2B/PCGF2/CC2D1A/STN1/SREBF1/BHLHE41/SAMD11/PER2/MEPCE/TFAP4/GATA3/PDCD4/CITED1/ZNF10/HNF1B/CHD3/PER3/GLIS2/NIBAN2/PPM1F/KAT7/THRB/PRKN	30
5	GO:0009649	entrainment of circadian clock	5/270	19/7437	0.000464826	0.0346504	0.0322346	CRY2/CHRM1/FBXL22/PER2/PER3	5
5	GO:0048638	regulation of developmental growth	12/270	107/7437	0.000469562	0.0346504	0.0322346	FGFR2/MAP3K13/SEMA3G/GDF5/HNF1B/SEMA4C/DLL1/SEMA6C/BMPR1A/TTL/PRKN/SEMA3F	12
5	GO:0031327	negative regulation of cellular biosynthetic process	31/270	455/7437	0.000477842	0.0346504	0.0322346	IRF2BP1/FGFR2/IGFBP5/MECOM/CRYM/FOXP4/CRY2/PAIP2B/PCGF2/CC2D1A/STN1/SREBF1/BHLHE41/SAMD11/PER2/MEPCE/TFAP4/GATA3/PDCD4/CITED1/ZNF10/HNF1B/CHD3/PER3/GLIS2/NIBAN2/SLC27A1/PPM1F/KAT7/THRB/PRKN	31
5	GO:0048589	developmental growth	19/270	225/7437	0.000507156	0.0357545	0.0332618	PAK6/FGFR2/LZTS2/MAP3K13/SEMA3G/GDF5/GAS2/ADRA1A/STK11/GATA3/HNF1B/SEMA4C/DLL1/SEMA6C/BMPR1A/TTL/PRKN/DVL1/SEMA3F	19
5	GO:0072009	nephron epithelium development	7/270	41/7437	0.000599086	0.0403512	0.0375379	LZTS2/MTSS1/KLHL3/IRX2/GATA3/HNF1B/DLL1	7
5	GO:0050673	epithelial cell proliferation	14/270	142/7437	0.000613064	0.0403512	0.0375379	FGFR2/IGFBP5/IRF6/GDF5/IFT52/MTSS1/STK11/GATA3/HNF1B/ESRP2/PBLD/BMPR1A/BAD/TIE1	14
5	GO:0061564	axon development	15/270	159/7437	0.000630412	0.0403512	0.0375379	CNTN4/FGFR2/MAP3K13/SEMA3G/EFNA3/EFNA4/RGMA/STK11/GATA3/STK25/SEMA4C/SEMA6C/TTL/DVL1/SEMA3F	15
5	GO:0016049	cell growth	14/270	143/7437	0.000657925	0.0403512	0.0375379	PAK6/IGFBP5/KAZALD1/MAP3K13/SEMA3G/FAM107A/ADRA1A/STK11/SEMA4C/SEMA6C/TTL/PRKN/DVL1/SEMA3F	14
5	GO:0048841	regulation of axon extension involved in axon guidance	4/270	12/7437	0.00066775	0.0403512	0.0375379	SEMA3G/SEMA4C/SEMA6C/SEMA3F	4
5	GO:0048843	negative regulation of axon extension involved in axon guidance	4/270	12/7437	0.00066775	0.0403512	0.0375379	SEMA3G/SEMA4C/SEMA6C/SEMA3F	4
5	GO:0061387	regulation of extent of cell growth	6/270	31/7437	0.000741299	0.0437539	0.0407034	MAP3K13/SEMA3G/SEMA4C/SEMA6C/TTL/SEMA3F	6
5	GO:0032989	cellular component morphogenesis	20/270	251/7437	0.000762679	0.0439927	0.0409256	PAK6/CNTN4/FGFR2/MAP3K13/SEMA3G/EFNA3/EFNA4/CSRP1/STK11/NEBL/GATA3/STK25/SEMA4C/ARHGAP44/ACTA1/SEMA6C/TTL/PRKN/DVL1/SEMA3F	20
5	GO:0007409	axonogenesis	14/270	146/7437	0.000809573	0.0448779	0.0417491	CNTN4/FGFR2/MAP3K13/SEMA3G/EFNA3/EFNA4/STK11/GATA3/STK25/SEMA4C/SEMA6C/TTL/DVL1/SEMA3F	14
5	GO:0040007	growth	23/270	310/7437	0.000843389	0.0448779	0.0417491	PAK6/FGFR2/IGFBP5/LZTS2/KAZALD1/MAP3K13/SEMA3G/GDF5/FAM107A/GAS2/ADRA1A/STK11/GATA3/HNF1B/SEMA4C/DLL1/PPM1F/SEMA6C/BMPR1A/TTL/PRKN/DVL1/SEMA3F	23
5	GO:0090287	regulation of cellular response to growth factor stimulus	11/270	99/7437	0.000870568	0.0448779	0.0417491	BCL9L/GDF5/DCN/RGMA/NBL1/STK11/GATA3/PTP4A3/DLL1/PBLD/BAMBI	11
5	GO:0040008	regulation of growth	17/270	199/7437	0.000874362	0.0448779	0.0417491	FGFR2/IGFBP5/KAZALD1/MAP3K13/SEMA3G/GDF5/FAM107A/STK11/HNF1B/SEMA4C/DLL1/PPM1F/SEMA6C/BMPR1A/TTL/PRKN/SEMA3F	17
5	GO:0048812	neuron projection morphogenesis	17/270	200/7437	0.000924935	0.0448779	0.0417491	PAK6/CNTN4/FGFR2/MAP3K13/SEMA3G/EFNA3/EFNA4/STK11/GATA3/STK25/SEMA4C/ARHGAP44/SEMA6C/TTL/PRKN/DVL1/SEMA3F	17
5	GO:0050770	regulation of axonogenesis	7/270	44/7437	0.000930556	0.0448779	0.0417491	MAP3K13/SEMA3G/STK11/STK25/SEMA4C/SEMA6C/SEMA3F	7
5	GO:0048846	axon extension involved in axon guidance	4/270	13/7437	0.000937167	0.0448779	0.0417491	SEMA3G/SEMA4C/SEMA6C/SEMA3F	4
5	GO:0060390	regulation of SMAD protein signal transduction	4/270	13/7437	0.000937167	0.0448779	0.0417491	SH2B1/GDF5/PBLD/BMPR1A	4
5	GO:1902284	neuron projection extension involved in neuron projection guidance	4/270	13/7437	0.000937167	0.0448779	0.0417491	SEMA3G/SEMA4C/SEMA6C/SEMA3F	4
