# Supplementary material for: Phenotypic and Transcriptional Changes of Pulmonary Immune Responses in Dogs Following Canine Distemper Virus Infection
Source: Int J Mol Sci. 2022 Sep 2;23(17):10019. doi: 10.3390/ijms231710019 (PMC9456005; doi:10.3390/ijms231710019)
Supplement: Supplementary file 1 [file ijms-23-10019-s001.zip › Supplementary_Tables_S3_S4_Chludzinski_et_al_25.08.22.pdf]

*Supplementary material*

## Phenotypic and Transcriptional Changes of Pulmonary Immune Responses in Dogs Following Canine Distemper Virus Infection

Elisa Chludzinski<sup>1,4</sup>, Johanna Klemens<sup>1</sup>, Małgorzata Ciurkiewicz<sup>1</sup>, Robert Geffers<sup>2</sup>, Pauline Pöpperl<sup>1,4</sup>, Melanie Stoff<sup>1</sup>, Dai-Lun Shin<sup>3</sup>, Georg Herrler<sup>3,\*</sup>, Andreas Beineke<sup>1,4,\*</sup>

<sup>1</sup>Department of Pathology, University of Veterinary Medicine Hannover, 30559 Hannover, Germany

<sup>2</sup>Genome Analytics, Helmholtz Centre for Infection Research, 38124 Braunschweig, Germany

<sup>3</sup>Institute of Virology, University of Veterinary Medicine Hannover, 30559 Hannover, Germany

<sup>4</sup>Center for Systems Neuroscience (ZSN), 30559 Hannover, Germany

\*Both authors have contributed equally last (G.H., A.B.)

### Supplementary material:

This file includes: Supplementary Tables S3-S4

**Supplementary Table S3.** Anamnestic details of dogs used for evaluation of FFPE tissue

| Dog No | CDV status       | Group | Age [months] | Sex  | Breed                      | Mode of death |
|--------|------------------|-------|--------------|------|----------------------------|---------------|
| 1      | non-infected     | 1     | 4.5          | n.d. | Beagle                     | E             |
| 2      | non-infected     | 1     | 4.5          | n.d. | Beagle                     | E             |
| 3      | non-infected     | 1     | 4.5          | n.d. | Beagle                     | E             |
| 4      | non-infected     | 1     | 136.0        | f    | Beagle                     | E             |
| 5      | non-infected     | 1     | n.d.         | sf   | Rhodesian Ridgeback        | S             |
| 6      | non-infected     | 1     | 109.0        | sf   | Bolonka Zwetna             | E             |
| 7      | non-infected     | 1     | 2            | f    | Greater Swiss Mountain Dog | E             |
| 8      | CDV <sup>+</sup> | 2     | 24.0         | m    | Mixed breed                | E             |
| 9      | CDV <sup>+</sup> | 2     | 5.5          | m    | Old English Sheepdog       | S             |
| 10     | CDV <sup>+</sup> | 2     | 3.0          | w    | Mixed breed                | n.d.          |
| 11     | CDV <sup>+</sup> | 2     | 72.0         | m    | Mixed breed                | E             |
| 12     | CDV <sup>+</sup> | 2     | n.d.         | f    | n.d.                       | n.d.          |
| 13     | CDV <sup>+</sup> | 2     | 3.0          | w    | Mixed breed                | n.d.          |
| 14     | CDV <sup>+</sup> | 2     | 6.0          | w    | Mixed breed                | S             |
| 15     | CDV <sup>+</sup> | 2     | n.d.         | f    | Mixed breed                | n.d.          |
| 16     | CDV <sup>+</sup> | 2     | 3.0          | m    | Mixed breed                | E             |
| 17     | CDV <sup>+</sup> | 2     | 3.5          | f    | Jack Russell Terrier       | E             |
| 18     | CDV <sup>+</sup> | 2     | 3.0          | f    | English Bulldog            | E             |

| Dog No | CDV status       | Group | Age [months] | Sex  | Breed              | Mode of death |
|--------|------------------|-------|--------------|------|--------------------|---------------|
| 19     | CDV <sup>+</sup> | 2     | 2.0          | f    | Mixed breed        | E             |
| 20     | CDV <sup>+</sup> | 2     | n.d.         | f    | n.d.               | S             |
| 21     | CDV <sup>+</sup> | 2     | 17.0         | sf   | Mixed breed        | E             |
| 22     | CDV <sup>+</sup> | 2     | 6.0          | f    | n.d.               | E             |
| 23     | CDV <sup>+</sup> | 3     | n.d.         | n.d. | German Shepherd    | n.d.          |
| 24     | CDV <sup>+</sup> | 3     | 4.0          | m    | German Shepherd    | n.d.          |
| 25     | CDV <sup>+</sup> | 3     | n.d.         | n.d. | n.d.               | n.d.          |
| 26     | CDV <sup>+</sup> | 3     | 3.0          | f    | Dachshund          | S             |
| 27     | CDV <sup>+</sup> | 3     | 6.0          | sf   | Mixed breed        | n.d.          |
| 28     | CDV <sup>+</sup> | 3     | 2.0          | f    | Labrador Retriever | E             |
| 29     | CDV <sup>+</sup> | 3     | 2.0          | m    | Mixed breed        | E             |
| 30     | CDV <sup>+</sup> | 3     | 6.0          | m    | Mixed breed        | S             |
| 31     | CDV <sup>+</sup> | 3     | 3.0          | m    | Shih Tzu           | S             |
| 32     | CDV <sup>+</sup> | 3     | 5.0          | f    | Chihuahua          | S             |
| 33     | CDV <sup>+</sup> | 3     | 4.0          | f    | Mixed breed        | E             |
| 34     | CDV <sup>+</sup> | 4     | 4.0          | f    | Dachshund          | n.d.          |
| 35     | CDV <sup>+</sup> | 4     | 24.0         | f    | Mixed breed        | n.d.          |
| 36     | CDV <sup>+</sup> | 4     | n.d.         | m    | German Shepherd    | E             |
| 37     | CDV <sup>+</sup> | 4     | 6.0          | f    | German Shepherd    | n.d.          |
| 38     | CDV <sup>+</sup> | 4     | 10.0         | m    | German Shepherd    | n.d.          |
| 39     | CDV <sup>+</sup> | 4     | 8.0          | f    | Retriever          | n.d.          |
| 40     | CDV <sup>+</sup> | 4     | 7.0          | m    | Mixed breed        | E             |
| 41     | CDV <sup>+</sup> | 4     | 84.0         | m    | Miniature Pinscher | E             |
| 42     | CDV <sup>+</sup> | 4     | 12.0         | f    | Mixed breed        | E             |
| 43     | CDV <sup>+</sup> | 4     | 12.0         | sf   | Mixed breed        | S             |
| 44     | CDV <sup>+</sup> | 4     | 8.0          | f    | n.d.               | E             |

Groups: 1 = non-infected controls; 2 = acute CDV infection; 3 = subacute CDV infection; 4 = subacute-chronic CDV infection; f = female; sf = spayed female; m = male; n.d. = no data; E = euthanasia; S = spontaneous death.

**Supplementary Table S4.** Anamnestic details of dogs used for RT-qPCR and RNA-Seq analysis

| Dog No | CDV status       | Group | Age [months] | Sex  | Breed                      | Mode of death | RNA-Seq |
|--------|------------------|-------|--------------|------|----------------------------|---------------|---------|
| 1      | non-infected     | 1     | 83           | m    | Dalmatian                  | E             | X       |
| 2      | non-infected     | 1     | 134          | sf   | Mixed breed                | S             | X       |
| 3      | non-infected     | 1     | n.d.         | n.d. | n.d.                       | E             | X       |
| 4      | non-infected     | 1     | 178          | f    | Mixed breed                | E             |         |
| 5      | non-infected     | 1     | n.d.         | n.d. | n.d.                       | E             |         |
| 6      | non-infected     | 1     | 2            | f    | Greater Swiss Mountain Dog | E             | X       |
| 7      | CDV <sup>+</sup> | 2     | 5.5          | m    | Old English Sheepdog       | E             |         |
| 8      | CDV <sup>+</sup> | 2     | n.d.         | f    | n.d.                       | n.d.          |         |
| 9      | CDV <sup>+</sup> | 2     | 3.0          | f    | Mixed breed                | E             | X       |
| 10     | CDV <sup>+</sup> | 2     | 6.0          | f    | Mixed breed                | S             | X       |
| 11     | CDV <sup>+</sup> | 2     | n.d.         | f    | Mixed breed                | n.d.          |         |
| 12     | CDV <sup>+</sup> | 2     | 3.5          | f    | Jack Russell Terrier       | E             |         |
| 13     | CDV <sup>+</sup> | 2     | 3.0          | f    | English Bulldog            | E             | X       |
| 14     | CDV <sup>+</sup> | 2     | 2.0          | f    | Mixed breed                | E             | X       |
| 15     | CDV <sup>+</sup> | 2     | 6.0          | f    | n.d.                       | E             | X       |

Groups: 1 = non-infected controls; 2 = acute CDV infection; f = female; sf = spayed female; m = male; n.d. = no data; E = euthanasia; S = spontaneous death; X = used for RNA-Seq analysis (in addition to RT-qPCR).
